# Supplementary material for: Application of Statistical Mirroring in ANOVA-Like Tests<strong> </strong>
Source: Preprints.org preprint supplement (doi:10.20944/preprints201912.0074.v1), 2019-12-05
Supplement: Supplementary file 1 [file supplementary]

## Sheet: Psim & Pdsim 1
	OPTINALYSIS: SEQUENCE ANALYSIS THROUGH A LOOKING-GLASS
	CN = Central node; Kc = Kabirian coefficient of similarity; PSim. = Probability level of similarity; PDsim. = Probability level of dissimilarity																NUM. = Numeration; DEN. = Denumeration
				For Kc >1 and -ves		For Kc <1
	RESULTS	CN	Kc	Psim,	Pdsim.	Psim,	Pdsim.										NUM	DEN		NUM	DEN
	TA:GI	6	0.983109	1.07117	-0.0711709	0.933558	0.0664422										1.01689	0.949327		-0.949327	-1.01689
	TB:GI	6	0.987386	1.05244	-0.0524417	0.950171	0.0498286										1.01261	0.962157		-0.962157	-1.01261
	TC:GI	6	0.9885	1.04764	-0.0476428	0.954524	0.0454762										1.0115	0.965501		-0.965501	-1.0115
	TD:GI	6	0.983793	1.06814	-0.0681396	0.936207	0.0637928										1.01621	0.95138		-0.95138	-1.01621
	TE:GI	6	0.97848	1.09202	-0.0920217	0.915733	0.0842673										1.02152	0.935439		-0.935439	-1.02152
	TA:GII	6	0.971333	1.12546	-0.125456	0.888528	0.111472										1.02867	0.914		-0.914	-1.02867
	TB:GII	6	0.986686	1.05547	-0.0554725	0.947443	0.052557										1.01331	0.960057		-0.960057	-1.01331
	TC:GII	6	0.992316	1.03146	-0.0314626	0.969497	0.0305029										1.00768	0.976947		-0.976947	-1.00768
	TD:GII	6	0.997324	1.01079	-0.0107891	0.989326	0.0106739										1.00268	0.991973		-0.991973	-1.00268
	TE:GII	6	0.997904	1.00844	-0.00843841	0.991632	0.0083678										1.0021	0.993711		-0.993711	-1.0021
	TA:GIII	6	0.922686	1.40265	-0.402649	0.712937	0.287063										1.07731	0.768057		-0.768057	-1.07731
	TB:GIII	6	0.933891	1.32985	-0.329853	0.751963	0.248037										1.06611	0.801674		-0.801674	-1.06611
	TC:GIII	6	0.898728	1.58187	-0.581871	0.632163	0.367837										1.10127	0.696183		-0.696183	-1.10127
	TD:GIII	6	0.892287	1.63654	-0.636542	0.611044	0.388956										1.10771	0.676862		-0.676862	-1.10771
	TE:GIII	6	0.859824	1.96761	-0.967612	0.50823	0.49177										1.14018	0.579472		-0.579472	-1.14018
	TA:GIV	6	0.899471	1.57576	-0.575755	0.634616	0.365384										1.10053	0.698413		-0.698413	-1.10053
	TB:GIV	6	0.944453	1.26662	-0.266615	0.789506	0.210494										1.05555	0.83336		-0.83336	-1.05555
	TC:GIIV	6	0.888112	1.67368	-0.673684	0.597484	0.402516										1.11189	0.664336		-0.664336	-1.11189
	TD:GIV	6	0.89233	1.63617	-0.636173	0.611182	0.388818										1.10767	0.676989		-0.676989	-1.10767
	TE:GIV	6	0.871408	1.83743	-0.837432	0.544238	0.455762										1.12859	0.614223		-0.614223	-1.12859
	SEQUENCES	INPUT SEQUENCE																												SEQUENCES	COMPUTATION AND CALCULATIONS
	QUANTITATIVE SCALE	TA:GI	TB:GI	TC:GI	TD:GI	TE:GI	TA:GII	TB:GII	TC:GII	TD:GII	TE:GII	TA:GIII	TB:GIII	TC:GIII	TD:GIII	TE:GIII	TA:GIV	TB:GIV	TC:GIIV	TD:GIV	TE:GIV									QUANTITATIVE SCALE	TA:GI	TB:GI	TC:GI	TD:GI	TE:GI	TA:GII	TB:GII	TC:GII	TD:GII	TE:GII	TA:GIII	TB:GIII	TC:GIII	TD:GIII	TE:GIII	TA:GIV	TB:GIV	TC:GIIV	TD:GIV
	1	5.24	5.98	5.55	5.89	4.78	2.33	5.65	8.89	15.45	26.99	12.78	11.4	38.46	12.34	8.65	12	23.45	4	0.456	0.43									1	5.24	5.98	5.55	5.89	4.78	2.33	5.65	8.89	15.45	26.99	12.78	11.4	38.46	12.34	8.65	12	23.45	4	0.456
	2	5.63	6.46	6.45	6.45	5.98	2.45	6.78	8.89	15.78	27.56	23.45	23.54	45.32	45.56	34.76	26.34	23.45	7	0.54	0.56									2	11.26	12.92	12.9	12.9	11.96	4.9	13.56	17.78	31.56	55.12	46.9	47.08	90.64	91.12	69.52	52.68	46.9	14	1.08
	3	6.34	7.45	7.36	7.78	6.89	3.12	7.23	9.45	16.11	27.76	34.56	45.21	134.32	89.98	45.65	66.24	23.45	8	21.45	0.98									3	19.02	22.35	22.08	23.34	20.67	9.36	21.69	28.35	48.33	83.28	103.68	135.63	402.96	269.94	136.95	198.72	70.35	24	64.35
	4	6.98	7.45	7.43	8.45	7.77	3.44	7.87	9.99	16.34	28.02	67.34	76.45	256.34	156.56	78.23	123.45	23.66	9	45.67	10.35									4	27.92	29.8	29.72	33.8	31.08	13.76	31.48	39.96	65.36	112.08	269.36	305.8	1025.36	626.24	312.92	493.8	94.64	36	182.68
	5	7.87	8.21	7.45	8.56	8.34	4.67	7.98	10.56	16.46	28.51	121.23	89.45	783.34	643.23	6897.36	353.23	87.34	99	98.56	56.23									5	39.35	41.05	37.25	42.8	41.7	23.35	39.9	52.8	82.3	142.55	606.15	447.25	3916.7	3216.15	34486.8	1766.15	436.7	495	492.8
	6	0	0	0	0	0	0	0	0	0	0	0	0	0	0	0	0	0	0	0	0									6	0	0	0	0	0	0	0	0	0	0	0	0	0	0	0	0	0	0	0
	7	6.412	7.11	6.848	7.426	6.752	3.202	7.102	9.556	16.028	27.768	51.872	49.21	251.556	189.534	1412.93	116.252	36.27	25.4	33.3352	13.71									7	44.884	49.77	47.936	51.982	47.264	22.414	49.714	66.892	112.196	194.376	363.104	344.47	1760.89	1326.74	9890.5	813.764	253.89	177.8	233.346
	8	6.412	7.11	6.848	7.426	6.752	3.202	7.102	9.556	16.028	27.768	51.872	49.21	251.556	189.534	1412.93	116.252	36.27	25.4	33.3352	13.71									8	51.296	56.88	54.784	59.408	54.016	25.616	56.816	76.448	128.224	222.144	414.976	393.68	2012.45	1516.27	11303.4	930.016	290.16	203.2	266.682
	9	6.412	7.11	6.848	7.426	6.752	3.202	7.102	9.556	16.028	27.768	51.872	49.21	251.556	189.534	1412.93	116.252	36.27	25.4	33.3352	13.71									9	57.708	63.99	61.632	66.834	60.768	28.818	63.918	86.004	144.252	249.912	466.848	442.89	2264	1705.81	12716.4	1046.27	326.43	228.6	300.017
	10	6.412	7.11	6.848	7.426	6.752	3.202	7.102	9.556	16.028	27.768	51.872	49.21	251.556	189.534	1412.93	116.252	36.27	25.4	33.3352	13.71									10	64.12	71.1	68.48	74.26	67.52	32.02	71.02	95.56	160.28	277.68	518.72	492.1	2515.56	1895.34	14129.3	1162.52	362.7	254	333.352
	11	6.412	7.11	6.848	7.426	6.752	3.202	7.102	9.556	16.028	27.768	51.872	49.21	251.556	189.534	1412.93	116.252	36.27	25.4	33.3352	13.71									11	70.532	78.21	75.328	81.686	74.272	35.222	78.122	105.116	176.308	305.448	570.592	541.31	2767.12	2084.87	15542.2	1278.77	398.97	279.4	366.687
	12	0	0	0	0	0	0	0	0	0	0	0	0	0	0	0	0	0	0	0	0									12	0	0	0	0	0	0	0	0	0	0	0	0	0	0	0	0	0	0	0
	13	0	0	0	0	0	0	0	0	0	0	0	0	0	0	0	0	0	0	0	0									13	0	0	0	0	0	0	0	0	0	0	0	0	0	0	0	0	0	0	0
	14	0	0	0	0	0	0	0	0	0	0	0	0	0	0	0	0	0	0	0	0									14	0	0	0	0	0	0	0	0	0	0	0	0	0	0	0	0	0	0	0
	15	0	0	0	0	0	0	0	0	0	0	0	0	0	0	0	0	0	0	0	0									15	0	0	0	0	0	0	0	0	0	0	0	0	0	0	0	0	0	0	0
	16	0	0	0	0	0	0	0	0	0	0	0	0	0	0	0	0	0	0	0	0									16	0	0	0	0	0	0	0	0	0	0	0	0	0	0	0	0	0	0	0
	17	0	0	0	0	0	0	0	0	0	0	0	0	0	0	0	0	0	0	0	0									17	0	0	0	0	0	0	0	0	0	0	0	0	0	0	0	0	0	0	0
	18	0	0	0	0	0	0	0	0	0	0	0	0	0	0	0	0	0	0	0	0									18	0	0	0	0	0	0	0	0	0	0	0	0	0	0	0	0	0	0	0
	19	0	0	0	0	0	0	0	0	0	0	0	0	0	0	0	0	0	0	0	0									19	0	0	0	0	0	0	0	0	0	0	0	0	0	0	0	0	0	0	0
	20	0	0	0	0	0	0	0	0	0	0	0	0	0	0	0	0	0	0	0	0									20	0	0	0	0	0	0	0	0	0	0	0	0	0	0	0	0	0	0	0
	21	0	0	0	0	0	0	0	0	0	0	0	0	0	0	0	0	0	0	0	0									21	0	0	0	0	0	0	0	0	0	0	0	0	0	0	0	0	0	0	0
	22	0	0	0	0	0	0	0	0	0	0	0	0	0	0	0	0	0	0	0	0									22	0	0	0	0	0	0	0	0	0	0	0	0	0	0	0	0	0	0	0
	23	0	0	0	0	0	0	0	0	0	0	0	0	0	0	0	0	0	0	0	0									23	0	0	0	0	0	0	0	0	0	0	0	0	0	0	0	0	0	0	0
	24	0	0	0	0	0	0	0	0	0	0	0	0	0	0	0	0	0	0	0	0									24	0	0	0	0	0	0	0	0	0	0	0	0	0	0	0	0	0	0	0
	25	0	0	0	0	0	0	0	0	0	0	0	0	0	0	0	0	0	0	0	0									25	0	0	0	0	0	0	0	0	0	0	0	0	0	0	0	0	0	0	0
	26	0	0	0	0	0	0	0	0	0	0	0	0	0	0	0	0	0	0	0	0									26	0	0	0	0	0	0	0	0	0	0	0	0	0	0	0	0	0	0	0
	27	0	0	0	0	0	0	0	0	0	0	0	0	0	0	0	0	0	0	0	0									27	0	0	0	0	0	0	0	0	0	0	0	0	0	0	0	0	0	0	0
	28	0	0	0	0	0	0	0	0	0	0	0	0	0	0	0	0	0	0	0	0									28	0	0	0	0	0	0	0	0	0	0	0	0	0	0	0	0	0	0	0
	29	0	0	0	0	0	0	0	0	0	0	0	0	0	0	0	0	0	0	0	0									29	0	0	0	0	0	0	0	0	0	0	0	0	0	0	0	0	0	0	0
	30	0	0	0	0	0	0	0	0	0	0	0	0	0	0	0	0	0	0	0	0									30	0	0	0	0	0	0	0	0	0	0	0	0	0	0	0	0	0	0	0
	31	0	0	0	0	0	0	0	0	0	0	0	0	0	0	0	0	0	0	0	0									31	0	0	0	0	0	0	0	0	0	0	0	0	0	0	0	0	0	0	0
	32	0	0	0	0	0	0	0	0	0	0	0	0	0	0	0	0	0	0	0	0									32	0	0	0	0	0	0	0	0	0	0	0	0	0	0	0	0	0	0	0
	33	0	0	0	0	0	0	0	0	0	0	0	0	0	0	0	0	0	0	0	0									33	0	0	0	0	0	0	0	0	0	0	0	0	0	0	0	0	0	0	0
	34	0	0	0	0	0	0	0	0	0	0	0	0	0	0	0	0	0	0	0	0									34	0	0	0	0	0	0	0	0	0	0	0	0	0	0	0	0	0	0	0
	35	0	0	0	0	0	0	0	0	0	0	0	0	0	0	0	0	0	0	0	0									35	0	0	0	0	0	0	0	0	0	0	0	0	0	0	0	0	0	0	0
	36	0	0	0	0	0	0	0	0	0	0	0	0	0	0	0	0	0	0	0	0									36	0	0	0	0	0	0	0	0	0	0	0	0	0	0	0	0	0	0	0
	37	0	0	0	0	0	0	0	0	0	0	0	0	0	0	0	0	0	0	0	0									37	0	0	0	0	0	0	0	0	0	0	0	0	0	0	0	0	0	0	0
	38	0	0	0	0	0	0	0	0	0	0	0	0	0	0	0	0	0	0	0	0									38	0	0	0	0	0	0	0	0	0	0	0	0	0	0	0	0	0	0	0
	39	0	0	0	0	0	0	0	0	0	0	0	0	0	0	0	0	0	0	0	0									39	0	0	0	0	0	0	0	0	0	0	0	0	0	0	0	0	0	0	0
	40	0	0	0	0	0	0	0	0	0	0	0	0	0	0	0	0	0	0	0	0									40	0	0	0	0	0	0	0	0	0	0	0	0	0	0	0	0	0	0	0
	41	0	0	0	0	0	0	0	0	0	0	0	0	0	0	0	0	0	0	0	0									41	0	0	0	0	0	0	0	0	0	0	0	0	0	0	0	0	0	0	0
	42	0	0	0	0	0	0	0	0	0	0	0	0	0	0	0	0	0	0	0	0									42	0	0	0	0	0	0	0	0	0	0	0	0	0	0	0	0	0	0	0
	43	0	0	0	0	0	0	0	0	0	0	0	0	0	0	0	0	0	0	0	0									43	0	0	0	0	0	0	0	0	0	0	0	0	0	0	0	0	0	0	0
	44	0	0	0	0	0	0	0	0	0	0	0	0	0	0	0	0	0	0	0	0									44	0	0	0	0	0	0	0	0	0	0	0	0	0	0	0	0	0	0	0
	45	0	0	0	0	0	0	0	0	0	0	0	0	0	0	0	0	0	0	0	0									45	0	0	0	0	0	0	0	0	0	0	0	0	0	0	0	0	0	0	0
	46	0	0	0	0	0	0	0	0	0	0	0	0	0	0	0	0	0	0	0	0									46	0	0	0	0	0	0	0	0	0	0	0	0	0	0	0	0	0	0	0
	47	0	0	0	0	0	0	0	0	0	0	0	0	0	0	0	0	0	0	0	0									47	0	0	0	0	0	0	0	0	0	0	0	0	0	0	0	0	0	0	0
	48	0	0	0	0	0	0	0	0	0	0	0	0	0	0	0	0	0	0	0	0									48	0	0	0	0	0	0	0	0	0	0	0	0	0	0	0	0	0	0	0
	49	0	0	0	0	0	0	0	0	0	0	0	0	0	0	0	0	0	0	0	0									49	0	0	0	0	0	0	0	0	0	0	0	0	0	0	0	0	0	0	0
	50	0	0	0	0	0	0	0	0	0	0	0	0	0	0	0	0	0	0	0	0									50	0	0	0	0	0	0	0	0	0	0	0	0	0	0	0	0	0	0	0
	51	0	0	0	0	0	0	0	0	0	0	0	0	0	0	0	0	0	0	0	0									51	0	0	0	0	0	0	0	0	0	0	0	0	0	0	0	0	0	0	0
	52	0	0	0	0	0	0	0	0	0	0	0	0	0	0	0	0	0	0	0	0									52	0	0	0	0	0	0	0	0	0	0	0	0	0	0	0	0	0	0	0
	53	0	0	0	0	0	0	0	0	0	0	0	0	0	0	0	0	0	0	0	0									53	0	0	0	0	0	0	0	0	0	0	0	0	0	0	0	0	0	0	0
	54	0	0	0	0	0	0	0	0	0	0	0	0	0	0	0	0	0	0	0	0									54	0	0	0	0	0	0	0	0	0	0	0	0	0	0	0	0	0	0	0
	55	0	0	0	0	0	0	0	0	0	0	0	0	0	0	0	0	0	0	0	0									55	0	0	0	0	0	0	0	0	0	0	0	0	0	0	0	0	0	0	0
	56	0	0	0	0	0	0	0	0	0	0	0	0	0	0	0	0	0	0	0	0									56	0	0	0	0	0	0	0	0	0	0	0	0	0	0	0	0	0	0	0
	57	0	0	0	0	0	0	0	0	0	0	0	0	0	0	0	0	0	0	0	0									57	0	0	0	0	0	0	0	0	0	0	0	0	0	0	0	0	0	0	0
	58	0	0	0	0	0	0	0	0	0	0	0	0	0	0	0	0	0	0	0	0									58	0	0	0	0	0	0	0	0	0	0	0	0	0	0	0	0	0	0	0
	59	0	0	0	0	0	0	0	0	0	0	0	0	0	0	0	0	0	0	0	0									59	0	0	0	0	0	0	0	0	0	0	0	0	0	0	0	0	0	0	0
	60	0	0	0	0	0	0	0	0	0	0	0	0	0	0	0	0	0	0	0	0									60	0	0	0	0	0	0	0	0	0	0	0	0	0	0	0	0	0	0	0
	61	0	0	0	0	0	0	0	0	0	0	0	0	0	0	0	0	0	0	0	0									61	0	0	0	0	0	0	0	0	0	0	0	0	0	0	0	0	0	0	0
	62	0	0	0	0	0	0	0	0	0	0	0	0	0	0	0	0	0	0	0	0									62	0	0	0	0	0	0	0	0	0	0	0	0	0	0	0	0	0	0	0
	63	0	0	0	0	0	0	0	0	0	0	0	0	0	0	0	0	0	0	0	0									63	0	0	0	0	0	0	0	0	0	0	0	0	0	0	0	0	0	0	0
	64	0	0	0	0	0	0	0	0	0	0	0	0	0	0	0	0	0	0	0	0									64	0	0	0	0	0	0	0	0	0	0	0	0	0	0	0	0	0	0	0
	65	0	0	0	0	0	0	0	0	0	0	0	0	0	0	0	0	0	0	0	0									65	0	0	0	0	0	0	0	0	0	0	0	0	0	0	0	0	0	0	0
	66	0	0	0	0	0	0	0	0	0	0	0	0	0	0	0	0	0	0	0	0									66	0	0	0	0	0	0	0	0	0	0	0	0	0	0	0	0	0	0	0
	67	0	0	0	0	0	0	0	0	0	0	0	0	0	0	0	0	0	0	0	0									67	0	0	0	0	0	0	0	0	0	0	0	0	0	0	0	0	0	0	0
	68	0	0	0	0	0	0	0	0	0	0	0	0	0	0	0	0	0	0	0	0									68	0	0	0	0	0	0	0	0	0	0	0	0	0	0	0	0	0	0	0
	69	0	0	0	0	0	0	0	0	0	0	0	0	0	0	0	0	0	0	0	0									69	0	0	0	0	0	0	0	0	0	0	0	0	0	0	0	0	0	0	0
	70	0	0	0	0	0	0	0	0	0	0	0	0	0	0	0	0	0	0	0	0									70	0	0	0	0	0	0	0	0	0	0	0	0	0	0	0	0	0	0	0
	71	0	0	0	0	0	0	0	0	0	0	0	0	0	0	0	0	0	0	0	0									71	0	0	0	0	0	0	0	0	0	0	0	0	0	0	0	0	0	0	0
	72	0	0	0	0	0	0	0	0	0	0	0	0	0	0	0	0	0	0	0	0									72	0	0	0	0	0	0	0	0	0	0	0	0	0	0	0	0	0	0	0
	73	0	0	0	0	0	0	0	0	0	0	0	0	0	0	0	0	0	0	0	0									73	0	0	0	0	0	0	0	0	0	0	0	0	0	0	0	0	0	0	0
	74	0	0	0	0	0	0	0	0	0	0	0	0	0	0	0	0	0	0	0	0									74	0	0	0	0	0	0	0	0	0	0	0	0	0	0	0	0	0	0	0
	75	0	0	0	0	0	0	0	0	0	0	0	0	0	0	0	0	0	0	0	0									75	0	0	0	0	0	0	0	0	0	0	0	0	0	0	0	0	0	0	0
	76	0	0	0	0	0	0	0	0	0	0	0	0	0	0	0	0	0	0	0	0									76	0	0	0	0	0	0	0	0	0	0	0	0	0	0	0	0	0	0	0
	77	0	0	0	0	0	0	0	0	0	0	0	0	0	0	0	0	0	0	0	0									77	0	0	0	0	0	0	0	0	0	0	0	0	0	0	0	0	0	0	0
	78	0	0	0	0	0	0	0	0	0	0	0	0	0	0	0	0	0	0	0	0									78	0	0	0	0	0	0	0	0	0	0	0	0	0	0	0	0	0	0	0
	79	0	0	0	0	0	0	0	0	0	0	0	0	0	0	0	0	0	0	0	0									79	0	0	0	0	0	0	0	0	0	0	0	0	0	0	0	0	0	0	0
	80	0	0	0	0	0	0	0	0	0	0	0	0	0	0	0	0	0	0	0	0									80	0	0	0	0	0	0	0	0	0	0	0	0	0	0	0	0	0	0	0
	81	0	0	0	0	0	0	0	0	0	0	0	0	0	0	0	0	0	0	0	0									81	0	0	0	0	0	0	0	0	0	0	0	0	0	0	0	0	0	0	0
	82	0	0	0	0	0	0	0	0	0	0	0	0	0	0	0	0	0	0	0	0									82	0	0	0	0	0	0	0	0	0	0	0	0	0	0	0	0	0	0	0
	83	0	0	0	0	0	0	0	0	0	0	0	0	0	0	0	0	0	0	0	0									83	0	0	0	0	0	0	0	0	0	0	0	0	0	0	0	0	0	0	0
	84	0	0	0	0	0	0	0	0	0	0	0	0	0	0	0	0	0	0	0	0									84	0	0	0	0	0	0	0	0	0	0	0	0	0	0	0	0	0	0	0
	85	0	0	0	0	0	0	0	0	0	0	0	0	0	0	0	0	0	0	0	0									85	0	0	0	0	0	0	0	0	0	0	0	0	0	0	0	0	0	0	0
	86	0	0	0	0	0	0	0	0	0	0	0	0	0	0	0	0	0	0	0	0									86	0	0	0	0	0	0	0	0	0	0	0	0	0	0	0	0	0	0	0
	87	0	0	0	0	0	0	0	0	0	0	0	0	0	0	0	0	0	0	0	0									87	0	0	0	0	0	0	0	0	0	0	0	0	0	0	0	0	0	0	0
	88	0	0	0	0	0	0	0	0	0	0	0	0	0	0	0	0	0	0	0	0									88	0	0	0	0	0	0	0	0	0	0	0	0	0	0	0	0	0	0	0
	89	0	0	0	0	0	0	0	0	0	0	0	0	0	0	0	0	0	0	0	0									89	0	0	0	0	0	0	0	0	0	0	0	0	0	0	0	0	0	0	0
	90	0	0	0	0	0	0	0	0	0	0	0	0	0	0	0	0	0	0	0	0									90	0	0	0	0	0	0	0	0	0	0	0	0	0	0	0	0	0	0	0
	91	0	0	0	0	0	0	0	0	0	0	0	0	0	0	0	0	0	0	0	0									91	0	0	0	0	0	0	0	0	0	0	0	0	0	0	0	0	0	0	0
	92	0	0	0	0	0	0	0	0	0	0	0	0	0	0	0	0	0	0	0	0									92	0	0	0	0	0	0	0	0	0	0	0	0	0	0	0	0	0	0	0
	93	0	0	0	0	0	0	0	0	0	0	0	0	0	0	0	0	0	0	0	0									93	0	0	0	0	0	0	0	0	0	0	0	0	0	0	0	0	0	0	0
	94	0	0	0	0	0	0	0	0	0	0	0	0	0	0	0	0	0	0	0	0									94	0	0	0	0	0	0	0	0	0	0	0	0	0	0	0	0	0	0	0
	95	0	0	0	0	0	0	0	0	0	0	0	0	0	0	0	0	0	0	0	0									95	0	0	0	0	0	0	0	0	0	0	0	0	0	0	0	0	0	0	0
	96	0	0	0	0	0	0	0	0	0	0	0	0	0	0	0	0	0	0	0	0									96	0	0	0	0	0	0	0	0	0	0	0	0	0	0	0	0	0	0	0
	97	0	0	0	0	0	0	0	0	0	0	0	0	0	0	0	0	0	0	0	0									97	0	0	0	0	0	0	0	0	0	0	0	0	0	0	0	0	0	0	0
	98	0	0	0	0	0	0	0	0	0	0	0	0	0	0	0	0	0	0	0	0									98	0	0	0	0	0	0	0	0	0	0	0	0	0	0	0	0	0	0	0
	99	0	0	0	0	0	0	0	0	0	0	0	0	0	0	0	0	0	0	0	0									99	0	0	0	0	0	0	0	0	0	0	0	0	0	0	0	0	0	0	0
	100	0	0	0	0	0	0	0	0	0	0	0	0	0	0	0	0	0	0	0	0									100	0	0	0	0	0	0	0	0	0	0	0	0	0	0	0	0	0	0	0
	101	0	0	0	0	0	0	0	0	0	0	0	0	0	0	0	0	0	0	0	0									101	0	0	0	0	0	0	0	0	0	0	0	0	0	0	0	0	0	0	0
	102	0	0	0	0	0	0	0	0	0	0	0	0	0	0	0	0	0	0	0	0									102	0	0	0	0	0	0	0	0	0	0	0	0	0	0	0	0	0	0	0
	103	0	0	0	0	0	0	0	0	0	0	0	0	0	0	0	0	0	0	0	0									103	0	0	0	0	0	0	0	0	0	0	0	0	0	0	0	0	0	0	0
	104	0	0	0	0	0	0	0	0	0	0	0	0	0	0	0	0	0	0	0	0									104	0	0	0	0	0	0	0	0	0	0	0	0	0	0	0	0	0	0	0
	105	0	0	0	0	0	0	0	0	0	0	0	0	0	0	0	0	0	0	0	0									105	0	0	0	0	0	0	0	0	0	0	0	0	0	0	0	0	0	0	0
	106	0	0	0	0	0	0	0	0	0	0	0	0	0	0	0	0	0	0	0	0									106	0	0	0	0	0	0	0	0	0	0	0	0	0	0	0	0	0	0	0
	107	0	0	0	0	0	0	0	0	0	0	0	0	0	0	0	0	0	0	0	0									107	0	0	0	0	0	0	0	0	0	0	0	0	0	0	0	0	0	0	0
	108	0	0	0	0	0	0	0	0	0	0	0	0	0	0	0	0	0	0	0	0									108	0	0	0	0	0	0	0	0	0	0	0	0	0	0	0	0	0	0	0
	109	0	0	0	0	0	0	0	0	0	0	0	0	0	0	0	0	0	0	0	0									109	0	0	0	0	0	0	0	0	0	0	0	0	0	0	0	0	0	0	0
	110	0	0	0	0	0	0	0	0	0	0	0	0	0	0	0	0	0	0	0	0									110	0	0	0	0	0	0	0	0	0	0	0	0	0	0	0	0	0	0	0
	111	0	0	0	0	0	0	0	0	0	0	0	0	0	0	0	0	0	0	0	0									111	0	0	0	0	0	0	0	0	0	0	0	0	0	0	0	0	0	0	0
	112	0	0	0	0	0	0	0	0	0	0	0	0	0	0	0	0	0	0	0	0									112	0	0	0	0	0	0	0	0	0	0	0	0	0	0	0	0	0	0	0
	113	0	0	0	0	0	0	0	0	0	0	0	0	0	0	0	0	0	0	0	0									113	0	0	0	0	0	0	0	0	0	0	0	0	0	0	0	0	0	0	0
	114	0	0	0	0	0	0	0	0	0	0	0	0	0	0	0	0	0	0	0	0									114	0	0	0	0	0	0	0	0	0	0	0	0	0	0	0	0	0	0	0
	115	0	0	0	0	0	0	0	0	0	0	0	0	0	0	0	0	0	0	0	0									115	0	0	0	0	0	0	0	0	0	0	0	0	0	0	0	0	0	0	0
	116	0	0	0	0	0	0	0	0	0	0	0	0	0	0	0	0	0	0	0	0									116	0	0	0	0	0	0	0	0	0	0	0	0	0	0	0	0	0	0	0
	117	0	0	0	0	0	0	0	0	0	0	0	0	0	0	0	0	0	0	0	0									117	0	0	0	0	0	0	0	0	0	0	0	0	0	0	0	0	0	0	0
	118	0	0	0	0	0	0	0	0	0	0	0	0	0	0	0	0	0	0	0	0									118	0	0	0	0	0	0	0	0	0	0	0	0	0	0	0	0	0	0	0
	119	0	0	0	0	0	0	0	0	0	0	0	0	0	0	0	0	0	0	0	0									119	0	0	0	0	0	0	0	0	0	0	0	0	0	0	0	0	0	0	0
	120	0	0	0	0	0	0	0	0	0	0	0	0	0	0	0	0	0	0	0	0									120	0	0	0	0	0	0	0	0	0	0	0	0	0	0	0	0	0	0	0
	121	0	0	0	0	0	0	0	0	0	0	0	0	0	0	0	0	0	0	0	0									121	0	0	0	0	0	0	0	0	0	0	0	0	0	0	0	0	0	0	0
	122	0	0	0	0	0	0	0	0	0	0	0	0	0	0	0	0	0	0	0	0									122	0	0	0	0	0	0	0	0	0	0	0	0	0	0	0	0	0	0	0
	123	0	0	0	0	0	0	0	0	0	0	0	0	0	0	0	0	0	0	0	0									123	0	0	0	0	0	0	0	0	0	0	0	0	0	0	0	0	0	0	0
	124	0	0	0	0	0	0	0	0	0	0	0	0	0	0	0	0	0	0	0	0									124	0	0	0	0	0	0	0	0	0	0	0	0	0	0	0	0	0	0	0
	125	0	0	0	0	0	0	0	0	0	0	0	0	0	0	0	0	0	0	0	0									125	0	0	0	0	0	0	0	0	0	0	0	0	0	0	0	0	0	0	0
	126	0	0	0	0	0	0	0	0	0	0	0	0	0	0	0	0	0	0	0	0									126	0	0	0	0	0	0	0	0	0	0	0	0	0	0	0	0	0	0	0
	127	0	0	0	0	0	0	0	0	0	0	0	0	0	0	0	0	0	0	0	0									127	0	0	0	0	0	0	0	0	0	0	0	0	0	0	0	0	0	0	0
	128	0	0	0	0	0	0	0	0	0	0	0	0	0	0	0	0	0	0	0	0									128	0	0	0	0	0	0	0	0	0	0	0	0	0	0	0	0	0	0	0
	129	0	0	0	0	0	0	0	0	0	0	0	0	0	0	0	0	0	0	0	0									129	0	0	0	0	0	0	0	0	0	0	0	0	0	0	0	0	0	0	0
	130	0	0	0	0	0	0	0	0	0	0	0	0	0	0	0	0	0	0	0	0									130	0	0	0	0	0	0	0	0	0	0	0	0	0	0	0	0	0	0	0
	131	0	0	0	0	0	0	0	0	0	0	0	0	0	0	0	0	0	0	0	0									131	0	0	0	0	0	0	0	0	0	0	0	0	0	0	0	0	0	0	0
	132	0	0	0	0	0	0	0	0	0	0	0	0	0	0	0	0	0	0	0	0									132	0	0	0	0	0	0	0	0	0	0	0	0	0	0	0	0	0	0	0
	133	0	0	0	0	0	0	0	0	0	0	0	0	0	0	0	0	0	0	0	0									133	0	0	0	0	0	0	0	0	0	0	0	0	0	0	0	0	0	0	0
	134	0	0	0	0	0	0	0	0	0	0	0	0	0	0	0	0	0	0	0	0									134	0	0	0	0	0	0	0	0	0	0	0	0	0	0	0	0	0	0	0
	135	0	0	0	0	0	0	0	0	0	0	0	0	0	0	0	0	0	0	0	0									135	0	0	0	0	0	0	0	0	0	0	0	0	0	0	0	0	0	0	0
	136	0	0	0	0	0	0	0	0	0	0	0	0	0	0	0	0	0	0	0	0									136	0	0	0	0	0	0	0	0	0	0	0	0	0	0	0	0	0	0	0
	137	0	0	0	0	0	0	0	0	0	0	0	0	0	0	0	0	0	0	0	0									137	0	0	0	0	0	0	0	0	0	0	0	0	0	0	0	0	0	0	0
	138	0	0	0	0	0	0	0	0	0	0	0	0	0	0	0	0	0	0	0	0									138	0	0	0	0	0	0	0	0	0	0	0	0	0	0	0	0	0	0	0
	139	0	0	0	0	0	0	0	0	0	0	0	0	0	0	0	0	0	0	0	0									139	0	0	0	0	0	0	0	0	0	0	0	0	0	0	0	0	0	0	0
	140	0	0	0	0	0	0	0	0	0	0	0	0	0	0	0	0	0	0	0	0									140	0	0	0	0	0	0	0	0	0	0	0	0	0	0	0	0	0	0	0
	141	0	0	0	0	0	0	0	0	0	0	0	0	0	0	0	0	0	0	0	0									141	0	0	0	0	0	0	0	0	0	0	0	0	0	0	0	0	0	0	0
	142	0	0	0	0	0	0	0	0	0	0	0	0	0	0	0	0	0	0	0	0									142	0	0	0	0	0	0	0	0	0	0	0	0	0	0	0	0	0	0	0
	143	0	0	0	0	0	0	0	0	0	0	0	0	0	0	0	0	0	0	0	0									143	0	0	0	0	0	0	0	0	0	0	0	0	0	0	0	0	0	0	0
	144	0	0	0	0	0	0	0	0	0	0	0	0	0	0	0	0	0	0	0	0									144	0	0	0	0	0	0	0	0	0	0	0	0	0	0	0	0	0	0	0
	145	0	0	0	0	0	0	0	0	0	0	0	0	0	0	0	0	0	0	0	0									145	0	0	0	0	0	0	0	0	0	0	0	0	0	0	0	0	0	0	0
	146	0	0	0	0	0	0	0	0	0	0	0	0	0	0	0	0	0	0	0	0									146	0	0	0	0	0	0	0	0	0	0	0	0	0	0	0	0	0	0	0
	147	0	0	0	0	0	0	0	0	0	0	0	0	0	0	0	0	0	0	0	0									147	0	0	0	0	0	0	0	0	0	0	0	0	0	0	0	0	0	0	0
	148	0	0	0	0	0	0	0	0	0	0	0	0	0	0	0	0	0	0	0	0									148	0	0	0	0	0	0	0	0	0	0	0	0	0	0	0	0	0	0	0
	149	0	0	0	0	0	0	0	0	0	0	0	0	0	0	0	0	0	0	0	0									149	0	0	0	0	0	0	0	0	0	0	0	0	0	0	0	0	0	0	0
	150	0	0	0	0	0	0	0	0	0	0	0	0	0	0	0	0	0	0	0	0									150	0	0	0	0	0	0	0	0	0	0	0	0	0	0	0	0	0	0	0
	151	0	0	0	0	0	0	0	0	0	0	0	0	0	0	0	0	0	0	0	0									151	0	0	0	0	0	0	0	0	0	0	0	0	0	0	0	0	0	0	0
	152	0	0	0	0	0	0	0	0	0	0	0	0	0	0	0	0	0	0	0	0									152	0	0	0	0	0	0	0	0	0	0	0	0	0	0	0	0	0	0	0
	153	0	0	0	0	0	0	0	0	0	0	0	0	0	0	0	0	0	0	0	0									153	0	0	0	0	0	0	0	0	0	0	0	0	0	0	0	0	0	0	0
	154	0	0	0	0	0	0	0	0	0	0	0	0	0	0	0	0	0	0	0	0									154	0	0	0	0	0	0	0	0	0	0	0	0	0	0	0	0	0	0	0
	155	0	0	0	0	0	0	0	0	0	0	0	0	0	0	0	0	0	0	0	0									155	0	0	0	0	0	0	0	0	0	0	0	0	0	0	0	0	0	0	0
	156	0	0	0	0	0	0	0	0	0	0	0	0	0	0	0	0	0	0	0	0									156	0	0	0	0	0	0	0	0	0	0	0	0	0	0	0	0	0	0	0
	157	0	0	0	0	0	0	0	0	0	0	0	0	0	0	0	0	0	0	0	0									157	0	0	0	0	0	0	0	0	0	0	0	0	0	0	0	0	0	0	0
	158	0	0	0	0	0	0	0	0	0	0	0	0	0	0	0	0	0	0	0	0									158	0	0	0	0	0	0	0	0	0	0	0	0	0	0	0	0	0	0	0
	159	0	0	0	0	0	0	0	0	0	0	0	0	0	0	0	0	0	0	0	0									159	0	0	0	0	0	0	0	0	0	0	0	0	0	0	0	0	0	0	0
	160	0	0	0	0	0	0	0	0	0	0	0	0	0	0	0	0	0	0	0	0									160	0	0	0	0	0	0	0	0	0	0	0	0	0	0	0	0	0	0	0
	161	0	0	0	0	0	0	0	0	0	0	0	0	0	0	0	0	0	0	0	0									161	0	0	0	0	0	0	0	0	0	0	0	0	0	0	0	0	0	0	0
	162	0	0	0	0	0	0	0	0	0	0	0	0	0	0	0	0	0	0	0	0									162	0	0	0	0	0	0	0	0	0	0	0	0	0	0	0	0	0	0	0
	163	0	0	0	0	0	0	0	0	0	0	0	0	0	0	0	0	0	0	0	0									163	0	0	0	0	0	0	0	0	0	0	0	0	0	0	0	0	0	0	0
	164	0	0	0	0	0	0	0	0	0	0	0	0	0	0	0	0	0	0	0	0									164	0	0	0	0	0	0	0	0	0	0	0	0	0	0	0	0	0	0	0
	165	0	0	0	0	0	0	0	0	0	0	0	0	0	0	0	0	0	0	0	0									165	0	0	0	0	0	0	0	0	0	0	0	0	0	0	0	0	0	0	0
	166	0	0	0	0	0	0	0	0	0	0	0	0	0	0	0	0	0	0	0	0									166	0	0	0	0	0	0	0	0	0	0	0	0	0	0	0	0	0	0	0
	167	0	0	0	0	0	0	0	0	0	0	0	0	0	0	0	0	0	0	0	0									167	0	0	0	0	0	0	0	0	0	0	0	0	0	0	0	0	0	0	0
	168	0	0	0	0	0	0	0	0	0	0	0	0	0	0	0	0	0	0	0	0									168	0	0	0	0	0	0	0	0	0	0	0	0	0	0	0	0	0	0	0
	169	0	0	0	0	0	0	0	0	0	0	0	0	0	0	0	0	0	0	0	0									169	0	0	0	0	0	0	0	0	0	0	0	0	0	0	0	0	0	0	0
	170	0	0	0	0	0	0	0	0	0	0	0	0	0	0	0	0	0	0	0	0									170	0	0	0	0	0	0	0	0	0	0	0	0	0	0	0	0	0	0	0
	171	0	0	0	0	0	0	0	0	0	0	0	0	0	0	0	0	0	0	0	0									171	0	0	0	0	0	0	0	0	0	0	0	0	0	0	0	0	0	0	0
	172	0	0	0	0	0	0	0	0	0	0	0	0	0	0	0	0	0	0	0	0									172	0	0	0	0	0	0	0	0	0	0	0	0	0	0	0	0	0	0	0
	173	0	0	0	0	0	0	0	0	0	0	0	0	0	0	0	0	0	0	0	0									173	0	0	0	0	0	0	0	0	0	0	0	0	0	0	0	0	0	0	0
	174	0	0	0	0	0	0	0	0	0	0	0	0	0	0	0	0	0	0	0	0									174	0	0	0	0	0	0	0	0	0	0	0	0	0	0	0	0	0	0	0
	175	0	0	0	0	0	0	0	0	0	0	0	0	0	0	0	0	0	0	0	0									175	0	0	0	0	0	0	0	0	0	0	0	0	0	0	0	0	0	0	0
	176	0	0	0	0	0	0	0	0	0	0	0	0	0	0	0	0	0	0	0	0									176	0	0	0	0	0	0	0	0	0	0	0	0	0	0	0	0	0	0	0
	177	0	0	0	0	0	0	0	0	0	0	0	0	0	0	0	0	0	0	0	0									177	0	0	0	0	0	0	0	0	0	0	0	0	0	0	0	0	0	0	0
	178	0	0	0	0	0	0	0	0	0	0	0	0	0	0	0	0	0	0	0	0									178	0	0	0	0	0	0	0	0	0	0	0	0	0	0	0	0	0	0	0
	179	0	0	0	0	0	0	0	0	0	0	0	0	0	0	0	0	0	0	0	0									179	0	0	0	0	0	0	0	0	0	0	0	0	0	0	0	0	0	0	0
	180	0	0	0	0	0	0	0	0	0	0	0	0	0	0	0	0	0	0	0	0									180	0	0	0	0	0	0	0	0	0	0	0	0	0	0	0	0	0	0	0
	181	0	0	0	0	0	0	0	0	0	0	0	0	0	0	0	0	0	0	0	0									181	0	0	0	0	0	0	0	0	0	0	0	0	0	0	0	0	0	0	0
	182	0	0	0	0	0	0	0	0	0	0	0	0	0	0	0	0	0	0	0	0									182	0	0	0	0	0	0	0	0	0	0	0	0	0	0	0	0	0	0	0
	183	0	0	0	0	0	0	0	0	0	0	0	0	0	0	0	0	0	0	0	0									183	0	0	0	0	0	0	0	0	0	0	0	0	0	0	0	0	0	0	0
	184	0	0	0	0	0	0	0	0	0	0	0	0	0	0	0	0	0	0	0	0									184	0	0	0	0	0	0	0	0	0	0	0	0	0	0	0	0	0	0	0
	185	0	0	0	0	0	0	0	0	0	0	0	0	0	0	0	0	0	0	0	0									185	0	0	0	0	0	0	0	0	0	0	0	0	0	0	0	0	0	0	0
	186	0	0	0	0	0	0	0	0	0	0	0	0	0	0	0	0	0	0	0	0									186	0	0	0	0	0	0	0	0	0	0	0	0	0	0	0	0	0	0	0
	187	0	0	0	0	0	0	0	0	0	0	0	0	0	0	0	0	0	0	0	0									187	0	0	0	0	0	0	0	0	0	0	0	0	0	0	0	0	0	0	0
	188	0	0	0	0	0	0	0	0	0	0	0	0	0	0	0	0	0	0	0	0									188	0	0	0	0	0	0	0	0	0	0	0	0	0	0	0	0	0	0	0
	189	0	0	0	0	0	0	0	0	0	0	0	0	0	0	0	0	0	0	0	0									189	0	0	0	0	0	0	0	0	0	0	0	0	0	0	0	0	0	0	0
	190	0	0	0	0	0	0	0	0	0	0	0	0	0	0	0	0	0	0	0	0									190	0	0	0	0	0	0	0	0	0	0	0	0	0	0	0	0	0	0	0
	191	0	0	0	0	0	0	0	0	0	0	0	0	0	0	0	0	0	0	0	0									191	0	0	0	0	0	0	0	0	0	0	0	0	0	0	0	0	0	0	0
	192	0	0	0	0	0	0	0	0	0	0	0	0	0	0	0	0	0	0	0	0									192	0	0	0	0	0	0	0	0	0	0	0	0	0	0	0	0	0	0	0
	193	0	0	0	0	0	0	0	0	0	0	0	0	0	0	0	0	0	0	0	0									193	0	0	0	0	0	0	0	0	0	0	0	0	0	0	0	0	0	0	0
	194	0	0	0	0	0	0	0	0	0	0	0	0	0	0	0	0	0	0	0	0									194	0	0	0	0	0	0	0	0	0	0	0	0	0	0	0	0	0	0	0
	195	0	0	0	0	0	0	0	0	0	0	0	0	0	0	0	0	0	0	0	0									195	0	0	0	0	0	0	0	0	0	0	0	0	0	0	0	0	0	0	0
	196	0	0	0	0	0	0	0	0	0	0	0	0	0	0	0	0	0	0	0	0									196	0	0	0	0	0	0	0	0	0	0	0	0	0	0	0	0	0	0	0
	197	0	0	0	0	0	0	0	0	0	0	0	0	0	0	0	0	0	0	0	0									197	0	0	0	0	0	0	0	0	0	0	0	0	0	0	0	0	0	0	0
	198	0	0	0	0	0	0	0	0	0	0	0	0	0	0	0	0	0	0	0	0									198	0	0	0	0	0	0	0	0	0	0	0	0	0	0	0	0	0	0	0
	199	0	0	0	0	0	0	0	0	0	0	0	0	0	0	0	0	0	0	0	0									199	0	0	0	0	0	0	0	0	0	0	0	0	0	0	0	0	0	0	0
	200	0	0	0	0	0	0	0	0	0	0	0	0	0	0	0	0	0	0	0	0									200	0	0	0	0	0	0	0	0	0	0	0	0	0	0	0	0	0	0	0
	201	0	0	0	0	0	0	0	0	0	0	0	0	0	0	0	0	0	0	0	0									201	0	0	0	0	0	0	0	0	0	0	0	0	0	0	0	0	0	0	0
	202	0	0	0	0	0	0	0	0	0	0	0	0	0	0	0	0	0	0	0	0									202	0	0	0	0	0	0	0	0	0	0	0	0	0	0	0	0	0	0	0
	203	0	0	0	0	0	0	0	0	0	0	0	0	0	0	0	0	0	0	0	0									203	0	0	0	0	0	0	0	0	0	0	0	0	0	0	0	0	0	0	0
	204	0	0	0	0	0	0	0	0	0	0	0	0	0	0	0	0	0	0	0	0									204	0	0	0	0	0	0	0	0	0	0	0	0	0	0	0	0	0	0	0
	205	0	0	0	0	0	0	0	0	0	0	0	0	0	0	0	0	0	0	0	0									205	0	0	0	0	0	0	0	0	0	0	0	0	0	0	0	0	0	0	0
	206	0	0	0	0	0	0	0	0	0	0	0	0	0	0	0	0	0	0	0	0									206	0	0	0	0	0	0	0	0	0	0	0	0	0	0	0	0	0	0	0
	207	0	0	0	0	0	0	0	0	0	0	0	0	0	0	0	0	0	0	0	0									207	0	0	0	0	0	0	0	0	0	0	0	0	0	0	0	0	0	0	0
	208	0	0	0	0	0	0	0	0	0	0	0	0	0	0	0	0	0	0	0	0									208	0	0	0	0	0	0	0	0	0	0	0	0	0	0	0	0	0	0	0
	209	0	0	0	0	0	0	0	0	0	0	0	0	0	0	0	0	0	0	0	0									209	0	0	0	0	0	0	0	0	0	0	0	0	0	0	0	0	0	0	0
	210	0	0	0	0	0	0	0	0	0	0	0	0	0	0	0	0	0	0	0	0									210	0	0	0	0	0	0	0	0	0	0	0	0	0	0	0	0	0	0	0
	211	0	0	0	0	0	0	0	0	0	0	0	0	0	0	0	0	0	0	0	0									211	0	0	0	0	0	0	0	0	0	0	0	0	0	0	0	0	0	0	0
	212	0	0	0	0	0	0	0	0	0	0	0	0	0	0	0	0	0	0	0	0									212	0	0	0	0	0	0	0	0	0	0	0	0	0	0	0	0	0	0	0
	213	0	0	0	0	0	0	0	0	0	0	0	0	0	0	0	0	0	0	0	0									213	0	0	0	0	0	0	0	0	0	0	0	0	0	0	0	0	0	0	0
	214	0	0	0	0	0	0	0	0	0	0	0	0	0	0	0	0	0	0	0	0									214	0	0	0	0	0	0	0	0	0	0	0	0	0	0	0	0	0	0	0
	215	0	0	0	0	0	0	0	0	0	0	0	0	0	0	0	0	0	0	0	0									215	0	0	0	0	0	0	0	0	0	0	0	0	0	0	0	0	0	0	0
	216	0	0	0	0	0	0	0	0	0	0	0	0	0	0	0	0	0	0	0	0									216	0	0	0	0	0	0	0	0	0	0	0	0	0	0	0	0	0	0	0
	217	0	0	0	0	0	0	0	0	0	0	0	0	0	0	0	0	0	0	0	0									217	0	0	0	0	0	0	0	0	0	0	0	0	0	0	0	0	0	0	0
	218	0	0	0	0	0	0	0	0	0	0	0	0	0	0	0	0	0	0	0	0									218	0	0	0	0	0	0	0	0	0	0	0	0	0	0	0	0	0	0	0
	219	0	0	0	0	0	0	0	0	0	0	0	0	0	0	0	0	0	0	0	0									219	0	0	0	0	0	0	0	0	0	0	0	0	0	0	0	0	0	0	0
	220	0	0	0	0	0	0	0	0	0	0	0	0	0	0	0	0	0	0	0	0									220	0	0	0	0	0	0	0	0	0	0	0	0	0	0	0	0	0	0	0
	221	0	0	0	0	0	0	0	0	0	0	0	0	0	0	0	0	0	0	0	0									221	0	0	0	0	0	0	0	0	0	0	0	0	0	0	0	0	0	0	0
	222	0	0	0	0	0	0	0	0	0	0	0	0	0	0	0	0	0	0	0	0									222	0	0	0	0	0	0	0	0	0	0	0	0	0	0	0	0	0	0	0
	223	0	0	0	0	0	0	0	0	0	0	0	0	0	0	0	0	0	0	0	0									223	0	0	0	0	0	0	0	0	0	0	0	0	0	0	0	0	0	0	0
	224	0	0	0	0	0	0	0	0	0	0	0	0	0	0	0	0	0	0	0	0									224	0	0	0	0	0	0	0	0	0	0	0	0	0	0	0	0	0	0	0
	225	0	0	0	0	0	0	0	0	0	0	0	0	0	0	0	0	0	0	0	0									225	0	0	0	0	0	0	0	0	0	0	0	0	0	0	0	0	0	0	0
	226	0	0	0	0	0	0	0	0	0	0	0	0	0	0	0	0	0	0	0	0									226	0	0	0	0	0	0	0	0	0	0	0	0	0	0	0	0	0	0	0
	227	0	0	0	0	0	0	0	0	0	0	0	0	0	0	0	0	0	0	0	0									227	0	0	0	0	0	0	0	0	0	0	0	0	0	0	0	0	0	0	0
	228	0	0	0	0	0	0	0	0	0	0	0	0	0	0	0	0	0	0	0	0									228	0	0	0	0	0	0	0	0	0	0	0	0	0	0	0	0	0	0	0
	229	0	0	0	0	0	0	0	0	0	0	0	0	0	0	0	0	0	0	0	0									229	0	0	0	0	0	0	0	0	0	0	0	0	0	0	0	0	0	0	0
	230	0	0	0	0	0	0	0	0	0	0	0	0	0	0	0	0	0	0	0	0									230	0	0	0	0	0	0	0	0	0	0	0	0	0	0	0	0	0	0	0
	231	0	0	0	0	0	0	0	0	0	0	0	0	0	0	0	0	0	0	0	0									231	0	0	0	0	0	0	0	0	0	0	0	0	0	0	0	0	0	0	0
	232	0	0	0	0	0	0	0	0	0	0	0	0	0	0	0	0	0	0	0	0									232	0	0	0	0	0	0	0	0	0	0	0	0	0	0	0	0	0	0	0
	233	0	0	0	0	0	0	0	0	0	0	0	0	0	0	0	0	0	0	0	0									233	0	0	0	0	0	0	0	0	0	0	0	0	0	0	0	0	0	0	0
	234	0	0	0	0	0	0	0	0	0	0	0	0	0	0	0	0	0	0	0	0									234	0	0	0	0	0	0	0	0	0	0	0	0	0	0	0	0	0	0	0
	235	0	0	0	0	0	0	0	0	0	0	0	0	0	0	0	0	0	0	0	0									235	0	0	0	0	0	0	0	0	0	0	0	0	0	0	0	0	0	0	0
	236	0	0	0	0	0	0	0	0	0	0	0	0	0	0	0	0	0	0	0	0									236	0	0	0	0	0	0	0	0	0	0	0	0	0	0	0	0	0	0	0
	237	0	0	0	0	0	0	0	0	0	0	0	0	0	0	0	0	0	0	0	0									237	0	0	0	0	0	0	0	0	0	0	0	0	0	0	0	0	0	0	0
	238	0	0	0	0	0	0	0	0	0	0	0	0	0	0	0	0	0	0	0	0									238	0	0	0	0	0	0	0	0	0	0	0	0	0	0	0	0	0	0	0
	239	0	0	0	0	0	0	0	0	0	0	0	0	0	0	0	0	0	0	0	0									239	0	0	0	0	0	0	0	0	0	0	0	0	0	0	0	0	0	0	0
	240	0	0	0	0	0	0	0	0	0	0	0	0	0	0	0	0	0	0	0	0									240	0	0	0	0	0	0	0	0	0	0	0	0	0	0	0	0	0	0	0
	241	0	0	0	0	0	0	0	0	0	0	0	0	0	0	0	0	0	0	0	0									241	0	0	0	0	0	0	0	0	0	0	0	0	0	0	0	0	0	0	0
	242	0	0	0	0	0	0	0	0	0	0	0	0	0	0	0	0	0	0	0	0									242	0	0	0	0	0	0	0	0	0	0	0	0	0	0	0	0	0	0	0
	243	0	0	0	0	0	0	0	0	0	0	0	0	0	0	0	0	0	0	0	0									243	0	0	0	0	0	0	0	0	0	0	0	0	0	0	0	0	0	0	0
	244	0	0	0	0	0	0	0	0	0	0	0	0	0	0	0	0	0	0	0	0									244	0	0	0	0	0	0	0	0	0	0	0	0	0	0	0	0	0	0	0
	245	0	0	0	0	0	0	0	0	0	0	0	0	0	0	0	0	0	0	0	0									245	0	0	0	0	0	0	0	0	0	0	0	0	0	0	0	0	0	0	0
	246	0	0	0	0	0	0	0	0	0	0	0	0	0	0	0	0	0	0	0	0									246	0	0	0	0	0	0	0	0	0	0	0	0	0	0	0	0	0	0	0
	247	0	0	0	0	0	0	0	0	0	0	0	0	0	0	0	0	0	0	0	0									247	0	0	0	0	0	0	0	0	0	0	0	0	0	0	0	0	0	0	0
	248	0	0	0	0	0	0	0	0	0	0	0	0	0	0	0	0	0	0	0	0									248	0	0	0	0	0	0	0	0	0	0	0	0	0	0	0	0	0	0	0
	249	0	0	0	0	0	0	0	0	0	0	0	0	0	0	0	0	0	0	0	0									249	0	0	0	0	0	0	0	0	0	0	0	0	0	0	0	0	0	0	0
	250	0	0	0	0	0	0	0	0	0	0	0	0	0	0	0	0	0	0	0	0									250	0	0	0	0	0	0	0	0	0	0	0	0	0	0	0	0	0	0	0
	251	0	0	0	0	0	0	0	0	0	0	0	0	0	0	0	0	0	0	0	0									251	0	0	0	0	0	0	0	0	0	0	0	0	0	0	0	0	0	0	0
	252	0	0	0	0	0	0	0	0	0	0	0	0	0	0	0	0	0	0	0	0									252	0	0	0	0	0	0	0	0	0	0	0	0	0	0	0	0	0	0	0
	253	0	0	0	0	0	0	0	0	0	0	0	0	0	0	0	0	0	0	0	0									253	0	0	0	0	0	0	0	0	0	0	0	0	0	0	0	0	0	0	0
	254	0	0	0	0	0	0	0	0	0	0	0	0	0	0	0	0	0	0	0	0									254	0	0	0	0	0	0	0	0	0	0	0	0	0	0	0	0	0	0	0
	255	0	0	0	0	0	0	0	0	0	0	0	0	0	0	0	0	0	0	0	0									255	0	0	0	0	0	0	0	0	0	0	0	0	0	0	0	0	0	0	0
	256	0	0	0	0	0	0	0	0	0	0	0	0	0	0	0	0	0	0	0	0									256	0	0	0	0	0	0	0	0	0	0	0	0	0	0	0	0	0	0	0
	257	0	0	0	0	0	0	0	0	0	0	0	0	0	0	0	0	0	0	0	0									257	0	0	0	0	0	0	0	0	0	0	0	0	0	0	0	0	0	0	0
	258	0	0	0	0	0	0	0	0	0	0	0	0	0	0	0	0	0	0	0	0									258	0	0	0	0	0	0	0	0	0	0	0	0	0	0	0	0	0	0	0
	259	0	0	0	0	0	0	0	0	0	0	0	0	0	0	0	0	0	0	0	0									259	0	0	0	0	0	0	0	0	0	0	0	0	0	0	0	0	0	0	0
	260	0	0	0	0	0	0	0	0	0	0	0	0	0	0	0	0	0	0	0	0									260	0	0	0	0	0	0	0	0	0	0	0	0	0	0	0	0	0	0	0
	261	0	0	0	0	0	0	0	0	0	0	0	0	0	0	0	0	0	0	0	0									261	0	0	0	0	0	0	0	0	0	0	0	0	0	0	0	0	0	0	0
	262	0	0	0	0	0	0	0	0	0	0	0	0	0	0	0	0	0	0	0	0									262	0	0	0	0	0	0	0	0	0	0	0	0	0	0	0	0	0	0	0
	263	0	0	0	0	0	0	0	0	0	0	0	0	0	0	0	0	0	0	0	0									263	0	0	0	0	0	0	0	0	0	0	0	0	0	0	0	0	0	0	0
	264	0	0	0	0	0	0	0	0	0	0	0	0	0	0	0	0	0	0	0	0									264	0	0	0	0	0	0	0	0	0	0	0	0	0	0	0	0	0	0	0
	265	0	0	0	0	0	0	0	0	0	0	0	0	0	0	0	0	0	0	0	0									265	0	0	0	0	0	0	0	0	0	0	0	0	0	0	0	0	0	0	0
	266	0	0	0	0	0	0	0	0	0	0	0	0	0	0	0	0	0	0	0	0									266	0	0	0	0	0	0	0	0	0	0	0	0	0	0	0	0	0	0	0
	267	0	0	0	0	0	0	0	0	0	0	0	0	0	0	0	0	0	0	0	0									267	0	0	0	0	0	0	0	0	0	0	0	0	0	0	0	0	0	0	0
	268	0	0	0	0	0	0	0	0	0	0	0	0	0	0	0	0	0	0	0	0									268	0	0	0	0	0	0	0	0	0	0	0	0	0	0	0	0	0	0	0
	269	0	0	0	0	0	0	0	0	0	0	0	0	0	0	0	0	0	0	0	0									269	0	0	0	0	0	0	0	0	0	0	0	0	0	0	0	0	0	0	0
	270	0	0	0	0	0	0	0	0	0	0	0	0	0	0	0	0	0	0	0	0									270	0	0	0	0	0	0	0	0	0	0	0	0	0	0	0	0	0	0	0
	271	0	0	0	0	0	0	0	0	0	0	0	0	0	0	0	0	0	0	0	0									271	0	0	0	0	0	0	0	0	0	0	0	0	0	0	0	0	0	0	0
	272	0	0	0	0	0	0	0	0	0	0	0	0	0	0	0	0	0	0	0	0									272	0	0	0	0	0	0	0	0	0	0	0	0	0	0	0	0	0	0	0
	273	0	0	0	0	0	0	0	0	0	0	0	0	0	0	0	0	0	0	0	0									273	0	0	0	0	0	0	0	0	0	0	0	0	0	0	0	0	0	0	0
	274	0	0	0	0	0	0	0	0	0	0	0	0	0	0	0	0	0	0	0	0									274	0	0	0	0	0	0	0	0	0	0	0	0	0	0	0	0	0	0	0
	275	0	0	0	0	0	0	0	0	0	0	0	0	0	0	0	0	0	0	0	0									275	0	0	0	0	0	0	0	0	0	0	0	0	0	0	0	0	0	0	0
	276	0	0	0	0	0	0	0	0	0	0	0	0	0	0	0	0	0	0	0	0									276	0	0	0	0	0	0	0	0	0	0	0	0	0	0	0	0	0	0	0
	277	0	0	0	0	0	0	0	0	0	0	0	0	0	0	0	0	0	0	0	0									277	0	0	0	0	0	0	0	0	0	0	0	0	0	0	0	0	0	0	0
	278	0	0	0	0	0	0	0	0	0	0	0	0	0	0	0	0	0	0	0	0									278	0	0	0	0	0	0	0	0	0	0	0	0	0	0	0	0	0	0	0
	279	0	0	0	0	0	0	0	0	0	0	0	0	0	0	0	0	0	0	0	0									279	0	0	0	0	0	0	0	0	0	0	0	0	0	0	0	0	0	0	0
	280	0	0	0	0	0	0	0	0	0	0	0	0	0	0	0	0	0	0	0	0									280	0	0	0	0	0	0	0	0	0	0	0	0	0	0	0	0	0	0	0
	281	0	0	0	0	0	0	0	0	0	0	0	0	0	0	0	0	0	0	0	0									281	0	0	0	0	0	0	0	0	0	0	0	0	0	0	0	0	0	0	0
	282	0	0	0	0	0	0	0	0	0	0	0	0	0	0	0	0	0	0	0	0									282	0	0	0	0	0	0	0	0	0	0	0	0	0	0	0	0	0	0	0
	283	0	0	0	0	0	0	0	0	0	0	0	0	0	0	0	0	0	0	0	0									283	0	0	0	0	0	0	0	0	0	0	0	0	0	0	0	0	0	0	0
	284	0	0	0	0	0	0	0	0	0	0	0	0	0	0	0	0	0	0	0	0									284	0	0	0	0	0	0	0	0	0	0	0	0	0	0	0	0	0	0	0
	285	0	0	0	0	0	0	0	0	0	0	0	0	0	0	0	0	0	0	0	0									285	0	0	0	0	0	0	0	0	0	0	0	0	0	0	0	0	0	0	0
	286	0	0	0	0	0	0	0	0	0	0	0	0	0	0	0	0	0	0	0	0									286	0	0	0	0	0	0	0	0	0	0	0	0	0	0	0	0	0	0	0
	287	0	0	0	0	0	0	0	0	0	0	0	0	0	0	0	0	0	0	0	0									287	0	0	0	0	0	0	0	0	0	0	0	0	0	0	0	0	0	0	0
	288	0	0	0	0	0	0	0	0	0	0	0	0	0	0	0	0	0	0	0	0									288	0	0	0	0	0	0	0	0	0	0	0	0	0	0	0	0	0	0	0
	289	0	0	0	0	0	0	0	0	0	0	0	0	0	0	0	0	0	0	0	0									289	0	0	0	0	0	0	0	0	0	0	0	0	0	0	0	0	0	0	0
	290	0	0	0	0	0	0	0	0	0	0	0	0	0	0	0	0	0	0	0	0									290	0	0	0	0	0	0	0	0	0	0	0	0	0	0	0	0	0	0	0
	291	0	0	0	0	0	0	0	0	0	0	0	0	0	0	0	0	0	0	0	0									291	0	0	0	0	0	0	0	0	0	0	0	0	0	0	0	0	0	0	0
	292	0	0	0	0	0	0	0	0	0	0	0	0	0	0	0	0	0	0	0	0									292	0	0	0	0	0	0	0	0	0	0	0	0	0	0	0	0	0	0	0
	293	0	0	0	0	0	0	0	0	0	0	0	0	0	0	0	0	0	0	0	0									293	0	0	0	0	0	0	0	0	0	0	0	0	0	0	0	0	0	0	0
	294	0	0	0	0	0	0	0	0	0	0	0	0	0	0	0	0	0	0	0	0									294	0	0	0	0	0	0	0	0	0	0	0	0	0	0	0	0	0	0	0
	295	0	0	0	0	0	0	0	0	0	0	0	0	0	0	0	0	0	0	0	0									295	0	0	0	0	0	0	0	0	0	0	0	0	0	0	0	0	0	0	0
	296	0	0	0	0	0	0	0	0	0	0	0	0	0	0	0	0	0	0	0	0									296	0	0	0	0	0	0	0	0	0	0	0	0	0	0	0	0	0	0	0
	297	0	0	0	0	0	0	0	0	0	0	0	0	0	0	0	0	0	0	0	0									297	0	0	0	0	0	0	0	0	0	0	0	0	0	0	0	0	0	0	0
	298	0	0	0	0	0	0	0	0	0	0	0	0	0	0	0	0	0	0	0	0									298	0	0	0	0	0	0	0	0	0	0	0	0	0	0	0	0	0	0	0
	299	0	0	0	0	0	0	0	0	0	0	0	0	0	0	0	0	0	0	0	0									299	0	0	0	0	0	0	0	0	0	0	0	0	0	0	0	0	0	0	0
	300	0	0	0	0	0	0	0	0	0	0	0	0	0	0	0	0	0	0	0	0									300	0	0	0	0	0	0	0	0	0	0	0	0	0	0	0	0	0	0	0
	301	0	0	0	0	0	0	0	0	0	0	0	0	0	0	0	0	0	0	0	0									301	0	0	0	0	0	0	0	0	0	0	0	0	0	0	0	0	0	0	0
	302	0	0	0	0	0	0	0	0	0	0	0	0	0	0	0	0	0	0	0	0									302	0	0	0	0	0	0	0	0	0	0	0	0	0	0	0	0	0	0	0
	303	0	0	0	0	0	0	0	0	0	0	0	0	0	0	0	0	0	0	0	0									303	0	0	0	0	0	0	0	0	0	0	0	0	0	0	0	0	0	0	0
	304	0	0	0	0	0	0	0	0	0	0	0	0	0	0	0	0	0	0	0	0									304	0	0	0	0	0	0	0	0	0	0	0	0	0	0	0	0	0	0	0
	305	0	0	0	0	0	0	0	0	0	0	0	0	0	0	0	0	0	0	0	0									305	0	0	0	0	0	0	0	0	0	0	0	0	0	0	0	0	0	0	0
	306	0	0	0	0	0	0	0	0	0	0	0	0	0	0	0	0	0	0	0	0									306	0	0	0	0	0	0	0	0	0	0	0	0	0	0	0	0	0	0	0
	307	0	0	0	0	0	0	0	0	0	0	0	0	0	0	0	0	0	0	0	0									307	0	0	0	0	0	0	0	0	0	0	0	0	0	0	0	0	0	0	0
	308	0	0	0	0	0	0	0	0	0	0	0	0	0	0	0	0	0	0	0	0									308	0	0	0	0	0	0	0	0	0	0	0	0	0	0	0	0	0	0	0
	309	0	0	0	0	0	0	0	0	0	0	0	0	0	0	0	0	0	0	0	0									309	0	0	0	0	0	0	0	0	0	0	0	0	0	0	0	0	0	0	0
	310	0	0	0	0	0	0	0	0	0	0	0	0	0	0	0	0	0	0	0	0									310	0	0	0	0	0	0	0	0	0	0	0	0	0	0	0	0	0	0	0
	311	0	0	0	0	0	0	0	0	0	0	0	0	0	0	0	0	0	0	0	0									311	0	0	0	0	0	0	0	0	0	0	0	0	0	0	0	0	0	0	0
	312	0	0	0	0	0	0	0	0	0	0	0	0	0	0	0	0	0	0	0	0									312	0	0	0	0	0	0	0	0	0	0	0	0	0	0	0	0	0	0	0
	313	0	0	0	0	0	0	0	0	0	0	0	0	0	0	0	0	0	0	0	0									313	0	0	0	0	0	0	0	0	0	0	0	0	0	0	0	0	0	0	0
	314	0	0	0	0	0	0	0	0	0	0	0	0	0	0	0	0	0	0	0	0									314	0	0	0	0	0	0	0	0	0	0	0	0	0	0	0	0	0	0	0
	315	0	0	0	0	0	0	0	0	0	0	0	0	0	0	0	0	0	0	0	0									315	0	0	0	0	0	0	0	0	0	0	0	0	0	0	0	0	0	0	0
	316	0	0	0	0	0	0	0	0	0	0	0	0	0	0	0	0	0	0	0	0									316	0	0	0	0	0	0	0	0	0	0	0	0	0	0	0	0	0	0	0
	317	0	0	0	0	0	0	0	0	0	0	0	0	0	0	0	0	0	0	0	0									317	0	0	0	0	0	0	0	0	0	0	0	0	0	0	0	0	0	0	0
	318	0	0	0	0	0	0	0	0	0	0	0	0	0	0	0	0	0	0	0	0									318	0	0	0	0	0	0	0	0	0	0	0	0	0	0	0	0	0	0	0
	319	0	0	0	0	0	0	0	0	0	0	0	0	0	0	0	0	0	0	0	0									319	0	0	0	0	0	0	0	0	0	0	0	0	0	0	0	0	0	0	0
	320	0	0	0	0	0	0	0	0	0	0	0	0	0	0	0	0	0	0	0	0									320	0	0	0	0	0	0	0	0	0	0	0	0	0	0	0	0	0	0	0
	321	0	0	0	0	0	0	0	0	0	0	0	0	0	0	0	0	0	0	0	0									321	0	0	0	0	0	0	0	0	0	0	0	0	0	0	0	0	0	0	0
	322	0	0	0	0	0	0	0	0	0	0	0	0	0	0	0	0	0	0	0	0									322	0	0	0	0	0	0	0	0	0	0	0	0	0	0	0	0	0	0	0
	323	0	0	0	0	0	0	0	0	0	0	0	0	0	0	0	0	0	0	0	0									323	0	0	0	0	0	0	0	0	0	0	0	0	0	0	0	0	0	0	0
	324	0	0	0	0	0	0	0	0	0	0	0	0	0	0	0	0	0	0	0	0									324	0	0	0	0	0	0	0	0	0	0	0	0	0	0	0	0	0	0	0
	325	0	0	0	0	0	0	0	0	0	0	0	0	0	0	0	0	0	0	0	0									325	0	0	0	0	0	0	0	0	0	0	0	0	0	0	0	0	0	0	0
	326	0	0	0	0	0	0	0	0	0	0	0	0	0	0	0	0	0	0	0	0									326	0	0	0	0	0	0	0	0	0	0	0	0	0	0	0	0	0	0	0
	327	0	0	0	0	0	0	0	0	0	0	0	0	0	0	0	0	0	0	0	0									327	0	0	0	0	0	0	0	0	0	0	0	0	0	0	0	0	0	0	0
	328	0	0	0	0	0	0	0	0	0	0	0	0	0	0	0	0	0	0	0	0									328	0	0	0	0	0	0	0	0	0	0	0	0	0	0	0	0	0	0	0
	329	0	0	0	0	0	0	0	0	0	0	0	0	0	0	0	0	0	0	0	0									329	0	0	0	0	0	0	0	0	0	0	0	0	0	0	0	0	0	0	0
	330	0	0	0	0	0	0	0	0	0	0	0	0	0	0	0	0	0	0	0	0									330	0	0	0	0	0	0	0	0	0	0	0	0	0	0	0	0	0	0	0
	331	0	0	0	0	0	0	0	0	0	0	0	0	0	0	0	0	0	0	0	0									331	0	0	0	0	0	0	0	0	0	0	0	0	0	0	0	0	0	0	0
	332	0	0	0	0	0	0	0	0	0	0	0	0	0	0	0	0	0	0	0	0									332	0	0	0	0	0	0	0	0	0	0	0	0	0	0	0	0	0	0	0
	333	0	0	0	0	0	0	0	0	0	0	0	0	0	0	0	0	0	0	0	0									333	0	0	0	0	0	0	0	0	0	0	0	0	0	0	0	0	0	0	0
	334	0	0	0	0	0	0	0	0	0	0	0	0	0	0	0	0	0	0	0	0									334	0	0	0	0	0	0	0	0	0	0	0	0	0	0	0	0	0	0	0
	335	0	0	0	0	0	0	0	0	0	0	0	0	0	0	0	0	0	0	0	0									335	0	0	0	0	0	0	0	0	0	0	0	0	0	0	0	0	0	0	0
	336	0	0	0	0	0	0	0	0	0	0	0	0	0	0	0	0	0	0	0	0									336	0	0	0	0	0	0	0	0	0	0	0	0	0	0	0	0	0	0	0
	337	0	0	0	0	0	0	0	0	0	0	0	0	0	0	0	0	0	0	0	0									337	0	0	0	0	0	0	0	0	0	0	0	0	0	0	0	0	0	0	0
	338	0	0	0	0	0	0	0	0	0	0	0	0	0	0	0	0	0	0	0	0									338	0	0	0	0	0	0	0	0	0	0	0	0	0	0	0	0	0	0	0
	339	0	0	0	0	0	0	0	0	0	0	0	0	0	0	0	0	0	0	0	0									339	0	0	0	0	0	0	0	0	0	0	0	0	0	0	0	0	0	0	0
	340	0	0	0	0	0	0	0	0	0	0	0	0	0	0	0	0	0	0	0	0									340	0	0	0	0	0	0	0	0	0	0	0	0	0	0	0	0	0	0	0
	341	0	0	0	0	0	0	0	0	0	0	0	0	0	0	0	0	0	0	0	0									341	0	0	0	0	0	0	0	0	0	0	0	0	0	0	0	0	0	0	0
	342	0	0	0	0	0	0	0	0	0	0	0	0	0	0	0	0	0	0	0	0									342	0	0	0	0	0	0	0	0	0	0	0	0	0	0	0	0	0	0	0
	343	0	0	0	0	0	0	0	0	0	0	0	0	0	0	0	0	0	0	0	0									343	0	0	0	0	0	0	0	0	0	0	0	0	0	0	0	0	0	0	0
	344	0	0	0	0	0	0	0	0	0	0	0	0	0	0	0	0	0	0	0	0									344	0	0	0	0	0	0	0	0	0	0	0	0	0	0	0	0	0	0	0
	345	0	0	0	0	0	0	0	0	0	0	0	0	0	0	0	0	0	0	0	0									345	0	0	0	0	0	0	0	0	0	0	0	0	0	0	0	0	0	0	0
	346	0	0	0	0	0	0	0	0	0	0	0	0	0	0	0	0	0	0	0	0									346	0	0	0	0	0	0	0	0	0	0	0	0	0	0	0	0	0	0	0
	347	0	0	0	0	0	0	0	0	0	0	0	0	0	0	0	0	0	0	0	0									347	0	0	0	0	0	0	0	0	0	0	0	0	0	0	0	0	0	0	0
	348	0	0	0	0	0	0	0	0	0	0	0	0	0	0	0	0	0	0	0	0									348	0	0	0	0	0	0	0	0	0	0	0	0	0	0	0	0	0	0	0
	349	0	0	0	0	0	0	0	0	0	0	0	0	0	0	0	0	0	0	0	0									349	0	0	0	0	0	0	0	0	0	0	0	0	0	0	0	0	0	0	0
	350	0	0	0	0	0	0	0	0	0	0	0	0	0	0	0	0	0	0	0	0									350	0	0	0	0	0	0	0	0	0	0	0	0	0	0	0	0	0	0	0
	351	0	0	0	0	0	0	0	0	0	0	0	0	0	0	0	0	0	0	0	0									351	0	0	0	0	0	0	0	0	0	0	0	0	0	0	0	0	0	0	0
	352	0	0	0	0	0	0	0	0	0	0	0	0	0	0	0	0	0	0	0	0									352	0	0	0	0	0	0	0	0	0	0	0	0	0	0	0	0	0	0	0
	353	0	0	0	0	0	0	0	0	0	0	0	0	0	0	0	0	0	0	0	0									353	0	0	0	0	0	0	0	0	0	0	0	0	0	0	0	0	0	0	0
	354	0	0	0	0	0	0	0	0	0	0	0	0	0	0	0	0	0	0	0	0									354	0	0	0	0	0	0	0	0	0	0	0	0	0	0	0	0	0	0	0
	355	0	0	0	0	0	0	0	0	0	0	0	0	0	0	0	0	0	0	0	0									355	0	0	0	0	0	0	0	0	0	0	0	0	0	0	0	0	0	0	0
	356	0	0	0	0	0	0	0	0	0	0	0	0	0	0	0	0	0	0	0	0									356	0	0	0	0	0	0	0	0	0	0	0	0	0	0	0	0	0	0	0
	357	0	0	0	0	0	0	0	0	0	0	0	0	0	0	0	0	0	0	0	0									357	0	0	0	0	0	0	0	0	0	0	0	0	0	0	0	0	0	0	0
	358	0	0	0	0	0	0	0	0	0	0	0	0	0	0	0	0	0	0	0	0									358	0	0	0	0	0	0	0	0	0	0	0	0	0	0	0	0	0	0	0
	359	0	0	0	0	0	0	0	0	0	0	0	0	0	0	0	0	0	0	0	0									359	0	0	0	0	0	0	0	0	0	0	0	0	0	0	0	0	0	0	0
	360	0	0	0	0	0	0	0	0	0	0	0	0	0	0	0	0	0	0	0	0									360	0	0	0	0	0	0	0	0	0	0	0	0	0	0	0	0	0	0	0
	361	0	0	0	0	0	0	0	0	0	0	0	0	0	0	0	0	0	0	0	0									361	0	0	0	0	0	0	0	0	0	0	0	0	0	0	0	0	0	0	0
	362	0	0	0	0	0	0	0	0	0	0	0	0	0	0	0	0	0	0	0	0									362	0	0	0	0	0	0	0	0	0	0	0	0	0	0	0	0	0	0	0
	363	0	0	0	0	0	0	0	0	0	0	0	0	0	0	0	0	0	0	0	0									363	0	0	0	0	0	0	0	0	0	0	0	0	0	0	0	0	0	0	0
	364	0	0	0	0	0	0	0	0	0	0	0	0	0	0	0	0	0	0	0	0									364	0	0	0	0	0	0	0	0	0	0	0	0	0	0	0	0	0	0	0
	365	0	0	0	0	0	0	0	0	0	0	0	0	0	0	0	0	0	0	0	0									365	0	0	0	0	0	0	0	0	0	0	0	0	0	0	0	0	0	0	0
	366	0	0	0	0	0	0	0	0	0	0	0	0	0	0	0	0	0	0	0	0									366	0	0	0	0	0	0	0	0	0	0	0	0	0	0	0	0	0	0	0
	367	0	0	0	0	0	0	0	0	0	0	0	0	0	0	0	0	0	0	0	0									367	0	0	0	0	0	0	0	0	0	0	0	0	0	0	0	0	0	0	0
	368	0	0	0	0	0	0	0	0	0	0	0	0	0	0	0	0	0	0	0	0									368	0	0	0	0	0	0	0	0	0	0	0	0	0	0	0	0	0	0	0
	369	0	0	0	0	0	0	0	0	0	0	0	0	0	0	0	0	0	0	0	0									369	0	0	0	0	0	0	0	0	0	0	0	0	0	0	0	0	0	0	0
	370	0	0	0	0	0	0	0	0	0	0	0	0	0	0	0	0	0	0	0	0									370	0	0	0	0	0	0	0	0	0	0	0	0	0	0	0	0	0	0	0
	371	0	0	0	0	0	0	0	0	0	0	0	0	0	0	0	0	0	0	0	0									371	0	0	0	0	0	0	0	0	0	0	0	0	0	0	0	0	0	0	0
	372	0	0	0	0	0	0	0	0	0	0	0	0	0	0	0	0	0	0	0	0									372	0	0	0	0	0	0	0	0	0	0	0	0	0	0	0	0	0	0	0
	373	0	0	0	0	0	0	0	0	0	0	0	0	0	0	0	0	0	0	0	0									373	0	0	0	0	0	0	0	0	0	0	0	0	0	0	0	0	0	0	0
	374	0	0	0	0	0	0	0	0	0	0	0	0	0	0	0	0	0	0	0	0									374	0	0	0	0	0	0	0	0	0	0	0	0	0	0	0	0	0	0	0
	375	0	0	0	0	0	0	0	0	0	0	0	0	0	0	0	0	0	0	0	0									375	0	0	0	0	0	0	0	0	0	0	0	0	0	0	0	0	0	0	0
	376	0	0	0	0	0	0	0	0	0	0	0	0	0	0	0	0	0	0	0	0									376	0	0	0	0	0	0	0	0	0	0	0	0	0	0	0	0	0	0	0
	377	0	0	0	0	0	0	0	0	0	0	0	0	0	0	0	0	0	0	0	0									377	0	0	0	0	0	0	0	0	0	0	0	0	0	0	0	0	0	0	0
	378	0	0	0	0	0	0	0	0	0	0	0	0	0	0	0	0	0	0	0	0									378	0	0	0	0	0	0	0	0	0	0	0	0	0	0	0	0	0	0	0
	379	0	0	0	0	0	0	0	0	0	0	0	0	0	0	0	0	0	0	0	0									379	0	0	0	0	0	0	0	0	0	0	0	0	0	0	0	0	0	0	0
	380	0	0	0	0	0	0	0	0	0	0	0	0	0	0	0	0	0	0	0	0									380	0	0	0	0	0	0	0	0	0	0	0	0	0	0	0	0	0	0	0
	381	0	0	0	0	0	0	0	0	0	0	0	0	0	0	0	0	0	0	0	0									381	0	0	0	0	0	0	0	0	0	0	0	0	0	0	0	0	0	0	0
	382	0	0	0	0	0	0	0	0	0	0	0	0	0	0	0	0	0	0	0	0									382	0	0	0	0	0	0	0	0	0	0	0	0	0	0	0	0	0	0	0
	383	0	0	0	0	0	0	0	0	0	0	0	0	0	0	0	0	0	0	0	0									383	0	0	0	0	0	0	0	0	0	0	0	0	0	0	0	0	0	0	0
	384	0	0	0	0	0	0	0	0	0	0	0	0	0	0	0	0	0	0	0	0									384	0	0	0	0	0	0	0	0	0	0	0	0	0	0	0	0	0	0	0
	385	0	0	0	0	0	0	0	0	0	0	0	0	0	0	0	0	0	0	0	0									385	0	0	0	0	0	0	0	0	0	0	0	0	0	0	0	0	0	0	0
	386	0	0	0	0	0	0	0	0	0	0	0	0	0	0	0	0	0	0	0	0									386	0	0	0	0	0	0	0	0	0	0	0	0	0	0	0	0	0	0	0
	387	0	0	0	0	0	0	0	0	0	0	0	0	0	0	0	0	0	0	0	0									387	0	0	0	0	0	0	0	0	0	0	0	0	0	0	0	0	0	0	0
	388	0	0	0	0	0	0	0	0	0	0	0	0	0	0	0	0	0	0	0	0									388	0	0	0	0	0	0	0	0	0	0	0	0	0	0	0	0	0	0	0
	389	0	0	0	0	0	0	0	0	0	0	0	0	0	0	0	0	0	0	0	0									389	0	0	0	0	0	0	0	0	0	0	0	0	0	0	0	0	0	0	0
	390	0	0	0	0	0	0	0	0	0	0	0	0	0	0	0	0	0	0	0	0									390	0	0	0	0	0	0	0	0	0	0	0	0	0	0	0	0	0	0	0
	391	0	0	0	0	0	0	0	0	0	0	0	0	0	0	0	0	0	0	0	0									391	0	0	0	0	0	0	0	0	0	0	0	0	0	0	0	0	0	0	0
	392	0	0	0	0	0	0	0	0	0	0	0	0	0	0	0	0	0	0	0	0									392	0	0	0	0	0	0	0	0	0	0	0	0	0	0	0	0	0	0	0
	393	0	0	0	0	0	0	0	0	0	0	0	0	0	0	0	0	0	0	0	0									393	0	0	0	0	0	0	0	0	0	0	0	0	0	0	0	0	0	0	0
	394	0	0	0	0	0	0	0	0	0	0	0	0	0	0	0	0	0	0	0	0									394	0	0	0	0	0	0	0	0	0	0	0	0	0	0	0	0	0	0	0
	395	0	0	0	0	0	0	0	0	0	0	0	0	0	0	0	0	0	0	0	0									395	0	0	0	0	0	0	0	0	0	0	0	0	0	0	0	0	0	0	0
	396	0	0	0	0	0	0	0	0	0	0	0	0	0	0	0	0	0	0	0	0									396	0	0	0	0	0	0	0	0	0	0	0	0	0	0	0	0	0	0	0
	397	0	0	0	0	0	0	0	0	0	0	0	0	0	0	0	0	0	0	0	0									397	0	0	0	0	0	0	0	0	0	0	0	0	0	0	0	0	0	0	0
	398	0	0	0	0	0	0	0	0	0	0	0	0	0	0	0	0	0	0	0	0									398	0	0	0	0	0	0	0	0	0	0	0	0	0	0	0	0	0	0	0
	399	0	0	0	0	0	0	0	0	0	0	0	0	0	0	0	0	0	0	0	0									399	0	0	0	0	0	0	0	0	0	0	0	0	0	0	0	0	0	0	0
	400	0	0	0	0	0	0	0	0	0	0	0	0	0	0	0	0	0	0	0	0									400	0	0	0	0	0	0	0	0	0	0	0	0	0	0	0	0	0	0	0
	401	0	0	0	0	0	0	0	0	0	0	0	0	0	0	0	0	0	0	0	0									401	0	0	0	0	0	0	0	0	0	0	0	0	0	0	0	0	0	0	0
	402	0	0	0	0	0	0	0	0	0	0	0	0	0	0	0	0	0	0	0	0									402	0	0	0	0	0	0	0	0	0	0	0	0	0	0	0	0	0	0	0
	403	0	0	0	0	0	0	0	0	0	0	0	0	0	0	0	0	0	0	0	0									403	0	0	0	0	0	0	0	0	0	0	0	0	0	0	0	0	0	0	0
	404	0	0	0	0	0	0	0	0	0	0	0	0	0	0	0	0	0	0	0	0									404	0	0	0	0	0	0	0	0	0	0	0	0	0	0	0	0	0	0	0
	405	0	0	0	0	0	0	0	0	0	0	0	0	0	0	0	0	0	0	0	0									405	0	0	0	0	0	0	0	0	0	0	0	0	0	0	0	0	0	0	0
	406	0	0	0	0	0	0	0	0	0	0	0	0	0	0	0	0	0	0	0	0									406	0	0	0	0	0	0	0	0	0	0	0	0	0	0	0	0	0	0	0
	407	0	0	0	0	0	0	0	0	0	0	0	0	0	0	0	0	0	0	0	0									407	0	0	0	0	0	0	0	0	0	0	0	0	0	0	0	0	0	0	0
	408	0	0	0	0	0	0	0	0	0	0	0	0	0	0	0	0	0	0	0	0									408	0	0	0	0	0	0	0	0	0	0	0	0	0	0	0	0	0	0	0
	409	0	0	0	0	0	0	0	0	0	0	0	0	0	0	0	0	0	0	0	0									409	0	0	0	0	0	0	0	0	0	0	0	0	0	0	0	0	0	0	0
	410	0	0	0	0	0	0	0	0	0	0	0	0	0	0	0	0	0	0	0	0									410	0	0	0	0	0	0	0	0	0	0	0	0	0	0	0	0	0	0	0
	411	0	0	0	0	0	0	0	0	0	0	0	0	0	0	0	0	0	0	0	0									411	0	0	0	0	0	0	0	0	0	0	0	0	0	0	0	0	0	0	0
	412	0	0	0	0	0	0	0	0	0	0	0	0	0	0	0	0	0	0	0	0									412	0	0	0	0	0	0	0	0	0	0	0	0	0	0	0	0	0	0	0
	413	0	0	0	0	0	0	0	0	0	0	0	0	0	0	0	0	0	0	0	0									413	0	0	0	0	0	0	0	0	0	0	0	0	0	0	0	0	0	0	0
	414	0	0	0	0	0	0	0	0	0	0	0	0	0	0	0	0	0	0	0	0									414	0	0	0	0	0	0	0	0	0	0	0	0	0	0	0	0	0	0	0
	415	0	0	0	0	0	0	0	0	0	0	0	0	0	0	0	0	0	0	0	0									415	0	0	0	0	0	0	0	0	0	0	0	0	0	0	0	0	0	0	0
	416	0	0	0	0	0	0	0	0	0	0	0	0	0	0	0	0	0	0	0	0									416	0	0	0	0	0	0	0	0	0	0	0	0	0	0	0	0	0	0	0
	417	0	0	0	0	0	0	0	0	0	0	0	0	0	0	0	0	0	0	0	0									417	0	0	0	0	0	0	0	0	0	0	0	0	0	0	0	0	0	0	0
	418	0	0	0	0	0	0	0	0	0	0	0	0	0	0	0	0	0	0	0	0									418	0	0	0	0	0	0	0	0	0	0	0	0	0	0	0	0	0	0	0
	419	0	0	0	0	0	0	0	0	0	0	0	0	0	0	0	0	0	0	0	0									419	0	0	0	0	0	0	0	0	0	0	0	0	0	0	0	0	0	0	0
	420	0	0	0	0	0	0	0	0	0	0	0	0	0	0	0	0	0	0	0	0									420	0	0	0	0	0	0	0	0	0	0	0	0	0	0	0	0	0	0	0
	421	0	0	0	0	0	0	0	0	0	0	0	0	0	0	0	0	0	0	0	0									421	0	0	0	0	0	0	0	0	0	0	0	0	0	0	0	0	0	0	0
	422	0	0	0	0	0	0	0	0	0	0	0	0	0	0	0	0	0	0	0	0									422	0	0	0	0	0	0	0	0	0	0	0	0	0	0	0	0	0	0	0
	423	0	0	0	0	0	0	0	0	0	0	0	0	0	0	0	0	0	0	0	0									423	0	0	0	0	0	0	0	0	0	0	0	0	0	0	0	0	0	0	0
	424	0	0	0	0	0	0	0	0	0	0	0	0	0	0	0	0	0	0	0	0									424	0	0	0	0	0	0	0	0	0	0	0	0	0	0	0	0	0	0	0
	425	0	0	0	0	0	0	0	0	0	0	0	0	0	0	0	0	0	0	0	0									425	0	0	0	0	0	0	0	0	0	0	0	0	0	0	0	0	0	0	0
	426	0	0	0	0	0	0	0	0	0	0	0	0	0	0	0	0	0	0	0	0									426	0	0	0	0	0	0	0	0	0	0	0	0	0	0	0	0	0	0	0
	427	0	0	0	0	0	0	0	0	0	0	0	0	0	0	0	0	0	0	0	0									427	0	0	0	0	0	0	0	0	0	0	0	0	0	0	0	0	0	0	0
	428	0	0	0	0	0	0	0	0	0	0	0	0	0	0	0	0	0	0	0	0									428	0	0	0	0	0	0	0	0	0	0	0	0	0	0	0	0	0	0	0
	429	0	0	0	0	0	0	0	0	0	0	0	0	0	0	0	0	0	0	0	0									429	0	0	0	0	0	0	0	0	0	0	0	0	0	0	0	0	0	0	0
	430	0	0	0	0	0	0	0	0	0	0	0	0	0	0	0	0	0	0	0	0									430	0	0	0	0	0	0	0	0	0	0	0	0	0	0	0	0	0	0	0
	431	0	0	0	0	0	0	0	0	0	0	0	0	0	0	0	0	0	0	0	0									431	0	0	0	0	0	0	0	0	0	0	0	0	0	0	0	0	0	0	0
	432	0	0	0	0	0	0	0	0	0	0	0	0	0	0	0	0	0	0	0	0									432	0	0	0	0	0	0	0	0	0	0	0	0	0	0	0	0	0	0	0
	433	0	0	0	0	0	0	0	0	0	0	0	0	0	0	0	0	0	0	0	0									433	0	0	0	0	0	0	0	0	0	0	0	0	0	0	0	0	0	0	0
	434	0	0	0	0	0	0	0	0	0	0	0	0	0	0	0	0	0	0	0	0									434	0	0	0	0	0	0	0	0	0	0	0	0	0	0	0	0	0	0	0
	435	0	0	0	0	0	0	0	0	0	0	0	0	0	0	0	0	0	0	0	0									435	0	0	0	0	0	0	0	0	0	0	0	0	0	0	0	0	0	0	0
	436	0	0	0	0	0	0	0	0	0	0	0	0	0	0	0	0	0	0	0	0									436	0	0	0	0	0	0	0	0	0	0	0	0	0	0	0	0	0	0	0
	437	0	0	0	0	0	0	0	0	0	0	0	0	0	0	0	0	0	0	0	0									437	0	0	0	0	0	0	0	0	0	0	0	0	0	0	0	0	0	0	0
	438	0	0	0	0	0	0	0	0	0	0	0	0	0	0	0	0	0	0	0	0									438	0	0	0	0	0	0	0	0	0	0	0	0	0	0	0	0	0	0	0
	439	0	0	0	0	0	0	0	0	0	0	0	0	0	0	0	0	0	0	0	0									439	0	0	0	0	0	0	0	0	0	0	0	0	0	0	0	0	0	0	0
	440	0	0	0	0	0	0	0	0	0	0	0	0	0	0	0	0	0	0	0	0									440	0	0	0	0	0	0	0	0	0	0	0	0	0	0	0	0	0	0	0
	441	0	0	0	0	0	0	0	0	0	0	0	0	0	0	0	0	0	0	0	0									441	0	0	0	0	0	0	0	0	0	0	0	0	0	0	0	0	0	0	0
	442	0	0	0	0	0	0	0	0	0	0	0	0	0	0	0	0	0	0	0	0									442	0	0	0	0	0	0	0	0	0	0	0	0	0	0	0	0	0	0	0
	443	0	0	0	0	0	0	0	0	0	0	0	0	0	0	0	0	0	0	0	0									443	0	0	0	0	0	0	0	0	0	0	0	0	0	0	0	0	0	0	0
	444	0	0	0	0	0	0	0	0	0	0	0	0	0	0	0	0	0	0	0	0									444	0	0	0	0	0	0	0	0	0	0	0	0	0	0	0	0	0	0	0
	445	0	0	0	0	0	0	0	0	0	0	0	0	0	0	0	0	0	0	0	0									445	0	0	0	0	0	0	0	0	0	0	0	0	0	0	0	0	0	0	0
	446	0	0	0	0	0	0	0	0	0	0	0	0	0	0	0	0	0	0	0	0									446	0	0	0	0	0	0	0	0	0	0	0	0	0	0	0	0	0	0	0
	447	0	0	0	0	0	0	0	0	0	0	0	0	0	0	0	0	0	0	0	0									447	0	0	0	0	0	0	0	0	0	0	0	0	0	0	0	0	0	0	0
	448	0	0	0	0	0	0	0	0	0	0	0	0	0	0	0	0	0	0	0	0									448	0	0	0	0	0	0	0	0	0	0	0	0	0	0	0	0	0	0	0
	449	0	0	0	0	0	0	0	0	0	0	0	0	0	0	0	0	0	0	0	0									449	0	0	0	0	0	0	0	0	0	0	0	0	0	0	0	0	0	0	0
	450	0	0	0	0	0	0	0	0	0	0	0	0	0	0	0	0	0	0	0	0									450	0	0	0	0	0	0	0	0	0	0	0	0	0	0	0	0	0	0	0
	451	0	0	0	0	0	0	0	0	0	0	0	0	0	0	0	0	0	0	0	0									451	0	0	0	0	0	0	0	0	0	0	0	0	0	0	0	0	0	0	0
	452	0	0	0	0	0	0	0	0	0	0	0	0	0	0	0	0	0	0	0	0									452	0	0	0	0	0	0	0	0	0	0	0	0	0	0	0	0	0	0	0
	453	0	0	0	0	0	0	0	0	0	0	0	0	0	0	0	0	0	0	0	0									453	0	0	0	0	0	0	0	0	0	0	0	0	0	0	0	0	0	0	0
	454	0	0	0	0	0	0	0	0	0	0	0	0	0	0	0	0	0	0	0	0									454	0	0	0	0	0	0	0	0	0	0	0	0	0	0	0	0	0	0	0
	455	0	0	0	0	0	0	0	0	0	0	0	0	0	0	0	0	0	0	0	0									455	0	0	0	0	0	0	0	0	0	0	0	0	0	0	0	0	0	0	0
	456	0	0	0	0	0	0	0	0	0	0	0	0	0	0	0	0	0	0	0	0									456	0	0	0	0	0	0	0	0	0	0	0	0	0	0	0	0	0	0	0
	457	0	0	0	0	0	0	0	0	0	0	0	0	0	0	0	0	0	0	0	0									457	0	0	0	0	0	0	0	0	0	0	0	0	0	0	0	0	0	0	0
	458	0	0	0	0	0	0	0	0	0	0	0	0	0	0	0	0	0	0	0	0									458	0	0	0	0	0	0	0	0	0	0	0	0	0	0	0	0	0	0	0
	459	0	0	0	0	0	0	0	0	0	0	0	0	0	0	0	0	0	0	0	0									459	0	0	0	0	0	0	0	0	0	0	0	0	0	0	0	0	0	0	0
	460	0	0	0	0	0	0	0	0	0	0	0	0	0	0	0	0	0	0	0	0									460	0	0	0	0	0	0	0	0	0	0	0	0	0	0	0	0	0	0	0
	461	0	0	0	0	0	0	0	0	0	0	0	0	0	0	0	0	0	0	0	0									461	0	0	0	0	0	0	0	0	0	0	0	0	0	0	0	0	0	0	0
	462	0	0	0	0	0	0	0	0	0	0	0	0	0	0	0	0	0	0	0	0									462	0	0	0	0	0	0	0	0	0	0	0	0	0	0	0	0	0	0	0
	463	0	0	0	0	0	0	0	0	0	0	0	0	0	0	0	0	0	0	0	0									463	0	0	0	0	0	0	0	0	0	0	0	0	0	0	0	0	0	0	0
	464	0	0	0	0	0	0	0	0	0	0	0	0	0	0	0	0	0	0	0	0									464	0	0	0	0	0	0	0	0	0	0	0	0	0	0	0	0	0	0	0
	465	0	0	0	0	0	0	0	0	0	0	0	0	0	0	0	0	0	0	0	0									465	0	0	0	0	0	0	0	0	0	0	0	0	0	0	0	0	0	0	0
	466	0	0	0	0	0	0	0	0	0	0	0	0	0	0	0	0	0	0	0	0									466	0	0	0	0	0	0	0	0	0	0	0	0	0	0	0	0	0	0	0
	467	0	0	0	0	0	0	0	0	0	0	0	0	0	0	0	0	0	0	0	0									467	0	0	0	0	0	0	0	0	0	0	0	0	0	0	0	0	0	0	0
	468	0	0	0	0	0	0	0	0	0	0	0	0	0	0	0	0	0	0	0	0									468	0	0	0	0	0	0	0	0	0	0	0	0	0	0	0	0	0	0	0
	469	0	0	0	0	0	0	0	0	0	0	0	0	0	0	0	0	0	0	0	0									469	0	0	0	0	0	0	0	0	0	0	0	0	0	0	0	0	0	0	0
	470	0	0	0	0	0	0	0	0	0	0	0	0	0	0	0	0	0	0	0	0									470	0	0	0	0	0	0	0	0	0	0	0	0	0	0	0	0	0	0	0
	471	0	0	0	0	0	0	0	0	0	0	0	0	0	0	0	0	0	0	0	0									471	0	0	0	0	0	0	0	0	0	0	0	0	0	0	0	0	0	0	0
	472	0	0	0	0	0	0	0	0	0	0	0	0	0	0	0	0	0	0	0	0									472	0	0	0	0	0	0	0	0	0	0	0	0	0	0	0	0	0	0	0
	473	0	0	0	0	0	0	0	0	0	0	0	0	0	0	0	0	0	0	0	0									473	0	0	0	0	0	0	0	0	0	0	0	0	0	0	0	0	0	0	0
	474	0	0	0	0	0	0	0	0	0	0	0	0	0	0	0	0	0	0	0	0									474	0	0	0	0	0	0	0	0	0	0	0	0	0	0	0	0	0	0	0
	475	0	0	0	0	0	0	0	0	0	0	0	0	0	0	0	0	0	0	0	0									475	0	0	0	0	0	0	0	0	0	0	0	0	0	0	0	0	0	0	0
	476	0	0	0	0	0	0	0	0	0	0	0	0	0	0	0	0	0	0	0	0									476	0	0	0	0	0	0	0	0	0	0	0	0	0	0	0	0	0	0	0
	477	0	0	0	0	0	0	0	0	0	0	0	0	0	0	0	0	0	0	0	0									477	0	0	0	0	0	0	0	0	0	0	0	0	0	0	0	0	0	0	0
	478	0	0	0	0	0	0	0	0	0	0	0	0	0	0	0	0	0	0	0	0									478	0	0	0	0	0	0	0	0	0	0	0	0	0	0	0	0	0	0	0
	479	0	0	0	0	0	0	0	0	0	0	0	0	0	0	0	0	0	0	0	0									479	0	0	0	0	0	0	0	0	0	0	0	0	0	0	0	0	0	0	0
	480	0	0	0	0	0	0	0	0	0	0	0	0	0	0	0	0	0	0	0	0									480	0	0	0	0	0	0	0	0	0	0	0	0	0	0	0	0	0	0	0
	481	0	0	0	0	0	0	0	0	0	0	0	0	0	0	0	0	0	0	0	0									481	0	0	0	0	0	0	0	0	0	0	0	0	0	0	0	0	0	0	0
	482	0	0	0	0	0	0	0	0	0	0	0	0	0	0	0	0	0	0	0	0									482	0	0	0	0	0	0	0	0	0	0	0	0	0	0	0	0	0	0	0
	483	0	0	0	0	0	0	0	0	0	0	0	0	0	0	0	0	0	0	0	0									483	0	0	0	0	0	0	0	0	0	0	0	0	0	0	0	0	0	0	0
	484	0	0	0	0	0	0	0	0	0	0	0	0	0	0	0	0	0	0	0	0									484	0	0	0	0	0	0	0	0	0	0	0	0	0	0	0	0	0	0	0
	485	0	0	0	0	0	0	0	0	0	0	0	0	0	0	0	0	0	0	0	0									485	0	0	0	0	0	0	0	0	0	0	0	0	0	0	0	0	0	0	0
	486	0	0	0	0	0	0	0	0	0	0	0	0	0	0	0	0	0	0	0	0									486	0	0	0	0	0	0	0	0	0	0	0	0	0	0	0	0	0	0	0
	487	0	0	0	0	0	0	0	0	0	0	0	0	0	0	0	0	0	0	0	0									487	0	0	0	0	0	0	0	0	0	0	0	0	0	0	0	0	0	0	0
	488	0	0	0	0	0	0	0	0	0	0	0	0	0	0	0	0	0	0	0	0									488	0	0	0	0	0	0	0	0	0	0	0	0	0	0	0	0	0	0	0
	489	0	0	0	0	0	0	0	0	0	0	0	0	0	0	0	0	0	0	0	0									489	0	0	0	0	0	0	0	0	0	0	0	0	0	0	0	0	0	0	0
	490	0	0	0	0	0	0	0	0	0	0	0	0	0	0	0	0	0	0	0	0									490	0	0	0	0	0	0	0	0	0	0	0	0	0	0	0	0	0	0	0
	491	0	0	0	0	0	0	0	0	0	0	0	0	0	0	0	0	0	0	0	0									491	0	0	0	0	0	0	0	0	0	0	0	0	0	0	0	0	0	0	0
	492	0	0	0	0	0	0	0	0	0	0	0	0	0	0	0	0	0	0	0	0									492	0	0	0	0	0	0	0	0	0	0	0	0	0	0	0	0	0	0	0
	493	0	0	0	0	0	0	0	0	0	0	0	0	0	0	0	0	0	0	0	0									493	0	0	0	0	0	0	0	0	0	0	0	0	0	0	0	0	0	0	0
	494	0	0	0	0	0	0	0	0	0	0	0	0	0	0	0	0	0	0	0	0									494	0	0	0	0	0	0	0	0	0	0	0	0	0	0	0	0	0	0	0
	495	0	0	0	0	0	0	0	0	0	0	0	0	0	0	0	0	0	0	0	0									495	0	0	0	0	0	0	0	0	0	0	0	0	0	0	0	0	0	0	0
	496	0	0	0	0	0	0	0	0	0	0	0	0	0	0	0	0	0	0	0	0									496	0	0	0	0	0	0	0	0	0	0	0	0	0	0	0	0	0	0	0
	497	0	0	0	0	0	0	0	0	0	0	0	0	0	0	0	0	0	0	0	0									497	0	0	0	0	0	0	0	0	0	0	0	0	0	0	0	0	0	0	0
	498	0	0	0	0	0	0	0	0	0	0	0	0	0	0	0	0	0	0	0	0									498	0	0	0	0	0	0	0	0	0	0	0	0	0	0	0	0	0	0	0
	499	0	0	0	0	0	0	0	0	0	0	0	0	0	0	0	0	0	0	0	0									499	0	0	0	0	0	0	0	0	0	0	0	0	0	0	0	0	0	0	0
	500	0	0	0	0	0	0	0	0	0	0	0	0	0	0	0	0	0	0	0	0									500	0	0	0	0	0	0	0	0	0	0	0	0	0	0	0	0	0	0	0
	501	0	0	0	0	0	0	0	0	0	0	0	0	0	0	0	0	0	0	0	0									501	0	0	0	0	0	0	0	0	0	0	0	0	0	0	0	0	0	0	0
	502	0	0	0	0	0	0	0	0	0	0	0	0	0	0	0	0	0	0	0	0									502	0	0	0	0	0	0	0	0	0	0	0	0	0	0	0	0	0	0	0
	503	0	0	0	0	0	0	0	0	0	0	0	0	0	0	0	0	0	0	0	0									503	0	0	0	0	0	0	0	0	0	0	0	0	0	0	0	0	0	0	0
	504	0	0	0	0	0	0	0	0	0	0	0	0	0	0	0	0	0	0	0	0									504	0	0	0	0	0	0	0	0	0	0	0	0	0	0	0	0	0	0	0
	505	0	0	0	0	0	0	0	0	0	0	0	0	0	0	0	0	0	0	0	0									505	0	0	0	0	0	0	0	0	0	0	0	0	0	0	0	0	0	0	0
	506	0	0	0	0	0	0	0	0	0	0	0	0	0	0	0	0	0	0	0	0									506	0	0	0	0	0	0	0	0	0	0	0	0	0	0	0	0	0	0	0
	507	0	0	0	0	0	0	0	0	0	0	0	0	0	0	0	0	0	0	0	0									507	0	0	0	0	0	0	0	0	0	0	0	0	0	0	0	0	0	0	0
	508	0	0	0	0	0	0	0	0	0	0	0	0	0	0	0	0	0	0	0	0									508	0	0	0	0	0	0	0	0	0	0	0	0	0	0	0	0	0	0	0
	509	0	0	0	0	0	0	0	0	0	0	0	0	0	0	0	0	0	0	0	0									509	0	0	0	0	0	0	0	0	0	0	0	0	0	0	0	0	0	0	0
	510	0	0	0	0	0	0	0	0	0	0	0	0	0	0	0	0	0	0	0	0									510	0	0	0	0	0	0	0	0	0	0	0	0	0	0	0	0	0	0	0
	511	0	0	0	0	0	0	0	0	0	0	0	0	0	0	0	0	0	0	0	0									511	0	0	0	0	0	0	0	0	0	0	0	0	0	0	0	0	0	0	0
	512	0	0	0	0	0	0	0	0	0	0	0	0	0	0	0	0	0	0	0	0									512	0	0	0	0	0	0	0	0	0	0	0	0	0	0	0	0	0	0	0
	513	0	0	0	0	0	0	0	0	0	0	0	0	0	0	0	0	0	0	0	0									513	0	0	0	0	0	0	0	0	0	0	0	0	0	0	0	0	0	0	0
	514	0	0	0	0	0	0	0	0	0	0	0	0	0	0	0	0	0	0	0	0									514	0	0	0	0	0	0	0	0	0	0	0	0	0	0	0	0	0	0	0
	515	0	0	0	0	0	0	0	0	0	0	0	0	0	0	0	0	0	0	0	0									515	0	0	0	0	0	0	0	0	0	0	0	0	0	0	0	0	0	0	0
	516	0	0	0	0	0	0	0	0	0	0	0	0	0	0	0	0	0	0	0	0									516	0	0	0	0	0	0	0	0	0	0	0	0	0	0	0	0	0	0	0
	517	0	0	0	0	0	0	0	0	0	0	0	0	0	0	0	0	0	0	0	0									517	0	0	0	0	0	0	0	0	0	0	0	0	0	0	0	0	0	0	0
	518	0	0	0	0	0	0	0	0	0	0	0	0	0	0	0	0	0	0	0	0									518	0	0	0	0	0	0	0	0	0	0	0	0	0	0	0	0	0	0	0
	519	0	0	0	0	0	0	0	0	0	0	0	0	0	0	0	0	0	0	0	0									519	0	0	0	0	0	0	0	0	0	0	0	0	0	0	0	0	0	0	0
	520	0	0	0	0	0	0	0	0	0	0	0	0	0	0	0	0	0	0	0	0									520	0	0	0	0	0	0	0	0	0	0	0	0	0	0	0	0	0	0	0
	521	0	0	0	0	0	0	0	0	0	0	0	0	0	0	0	0	0	0	0	0									521	0	0	0	0	0	0	0	0	0	0	0	0	0	0	0	0	0	0	0
	522	0	0	0	0	0	0	0	0	0	0	0	0	0	0	0	0	0	0	0	0									522	0	0	0	0	0	0	0	0	0	0	0	0	0	0	0	0	0	0	0
	523	0	0	0	0	0	0	0	0	0	0	0	0	0	0	0	0	0	0	0	0									523	0	0	0	0	0	0	0	0	0	0	0	0	0	0	0	0	0	0	0
	524	0	0	0	0	0	0	0	0	0	0	0	0	0	0	0	0	0	0	0	0									524	0	0	0	0	0	0	0	0	0	0	0	0	0	0	0	0	0	0	0
	525	0	0	0	0	0	0	0	0	0	0	0	0	0	0	0	0	0	0	0	0									525	0	0	0	0	0	0	0	0	0	0	0	0	0	0	0	0	0	0	0
	526	0	0	0	0	0	0	0	0	0	0	0	0	0	0	0	0	0	0	0	0									526	0	0	0	0	0	0	0	0	0	0	0	0	0	0	0	0	0	0	0
	527	0	0	0	0	0	0	0	0	0	0	0	0	0	0	0	0	0	0	0	0									527	0	0	0	0	0	0	0	0	0	0	0	0	0	0	0	0	0	0	0
	528	0	0	0	0	0	0	0	0	0	0	0	0	0	0	0	0	0	0	0	0									528	0	0	0	0	0	0	0	0	0	0	0	0	0	0	0	0	0	0	0
	529	0	0	0	0	0	0	0	0	0	0	0	0	0	0	0	0	0	0	0	0									529	0	0	0	0	0	0	0	0	0	0	0	0	0	0	0	0	0	0	0
	530	0	0	0	0	0	0	0	0	0	0	0	0	0	0	0	0	0	0	0	0									530	0	0	0	0	0	0	0	0	0	0	0	0	0	0	0	0	0	0	0
	531	0	0	0	0	0	0	0	0	0	0	0	0	0	0	0	0	0	0	0	0									531	0	0	0	0	0	0	0	0	0	0	0	0	0	0	0	0	0	0	0
	532	0	0	0	0	0	0	0	0	0	0	0	0	0	0	0	0	0	0	0	0									532	0	0	0	0	0	0	0	0	0	0	0	0	0	0	0	0	0	0	0
	533	0	0	0	0	0	0	0	0	0	0	0	0	0	0	0	0	0	0	0	0									533	0	0	0	0	0	0	0	0	0	0	0	0	0	0	0	0	0	0	0
	534	0	0	0	0	0	0	0	0	0	0	0	0	0	0	0	0	0	0	0	0									534	0	0	0	0	0	0	0	0	0	0	0	0	0	0	0	0	0	0	0
	535	0	0	0	0	0	0	0	0	0	0	0	0	0	0	0	0	0	0	0	0									535	0	0	0	0	0	0	0	0	0	0	0	0	0	0	0	0	0	0	0
	536	0	0	0	0	0	0	0	0	0	0	0	0	0	0	0	0	0	0	0	0									536	0	0	0	0	0	0	0	0	0	0	0	0	0	0	0	0	0	0	0
	537	0	0	0	0	0	0	0	0	0	0	0	0	0	0	0	0	0	0	0	0									537	0	0	0	0	0	0	0	0	0	0	0	0	0	0	0	0	0	0	0
	538	0	0	0	0	0	0	0	0	0	0	0	0	0	0	0	0	0	0	0	0									538	0	0	0	0	0	0	0	0	0	0	0	0	0	0	0	0	0	0	0
	539	0	0	0	0	0	0	0	0	0	0	0	0	0	0	0	0	0	0	0	0									539	0	0	0	0	0	0	0	0	0	0	0	0	0	0	0	0	0	0	0
	540	0	0	0	0	0	0	0	0	0	0	0	0	0	0	0	0	0	0	0	0									540	0	0	0	0	0	0	0	0	0	0	0	0	0	0	0	0	0	0	0
	541	0	0	0	0	0	0	0	0	0	0	0	0	0	0	0	0	0	0	0	0									541	0	0	0	0	0	0	0	0	0	0	0	0	0	0	0	0	0	0	0
	542	0	0	0	0	0	0	0	0	0	0	0	0	0	0	0	0	0	0	0	0									542	0	0	0	0	0	0	0	0	0	0	0	0	0	0	0	0	0	0	0
	543	0	0	0	0	0	0	0	0	0	0	0	0	0	0	0	0	0	0	0	0									543	0	0	0	0	0	0	0	0	0	0	0	0	0	0	0	0	0	0	0
	544	0	0	0	0	0	0	0	0	0	0	0	0	0	0	0	0	0	0	0	0									544	0	0	0	0	0	0	0	0	0	0	0	0	0	0	0	0	0	0	0
	545	0	0	0	0	0	0	0	0	0	0	0	0	0	0	0	0	0	0	0	0									545	0	0	0	0	0	0	0	0	0	0	0	0	0	0	0	0	0	0	0
	546	0	0	0	0	0	0	0	0	0	0	0	0	0	0	0	0	0	0	0	0									546	0	0	0	0	0	0	0	0	0	0	0	0	0	0	0	0	0	0	0
	547	0	0	0	0	0	0	0	0	0	0	0	0	0	0	0	0	0	0	0	0									547	0	0	0	0	0	0	0	0	0	0	0	0	0	0	0	0	0	0	0
	548	0	0	0	0	0	0	0	0	0	0	0	0	0	0	0	0	0	0	0	0									548	0	0	0	0	0	0	0	0	0	0	0	0	0	0	0	0	0	0	0
	549	0	0	0	0	0	0	0	0	0	0	0	0	0	0	0	0	0	0	0	0									549	0	0	0	0	0	0	0	0	0	0	0	0	0	0	0	0	0	0	0
	550	0	0	0	0	0	0	0	0	0	0	0	0	0	0	0	0	0	0	0	0									550	0	0	0	0	0	0	0	0	0	0	0	0	0	0	0	0	0	0	0
	551	0	0	0	0	0	0	0	0	0	0	0	0	0	0	0	0	0	0	0	0									551	0	0	0	0	0	0	0	0	0	0	0	0	0	0	0	0	0	0	0
	552	0	0	0	0	0	0	0	0	0	0	0	0	0	0	0	0	0	0	0	0									552	0	0	0	0	0	0	0	0	0	0	0	0	0	0	0	0	0	0	0
	553	0	0	0	0	0	0	0	0	0	0	0	0	0	0	0	0	0	0	0	0									553	0	0	0	0	0	0	0	0	0	0	0	0	0	0	0	0	0	0	0
	554	0	0	0	0	0	0	0	0	0	0	0	0	0	0	0	0	0	0	0	0									554	0	0	0	0	0	0	0	0	0	0	0	0	0	0	0	0	0	0	0
	555	0	0	0	0	0	0	0	0	0	0	0	0	0	0	0	0	0	0	0	0									555	0	0	0	0	0	0	0	0	0	0	0	0	0	0	0	0	0	0	0
	556	0	0	0	0	0	0	0	0	0	0	0	0	0	0	0	0	0	0	0	0									556	0	0	0	0	0	0	0	0	0	0	0	0	0	0	0	0	0	0	0
	557	0	0	0	0	0	0	0	0	0	0	0	0	0	0	0	0	0	0	0	0									557	0	0	0	0	0	0	0	0	0	0	0	0	0	0	0	0	0	0	0
	558	0	0	0	0	0	0	0	0	0	0	0	0	0	0	0	0	0	0	0	0									558	0	0	0	0	0	0	0	0	0	0	0	0	0	0	0	0	0	0	0
	559	0	0	0	0	0	0	0	0	0	0	0	0	0	0	0	0	0	0	0	0									559	0	0	0	0	0	0	0	0	0	0	0	0	0	0	0	0	0	0	0
	560	0	0	0	0	0	0	0	0	0	0	0	0	0	0	0	0	0	0	0	0									560	0	0	0	0	0	0	0	0	0	0	0	0	0	0	0	0	0	0	0
	561	0	0	0	0	0	0	0	0	0	0	0	0	0	0	0	0	0	0	0	0									561	0	0	0	0	0	0	0	0	0	0	0	0	0	0	0	0	0	0	0
	562	0	0	0	0	0	0	0	0	0	0	0	0	0	0	0	0	0	0	0	0									562	0	0	0	0	0	0	0	0	0	0	0	0	0	0	0	0	0	0	0
	563	0	0	0	0	0	0	0	0	0	0	0	0	0	0	0	0	0	0	0	0									563	0	0	0	0	0	0	0	0	0	0	0	0	0	0	0	0	0	0	0
	564	0	0	0	0	0	0	0	0	0	0	0	0	0	0	0	0	0	0	0	0									564	0	0	0	0	0	0	0	0	0	0	0	0	0	0	0	0	0	0	0
	565	0	0	0	0	0	0	0	0	0	0	0	0	0	0	0	0	0	0	0	0									565	0	0	0	0	0	0	0	0	0	0	0	0	0	0	0	0	0	0	0
	566	0	0	0	0	0	0	0	0	0	0	0	0	0	0	0	0	0	0	0	0									566	0	0	0	0	0	0	0	0	0	0	0	0	0	0	0	0	0	0	0
	567	0	0	0	0	0	0	0	0	0	0	0	0	0	0	0	0	0	0	0	0									567	0	0	0	0	0	0	0	0	0	0	0	0	0	0	0	0	0	0	0
	568	0	0	0	0	0	0	0	0	0	0	0	0	0	0	0	0	0	0	0	0									568	0	0	0	0	0	0	0	0	0	0	0	0	0	0	0	0	0	0	0
	569	0	0	0	0	0	0	0	0	0	0	0	0	0	0	0	0	0	0	0	0									569	0	0	0	0	0	0	0	0	0	0	0	0	0	0	0	0	0	0	0
	570	0	0	0	0	0	0	0	0	0	0	0	0	0	0	0	0	0	0	0	0									570	0	0	0	0	0	0	0	0	0	0	0	0	0	0	0	0	0	0	0
	571	0	0	0	0	0	0	0	0	0	0	0	0	0	0	0	0	0	0	0	0									571	0	0	0	0	0	0	0	0	0	0	0	0	0	0	0	0	0	0	0
	572	0	0	0	0	0	0	0	0	0	0	0	0	0	0	0	0	0	0	0	0									572	0	0	0	0	0	0	0	0	0	0	0	0	0	0	0	0	0	0	0
	573	0	0	0	0	0	0	0	0	0	0	0	0	0	0	0	0	0	0	0	0									573	0	0	0	0	0	0	0	0	0	0	0	0	0	0	0	0	0	0	0
	574	0	0	0	0	0	0	0	0	0	0	0	0	0	0	0	0	0	0	0	0									574	0	0	0	0	0	0	0	0	0	0	0	0	0	0	0	0	0	0	0
	575	0	0	0	0	0	0	0	0	0	0	0	0	0	0	0	0	0	0	0	0									575	0	0	0	0	0	0	0	0	0	0	0	0	0	0	0	0	0	0	0
	576	0	0	0	0	0	0	0	0	0	0	0	0	0	0	0	0	0	0	0	0									576	0	0	0	0	0	0	0	0	0	0	0	0	0	0	0	0	0	0	0
	577	0	0	0	0	0	0	0	0	0	0	0	0	0	0	0	0	0	0	0	0									577	0	0	0	0	0	0	0	0	0	0	0	0	0	0	0	0	0	0	0
	578	0	0	0	0	0	0	0	0	0	0	0	0	0	0	0	0	0	0	0	0									578	0	0	0	0	0	0	0	0	0	0	0	0	0	0	0	0	0	0	0
	579	0	0	0	0	0	0	0	0	0	0	0	0	0	0	0	0	0	0	0	0									579	0	0	0	0	0	0	0	0	0	0	0	0	0	0	0	0	0	0	0
	580	0	0	0	0	0	0	0	0	0	0	0	0	0	0	0	0	0	0	0	0									580	0	0	0	0	0	0	0	0	0	0	0	0	0	0	0	0	0	0	0
	581	0	0	0	0	0	0	0	0	0	0	0	0	0	0	0	0	0	0	0	0									581	0	0	0	0	0	0	0	0	0	0	0	0	0	0	0	0	0	0	0
	582	0	0	0	0	0	0	0	0	0	0	0	0	0	0	0	0	0	0	0	0									582	0	0	0	0	0	0	0	0	0	0	0	0	0	0	0	0	0	0	0
	583	0	0	0	0	0	0	0	0	0	0	0	0	0	0	0	0	0	0	0	0									583	0	0	0	0	0	0	0	0	0	0	0	0	0	0	0	0	0	0	0
	584	0	0	0	0	0	0	0	0	0	0	0	0	0	0	0	0	0	0	0	0									584	0	0	0	0	0	0	0	0	0	0	0	0	0	0	0	0	0	0	0
	585	0	0	0	0	0	0	0	0	0	0	0	0	0	0	0	0	0	0	0	0									585	0	0	0	0	0	0	0	0	0	0	0	0	0	0	0	0	0	0	0
	586	0	0	0	0	0	0	0	0	0	0	0	0	0	0	0	0	0	0	0	0									586	0	0	0	0	0	0	0	0	0	0	0	0	0	0	0	0	0	0	0
	587	0	0	0	0	0	0	0	0	0	0	0	0	0	0	0	0	0	0	0	0									587	0	0	0	0	0	0	0	0	0	0	0	0	0	0	0	0	0	0	0
	588	0	0	0	0	0	0	0	0	0	0	0	0	0	0	0	0	0	0	0	0									588	0	0	0	0	0	0	0	0	0	0	0	0	0	0	0	0	0	0	0
	589	0	0	0	0	0	0	0	0	0	0	0	0	0	0	0	0	0	0	0	0									589	0	0	0	0	0	0	0	0	0	0	0	0	0	0	0	0	0	0	0
	590	0	0	0	0	0	0	0	0	0	0	0	0	0	0	0	0	0	0	0	0									590	0	0	0	0	0	0	0	0	0	0	0	0	0	0	0	0	0	0	0
	591	0	0	0	0	0	0	0	0	0	0	0	0	0	0	0	0	0	0	0	0									591	0	0	0	0	0	0	0	0	0	0	0	0	0	0	0	0	0	0	0
	592	0	0	0	0	0	0	0	0	0	0	0	0	0	0	0	0	0	0	0	0									592	0	0	0	0	0	0	0	0	0	0	0	0	0	0	0	0	0	0	0
	593	0	0	0	0	0	0	0	0	0	0	0	0	0	0	0	0	0	0	0	0									593	0	0	0	0	0	0	0	0	0	0	0	0	0	0	0	0	0	0	0
	594	0	0	0	0	0	0	0	0	0	0	0	0	0	0	0	0	0	0	0	0									594	0	0	0	0	0	0	0	0	0	0	0	0	0	0	0	0	0	0	0
	595	0	0	0	0	0	0	0	0	0	0	0	0	0	0	0	0	0	0	0	0									595	0	0	0	0	0	0	0	0	0	0	0	0	0	0	0	0	0	0	0
	596	0	0	0	0	0	0	0	0	0	0	0	0	0	0	0	0	0	0	0	0									596	0	0	0	0	0	0	0	0	0	0	0	0	0	0	0	0	0	0	0
	597	0	0	0	0	0	0	0	0	0	0	0	0	0	0	0	0	0	0	0	0									597	0	0	0	0	0	0	0	0	0	0	0	0	0	0	0	0	0	0	0
	598	0	0	0	0	0	0	0	0	0	0	0	0	0	0	0	0	0	0	0	0									598	0	0	0	0	0	0	0	0	0	0	0	0	0	0	0	0	0	0	0
	599	0	0	0	0	0	0	0	0	0	0	0	0	0	0	0	0	0	0	0	0									599	0	0	0	0	0	0	0	0	0	0	0	0	0	0	0	0	0	0	0
	600	0	0	0	0	0	0	0	0	0	0	0	0	0	0	0	0	0	0	0	0									600	0	0	0	0	0	0	0	0	0	0	0	0	0	0	0	0	0	0	0
	601	0	0	0	0	0	0	0	0	0	0	0	0	0	0	0	0	0	0	0	0									601	0	0	0	0	0	0	0	0	0	0	0	0	0	0	0	0	0	0	0
	602	0	0	0	0	0	0	0	0	0	0	0	0	0	0	0	0	0	0	0	0									602	0	0	0	0	0	0	0	0	0	0	0	0	0	0	0	0	0	0	0
	603	0	0	0	0	0	0	0	0	0	0	0	0	0	0	0	0	0	0	0	0									603	0	0	0	0	0	0	0	0	0	0	0	0	0	0	0	0	0	0	0
	604	0	0	0	0	0	0	0	0	0	0	0	0	0	0	0	0	0	0	0	0									604	0	0	0	0	0	0	0	0	0	0	0	0	0	0	0	0	0	0	0
	605	0	0	0	0	0	0	0	0	0	0	0	0	0	0	0	0	0	0	0	0									605	0	0	0	0	0	0	0	0	0	0	0	0	0	0	0	0	0	0	0
	606	0	0	0	0	0	0	0	0	0	0	0	0	0	0	0	0	0	0	0	0									606	0	0	0	0	0	0	0	0	0	0	0	0	0	0	0	0	0	0	0
	607	0	0	0	0	0	0	0	0	0	0	0	0	0	0	0	0	0	0	0	0									607	0	0	0	0	0	0	0	0	0	0	0	0	0	0	0	0	0	0	0
	608	0	0	0	0	0	0	0	0	0	0	0	0	0	0	0	0	0	0	0	0									608	0	0	0	0	0	0	0	0	0	0	0	0	0	0	0	0	0	0	0
	609	0	0	0	0	0	0	0	0	0	0	0	0	0	0	0	0	0	0	0	0									609	0	0	0	0	0	0	0	0	0	0	0	0	0	0	0	0	0	0	0
	610	0	0	0	0	0	0	0	0	0	0	0	0	0	0	0	0	0	0	0	0									610	0	0	0	0	0	0	0	0	0	0	0	0	0	0	0	0	0	0	0
	611	0	0	0	0	0	0	0	0	0	0	0	0	0	0	0	0	0	0	0	0									611	0	0	0	0	0	0	0	0	0	0	0	0	0	0	0	0	0	0	0
	612	0	0	0	0	0	0	0	0	0	0	0	0	0	0	0	0	0	0	0	0									612	0	0	0	0	0	0	0	0	0	0	0	0	0	0	0	0	0	0	0
	613	0	0	0	0	0	0	0	0	0	0	0	0	0	0	0	0	0	0	0	0									613	0	0	0	0	0	0	0	0	0	0	0	0	0	0	0	0	0	0	0
	614	0	0	0	0	0	0	0	0	0	0	0	0	0	0	0	0	0	0	0	0									614	0	0	0	0	0	0	0	0	0	0	0	0	0	0	0	0	0	0	0
	615	0	0	0	0	0	0	0	0	0	0	0	0	0	0	0	0	0	0	0	0									615	0	0	0	0	0	0	0	0	0	0	0	0	0	0	0	0	0	0	0
	616	0	0	0	0	0	0	0	0	0	0	0	0	0	0	0	0	0	0	0	0									616	0	0	0	0	0	0	0	0	0	0	0	0	0	0	0	0	0	0	0
	617	0	0	0	0	0	0	0	0	0	0	0	0	0	0	0	0	0	0	0	0									617	0	0	0	0	0	0	0	0	0	0	0	0	0	0	0	0	0	0	0
	618	0	0	0	0	0	0	0	0	0	0	0	0	0	0	0	0	0	0	0	0									618	0	0	0	0	0	0	0	0	0	0	0	0	0	0	0	0	0	0	0
	619	0	0	0	0	0	0	0	0	0	0	0	0	0	0	0	0	0	0	0	0									619	0	0	0	0	0	0	0	0	0	0	0	0	0	0	0	0	0	0	0
	620	0	0	0	0	0	0	0	0	0	0	0	0	0	0	0	0	0	0	0	0									620	0	0	0	0	0	0	0	0	0	0	0	0	0	0	0	0	0	0	0
	621	0	0	0	0	0	0	0	0	0	0	0	0	0	0	0	0	0	0	0	0									621	0	0	0	0	0	0	0	0	0	0	0	0	0	0	0	0	0	0	0
	622	0	0	0	0	0	0	0	0	0	0	0	0	0	0	0	0	0	0	0	0									622	0	0	0	0	0	0	0	0	0	0	0	0	0	0	0	0	0	0	0
	623	0	0	0	0	0	0	0	0	0	0	0	0	0	0	0	0	0	0	0	0									623	0	0	0	0	0	0	0	0	0	0	0	0	0	0	0	0	0	0	0
	624	0	0	0	0	0	0	0	0	0	0	0	0	0	0	0	0	0	0	0	0									624	0	0	0	0	0	0	0	0	0	0	0	0	0	0	0	0	0	0	0
	625	0	0	0	0	0	0	0	0	0	0	0	0	0	0	0	0	0	0	0	0									625	0	0	0	0	0	0	0	0	0	0	0	0	0	0	0	0	0	0	0
	626	0	0	0	0	0	0	0	0	0	0	0	0	0	0	0	0	0	0	0	0									626	0	0	0	0	0	0	0	0	0	0	0	0	0	0	0	0	0	0	0
	627	0	0	0	0	0	0	0	0	0	0	0	0	0	0	0	0	0	0	0	0									627	0	0	0	0	0	0	0	0	0	0	0	0	0	0	0	0	0	0	0
	628	0	0	0	0	0	0	0	0	0	0	0	0	0	0	0	0	0	0	0	0									628	0	0	0	0	0	0	0	0	0	0	0	0	0	0	0	0	0	0	0
	629	0	0	0	0	0	0	0	0	0	0	0	0	0	0	0	0	0	0	0	0									629	0	0	0	0	0	0	0	0	0	0	0	0	0	0	0	0	0	0	0
	630	0	0	0	0	0	0	0	0	0	0	0	0	0	0	0	0	0	0	0	0									630	0	0	0	0	0	0	0	0	0	0	0	0	0	0	0	0	0	0	0
	631	0	0	0	0	0	0	0	0	0	0	0	0	0	0	0	0	0	0	0	0									631	0	0	0	0	0	0	0	0	0	0	0	0	0	0	0	0	0	0	0
	632	0	0	0	0	0	0	0	0	0	0	0	0	0	0	0	0	0	0	0	0									632	0	0	0	0	0	0	0	0	0	0	0	0	0	0	0	0	0	0	0
	633	0	0	0	0	0	0	0	0	0	0	0	0	0	0	0	0	0	0	0	0									633	0	0	0	0	0	0	0	0	0	0	0	0	0	0	0	0	0	0	0
	634	0	0	0	0	0	0	0	0	0	0	0	0	0	0	0	0	0	0	0	0									634	0	0	0	0	0	0	0	0	0	0	0	0	0	0	0	0	0	0	0
	635	0	0	0	0	0	0	0	0	0	0	0	0	0	0	0	0	0	0	0	0									635	0	0	0	0	0	0	0	0	0	0	0	0	0	0	0	0	0	0	0
	636	0	0	0	0	0	0	0	0	0	0	0	0	0	0	0	0	0	0	0	0									636	0	0	0	0	0	0	0	0	0	0	0	0	0	0	0	0	0	0	0
	637	0	0	0	0	0	0	0	0	0	0	0	0	0	0	0	0	0	0	0	0									637	0	0	0	0	0	0	0	0	0	0	0	0	0	0	0	0	0	0	0
	638	0	0	0	0	0	0	0	0	0	0	0	0	0	0	0	0	0	0	0	0									638	0	0	0	0	0	0	0	0	0	0	0	0	0	0	0	0	0	0	0
	639	0	0	0	0	0	0	0	0	0	0	0	0	0	0	0	0	0	0	0	0									639	0	0	0	0	0	0	0	0	0	0	0	0	0	0	0	0	0	0	0
	640	0	0	0	0	0	0	0	0	0	0	0	0	0	0	0	0	0	0	0	0									640	0	0	0	0	0	0	0	0	0	0	0	0	0	0	0	0	0	0	0
	641	0	0	0	0	0	0	0	0	0	0	0	0	0	0	0	0	0	0	0	0									641	0	0	0	0	0	0	0	0	0	0	0	0	0	0	0	0	0	0	0
	642	0	0	0	0	0	0	0	0	0	0	0	0	0	0	0	0	0	0	0	0									642	0	0	0	0	0	0	0	0	0	0	0	0	0	0	0	0	0	0	0
	643	0	0	0	0	0	0	0	0	0	0	0	0	0	0	0	0	0	0	0	0									643	0	0	0	0	0	0	0	0	0	0	0	0	0	0	0	0	0	0	0
	644	0	0	0	0	0	0	0	0	0	0	0	0	0	0	0	0	0	0	0	0									644	0	0	0	0	0	0	0	0	0	0	0	0	0	0	0	0	0	0	0
	645	0	0	0	0	0	0	0	0	0	0	0	0	0	0	0	0	0	0	0	0									645	0	0	0	0	0	0	0	0	0	0	0	0	0	0	0	0	0	0	0
	646	0	0	0	0	0	0	0	0	0	0	0	0	0	0	0	0	0	0	0	0									646	0	0	0	0	0	0	0	0	0	0	0	0	0	0	0	0	0	0	0
	647	0	0	0	0	0	0	0	0	0	0	0	0	0	0	0	0	0	0	0	0									647	0	0	0	0	0	0	0	0	0	0	0	0	0	0	0	0	0	0	0
	648	0	0	0	0	0	0	0	0	0	0	0	0	0	0	0	0	0	0	0	0									648	0	0	0	0	0	0	0	0	0	0	0	0	0	0	0	0	0	0	0
	649	0	0	0	0	0	0	0	0	0	0	0	0	0	0	0	0	0	0	0	0									649	0	0	0	0	0	0	0	0	0	0	0	0	0	0	0	0	0	0	0
	650	0	0	0	0	0	0	0	0	0	0	0	0	0	0	0	0	0	0	0	0									650	0	0	0	0	0	0	0	0	0	0	0	0	0	0	0	0	0	0	0
	651	0	0	0	0	0	0	0	0	0	0	0	0	0	0	0	0	0	0	0	0									651	0	0	0	0	0	0	0	0	0	0	0	0	0	0	0	0	0	0	0
	652	0	0	0	0	0	0	0	0	0	0	0	0	0	0	0	0	0	0	0	0									652	0	0	0	0	0	0	0	0	0	0	0	0	0	0	0	0	0	0	0
	653	0	0	0	0	0	0	0	0	0	0	0	0	0	0	0	0	0	0	0	0									653	0	0	0	0	0	0	0	0	0	0	0	0	0	0	0	0	0	0	0
	654	0	0	0	0	0	0	0	0	0	0	0	0	0	0	0	0	0	0	0	0									654	0	0	0	0	0	0	0	0	0	0	0	0	0	0	0	0	0	0	0
	655	0	0	0	0	0	0	0	0	0	0	0	0	0	0	0	0	0	0	0	0									655	0	0	0	0	0	0	0	0	0	0	0	0	0	0	0	0	0	0	0
	656	0	0	0	0	0	0	0	0	0	0	0	0	0	0	0	0	0	0	0	0									656	0	0	0	0	0	0	0	0	0	0	0	0	0	0	0	0	0	0	0
	657	0	0	0	0	0	0	0	0	0	0	0	0	0	0	0	0	0	0	0	0									657	0	0	0	0	0	0	0	0	0	0	0	0	0	0	0	0	0	0	0
	658	0	0	0	0	0	0	0	0	0	0	0	0	0	0	0	0	0	0	0	0									658	0	0	0	0	0	0	0	0	0	0	0	0	0	0	0	0	0	0	0
	659	0	0	0	0	0	0	0	0	0	0	0	0	0	0	0	0	0	0	0	0									659	0	0	0	0	0	0	0	0	0	0	0	0	0	0	0	0	0	0	0
	660	0	0	0	0	0	0	0	0	0	0	0	0	0	0	0	0	0	0	0	0									660	0	0	0	0	0	0	0	0	0	0	0	0	0	0	0	0	0	0	0
	661	0	0	0	0	0	0	0	0	0	0	0	0	0	0	0	0	0	0	0	0									661	0	0	0	0	0	0	0	0	0	0	0	0	0	0	0	0	0	0	0
	662	0	0	0	0	0	0	0	0	0	0	0	0	0	0	0	0	0	0	0	0									662	0	0	0	0	0	0	0	0	0	0	0	0	0	0	0	0	0	0	0
	663	0	0	0	0	0	0	0	0	0	0	0	0	0	0	0	0	0	0	0	0									663	0	0	0	0	0	0	0	0	0	0	0	0	0	0	0	0	0	0	0
	664	0	0	0	0	0	0	0	0	0	0	0	0	0	0	0	0	0	0	0	0									664	0	0	0	0	0	0	0	0	0	0	0	0	0	0	0	0	0	0	0
	665	0	0	0	0	0	0	0	0	0	0	0	0	0	0	0	0	0	0	0	0									665	0	0	0	0	0	0	0	0	0	0	0	0	0	0	0	0	0	0	0
	666	0	0	0	0	0	0	0	0	0	0	0	0	0	0	0	0	0	0	0	0									666	0	0	0	0	0	0	0	0	0	0	0	0	0	0	0	0	0	0	0
	667	0	0	0	0	0	0	0	0	0	0	0	0	0	0	0	0	0	0	0	0									667	0	0	0	0	0	0	0	0	0	0	0	0	0	0	0	0	0	0	0
	668	0	0	0	0	0	0	0	0	0	0	0	0	0	0	0	0	0	0	0	0									668	0	0	0	0	0	0	0	0	0	0	0	0	0	0	0	0	0	0	0
	669	0	0	0	0	0	0	0	0	0	0	0	0	0	0	0	0	0	0	0	0									669	0	0	0	0	0	0	0	0	0	0	0	0	0	0	0	0	0	0	0
	670	0	0	0	0	0	0	0	0	0	0	0	0	0	0	0	0	0	0	0	0									670	0	0	0	0	0	0	0	0	0	0	0	0	0	0	0	0	0	0	0
	671	0	0	0	0	0	0	0	0	0	0	0	0	0	0	0	0	0	0	0	0									671	0	0	0	0	0	0	0	0	0	0	0	0	0	0	0	0	0	0	0
	672	0	0	0	0	0	0	0	0	0	0	0	0	0	0	0	0	0	0	0	0									672	0	0	0	0	0	0	0	0	0	0	0	0	0	0	0	0	0	0	0
	673	0	0	0	0	0	0	0	0	0	0	0	0	0	0	0	0	0	0	0	0									673	0	0	0	0	0	0	0	0	0	0	0	0	0	0	0	0	0	0	0
	674	0	0	0	0	0	0	0	0	0	0	0	0	0	0	0	0	0	0	0	0									674	0	0	0	0	0	0	0	0	0	0	0	0	0	0	0	0	0	0	0
	675	0	0	0	0	0	0	0	0	0	0	0	0	0	0	0	0	0	0	0	0									675	0	0	0	0	0	0	0	0	0	0	0	0	0	0	0	0	0	0	0
	676	0	0	0	0	0	0	0	0	0	0	0	0	0	0	0	0	0	0	0	0									676	0	0	0	0	0	0	0	0	0	0	0	0	0	0	0	0	0	0	0
	677	0	0	0	0	0	0	0	0	0	0	0	0	0	0	0	0	0	0	0	0									677	0	0	0	0	0	0	0	0	0	0	0	0	0	0	0	0	0	0	0
	678	0	0	0	0	0	0	0	0	0	0	0	0	0	0	0	0	0	0	0	0									678	0	0	0	0	0	0	0	0	0	0	0	0	0	0	0	0	0	0	0
	679	0	0	0	0	0	0	0	0	0	0	0	0	0	0	0	0	0	0	0	0									679	0	0	0	0	0	0	0	0	0	0	0	0	0	0	0	0	0	0	0
	680	0	0	0	0	0	0	0	0	0	0	0	0	0	0	0	0	0	0	0	0									680	0	0	0	0	0	0	0	0	0	0	0	0	0	0	0	0	0	0	0
	681	0	0	0	0	0	0	0	0	0	0	0	0	0	0	0	0	0	0	0	0									681	0	0	0	0	0	0	0	0	0	0	0	0	0	0	0	0	0	0	0
	682	0	0	0	0	0	0	0	0	0	0	0	0	0	0	0	0	0	0	0	0									682	0	0	0	0	0	0	0	0	0	0	0	0	0	0	0	0	0	0	0
	683	0	0	0	0	0	0	0	0	0	0	0	0	0	0	0	0	0	0	0	0									683	0	0	0	0	0	0	0	0	0	0	0	0	0	0	0	0	0	0	0
	684	0	0	0	0	0	0	0	0	0	0	0	0	0	0	0	0	0	0	0	0									684	0	0	0	0	0	0	0	0	0	0	0	0	0	0	0	0	0	0	0
	685	0	0	0	0	0	0	0	0	0	0	0	0	0	0	0	0	0	0	0	0									685	0	0	0	0	0	0	0	0	0	0	0	0	0	0	0	0	0	0	0
	686	0	0	0	0	0	0	0	0	0	0	0	0	0	0	0	0	0	0	0	0									686	0	0	0	0	0	0	0	0	0	0	0	0	0	0	0	0	0	0	0
	687	0	0	0	0	0	0	0	0	0	0	0	0	0	0	0	0	0	0	0	0									687	0	0	0	0	0	0	0	0	0	0	0	0	0	0	0	0	0	0	0
	688	0	0	0	0	0	0	0	0	0	0	0	0	0	0	0	0	0	0	0	0									688	0	0	0	0	0	0	0	0	0	0	0	0	0	0	0	0	0	0	0
	689	0	0	0	0	0	0	0	0	0	0	0	0	0	0	0	0	0	0	0	0									689	0	0	0	0	0	0	0	0	0	0	0	0	0	0	0	0	0	0	0
	690	0	0	0	0	0	0	0	0	0	0	0	0	0	0	0	0	0	0	0	0									690	0	0	0	0	0	0	0	0	0	0	0	0	0	0	0	0	0	0	0
	691	0	0	0	0	0	0	0	0	0	0	0	0	0	0	0	0	0	0	0	0									691	0	0	0	0	0	0	0	0	0	0	0	0	0	0	0	0	0	0	0
	692	0	0	0	0	0	0	0	0	0	0	0	0	0	0	0	0	0	0	0	0									692	0	0	0	0	0	0	0	0	0	0	0	0	0	0	0	0	0	0	0
	693	0	0	0	0	0	0	0	0	0	0	0	0	0	0	0	0	0	0	0	0									693	0	0	0	0	0	0	0	0	0	0	0	0	0	0	0	0	0	0	0
	694	0	0	0	0	0	0	0	0	0	0	0	0	0	0	0	0	0	0	0	0									694	0	0	0	0	0	0	0	0	0	0	0	0	0	0	0	0	0	0	0
	695	0	0	0	0	0	0	0	0	0	0	0	0	0	0	0	0	0	0	0	0									695	0	0	0	0	0	0	0	0	0	0	0	0	0	0	0	0	0	0	0
	696	0	0	0	0	0	0	0	0	0	0	0	0	0	0	0	0	0	0	0	0									696	0	0	0	0	0	0	0	0	0	0	0	0	0	0	0	0	0	0	0
	697	0	0	0	0	0	0	0	0	0	0	0	0	0	0	0	0	0	0	0	0									697	0	0	0	0	0	0	0	0	0	0	0	0	0	0	0	0	0	0	0
	698	0	0	0	0	0	0	0	0	0	0	0	0	0	0	0	0	0	0	0	0									698	0	0	0	0	0	0	0	0	0	0	0	0	0	0	0	0	0	0	0
	699	0	0	0	0	0	0	0	0	0	0	0	0	0	0	0	0	0	0	0	0									699	0	0	0	0	0	0	0	0	0	0	0	0	0	0	0	0	0	0	0
	700	0	0	0	0	0	0	0	0	0	0	0	0	0	0	0	0	0	0	0	0									700	0	0	0	0	0	0	0	0	0	0	0	0	0	0	0	0	0	0	0
	701	0	0	0	0	0	0	0	0	0	0	0	0	0	0	0	0	0	0	0	0									701	0	0	0	0	0	0	0	0	0	0	0	0	0	0	0	0	0	0	0
	702	0	0	0	0	0	0	0	0	0	0	0	0	0	0	0	0	0	0	0	0									702	0	0	0	0	0	0	0	0	0	0	0	0	0	0	0	0	0	0	0
	703	0	0	0	0	0	0	0	0	0	0	0	0	0	0	0	0	0	0	0	0									703	0	0	0	0	0	0	0	0	0	0	0	0	0	0	0	0	0	0	0
	704	0	0	0	0	0	0	0	0	0	0	0	0	0	0	0	0	0	0	0	0									704	0	0	0	0	0	0	0	0	0	0	0	0	0	0	0	0	0	0	0
	705	0	0	0	0	0	0	0	0	0	0	0	0	0	0	0	0	0	0	0	0									705	0	0	0	0	0	0	0	0	0	0	0	0	0	0	0	0	0	0	0
	706	0	0	0	0	0	0	0	0	0	0	0	0	0	0	0	0	0	0	0	0									706	0	0	0	0	0	0	0	0	0	0	0	0	0	0	0	0	0	0	0
	707	0	0	0	0	0	0	0	0	0	0	0	0	0	0	0	0	0	0	0	0									707	0	0	0	0	0	0	0	0	0	0	0	0	0	0	0	0	0	0	0
	708	0	0	0	0	0	0	0	0	0	0	0	0	0	0	0	0	0	0	0	0									708	0	0	0	0	0	0	0	0	0	0	0	0	0	0	0	0	0	0	0
	709	0	0	0	0	0	0	0	0	0	0	0	0	0	0	0	0	0	0	0	0									709	0	0	0	0	0	0	0	0	0	0	0	0	0	0	0	0	0	0	0
	710	0	0	0	0	0	0	0	0	0	0	0	0	0	0	0	0	0	0	0	0									710	0	0	0	0	0	0	0	0	0	0	0	0	0	0	0	0	0	0	0
	711	0	0	0	0	0	0	0	0	0	0	0	0	0	0	0	0	0	0	0	0									711	0	0	0	0	0	0	0	0	0	0	0	0	0	0	0	0	0	0	0
	712	0	0	0	0	0	0	0	0	0	0	0	0	0	0	0	0	0	0	0	0									712	0	0	0	0	0	0	0	0	0	0	0	0	0	0	0	0	0	0	0
	713	0	0	0	0	0	0	0	0	0	0	0	0	0	0	0	0	0	0	0	0									713	0	0	0	0	0	0	0	0	0	0	0	0	0	0	0	0	0	0	0
	714	0	0	0	0	0	0	0	0	0	0	0	0	0	0	0	0	0	0	0	0									714	0	0	0	0	0	0	0	0	0	0	0	0	0	0	0	0	0	0	0
	715	0	0	0	0	0	0	0	0	0	0	0	0	0	0	0	0	0	0	0	0									715	0	0	0	0	0	0	0	0	0	0	0	0	0	0	0	0	0	0	0
	716	0	0	0	0	0	0	0	0	0	0	0	0	0	0	0	0	0	0	0	0									716	0	0	0	0	0	0	0	0	0	0	0	0	0	0	0	0	0	0	0
	717	0	0	0	0	0	0	0	0	0	0	0	0	0	0	0	0	0	0	0	0									717	0	0	0	0	0	0	0	0	0	0	0	0	0	0	0	0	0	0	0
	718	0	0	0	0	0	0	0	0	0	0	0	0	0	0	0	0	0	0	0	0									718	0	0	0	0	0	0	0	0	0	0	0	0	0	0	0	0	0	0	0
	719	0	0	0	0	0	0	0	0	0	0	0	0	0	0	0	0	0	0	0	0									719	0	0	0	0	0	0	0	0	0	0	0	0	0	0	0	0	0	0	0
	720	0	0	0	0	0	0	0	0	0	0	0	0	0	0	0	0	0	0	0	0									720	0	0	0	0	0	0	0	0	0	0	0	0	0	0	0	0	0	0	0
	721	0	0	0	0	0	0	0	0	0	0	0	0	0	0	0	0	0	0	0	0									721	0	0	0	0	0	0	0	0	0	0	0	0	0	0	0	0	0	0	0
	722	0	0	0	0	0	0	0	0	0	0	0	0	0	0	0	0	0	0	0	0									722	0	0	0	0	0	0	0	0	0	0	0	0	0	0	0	0	0	0	0
	723	0	0	0	0	0	0	0	0	0	0	0	0	0	0	0	0	0	0	0	0									723	0	0	0	0	0	0	0	0	0	0	0	0	0	0	0	0	0	0	0
	724	0	0	0	0	0	0	0	0	0	0	0	0	0	0	0	0	0	0	0	0									724	0	0	0	0	0	0	0	0	0	0	0	0	0	0	0	0	0	0	0
	725	0	0	0	0	0	0	0	0	0	0	0	0	0	0	0	0	0	0	0	0									725	0	0	0	0	0	0	0	0	0	0	0	0	0	0	0	0	0	0	0
	726	0	0	0	0	0	0	0	0	0	0	0	0	0	0	0	0	0	0	0	0									726	0	0	0	0	0	0	0	0	0	0	0	0	0	0	0	0	0	0	0
	727	0	0	0	0	0	0	0	0	0	0	0	0	0	0	0	0	0	0	0	0									727	0	0	0	0	0	0	0	0	0	0	0	0	0	0	0	0	0	0	0
	728	0	0	0	0	0	0	0	0	0	0	0	0	0	0	0	0	0	0	0	0									728	0	0	0	0	0	0	0	0	0	0	0	0	0	0	0	0	0	0	0
	729	0	0	0	0	0	0	0	0	0	0	0	0	0	0	0	0	0	0	0	0									729	0	0	0	0	0	0	0	0	0	0	0	0	0	0	0	0	0	0	0
	730	0	0	0	0	0	0	0	0	0	0	0	0	0	0	0	0	0	0	0	0									730	0	0	0	0	0	0	0	0	0	0	0	0	0	0	0	0	0	0	0
	731	0	0	0	0	0	0	0	0	0	0	0	0	0	0	0	0	0	0	0	0									731	0	0	0	0	0	0	0	0	0	0	0	0	0	0	0	0	0	0	0
	732	0	0	0	0	0	0	0	0	0	0	0	0	0	0	0	0	0	0	0	0									732	0	0	0	0	0	0	0	0	0	0	0	0	0	0	0	0	0	0	0
	733	0	0	0	0	0	0	0	0	0	0	0	0	0	0	0	0	0	0	0	0									733	0	0	0	0	0	0	0	0	0	0	0	0	0	0	0	0	0	0	0
	734	0	0	0	0	0	0	0	0	0	0	0	0	0	0	0	0	0	0	0	0									734	0	0	0	0	0	0	0	0	0	0	0	0	0	0	0	0	0	0	0
	735	0	0	0	0	0	0	0	0	0	0	0	0	0	0	0	0	0	0	0	0									735	0	0	0	0	0	0	0	0	0	0	0	0	0	0	0	0	0	0	0
	736	0	0	0	0	0	0	0	0	0	0	0	0	0	0	0	0	0	0	0	0									736	0	0	0	0	0	0	0	0	0	0	0	0	0	0	0	0	0	0	0
	737	0	0	0	0	0	0	0	0	0	0	0	0	0	0	0	0	0	0	0	0									737	0	0	0	0	0	0	0	0	0	0	0	0	0	0	0	0	0	0	0
	738	0	0	0	0	0	0	0	0	0	0	0	0	0	0	0	0	0	0	0	0									738	0	0	0	0	0	0	0	0	0	0	0	0	0	0	0	0	0	0	0
	739	0	0	0	0	0	0	0	0	0	0	0	0	0	0	0	0	0	0	0	0									739	0	0	0	0	0	0	0	0	0	0	0	0	0	0	0	0	0	0	0
	740	0	0	0	0	0	0	0	0	0	0	0	0	0	0	0	0	0	0	0	0									740	0	0	0	0	0	0	0	0	0	0	0	0	0	0	0	0	0	0	0
	741	0	0	0	0	0	0	0	0	0	0	0	0	0	0	0	0	0	0	0	0									741	0	0	0	0	0	0	0	0	0	0	0	0	0	0	0	0	0	0	0
	742	0	0	0	0	0	0	0	0	0	0	0	0	0	0	0	0	0	0	0	0									742	0	0	0	0	0	0	0	0	0	0	0	0	0	0	0	0	0	0	0
	743	0	0	0	0	0	0	0	0	0	0	0	0	0	0	0	0	0	0	0	0									743	0	0	0	0	0	0	0	0	0	0	0	0	0	0	0	0	0	0	0
	744	0	0	0	0	0	0	0	0	0	0	0	0	0	0	0	0	0	0	0	0									744	0	0	0	0	0	0	0	0	0	0	0	0	0	0	0	0	0	0	0
	745	0	0	0	0	0	0	0	0	0	0	0	0	0	0	0	0	0	0	0	0									745	0	0	0	0	0	0	0	0	0	0	0	0	0	0	0	0	0	0	0
	746	0	0	0	0	0	0	0	0	0	0	0	0	0	0	0	0	0	0	0	0									746	0	0	0	0	0	0	0	0	0	0	0	0	0	0	0	0	0	0	0
	747	0	0	0	0	0	0	0	0	0	0	0	0	0	0	0	0	0	0	0	0									747	0	0	0	0	0	0	0	0	0	0	0	0	0	0	0	0	0	0	0
	748	0	0	0	0	0	0	0	0	0	0	0	0	0	0	0	0	0	0	0	0									748	0	0	0	0	0	0	0	0	0	0	0	0	0	0	0	0	0	0	0
	749	0	0	0	0	0	0	0	0	0	0	0	0	0	0	0	0	0	0	0	0									749	0	0	0	0	0	0	0	0	0	0	0	0	0	0	0	0	0	0	0
	750	0	0	0	0	0	0	0	0	0	0	0	0	0	0	0	0	0	0	0	0									750	0	0	0	0	0	0	0	0	0	0	0	0	0	0	0	0	0	0	0
	751	0	0	0	0	0	0	0	0	0	0	0	0	0	0	0	0	0	0	0	0									751	0	0	0	0	0	0	0	0	0	0	0	0	0	0	0	0	0	0	0
	752	0	0	0	0	0	0	0	0	0	0	0	0	0	0	0	0	0	0	0	0									752	0	0	0	0	0	0	0	0	0	0	0	0	0	0	0	0	0	0	0
	753	0	0	0	0	0	0	0	0	0	0	0	0	0	0	0	0	0	0	0	0									753	0	0	0	0	0	0	0	0	0	0	0	0	0	0	0	0	0	0	0
	754	0	0	0	0	0	0	0	0	0	0	0	0	0	0	0	0	0	0	0	0									754	0	0	0	0	0	0	0	0	0	0	0	0	0	0	0	0	0	0	0
	755	0	0	0	0	0	0	0	0	0	0	0	0	0	0	0	0	0	0	0	0									755	0	0	0	0	0	0	0	0	0	0	0	0	0	0	0	0	0	0	0
	756	0	0	0	0	0	0	0	0	0	0	0	0	0	0	0	0	0	0	0	0									756	0	0	0	0	0	0	0	0	0	0	0	0	0	0	0	0	0	0	0
	757	0	0	0	0	0	0	0	0	0	0	0	0	0	0	0	0	0	0	0	0									757	0	0	0	0	0	0	0	0	0	0	0	0	0	0	0	0	0	0	0
	758	0	0	0	0	0	0	0	0	0	0	0	0	0	0	0	0	0	0	0	0									758	0	0	0	0	0	0	0	0	0	0	0	0	0	0	0	0	0	0	0
	759	0	0	0	0	0	0	0	0	0	0	0	0	0	0	0	0	0	0	0	0									759	0	0	0	0	0	0	0	0	0	0	0	0	0	0	0	0	0	0	0
	760	0	0	0	0	0	0	0	0	0	0	0	0	0	0	0	0	0	0	0	0									760	0	0	0	0	0	0	0	0	0	0	0	0	0	0	0	0	0	0	0
	761	0	0	0	0	0	0	0	0	0	0	0	0	0	0	0	0	0	0	0	0									761	0	0	0	0	0	0	0	0	0	0	0	0	0	0	0	0	0	0	0
	762	0	0	0	0	0	0	0	0	0	0	0	0	0	0	0	0	0	0	0	0									762	0	0	0	0	0	0	0	0	0	0	0	0	0	0	0	0	0	0	0
	763	0	0	0	0	0	0	0	0	0	0	0	0	0	0	0	0	0	0	0	0									763	0	0	0	0	0	0	0	0	0	0	0	0	0	0	0	0	0	0	0
	764	0	0	0	0	0	0	0	0	0	0	0	0	0	0	0	0	0	0	0	0									764	0	0	0	0	0	0	0	0	0	0	0	0	0	0	0	0	0	0	0
	765	0	0	0	0	0	0	0	0	0	0	0	0	0	0	0	0	0	0	0	0									765	0	0	0	0	0	0	0	0	0	0	0	0	0	0	0	0	0	0	0
	766	0	0	0	0	0	0	0	0	0	0	0	0	0	0	0	0	0	0	0	0									766	0	0	0	0	0	0	0	0	0	0	0	0	0	0	0	0	0	0	0
	767	0	0	0	0	0	0	0	0	0	0	0	0	0	0	0	0	0	0	0	0									767	0	0	0	0	0	0	0	0	0	0	0	0	0	0	0	0	0	0	0
	768	0	0	0	0	0	0	0	0	0	0	0	0	0	0	0	0	0	0	0	0									768	0	0	0	0	0	0	0	0	0	0	0	0	0	0	0	0	0	0	0
	769	0	0	0	0	0	0	0	0	0	0	0	0	0	0	0	0	0	0	0	0									769	0	0	0	0	0	0	0	0	0	0	0	0	0	0	0	0	0	0	0
	770	0	0	0	0	0	0	0	0	0	0	0	0	0	0	0	0	0	0	0	0									770	0	0	0	0	0	0	0	0	0	0	0	0	0	0	0	0	0	0	0
	771	0	0	0	0	0	0	0	0	0	0	0	0	0	0	0	0	0	0	0	0									771	0	0	0	0	0	0	0	0	0	0	0	0	0	0	0	0	0	0	0
	772	0	0	0	0	0	0	0	0	0	0	0	0	0	0	0	0	0	0	0	0									772	0	0	0	0	0	0	0	0	0	0	0	0	0	0	0	0	0	0	0
	773	0	0	0	0	0	0	0	0	0	0	0	0	0	0	0	0	0	0	0	0									773	0	0	0	0	0	0	0	0	0	0	0	0	0	0	0	0	0	0	0
	774	0	0	0	0	0	0	0	0	0	0	0	0	0	0	0	0	0	0	0	0									774	0	0	0	0	0	0	0	0	0	0	0	0	0	0	0	0	0	0	0
	775	0	0	0	0	0	0	0	0	0	0	0	0	0	0	0	0	0	0	0	0									775	0	0	0	0	0	0	0	0	0	0	0	0	0	0	0	0	0	0	0
	776	0	0	0	0	0	0	0	0	0	0	0	0	0	0	0	0	0	0	0	0									776	0	0	0	0	0	0	0	0	0	0	0	0	0	0	0	0	0	0	0
	777	0	0	0	0	0	0	0	0	0	0	0	0	0	0	0	0	0	0	0	0									777	0	0	0	0	0	0	0	0	0	0	0	0	0	0	0	0	0	0	0
	778	0	0	0	0	0	0	0	0	0	0	0	0	0	0	0	0	0	0	0	0									778	0	0	0	0	0	0	0	0	0	0	0	0	0	0	0	0	0	0	0
	779	0	0	0	0	0	0	0	0	0	0	0	0	0	0	0	0	0	0	0	0									779	0	0	0	0	0	0	0	0	0	0	0	0	0	0	0	0	0	0	0
	780	0	0	0	0	0	0	0	0	0	0	0	0	0	0	0	0	0	0	0	0									780	0	0	0	0	0	0	0	0	0	0	0	0	0	0	0	0	0	0	0
	781	0	0	0	0	0	0	0	0	0	0	0	0	0	0	0	0	0	0	0	0									781	0	0	0	0	0	0	0	0	0	0	0	0	0	0	0	0	0	0	0
	782	0	0	0	0	0	0	0	0	0	0	0	0	0	0	0	0	0	0	0	0									782	0	0	0	0	0	0	0	0	0	0	0	0	0	0	0	0	0	0	0
	783	0	0	0	0	0	0	0	0	0	0	0	0	0	0	0	0	0	0	0	0									783	0	0	0	0	0	0	0	0	0	0	0	0	0	0	0	0	0	0	0
	784	0	0	0	0	0	0	0	0	0	0	0	0	0	0	0	0	0	0	0	0									784	0	0	0	0	0	0	0	0	0	0	0	0	0	0	0	0	0	0	0
	785	0	0	0	0	0	0	0	0	0	0	0	0	0	0	0	0	0	0	0	0									785	0	0	0	0	0	0	0	0	0	0	0	0	0	0	0	0	0	0	0
	786	0	0	0	0	0	0	0	0	0	0	0	0	0	0	0	0	0	0	0	0									786	0	0	0	0	0	0	0	0	0	0	0	0	0	0	0	0	0	0	0
	787	0	0	0	0	0	0	0	0	0	0	0	0	0	0	0	0	0	0	0	0									787	0	0	0	0	0	0	0	0	0	0	0	0	0	0	0	0	0	0	0
	788	0	0	0	0	0	0	0	0	0	0	0	0	0	0	0	0	0	0	0	0									788	0	0	0	0	0	0	0	0	0	0	0	0	0	0	0	0	0	0	0
	789	0	0	0	0	0	0	0	0	0	0	0	0	0	0	0	0	0	0	0	0									789	0	0	0	0	0	0	0	0	0	0	0	0	0	0	0	0	0	0	0
	790	0	0	0	0	0	0	0	0	0	0	0	0	0	0	0	0	0	0	0	0									790	0	0	0	0	0	0	0	0	0	0	0	0	0	0	0	0	0	0	0
	791	0	0	0	0	0	0	0	0	0	0	0	0	0	0	0	0	0	0	0	0									791	0	0	0	0	0	0	0	0	0	0	0	0	0	0	0	0	0	0	0
	792	0	0	0	0	0	0	0	0	0	0	0	0	0	0	0	0	0	0	0	0									792	0	0	0	0	0	0	0	0	0	0	0	0	0	0	0	0	0	0	0
	793	0	0	0	0	0	0	0	0	0	0	0	0	0	0	0	0	0	0	0	0									793	0	0	0	0	0	0	0	0	0	0	0	0	0	0	0	0	0	0	0
	794	0	0	0	0	0	0	0	0	0	0	0	0	0	0	0	0	0	0	0	0									794	0	0	0	0	0	0	0	0	0	0	0	0	0	0	0	0	0	0	0
	795	0	0	0	0	0	0	0	0	0	0	0	0	0	0	0	0	0	0	0	0									795	0	0	0	0	0	0	0	0	0	0	0	0	0	0	0	0	0	0	0
	796	0	0	0	0	0	0	0	0	0	0	0	0	0	0	0	0	0	0	0	0									796	0	0	0	0	0	0	0	0	0	0	0	0	0	0	0	0	0	0	0
	797	0	0	0	0	0	0	0	0	0	0	0	0	0	0	0	0	0	0	0	0									797	0	0	0	0	0	0	0	0	0	0	0	0	0	0	0	0	0	0	0
	798	0	0	0	0	0	0	0	0	0	0	0	0	0	0	0	0	0	0	0	0									798	0	0	0	0	0	0	0	0	0	0	0	0	0	0	0	0	0	0	0
	799	0	0	0	0	0	0	0	0	0	0	0	0	0	0	0	0	0	0	0	0									799	0	0	0	0	0	0	0	0	0	0	0	0	0	0	0	0	0	0	0
	800	0	0	0	0	0	0	0	0	0	0	0	0	0	0	0	0	0	0	0	0									800	0	0	0	0	0	0	0	0	0	0	0	0	0	0	0	0	0	0	0
	801	0	0	0	0	0	0	0	0	0	0	0	0	0	0	0	0	0	0	0	0									801	0	0	0	0	0	0	0	0	0	0	0	0	0	0	0	0	0	0	0
	802	0	0	0	0	0	0	0	0	0	0	0	0	0	0	0	0	0	0	0	0									802	0	0	0	0	0	0	0	0	0	0	0	0	0	0	0	0	0	0	0
	803	0	0	0	0	0	0	0	0	0	0	0	0	0	0	0	0	0	0	0	0									803	0	0	0	0	0	0	0	0	0	0	0	0	0	0	0	0	0	0	0
	804	0	0	0	0	0	0	0	0	0	0	0	0	0	0	0	0	0	0	0	0									804	0	0	0	0	0	0	0	0	0	0	0	0	0	0	0	0	0	0	0
	805	0	0	0	0	0	0	0	0	0	0	0	0	0	0	0	0	0	0	0	0									805	0	0	0	0	0	0	0	0	0	0	0	0	0	0	0	0	0	0	0
	806	0	0	0	0	0	0	0	0	0	0	0	0	0	0	0	0	0	0	0	0									806	0	0	0	0	0	0	0	0	0	0	0	0	0	0	0	0	0	0	0
	807	0	0	0	0	0	0	0	0	0	0	0	0	0	0	0	0	0	0	0	0									807	0	0	0	0	0	0	0	0	0	0	0	0	0	0	0	0	0	0	0
	808	0	0	0	0	0	0	0	0	0	0	0	0	0	0	0	0	0	0	0	0									808	0	0	0	0	0	0	0	0	0	0	0	0	0	0	0	0	0	0	0
	809	0	0	0	0	0	0	0	0	0	0	0	0	0	0	0	0	0	0	0	0									809	0	0	0	0	0	0	0	0	0	0	0	0	0	0	0	0	0	0	0
	810	0	0	0	0	0	0	0	0	0	0	0	0	0	0	0	0	0	0	0	0									810	0	0	0	0	0	0	0	0	0	0	0	0	0	0	0	0	0	0	0
	811	0	0	0	0	0	0	0	0	0	0	0	0	0	0	0	0	0	0	0	0									811	0	0	0	0	0	0	0	0	0	0	0	0	0	0	0	0	0	0	0
	812	0	0	0	0	0	0	0	0	0	0	0	0	0	0	0	0	0	0	0	0									812	0	0	0	0	0	0	0	0	0	0	0	0	0	0	0	0	0	0	0
	813	0	0	0	0	0	0	0	0	0	0	0	0	0	0	0	0	0	0	0	0									813	0	0	0	0	0	0	0	0	0	0	0	0	0	0	0	0	0	0	0
	814	0	0	0	0	0	0	0	0	0	0	0	0	0	0	0	0	0	0	0	0									814	0	0	0	0	0	0	0	0	0	0	0	0	0	0	0	0	0	0	0
	815	0	0	0	0	0	0	0	0	0	0	0	0	0	0	0	0	0	0	0	0									815	0	0	0	0	0	0	0	0	0	0	0	0	0	0	0	0	0	0	0
	816	0	0	0	0	0	0	0	0	0	0	0	0	0	0	0	0	0	0	0	0									816	0	0	0	0	0	0	0	0	0	0	0	0	0	0	0	0	0	0	0
	817	0	0	0	0	0	0	0	0	0	0	0	0	0	0	0	0	0	0	0	0									817	0	0	0	0	0	0	0	0	0	0	0	0	0	0	0	0	0	0	0
	818	0	0	0	0	0	0	0	0	0	0	0	0	0	0	0	0	0	0	0	0									818	0	0	0	0	0	0	0	0	0	0	0	0	0	0	0	0	0	0	0
	819	0	0	0	0	0	0	0	0	0	0	0	0	0	0	0	0	0	0	0	0									819	0	0	0	0	0	0	0	0	0	0	0	0	0	0	0	0	0	0	0
	820	0	0	0	0	0	0	0	0	0	0	0	0	0	0	0	0	0	0	0	0									820	0	0	0	0	0	0	0	0	0	0	0	0	0	0	0	0	0	0	0
	821	0	0	0	0	0	0	0	0	0	0	0	0	0	0	0	0	0	0	0	0									821	0	0	0	0	0	0	0	0	0	0	0	0	0	0	0	0	0	0	0
	822	0	0	0	0	0	0	0	0	0	0	0	0	0	0	0	0	0	0	0	0									822	0	0	0	0	0	0	0	0	0	0	0	0	0	0	0	0	0	0	0
	823	0	0	0	0	0	0	0	0	0	0	0	0	0	0	0	0	0	0	0	0									823	0	0	0	0	0	0	0	0	0	0	0	0	0	0	0	0	0	0	0
	824	0	0	0	0	0	0	0	0	0	0	0	0	0	0	0	0	0	0	0	0									824	0	0	0	0	0	0	0	0	0	0	0	0	0	0	0	0	0	0	0
	825	0	0	0	0	0	0	0	0	0	0	0	0	0	0	0	0	0	0	0	0									825	0	0	0	0	0	0	0	0	0	0	0	0	0	0	0	0	0	0	0
	826	0	0	0	0	0	0	0	0	0	0	0	0	0	0	0	0	0	0	0	0									826	0	0	0	0	0	0	0	0	0	0	0	0	0	0	0	0	0	0	0
	827	0	0	0	0	0	0	0	0	0	0	0	0	0	0	0	0	0	0	0	0									827	0	0	0	0	0	0	0	0	0	0	0	0	0	0	0	0	0	0	0
	828	0	0	0	0	0	0	0	0	0	0	0	0	0	0	0	0	0	0	0	0									828	0	0	0	0	0	0	0	0	0	0	0	0	0	0	0	0	0	0	0
	829	0	0	0	0	0	0	0	0	0	0	0	0	0	0	0	0	0	0	0	0									829	0	0	0	0	0	0	0	0	0	0	0	0	0	0	0	0	0	0	0
	830	0	0	0	0	0	0	0	0	0	0	0	0	0	0	0	0	0	0	0	0									830	0	0	0	0	0	0	0	0	0	0	0	0	0	0	0	0	0	0	0
	831	0	0	0	0	0	0	0	0	0	0	0	0	0	0	0	0	0	0	0	0									831	0	0	0	0	0	0	0	0	0	0	0	0	0	0	0	0	0	0	0
	832	0	0	0	0	0	0	0	0	0	0	0	0	0	0	0	0	0	0	0	0									832	0	0	0	0	0	0	0	0	0	0	0	0	0	0	0	0	0	0	0
	833	0	0	0	0	0	0	0	0	0	0	0	0	0	0	0	0	0	0	0	0									833	0	0	0	0	0	0	0	0	0	0	0	0	0	0	0	0	0	0	0
	834	0	0	0	0	0	0	0	0	0	0	0	0	0	0	0	0	0	0	0	0									834	0	0	0	0	0	0	0	0	0	0	0	0	0	0	0	0	0	0	0
	835	0	0	0	0	0	0	0	0	0	0	0	0	0	0	0	0	0	0	0	0									835	0	0	0	0	0	0	0	0	0	0	0	0	0	0	0	0	0	0	0
	836	0	0	0	0	0	0	0	0	0	0	0	0	0	0	0	0	0	0	0	0									836	0	0	0	0	0	0	0	0	0	0	0	0	0	0	0	0	0	0	0
	837	0	0	0	0	0	0	0	0	0	0	0	0	0	0	0	0	0	0	0	0									837	0	0	0	0	0	0	0	0	0	0	0	0	0	0	0	0	0	0	0
	838	0	0	0	0	0	0	0	0	0	0	0	0	0	0	0	0	0	0	0	0									838	0	0	0	0	0	0	0	0	0	0	0	0	0	0	0	0	0	0	0
	839	0	0	0	0	0	0	0	0	0	0	0	0	0	0	0	0	0	0	0	0									839	0	0	0	0	0	0	0	0	0	0	0	0	0	0	0	0	0	0	0
	840	0	0	0	0	0	0	0	0	0	0	0	0	0	0	0	0	0	0	0	0									840	0	0	0	0	0	0	0	0	0	0	0	0	0	0	0	0	0	0	0
	841	0	0	0	0	0	0	0	0	0	0	0	0	0	0	0	0	0	0	0	0									841	0	0	0	0	0	0	0	0	0	0	0	0	0	0	0	0	0	0	0
	842	0	0	0	0	0	0	0	0	0	0	0	0	0	0	0	0	0	0	0	0									842	0	0	0	0	0	0	0	0	0	0	0	0	0	0	0	0	0	0	0
	843	0	0	0	0	0	0	0	0	0	0	0	0	0	0	0	0	0	0	0	0									843	0	0	0	0	0	0	0	0	0	0	0	0	0	0	0	0	0	0	0
	844	0	0	0	0	0	0	0	0	0	0	0	0	0	0	0	0	0	0	0	0									844	0	0	0	0	0	0	0	0	0	0	0	0	0	0	0	0	0	0	0
	845	0	0	0	0	0	0	0	0	0	0	0	0	0	0	0	0	0	0	0	0									845	0	0	0	0	0	0	0	0	0	0	0	0	0	0	0	0	0	0	0
	846	0	0	0	0	0	0	0	0	0	0	0	0	0	0	0	0	0	0	0	0									846	0	0	0	0	0	0	0	0	0	0	0	0	0	0	0	0	0	0	0
	847	0	0	0	0	0	0	0	0	0	0	0	0	0	0	0	0	0	0	0	0									847	0	0	0	0	0	0	0	0	0	0	0	0	0	0	0	0	0	0	0
	848	0	0	0	0	0	0	0	0	0	0	0	0	0	0	0	0	0	0	0	0									848	0	0	0	0	0	0	0	0	0	0	0	0	0	0	0	0	0	0	0
	849	0	0	0	0	0	0	0	0	0	0	0	0	0	0	0	0	0	0	0	0									849	0	0	0	0	0	0	0	0	0	0	0	0	0	0	0	0	0	0	0
	850	0	0	0	0	0	0	0	0	0	0	0	0	0	0	0	0	0	0	0	0									850	0	0	0	0	0	0	0	0	0	0	0	0	0	0	0	0	0	0	0
	851	0	0	0	0	0	0	0	0	0	0	0	0	0	0	0	0	0	0	0	0									851	0	0	0	0	0	0	0	0	0	0	0	0	0	0	0	0	0	0	0
	852	0	0	0	0	0	0	0	0	0	0	0	0	0	0	0	0	0	0	0	0									852	0	0	0	0	0	0	0	0	0	0	0	0	0	0	0	0	0	0	0
	853	0	0	0	0	0	0	0	0	0	0	0	0	0	0	0	0	0	0	0	0									853	0	0	0	0	0	0	0	0	0	0	0	0	0	0	0	0	0	0	0
	854	0	0	0	0	0	0	0	0	0	0	0	0	0	0	0	0	0	0	0	0									854	0	0	0	0	0	0	0	0	0	0	0	0	0	0	0	0	0	0	0
	855	0	0	0	0	0	0	0	0	0	0	0	0	0	0	0	0	0	0	0	0									855	0	0	0	0	0	0	0	0	0	0	0	0	0	0	0	0	0	0	0
	856	0	0	0	0	0	0	0	0	0	0	0	0	0	0	0	0	0	0	0	0									856	0	0	0	0	0	0	0	0	0	0	0	0	0	0	0	0	0	0	0
	857	0	0	0	0	0	0	0	0	0	0	0	0	0	0	0	0	0	0	0	0									857	0	0	0	0	0	0	0	0	0	0	0	0	0	0	0	0	0	0	0
	858	0	0	0	0	0	0	0	0	0	0	0	0	0	0	0	0	0	0	0	0									858	0	0	0	0	0	0	0	0	0	0	0	0	0	0	0	0	0	0	0
	859	0	0	0	0	0	0	0	0	0	0	0	0	0	0	0	0	0	0	0	0									859	0	0	0	0	0	0	0	0	0	0	0	0	0	0	0	0	0	0	0
	860	0	0	0	0	0	0	0	0	0	0	0	0	0	0	0	0	0	0	0	0									860	0	0	0	0	0	0	0	0	0	0	0	0	0	0	0	0	0	0	0
	861	0	0	0	0	0	0	0	0	0	0	0	0	0	0	0	0	0	0	0	0									861	0	0	0	0	0	0	0	0	0	0	0	0	0	0	0	0	0	0	0
	862	0	0	0	0	0	0	0	0	0	0	0	0	0	0	0	0	0	0	0	0									862	0	0	0	0	0	0	0	0	0	0	0	0	0	0	0	0	0	0	0
	863	0	0	0	0	0	0	0	0	0	0	0	0	0	0	0	0	0	0	0	0									863	0	0	0	0	0	0	0	0	0	0	0	0	0	0	0	0	0	0	0
	864	0	0	0	0	0	0	0	0	0	0	0	0	0	0	0	0	0	0	0	0									864	0	0	0	0	0	0	0	0	0	0	0	0	0	0	0	0	0	0	0
	865	0	0	0	0	0	0	0	0	0	0	0	0	0	0	0	0	0	0	0	0									865	0	0	0	0	0	0	0	0	0	0	0	0	0	0	0	0	0	0	0
	866	0	0	0	0	0	0	0	0	0	0	0	0	0	0	0	0	0	0	0	0									866	0	0	0	0	0	0	0	0	0	0	0	0	0	0	0	0	0	0	0
	867	0	0	0	0	0	0	0	0	0	0	0	0	0	0	0	0	0	0	0	0									867	0	0	0	0	0	0	0	0	0	0	0	0	0	0	0	0	0	0	0
	868	0	0	0	0	0	0	0	0	0	0	0	0	0	0	0	0	0	0	0	0									868	0	0	0	0	0	0	0	0	0	0	0	0	0	0	0	0	0	0	0
	869	0	0	0	0	0	0	0	0	0	0	0	0	0	0	0	0	0	0	0	0									869	0	0	0	0	0	0	0	0	0	0	0	0	0	0	0	0	0	0	0
	870	0	0	0	0	0	0	0	0	0	0	0	0	0	0	0	0	0	0	0	0									870	0	0	0	0	0	0	0	0	0	0	0	0	0	0	0	0	0	0	0
	871	0	0	0	0	0	0	0	0	0	0	0	0	0	0	0	0	0	0	0	0									871	0	0	0	0	0	0	0	0	0	0	0	0	0	0	0	0	0	0	0
	872	0	0	0	0	0	0	0	0	0	0	0	0	0	0	0	0	0	0	0	0									872	0	0	0	0	0	0	0	0	0	0	0	0	0	0	0	0	0	0	0
	873	0	0	0	0	0	0	0	0	0	0	0	0	0	0	0	0	0	0	0	0									873	0	0	0	0	0	0	0	0	0	0	0	0	0	0	0	0	0	0	0
	874	0	0	0	0	0	0	0	0	0	0	0	0	0	0	0	0	0	0	0	0									874	0	0	0	0	0	0	0	0	0	0	0	0	0	0	0	0	0	0	0
	875	0	0	0	0	0	0	0	0	0	0	0	0	0	0	0	0	0	0	0	0									875	0	0	0	0	0	0	0	0	0	0	0	0	0	0	0	0	0	0	0
	876	0	0	0	0	0	0	0	0	0	0	0	0	0	0	0	0	0	0	0	0									876	0	0	0	0	0	0	0	0	0	0	0	0	0	0	0	0	0	0	0
	877	0	0	0	0	0	0	0	0	0	0	0	0	0	0	0	0	0	0	0	0									877	0	0	0	0	0	0	0	0	0	0	0	0	0	0	0	0	0	0	0
	878	0	0	0	0	0	0	0	0	0	0	0	0	0	0	0	0	0	0	0	0									878	0	0	0	0	0	0	0	0	0	0	0	0	0	0	0	0	0	0	0
	879	0	0	0	0	0	0	0	0	0	0	0	0	0	0	0	0	0	0	0	0									879	0	0	0	0	0	0	0	0	0	0	0	0	0	0	0	0	0	0	0
	880	0	0	0	0	0	0	0	0	0	0	0	0	0	0	0	0	0	0	0	0									880	0	0	0	0	0	0	0	0	0	0	0	0	0	0	0	0	0	0	0
	881	0	0	0	0	0	0	0	0	0	0	0	0	0	0	0	0	0	0	0	0									881	0	0	0	0	0	0	0	0	0	0	0	0	0	0	0	0	0	0	0
	882	0	0	0	0	0	0	0	0	0	0	0	0	0	0	0	0	0	0	0	0									882	0	0	0	0	0	0	0	0	0	0	0	0	0	0	0	0	0	0	0
	883	0	0	0	0	0	0	0	0	0	0	0	0	0	0	0	0	0	0	0	0									883	0	0	0	0	0	0	0	0	0	0	0	0	0	0	0	0	0	0	0
	884	0	0	0	0	0	0	0	0	0	0	0	0	0	0	0	0	0	0	0	0									884	0	0	0	0	0	0	0	0	0	0	0	0	0	0	0	0	0	0	0
	885	0	0	0	0	0	0	0	0	0	0	0	0	0	0	0	0	0	0	0	0									885	0	0	0	0	0	0	0	0	0	0	0	0	0	0	0	0	0	0	0
	886	0	0	0	0	0	0	0	0	0	0	0	0	0	0	0	0	0	0	0	0									886	0	0	0	0	0	0	0	0	0	0	0	0	0	0	0	0	0	0	0
	887	0	0	0	0	0	0	0	0	0	0	0	0	0	0	0	0	0	0	0	0									887	0	0	0	0	0	0	0	0	0	0	0	0	0	0	0	0	0	0	0
	888	0	0	0	0	0	0	0	0	0	0	0	0	0	0	0	0	0	0	0	0									888	0	0	0	0	0	0	0	0	0	0	0	0	0	0	0	0	0	0	0
	889	0	0	0	0	0	0	0	0	0	0	0	0	0	0	0	0	0	0	0	0									889	0	0	0	0	0	0	0	0	0	0	0	0	0	0	0	0	0	0	0
	890	0	0	0	0	0	0	0	0	0	0	0	0	0	0	0	0	0	0	0	0									890	0	0	0	0	0	0	0	0	0	0	0	0	0	0	0	0	0	0	0
	891	0	0	0	0	0	0	0	0	0	0	0	0	0	0	0	0	0	0	0	0									891	0	0	0	0	0	0	0	0	0	0	0	0	0	0	0	0	0	0	0
	892	0	0	0	0	0	0	0	0	0	0	0	0	0	0	0	0	0	0	0	0									892	0	0	0	0	0	0	0	0	0	0	0	0	0	0	0	0	0	0	0
	893	0	0	0	0	0	0	0	0	0	0	0	0	0	0	0	0	0	0	0	0									893	0	0	0	0	0	0	0	0	0	0	0	0	0	0	0	0	0	0	0
	894	0	0	0	0	0	0	0	0	0	0	0	0	0	0	0	0	0	0	0	0									894	0	0	0	0	0	0	0	0	0	0	0	0	0	0	0	0	0	0	0
	895	0	0	0	0	0	0	0	0	0	0	0	0	0	0	0	0	0	0	0	0									895	0	0	0	0	0	0	0	0	0	0	0	0	0	0	0	0	0	0	0
	896	0	0	0	0	0	0	0	0	0	0	0	0	0	0	0	0	0	0	0	0									896	0	0	0	0	0	0	0	0	0	0	0	0	0	0	0	0	0	0	0
	897	0	0	0	0	0	0	0	0	0	0	0	0	0	0	0	0	0	0	0	0									897	0	0	0	0	0	0	0	0	0	0	0	0	0	0	0	0	0	0	0
	898	0	0	0	0	0	0	0	0	0	0	0	0	0	0	0	0	0	0	0	0									898	0	0	0	0	0	0	0	0	0	0	0	0	0	0	0	0	0	0	0
	899	0	0	0	0	0	0	0	0	0	0	0	0	0	0	0	0	0	0	0	0									899	0	0	0	0	0	0	0	0	0	0	0	0	0	0	0	0	0	0	0
	900	0	0	0	0	0	0	0	0	0	0	0	0	0	0	0	0	0	0	0	0									900	0	0	0	0	0	0	0	0	0	0	0	0	0	0	0	0	0	0	0
	901	0	0	0	0	0	0	0	0	0	0	0	0	0	0	0	0	0	0	0	0									901	0	0	0	0	0	0	0	0	0	0	0	0	0	0	0	0	0	0	0
	902	0	0	0	0	0	0	0	0	0	0	0	0	0	0	0	0	0	0	0	0									902	0	0	0	0	0	0	0	0	0	0	0	0	0	0	0	0	0	0	0
	903	0	0	0	0	0	0	0	0	0	0	0	0	0	0	0	0	0	0	0	0									903	0	0	0	0	0	0	0	0	0	0	0	0	0	0	0	0	0	0	0
	904	0	0	0	0	0	0	0	0	0	0	0	0	0	0	0	0	0	0	0	0									904	0	0	0	0	0	0	0	0	0	0	0	0	0	0	0	0	0	0	0
	905	0	0	0	0	0	0	0	0	0	0	0	0	0	0	0	0	0	0	0	0									905	0	0	0	0	0	0	0	0	0	0	0	0	0	0	0	0	0	0	0
	906	0	0	0	0	0	0	0	0	0	0	0	0	0	0	0	0	0	0	0	0									906	0	0	0	0	0	0	0	0	0	0	0	0	0	0	0	0	0	0	0
	907	0	0	0	0	0	0	0	0	0	0	0	0	0	0	0	0	0	0	0	0									907	0	0	0	0	0	0	0	0	0	0	0	0	0	0	0	0	0	0	0
	908	0	0	0	0	0	0	0	0	0	0	0	0	0	0	0	0	0	0	0	0									908	0	0	0	0	0	0	0	0	0	0	0	0	0	0	0	0	0	0	0
	909	0	0	0	0	0	0	0	0	0	0	0	0	0	0	0	0	0	0	0	0									909	0	0	0	0	0	0	0	0	0	0	0	0	0	0	0	0	0	0	0
	910	0	0	0	0	0	0	0	0	0	0	0	0	0	0	0	0	0	0	0	0									910	0	0	0	0	0	0	0	0	0	0	0	0	0	0	0	0	0	0	0
	911	0	0	0	0	0	0	0	0	0	0	0	0	0	0	0	0	0	0	0	0									911	0	0	0	0	0	0	0	0	0	0	0	0	0	0	0	0	0	0	0
	912	0	0	0	0	0	0	0	0	0	0	0	0	0	0	0	0	0	0	0	0									912	0	0	0	0	0	0	0	0	0	0	0	0	0	0	0	0	0	0	0
	913	0	0	0	0	0	0	0	0	0	0	0	0	0	0	0	0	0	0	0	0									913	0	0	0	0	0	0	0	0	0	0	0	0	0	0	0	0	0	0	0
	914	0	0	0	0	0	0	0	0	0	0	0	0	0	0	0	0	0	0	0	0									914	0	0	0	0	0	0	0	0	0	0	0	0	0	0	0	0	0	0	0
	915	0	0	0	0	0	0	0	0	0	0	0	0	0	0	0	0	0	0	0	0									915	0	0	0	0	0	0	0	0	0	0	0	0	0	0	0	0	0	0	0
	916	0	0	0	0	0	0	0	0	0	0	0	0	0	0	0	0	0	0	0	0									916	0	0	0	0	0	0	0	0	0	0	0	0	0	0	0	0	0	0	0
	917	0	0	0	0	0	0	0	0	0	0	0	0	0	0	0	0	0	0	0	0									917	0	0	0	0	0	0	0	0	0	0	0	0	0	0	0	0	0	0	0
	918	0	0	0	0	0	0	0	0	0	0	0	0	0	0	0	0	0	0	0	0									918	0	0	0	0	0	0	0	0	0	0	0	0	0	0	0	0	0	0	0
	919	0	0	0	0	0	0	0	0	0	0	0	0	0	0	0	0	0	0	0	0									919	0	0	0	0	0	0	0	0	0	0	0	0	0	0	0	0	0	0	0
	920	0	0	0	0	0	0	0	0	0	0	0	0	0	0	0	0	0	0	0	0									920	0	0	0	0	0	0	0	0	0	0	0	0	0	0	0	0	0	0	0
	921	0	0	0	0	0	0	0	0	0	0	0	0	0	0	0	0	0	0	0	0									921	0	0	0	0	0	0	0	0	0	0	0	0	0	0	0	0	0	0	0
	922	0	0	0	0	0	0	0	0	0	0	0	0	0	0	0	0	0	0	0	0									922	0	0	0	0	0	0	0	0	0	0	0	0	0	0	0	0	0	0	0
	923	0	0	0	0	0	0	0	0	0	0	0	0	0	0	0	0	0	0	0	0									923	0	0	0	0	0	0	0	0	0	0	0	0	0	0	0	0	0	0	0
	924	0	0	0	0	0	0	0	0	0	0	0	0	0	0	0	0	0	0	0	0									924	0	0	0	0	0	0	0	0	0	0	0	0	0	0	0	0	0	0	0
	925	0	0	0	0	0	0	0	0	0	0	0	0	0	0	0	0	0	0	0	0									925	0	0	0	0	0	0	0	0	0	0	0	0	0	0	0	0	0	0	0
	926	0	0	0	0	0	0	0	0	0	0	0	0	0	0	0	0	0	0	0	0									926	0	0	0	0	0	0	0	0	0	0	0	0	0	0	0	0	0	0	0
	927	0	0	0	0	0	0	0	0	0	0	0	0	0	0	0	0	0	0	0	0									927	0	0	0	0	0	0	0	0	0	0	0	0	0	0	0	0	0	0	0
	928	0	0	0	0	0	0	0	0	0	0	0	0	0	0	0	0	0	0	0	0									928	0	0	0	0	0	0	0	0	0	0	0	0	0	0	0	0	0	0	0
	929	0	0	0	0	0	0	0	0	0	0	0	0	0	0	0	0	0	0	0	0									929	0	0	0	0	0	0	0	0	0	0	0	0	0	0	0	0	0	0	0
	930	0	0	0	0	0	0	0	0	0	0	0	0	0	0	0	0	0	0	0	0									930	0	0	0	0	0	0	0	0	0	0	0	0	0	0	0	0	0	0	0
	931	0	0	0	0	0	0	0	0	0	0	0	0	0	0	0	0	0	0	0	0									931	0	0	0	0	0	0	0	0	0	0	0	0	0	0	0	0	0	0	0
	932	0	0	0	0	0	0	0	0	0	0	0	0	0	0	0	0	0	0	0	0									932	0	0	0	0	0	0	0	0	0	0	0	0	0	0	0	0	0	0	0
	933	0	0	0	0	0	0	0	0	0	0	0	0	0	0	0	0	0	0	0	0									933	0	0	0	0	0	0	0	0	0	0	0	0	0	0	0	0	0	0	0
	934	0	0	0	0	0	0	0	0	0	0	0	0	0	0	0	0	0	0	0	0									934	0	0	0	0	0	0	0	0	0	0	0	0	0	0	0	0	0	0	0
	935	0	0	0	0	0	0	0	0	0	0	0	0	0	0	0	0	0	0	0	0									935	0	0	0	0	0	0	0	0	0	0	0	0	0	0	0	0	0	0	0
	936	0	0	0	0	0	0	0	0	0	0	0	0	0	0	0	0	0	0	0	0									936	0	0	0	0	0	0	0	0	0	0	0	0	0	0	0	0	0	0	0
	937	0	0	0	0	0	0	0	0	0	0	0	0	0	0	0	0	0	0	0	0									937	0	0	0	0	0	0	0	0	0	0	0	0	0	0	0	0	0	0	0
	938	0	0	0	0	0	0	0	0	0	0	0	0	0	0	0	0	0	0	0	0									938	0	0	0	0	0	0	0	0	0	0	0	0	0	0	0	0	0	0	0
	939	0	0	0	0	0	0	0	0	0	0	0	0	0	0	0	0	0	0	0	0									939	0	0	0	0	0	0	0	0	0	0	0	0	0	0	0	0	0	0	0
	940	0	0	0	0	0	0	0	0	0	0	0	0	0	0	0	0	0	0	0	0									940	0	0	0	0	0	0	0	0	0	0	0	0	0	0	0	0	0	0	0
	941	0	0	0	0	0	0	0	0	0	0	0	0	0	0	0	0	0	0	0	0									941	0	0	0	0	0	0	0	0	0	0	0	0	0	0	0	0	0	0	0
	942	0	0	0	0	0	0	0	0	0	0	0	0	0	0	0	0	0	0	0	0									942	0	0	0	0	0	0	0	0	0	0	0	0	0	0	0	0	0	0	0
	943	0	0	0	0	0	0	0	0	0	0	0	0	0	0	0	0	0	0	0	0									943	0	0	0	0	0	0	0	0	0	0	0	0	0	0	0	0	0	0	0
	944	0	0	0	0	0	0	0	0	0	0	0	0	0	0	0	0	0	0	0	0									944	0	0	0	0	0	0	0	0	0	0	0	0	0	0	0	0	0	0	0
	945	0	0	0	0	0	0	0	0	0	0	0	0	0	0	0	0	0	0	0	0									945	0	0	0	0	0	0	0	0	0	0	0	0	0	0	0	0	0	0	0
	946	0	0	0	0	0	0	0	0	0	0	0	0	0	0	0	0	0	0	0	0									946	0	0	0	0	0	0	0	0	0	0	0	0	0	0	0	0	0	0	0
	947	0	0	0	0	0	0	0	0	0	0	0	0	0	0	0	0	0	0	0	0									947	0	0	0	0	0	0	0	0	0	0	0	0	0	0	0	0	0	0	0
	948	0	0	0	0	0	0	0	0	0	0	0	0	0	0	0	0	0	0	0	0									948	0	0	0	0	0	0	0	0	0	0	0	0	0	0	0	0	0	0	0
	949	0	0	0	0	0	0	0	0	0	0	0	0	0	0	0	0	0	0	0	0									949	0	0	0	0	0	0	0	0	0	0	0	0	0	0	0	0	0	0	0
	950	0	0	0	0	0	0	0	0	0	0	0	0	0	0	0	0	0	0	0	0									950	0	0	0	0	0	0	0	0	0	0	0	0	0	0	0	0	0	0	0
	951	0	0	0	0	0	0	0	0	0	0	0	0	0	0	0	0	0	0	0	0									951	0	0	0	0	0	0	0	0	0	0	0	0	0	0	0	0	0	0	0
	952	0	0	0	0	0	0	0	0	0	0	0	0	0	0	0	0	0	0	0	0									952	0	0	0	0	0	0	0	0	0	0	0	0	0	0	0	0	0	0	0
	953	0	0	0	0	0	0	0	0	0	0	0	0	0	0	0	0	0	0	0	0									953	0	0	0	0	0	0	0	0	0	0	0	0	0	0	0	0	0	0	0
	954	0	0	0	0	0	0	0	0	0	0	0	0	0	0	0	0	0	0	0	0									954	0	0	0	0	0	0	0	0	0	0	0	0	0	0	0	0	0	0	0
	955	0	0	0	0	0	0	0	0	0	0	0	0	0	0	0	0	0	0	0	0									955	0	0	0	0	0	0	0	0	0	0	0	0	0	0	0	0	0	0	0
	956	0	0	0	0	0	0	0	0	0	0	0	0	0	0	0	0	0	0	0	0									956	0	0	0	0	0	0	0	0	0	0	0	0	0	0	0	0	0	0	0
	957	0	0	0	0	0	0	0	0	0	0	0	0	0	0	0	0	0	0	0	0									957	0	0	0	0	0	0	0	0	0	0	0	0	0	0	0	0	0	0	0
	958	0	0	0	0	0	0	0	0	0	0	0	0	0	0	0	0	0	0	0	0									958	0	0	0	0	0	0	0	0	0	0	0	0	0	0	0	0	0	0	0
	959	0	0	0	0	0	0	0	0	0	0	0	0	0	0	0	0	0	0	0	0									959	0	0	0	0	0	0	0	0	0	0	0	0	0	0	0	0	0	0	0
	960	0	0	0	0	0	0	0	0	0	0	0	0	0	0	0	0	0	0	0	0									960	0	0	0	0	0	0	0	0	0	0	0	0	0	0	0	0	0	0	0
	961	0	0	0	0	0	0	0	0	0	0	0	0	0	0	0	0	0	0	0	0									961	0	0	0	0	0	0	0	0	0	0	0	0	0	0	0	0	0	0	0
	962	0	0	0	0	0	0	0	0	0	0	0	0	0	0	0	0	0	0	0	0									962	0	0	0	0	0	0	0	0	0	0	0	0	0	0	0	0	0	0	0
	963	0	0	0	0	0	0	0	0	0	0	0	0	0	0	0	0	0	0	0	0									963	0	0	0	0	0	0	0	0	0	0	0	0	0	0	0	0	0	0	0
	964	0	0	0	0	0	0	0	0	0	0	0	0	0	0	0	0	0	0	0	0									964	0	0	0	0	0	0	0	0	0	0	0	0	0	0	0	0	0	0	0
	965	0	0	0	0	0	0	0	0	0	0	0	0	0	0	0	0	0	0	0	0									965	0	0	0	0	0	0	0	0	0	0	0	0	0	0	0	0	0	0	0
	966	0	0	0	0	0	0	0	0	0	0	0	0	0	0	0	0	0	0	0	0									966	0	0	0	0	0	0	0	0	0	0	0	0	0	0	0	0	0	0	0
	967	0	0	0	0	0	0	0	0	0	0	0	0	0	0	0	0	0	0	0	0									967	0	0	0	0	0	0	0	0	0	0	0	0	0	0	0	0	0	0	0
	968	0	0	0	0	0	0	0	0	0	0	0	0	0	0	0	0	0	0	0	0									968	0	0	0	0	0	0	0	0	0	0	0	0	0	0	0	0	0	0	0
	969	0	0	0	0	0	0	0	0	0	0	0	0	0	0	0	0	0	0	0	0									969	0	0	0	0	0	0	0	0	0	0	0	0	0	0	0	0	0	0	0
	970	0	0	0	0	0	0	0	0	0	0	0	0	0	0	0	0	0	0	0	0									970	0	0	0	0	0	0	0	0	0	0	0	0	0	0	0	0	0	0	0
	971	0	0	0	0	0	0	0	0	0	0	0	0	0	0	0	0	0	0	0	0									971	0	0	0	0	0	0	0	0	0	0	0	0	0	0	0	0	0	0	0
	972	0	0	0	0	0	0	0	0	0	0	0	0	0	0	0	0	0	0	0	0									972	0	0	0	0	0	0	0	0	0	0	0	0	0	0	0	0	0	0	0
	973	0	0	0	0	0	0	0	0	0	0	0	0	0	0	0	0	0	0	0	0									973	0	0	0	0	0	0	0	0	0	0	0	0	0	0	0	0	0	0	0
	974	0	0	0	0	0	0	0	0	0	0	0	0	0	0	0	0	0	0	0	0									974	0	0	0	0	0	0	0	0	0	0	0	0	0	0	0	0	0	0	0
	975	0	0	0	0	0	0	0	0	0	0	0	0	0	0	0	0	0	0	0	0									975	0	0	0	0	0	0	0	0	0	0	0	0	0	0	0	0	0	0	0
	976	0	0	0	0	0	0	0	0	0	0	0	0	0	0	0	0	0	0	0	0									976	0	0	0	0	0	0	0	0	0	0	0	0	0	0	0	0	0	0	0
	977	0	0	0	0	0	0	0	0	0	0	0	0	0	0	0	0	0	0	0	0									977	0	0	0	0	0	0	0	0	0	0	0	0	0	0	0	0	0	0	0
	978	0	0	0	0	0	0	0	0	0	0	0	0	0	0	0	0	0	0	0	0									978	0	0	0	0	0	0	0	0	0	0	0	0	0	0	0	0	0	0	0
	979	0	0	0	0	0	0	0	0	0	0	0	0	0	0	0	0	0	0	0	0									979	0	0	0	0	0	0	0	0	0	0	0	0	0	0	0	0	0	0	0
	980	0	0	0	0	0	0	0	0	0	0	0	0	0	0	0	0	0	0	0	0									980	0	0	0	0	0	0	0	0	0	0	0	0	0	0	0	0	0	0	0
	981	0	0	0	0	0	0	0	0	0	0	0	0	0	0	0	0	0	0	0	0									981	0	0	0	0	0	0	0	0	0	0	0	0	0	0	0	0	0	0	0
	982	0	0	0	0	0	0	0	0	0	0	0	0	0	0	0	0	0	0	0	0									982	0	0	0	0	0	0	0	0	0	0	0	0	0	0	0	0	0	0	0
	983	0	0	0	0	0	0	0	0	0	0	0	0	0	0	0	0	0	0	0	0									983	0	0	0	0	0	0	0	0	0	0	0	0	0	0	0	0	0	0	0
	984	0	0	0	0	0	0	0	0	0	0	0	0	0	0	0	0	0	0	0	0									984	0	0	0	0	0	0	0	0	0	0	0	0	0	0	0	0	0	0	0
	985	0	0	0	0	0	0	0	0	0	0	0	0	0	0	0	0	0	0	0	0									985	0	0	0	0	0	0	0	0	0	0	0	0	0	0	0	0	0	0	0
	986	0	0	0	0	0	0	0	0	0	0	0	0	0	0	0	0	0	0	0	0									986	0	0	0	0	0	0	0	0	0	0	0	0	0	0	0	0	0	0	0
	987	0	0	0	0	0	0	0	0	0	0	0	0	0	0	0	0	0	0	0	0									987	0	0	0	0	0	0	0	0	0	0	0	0	0	0	0	0	0	0	0
	988	0	0	0	0	0	0	0	0	0	0	0	0	0	0	0	0	0	0	0	0									988	0	0	0	0	0	0	0	0	0	0	0	0	0	0	0	0	0	0	0
	989	0	0	0	0	0	0	0	0	0	0	0	0	0	0	0	0	0	0	0	0									989	0	0	0	0	0	0	0	0	0	0	0	0	0	0	0	0	0	0	0
	990	0	0	0	0	0	0	0	0	0	0	0	0	0	0	0	0	0	0	0	0									990	0	0	0	0	0	0	0	0	0	0	0	0	0	0	0	0	0	0	0
	991	0	0	0	0	0	0	0	0	0	0	0	0	0	0	0	0	0	0	0	0									991	0	0	0	0	0	0	0	0	0	0	0	0	0	0	0	0	0	0	0
	992	0	0	0	0	0	0	0	0	0	0	0	0	0	0	0	0	0	0	0	0									992	0	0	0	0	0	0	0	0	0	0	0	0	0	0	0	0	0	0	0
	993	0	0	0	0	0	0	0	0	0	0	0	0	0	0	0	0	0	0	0	0									993	0	0	0	0	0	0	0	0	0	0	0	0	0	0	0	0	0	0	0
	994	0	0	0	0	0	0	0	0	0	0	0	0	0	0	0	0	0	0	0	0									994	0	0	0	0	0	0	0	0	0	0	0	0	0	0	0	0	0	0	0
	995	0	0	0	0	0	0	0	0	0	0	0	0	0	0	0	0	0	0	0	0									995	0	0	0	0	0	0	0	0	0	0	0	0	0	0	0	0	0	0	0
	996	0	0	0	0	0	0	0	0	0	0	0	0	0	0	0	0	0	0	0	0									996	0	0	0	0	0	0	0	0	0	0	0	0	0	0	0	0	0	0	0
	997	0	0	0	0	0	0	0	0	0	0	0	0	0	0	0	0	0	0	0	0									997	0	0	0	0	0	0	0	0	0	0	0	0	0	0	0	0	0	0	0
	998	0	0	0	0	0	0	0	0	0	0	0	0	0	0	0	0	0	0	0	0									998	0	0	0	0	0	0	0	0	0	0	0	0	0	0	0	0	0	0	0
	999	0	0	0	0	0	0	0	0	0	0	0	0	0	0	0	0	0	0	0	0									999	0	0	0	0	0	0	0	0	0	0	0	0	0	0	0	0	0	0	0
	1000	0	0	0	0	0	0	0	0	0	0	0	0	0	0	0	0	0	0	0	0									1000	0	0	0	0	0	0	0	0	0	0	0	0	0	0	0	0	0	0	0
	1001	0	0	0	0	0	0	0	0	0	0	0	0	0	0	0	0	0	0	0	0									1001	0	0	0	0	0	0	0	0	0	0	0	0	0	0	0	0	0	0	0
	1002	0	0	0	0	0	0	0	0	0	0	0	0	0	0	0	0	0	0	0	0									1002	0	0	0	0	0	0	0	0	0	0	0	0	0	0	0	0	0	0	0
	1003	0	0	0	0	0	0	0	0	0	0	0	0	0	0	0	0	0	0	0	0									1003	0	0	0	0	0	0	0	0	0	0	0	0	0	0	0	0	0	0	0
	1004	0	0	0	0	0	0	0	0	0	0	0	0	0	0	0	0	0	0	0	0									1004	0	0	0	0	0	0	0	0	0	0	0	0	0	0	0	0	0	0	0
	1005	0	0	0	0	0	0	0	0	0	0	0	0	0	0	0	0	0	0	0	0									1005	0	0	0	0	0	0	0	0	0	0	0	0	0	0	0	0	0	0	0
	1006	0	0	0	0	0	0	0	0	0	0	0	0	0	0	0	0	0	0	0	0									1006	0	0	0	0	0	0	0	0	0	0	0	0	0	0	0	0	0	0	0
	1007	0	0	0	0	0	0	0	0	0	0	0	0	0	0	0	0	0	0	0	0									1007	0	0	0	0	0	0	0	0	0	0	0	0	0	0	0	0	0	0	0
	1008	0	0	0	0	0	0	0	0	0	0	0	0	0	0	0	0	0	0	0	0									1008	0	0	0	0	0	0	0	0	0	0	0	0	0	0	0	0	0	0	0
	1009	0	0	0	0	0	0	0	0	0	0	0	0	0	0	0	0	0	0	0	0									1009	0	0	0	0	0	0	0	0	0	0	0	0	0	0	0	0	0	0	0
	1010	0	0	0	0	0	0	0	0	0	0	0	0	0	0	0	0	0	0	0	0									1010	0	0	0	0	0	0	0	0	0	0	0	0	0	0	0	0	0	0	0
	1011	0	0	0	0	0	0	0	0	0	0	0	0	0	0	0	0	0	0	0	0									1011	0	0	0	0	0	0	0	0	0	0	0	0	0	0	0	0	0	0	0
	1012	0	0	0	0	0	0	0	0	0	0	0	0	0	0	0	0	0	0	0	0									1012	0	0	0	0	0	0	0	0	0	0	0	0	0	0	0	0	0	0	0
	1013	0	0	0	0	0	0	0	0	0	0	0	0	0	0	0	0	0	0	0	0									1013	0	0	0	0	0	0	0	0	0	0	0	0	0	0	0	0	0	0	0
	1014	0	0	0	0	0	0	0	0	0	0	0	0	0	0	0	0	0	0	0	0									1014	0	0	0	0	0	0	0	0	0	0	0	0	0	0	0	0	0	0	0
	1015	0	0	0	0	0	0	0	0	0	0	0	0	0	0	0	0	0	0	0	0									1015	0	0	0	0	0	0	0	0	0	0	0	0	0	0	0	0	0	0	0
	1016	0	0	0	0	0	0	0	0	0	0	0	0	0	0	0	0	0	0	0	0									1016	0	0	0	0	0	0	0	0	0	0	0	0	0	0	0	0	0	0	0
	1017	0	0	0	0	0	0	0	0	0	0	0	0	0	0	0	0	0	0	0	0									1017	0	0	0	0	0	0	0	0	0	0	0	0	0	0	0	0	0	0	0
	1018	0	0	0	0	0	0	0	0	0	0	0	0	0	0	0	0	0	0	0	0									1018	0	0	0	0	0	0	0	0	0	0	0	0	0	0	0	0	0	0	0
	1019	0	0	0	0	0	0	0	0	0	0	0	0	0	0	0	0	0	0	0	0									1019	0	0	0	0	0	0	0	0	0	0	0	0	0	0	0	0	0	0	0
	1020	0	0	0	0	0	0	0	0	0	0	0	0	0	0	0	0	0	0	0	0									1020	0	0	0	0	0	0	0	0	0	0	0	0	0	0	0	0	0	0	0
	1021	0	0	0	0	0	0	0	0	0	0	0	0	0	0	0	0	0	0	0	0									1021	0	0	0	0	0	0	0	0	0	0	0	0	0	0	0	0	0	0	0
	1022	0	0	0	0	0	0	0	0	0	0	0	0	0	0	0	0	0	0	0	0									1022	0	0	0	0	0	0	0	0	0	0	0	0	0	0	0	0	0	0	0
	1023	0	0	0	0	0	0	0	0	0	0	0	0	0	0	0	0	0	0	0	0									1023	0	0	0	0	0	0	0	0	0	0	0	0	0	0	0	0	0	0	0
	1024	0	0	0	0	0	0	0	0	0	0	0	0	0	0	0	0	0	0	0	0									1024	0	0	0	0	0	0	0	0	0	0	0	0	0	0	0	0	0	0	0
	1025	0	0	0	0	0	0	0	0	0	0	0	0	0	0	0	0	0	0	0	0									1025	0	0	0	0	0	0	0	0	0	0	0	0	0	0	0	0	0	0	0
	1026	0	0	0	0	0	0	0	0	0	0	0	0	0	0	0	0	0	0	0	0									1026	0	0	0	0	0	0	0	0	0	0	0	0	0	0	0	0	0	0	0
	1027	0	0	0	0	0	0	0	0	0	0	0	0	0	0	0	0	0	0	0	0									1027	0	0	0	0	0	0	0	0	0	0	0	0	0	0	0	0	0	0	0
	1028	0	0	0	0	0	0	0	0	0	0	0	0	0	0	0	0	0	0	0	0									1028	0	0	0	0	0	0	0	0	0	0	0	0	0	0	0	0	0	0	0
	1029	0	0	0	0	0	0	0	0	0	0	0	0	0	0	0	0	0	0	0	0									1029	0	0	0	0	0	0	0	0	0	0	0	0	0	0	0	0	0	0	0
	1030	0	0	0	0	0	0	0	0	0	0	0	0	0	0	0	0	0	0	0	0									1030	0	0	0	0	0	0	0	0	0	0	0	0	0	0	0	0	0	0	0
	1031	0	0	0	0	0	0	0	0	0	0	0	0	0	0	0	0	0	0	0	0									1031	0	0	0	0	0	0	0	0	0	0	0	0	0	0	0	0	0	0	0
	1032	0	0	0	0	0	0	0	0	0	0	0	0	0	0	0	0	0	0	0	0									1032	0	0	0	0	0	0	0	0	0	0	0	0	0	0	0	0	0	0	0
	1033	0	0	0	0	0	0	0	0	0	0	0	0	0	0	0	0	0	0	0	0									1033	0	0	0	0	0	0	0	0	0	0	0	0	0	0	0	0	0	0	0
	1034	0	0	0	0	0	0	0	0	0	0	0	0	0	0	0	0	0	0	0	0									1034	0	0	0	0	0	0	0	0	0	0	0	0	0	0	0	0	0	0	0
	1035	0	0	0	0	0	0	0	0	0	0	0	0	0	0	0	0	0	0	0	0									1035	0	0	0	0	0	0	0	0	0	0	0	0	0	0	0	0	0	0	0
	1036	0	0	0	0	0	0	0	0	0	0	0	0	0	0	0	0	0	0	0	0									1036	0	0	0	0	0	0	0	0	0	0	0	0	0	0	0	0	0	0	0
	1037	0	0	0	0	0	0	0	0	0	0	0	0	0	0	0	0	0	0	0	0									1037	0	0	0	0	0	0	0	0	0	0	0	0	0	0	0	0	0	0	0
	1038	0	0	0	0	0	0	0	0	0	0	0	0	0	0	0	0	0	0	0	0									1038	0	0	0	0	0	0	0	0	0	0	0	0	0	0	0	0	0	0	0
	1039	0	0	0	0	0	0	0	0	0	0	0	0	0	0	0	0	0	0	0	0									1039	0	0	0	0	0	0	0	0	0	0	0	0	0	0	0	0	0	0	0
	1040	0	0	0	0	0	0	0	0	0	0	0	0	0	0	0	0	0	0	0	0									1040	0	0	0	0	0	0	0	0	0	0	0	0	0	0	0	0	0	0	0
	1041	0	0	0	0	0	0	0	0	0	0	0	0	0	0	0	0	0	0	0	0									1041	0	0	0	0	0	0	0	0	0	0	0	0	0	0	0	0	0	0	0
	1042	0	0	0	0	0	0	0	0	0	0	0	0	0	0	0	0	0	0	0	0									1042	0	0	0	0	0	0	0	0	0	0	0	0	0	0	0	0	0	0	0
	1043	0	0	0	0	0	0	0	0	0	0	0	0	0	0	0	0	0	0	0	0									1043	0	0	0	0	0	0	0	0	0	0	0	0	0	0	0	0	0	0	0
	1044	0	0	0	0	0	0	0	0	0	0	0	0	0	0	0	0	0	0	0	0									1044	0	0	0	0	0	0	0	0	0	0	0	0	0	0	0	0	0	0	0
	1045	0	0	0	0	0	0	0	0	0	0	0	0	0	0	0	0	0	0	0	0									1045	0	0	0	0	0	0	0	0	0	0	0	0	0	0	0	0	0	0	0
	1046	0	0	0	0	0	0	0	0	0	0	0	0	0	0	0	0	0	0	0	0									1046	0	0	0	0	0	0	0	0	0	0	0	0	0	0	0	0	0	0	0
	1047	0	0	0	0	0	0	0	0	0	0	0	0	0	0	0	0	0	0	0	0									1047	0	0	0	0	0	0	0	0	0	0	0	0	0	0	0	0	0	0	0
	1048	0	0	0	0	0	0	0	0	0	0	0	0	0	0	0	0	0	0	0	0									1048	0	0	0	0	0	0	0	0	0	0	0	0	0	0	0	0	0	0	0
	1049	0	0	0	0	0	0	0	0	0	0	0	0	0	0	0	0	0	0	0	0									1049	0	0	0	0	0	0	0	0	0	0	0	0	0	0	0	0	0	0	0
	1050	0	0	0	0	0	0	0	0	0	0	0	0	0	0	0	0	0	0	0	0									1050	0	0	0	0	0	0	0	0	0	0	0	0	0	0	0	0	0	0	0
	1051	0	0	0	0	0	0	0	0	0	0	0	0	0	0	0	0	0	0	0	0									1051	0	0	0	0	0	0	0	0	0	0	0	0	0	0	0	0	0	0	0
	1052	0	0	0	0	0	0	0	0	0	0	0	0	0	0	0	0	0	0	0	0									1052	0	0	0	0	0	0	0	0	0	0	0	0	0	0	0	0	0	0	0
	1053	0	0	0	0	0	0	0	0	0	0	0	0	0	0	0	0	0	0	0	0									1053	0	0	0	0	0	0	0	0	0	0	0	0	0	0	0	0	0	0	0
	1054	0	0	0	0	0	0	0	0	0	0	0	0	0	0	0	0	0	0	0	0									1054	0	0	0	0	0	0	0	0	0	0	0	0	0	0	0	0	0	0	0
	1055	0	0	0	0	0	0	0	0	0	0	0	0	0	0	0	0	0	0	0	0									1055	0	0	0	0	0	0	0	0	0	0	0	0	0	0	0	0	0	0	0
	1056	0	0	0	0	0	0	0	0	0	0	0	0	0	0	0	0	0	0	0	0									1056	0	0	0	0	0	0	0	0	0	0	0	0	0	0	0	0	0	0	0
	1057	0	0	0	0	0	0	0	0	0	0	0	0	0	0	0	0	0	0	0	0									1057	0	0	0	0	0	0	0	0	0	0	0	0	0	0	0	0	0	0	0
	1058	0	0	0	0	0	0	0	0	0	0	0	0	0	0	0	0	0	0	0	0									1058	0	0	0	0	0	0	0	0	0	0	0	0	0	0	0	0	0	0	0
	1059	0	0	0	0	0	0	0	0	0	0	0	0	0	0	0	0	0	0	0	0									1059	0	0	0	0	0	0	0	0	0	0	0	0	0	0	0	0	0	0	0
	1060	0	0	0	0	0	0	0	0	0	0	0	0	0	0	0	0	0	0	0	0									1060	0	0	0	0	0	0	0	0	0	0	0	0	0	0	0	0	0	0	0
	1061	0	0	0	0	0	0	0	0	0	0	0	0	0	0	0	0	0	0	0	0									1061	0	0	0	0	0	0	0	0	0	0	0	0	0	0	0	0	0	0	0
	1062	0	0	0	0	0	0	0	0	0	0	0	0	0	0	0	0	0	0	0	0									1062	0	0	0	0	0	0	0	0	0	0	0	0	0	0	0	0	0	0	0
	1063	0	0	0	0	0	0	0	0	0	0	0	0	0	0	0	0	0	0	0	0									1063	0	0	0	0	0	0	0	0	0	0	0	0	0	0	0	0	0	0	0
	1064	0	0	0	0	0	0	0	0	0	0	0	0	0	0	0	0	0	0	0	0									1064	0	0	0	0	0	0	0	0	0	0	0	0	0	0	0	0	0	0	0
	1065	0	0	0	0	0	0	0	0	0	0	0	0	0	0	0	0	0	0	0	0									1065	0	0	0	0	0	0	0	0	0	0	0	0	0	0	0	0	0	0	0
	1066	0	0	0	0	0	0	0	0	0	0	0	0	0	0	0	0	0	0	0	0									1066	0	0	0	0	0	0	0	0	0	0	0	0	0	0	0	0	0	0	0
	1067	0	0	0	0	0	0	0	0	0	0	0	0	0	0	0	0	0	0	0	0									1067	0	0	0	0	0	0	0	0	0	0	0	0	0	0	0	0	0	0	0
	1068	0	0	0	0	0	0	0	0	0	0	0	0	0	0	0	0	0	0	0	0									1068	0	0	0	0	0	0	0	0	0	0	0	0	0	0	0	0	0	0	0
	1069	0	0	0	0	0	0	0	0	0	0	0	0	0	0	0	0	0	0	0	0									1069	0	0	0	0	0	0	0	0	0	0	0	0	0	0	0	0	0	0	0
	1070	0	0	0	0	0	0	0	0	0	0	0	0	0	0	0	0	0	0	0	0
	1071	0	0	0	0	0	0	0	0	0	0	0	0	0	0	0	0	0	0	0	0
	1072	0	0	0	0	0	0	0	0	0	0	0	0	0	0	0	0	0	0	0	0
	1073	0	0	0	0	0	0	0	0	0	0	0	0	0	0	0	0	0	0	0	0
	1074	0	0	0	0	0	0	0	0	0	0	0	0	0	0	0	0	0	0	0	0
	1075	0	0	0	0	0	0	0	0	0	0	0	0	0	0	0	0	0	0	0	0
	1076	0	0	0	0	0	0	0	0	0	0	0	0	0	0	0	0	0	0	0	0
	1077	0	0	0	0	0	0	0	0	0	0	0	0	0	0	0	0	0	0	0	0
	1078	0	0	0	0	0	0	0	0	0	0	0	0	0	0	0	0	0	0	0	0
	1079	0	0	0	0	0	0	0	0	0	0	0	0	0	0	0	0	0	0	0	0
	1080	0	0	0	0	0	0	0	0	0	0	0	0	0	0	0	0	0	0	0	0
	1081	0	0	0	0	0	0	0	0	0	0	0	0	0	0	0	0	0	0	0	0
	1082	0	0	0	0	0	0	0	0	0	0	0	0	0	0	0	0	0	0	0	0
	1083	0	0	0	0	0	0	0	0	0	0	0	0	0	0	0	0	0	0	0	0
	1084	0	0	0	0	0	0	0	0	0	0	0	0	0	0	0	0	0	0	0	0
	1085	0	0	0	0	0	0	0	0	0	0	0	0	0	0	0	0	0	0	0	0
	1086	0	0	0	0	0	0	0	0	0	0	0	0	0	0	0	0	0	0	0	0
	1087	0	0	0	0	0	0	0	0	0	0	0	0	0	0	0	0	0	0	0	0
	1088	0	0	0	0	0	0	0	0	0	0	0	0	0	0	0	0	0	0	0	0
	1089	0	0	0	0	0	0	0	0	0	0	0	0	0	0	0	0	0	0	0	0
	1090	0	0	0	0	0	0	0	0	0	0	0	0	0	0	0	0	0	0	0	0
	1091	0	0	0	0	0	0	0	0	0	0	0	0	0	0	0	0	0	0	0	0
	1092	0	0	0	0	0	0	0	0	0	0	0	0	0	0	0	0	0	0	0	0
	1093	0	0	0	0	0	0	0	0	0	0	0	0	0	0	0	0	0	0	0	0
	1094	0	0	0	0	0	0	0	0	0	0	0	0	0	0	0	0	0	0	0	0
	1095	0	0	0	0	0	0	0	0	0	0	0	0	0	0	0	0	0	0	0	0
	1096	0	0	0	0	0	0	0	0	0	0	0	0	0	0	0	0	0	0	0	0
	1097	0	0	0	0	0	0	0	0	0	0	0	0	0	0	0	0	0	0	0	0
	1098	0	0	0	0	0	0	0	0	0	0	0	0	0	0	0	0	0	0	0	0
	1099	0	0	0	0	0	0	0	0	0	0	0	0	0	0	0	0	0	0	0	0
	1100	0	0	0	0	0	0	0	0	0	0	0	0	0	0	0	0	0	0	0	0
	1101	0	0	0	0	0	0	0	0	0	0	0	0	0	0	0	0	0	0	0	0
	1102	0	0	0	0	0	0	0	0	0	0	0	0	0	0	0	0	0	0	0	0
	1103	0	0	0	0	0	0	0	0	0	0	0	0	0	0	0	0	0	0	0	0
	1104	0	0	0	0	0	0	0	0	0	0	0	0	0	0	0	0	0	0	0	0
	1105	0	0	0	0	0	0	0	0	0	0	0	0	0	0	0	0	0	0	0	0
	1106	0	0	0	0	0	0	0	0	0	0	0	0	0	0	0	0	0	0	0	0
	1107	0	0	0	0	0	0	0	0	0	0	0	0	0	0	0	0	0	0	0	0
	1108	0	0	0	0	0	0	0	0	0	0	0	0	0	0	0	0	0	0	0	0
	1109	0	0	0	0	0	0	0	0	0	0	0	0	0	0	0	0	0	0	0	0
	1110	0	0	0	0	0	0	0	0	0	0	0	0	0	0	0	0	0	0	0	0
	1111	0	0	0	0	0	0	0	0	0	0	0	0	0	0	0	0	0	0	0	0
	1112	0	0	0	0	0	0	0	0	0	0	0	0	0	0	0	0	0	0	0	0
	1113	0	0	0	0	0	0	0	0	0	0	0	0	0	0	0	0	0	0	0	0
	1114	0	0	0	0	0	0	0	0	0	0	0	0	0	0	0	0	0	0	0	0
	1115	0	0	0	0	0	0	0	0	0	0	0	0	0	0	0	0	0	0	0	0
	1116	0	0	0	0	0	0	0	0	0	0	0	0	0	0	0	0	0	0	0	0
	1117	0	0	0	0	0	0	0	0	0	0	0	0	0	0	0	0	0	0	0	0
	1118	0	0	0	0	0	0	0	0	0	0	0	0	0	0	0	0	0	0	0	0
	1119	0	0	0	0	0	0	0	0	0	0	0	0	0	0	0	0	0	0	0	0
	1120	0	0	0	0	0	0	0	0	0	0	0	0	0	0	0	0	0	0	0	0
	1121	0	0	0	0	0	0	0	0	0	0	0	0	0	0	0	0	0	0	0	0
	1122	0	0	0	0	0	0	0	0	0	0	0	0	0	0	0	0	0	0	0	0
	1123	0	0	0	0	0	0	0	0	0	0	0	0	0	0	0	0	0	0	0	0
	1124	0	0	0	0	0	0	0	0	0	0	0	0	0	0	0	0	0	0	0	0
	1125	0	0	0	0	0	0	0	0	0	0	0	0	0	0	0	0	0	0	0	0
	1126	0	0	0	0	0	0	0	0	0	0	0	0	0	0	0	0	0	0	0	0
	1127	0	0	0	0	0	0	0	0	0	0	0	0	0	0	0	0	0	0	0	0
	1128	0	0	0	0	0	0	0	0	0	0	0	0	0	0	0	0	0	0	0	0
	1129	0	0	0	0	0	0	0	0	0	0	0	0	0	0	0	0	0	0	0	0
	1130	0	0	0	0	0	0	0	0	0	0	0	0	0	0	0	0	0	0	0	0
	1131	0	0	0	0	0	0	0	0	0	0	0	0	0	0	0	0	0	0	0	0
	1132	0	0	0	0	0	0	0	0	0	0	0	0	0	0	0	0	0	0	0	0
	1133	0	0	0	0	0	0	0	0	0	0	0	0	0	0	0	0	0	0	0	0
	1134	0	0	0	0	0	0	0	0	0	0	0	0	0	0	0	0	0	0	0	0
	1135	0	0	0	0	0	0	0	0	0	0	0	0	0	0	0	0	0	0	0	0
	1136	0	0	0	0	0	0	0	0	0	0	0	0	0	0	0	0	0	0	0	0
	1137	0	0	0	0	0	0	0	0	0	0	0	0	0	0	0	0	0	0	0	0
	1138	0	0	0	0	0	0	0	0	0	0	0	0	0	0	0	0	0	0	0	0
	1139	0	0	0	0	0	0	0	0	0	0	0	0	0	0	0	0	0	0	0	0
	1140	0	0	0	0	0	0	0	0	0	0	0	0	0	0	0	0	0	0	0	0
	1141	0	0	0	0	0	0	0	0	0	0	0	0	0	0	0	0	0	0	0	0
	1142	0	0	0	0	0	0	0	0	0	0	0	0	0	0	0	0	0	0	0	0
	1143	0	0	0	0	0	0	0	0	0	0	0	0	0	0	0	0	0	0	0	0
	1144	0	0	0	0	0	0	0	0	0	0	0	0	0	0	0	0	0	0	0	0
	1145	0	0	0	0	0	0	0	0	0	0	0	0	0	0	0	0	0	0	0	0
	1146	0	0	0	0	0	0	0	0	0	0	0	0	0	0	0	0	0	0	0	0
	1147	0	0	0	0	0	0	0	0	0	0	0	0	0	0	0	0	0	0	0	0
	1148	0	0	0	0	0	0	0	0	0	0	0	0	0	0	0	0	0	0	0	0
	1149	0	0	0	0	0	0	0	0	0	0	0	0	0	0	0	0	0	0	0	0
	1150	0	0	0	0	0	0	0	0	0	0	0	0	0	0	0	0	0	0	0	0
	1151	0	0	0	0	0	0	0	0	0	0	0	0	0	0	0	0	0	0	0	0
	1152	0	0	0	0	0	0	0	0	0	0	0	0	0	0	0	0	0	0	0	0
	1153	0	0	0	0	0	0	0	0	0	0	0	0	0	0	0	0	0	0	0	0
	1154	0	0	0	0	0	0	0	0	0	0	0	0	0	0	0	0	0	0	0	0
	1155	0	0	0	0	0	0	0	0	0	0	0	0	0	0	0	0	0	0	0	0
	1156	0	0	0	0	0	0	0	0	0	0	0	0	0	0	0	0	0	0	0	0
	1157	0	0	0	0	0	0	0	0	0	0	0	0	0	0	0	0	0	0	0	0
	1158	0	0	0	0	0	0	0	0	0	0	0	0	0	0	0	0	0	0	0	0
	1159	0	0	0	0	0	0	0	0	0	0	0	0	0	0	0	0	0	0	0	0
	1160	0	0	0	0	0	0	0	0	0	0	0	0	0	0	0	0	0	0	0	0
	1161	0	0	0	0	0	0	0	0	0	0	0	0	0	0	0	0	0	0	0	0
	1162	0	0	0	0	0	0	0	0	0	0	0	0	0	0	0	0	0	0	0	0
	1163	0	0	0	0	0	0	0	0	0	0	0	0	0	0	0	0	0	0	0	0
	1164	0	0	0	0	0	0	0	0	0	0	0	0	0	0	0	0	0	0	0	0
	1165	0	0	0	0	0	0	0	0	0	0	0	0	0	0	0	0	0	0	0	0
	1166	0	0	0	0	0	0	0	0	0	0	0	0	0	0	0	0	0	0	0	0
	1167	0	0	0	0	0	0	0	0	0	0	0	0	0	0	0	0	0	0	0	0
	1168	0	0	0	0	0	0	0	0	0	0	0	0	0	0	0	0	0	0	0	0
	1169	0	0	0	0	0	0	0	0	0	0	0	0	0	0	0	0	0	0	0	0
	1170	0	0	0	0	0	0	0	0	0	0	0	0	0	0	0	0	0	0	0	0
	1171	0	0	0	0	0	0	0	0	0	0	0	0	0	0	0	0	0	0	0	0
	1172	0	0	0	0	0	0	0	0	0	0	0	0	0	0	0	0	0	0	0	0
	1173	0	0	0	0	0	0	0	0	0	0	0	0	0	0	0	0	0	0	0	0
	1174	0	0	0	0	0	0	0	0	0	0	0	0	0	0	0	0	0	0	0	0
	1175	0	0	0	0	0	0	0	0	0	0	0	0	0	0	0	0	0	0	0	0
	1176	0	0	0	0	0	0	0	0	0	0	0	0	0	0	0	0	0	0	0	0
	1177	0	0	0	0	0	0	0	0	0	0	0	0	0	0	0	0	0	0	0	0
	1178	0	0	0	0	0	0	0	0	0	0	0	0	0	0	0	0	0	0	0	0
	1179	0	0	0	0	0	0	0	0	0	0	0	0	0	0	0	0	0	0	0	0
	1180	0	0	0	0	0	0	0	0	0	0	0	0	0	0	0	0	0	0	0	0
	1181	0	0	0	0	0	0	0	0	0	0	0	0	0	0	0	0	0	0	0	0
	1182	0	0	0	0	0	0	0	0	0	0	0	0	0	0	0	0	0	0	0	0
	1183	0	0	0	0	0	0	0	0	0	0	0	0	0	0	0	0	0	0	0	0
	1184	0	0	0	0	0	0	0	0	0	0	0	0	0	0	0	0	0	0	0	0
	1185	0	0	0	0	0	0	0	0	0	0	0	0	0	0	0	0	0	0	0	0
	1186	0	0	0	0	0	0	0	0	0	0	0	0	0	0	0	0	0	0	0	0
	1187	0	0	0	0	0	0	0	0	0	0	0	0	0	0	0	0	0	0	0	0
	1188	0	0	0	0	0	0	0	0	0	0	0	0	0	0	0	0	0	0	0	0
	1189	0	0	0	0	0	0	0	0	0	0	0	0	0	0	0	0	0	0	0	0
	1190	0	0	0	0	0	0	0	0	0	0	0	0	0	0	0	0	0	0	0	0
	1191	0	0	0	0	0	0	0	0	0	0	0	0	0	0	0	0	0	0	0	0
	1192	0	0	0	0	0	0	0	0	0	0	0	0	0	0	0	0	0	0	0	0
	1193	0	0	0	0	0	0	0	0	0	0	0	0	0	0	0	0	0	0	0	0
	1194	0	0	0	0	0	0	0	0	0	0	0	0	0	0	0	0	0	0	0	0
	1195	0	0	0	0	0	0	0	0	0	0	0	0	0	0	0	0	0	0	0	0
	1196	0	0	0	0	0	0	0	0	0	0	0	0	0	0	0	0	0	0	0	0
	1197	0	0	0	0	0	0	0	0	0	0	0	0	0	0	0	0	0	0	0	0
	1198	0	0	0	0	0	0	0	0	0	0	0	0	0	0	0	0	0	0	0	0
	1199	0	0	0	0	0	0	0	0	0	0	0	0	0	0	0	0	0	0	0	0
	1200	0	0	0	0	0	0	0	0	0	0	0	0	0	0	0	0	0	0	0	0
	1201	0	0	0	0	0	0	0	0	0	0	0	0	0	0	0	0	0	0	0	0
	1202	0	0	0	0	0	0	0	0	0	0	0	0	0	0	0	0	0	0	0	0
	1203	0	0	0	0	0	0	0	0	0	0	0	0	0	0	0	0	0	0	0	0
	1204	0	0	0	0	0	0	0	0	0	0	0	0	0	0	0	0	0	0	0	0
	1205	0	0	0	0	0	0	0	0	0	0	0	0	0	0	0	0	0	0	0	0
	1206	0	0	0	0	0	0	0	0	0	0	0	0	0	0	0	0	0	0	0	0
	1207	0	0	0	0	0	0	0	0	0	0	0	0	0	0	0	0	0	0	0	0
	1208	0	0	0	0	0	0	0	0	0	0	0	0	0	0	0	0	0	0	0	0
	1209	0	0	0	0	0	0	0	0	0	0	0	0	0	0	0	0	0	0	0	0
	1210	0	0	0	0	0	0	0	0	0	0	0	0	0	0	0	0	0	0	0	0
	1211	0	0	0	0	0	0	0	0	0	0	0	0	0	0	0	0	0	0	0	0
	1212	0	0	0	0	0	0	0	0	0	0	0	0	0	0	0	0	0	0	0	0
	1213	0	0	0	0	0	0	0	0	0	0	0	0	0	0	0	0	0	0	0	0										0	0	0	0	0	0	0	0	0	0	0	0	0	0	0	0	0	0	0
	1214	0	0	0	0	0	0	0	0	0	0	0	0	0	0	0	0	0	0	0	0										0	0	0	0	0	0	0	0	0	0	0	0	0	0	0	0	0	0	0
	1215	0	0	0	0	0	0	0	0	0	0	0	0	0	0	0	0	0	0	0	0										0	0	0	0	0	0	0	0	0	0	0	0	0	0	0	0	0	0	0
	1216	0	0	0	0	0	0	0	0	0	0	0	0	0	0	0	0	0	0	0	0										0	0	0	0	0	0	0	0	0	0	0	0	0	0	0	0	0	0	0
	1217	0	0	0	0	0	0	0	0	0	0	0	0	0	0	0	0	0	0	0	0										0	0	0	0	0	0	0	0	0	0	0	0	0	0	0	0	0	0	0
																															0	0	0	0	0	0	0	0	0	0	0	0	0	0	0	0	0	0	0
SUM	609	64.12	71.1	68.48	74.26	67.52	32.02	71.02	95.56	160.28	277.68	518.72	492.1	2515.56	1895.34	14129.3	1162.52	362.7	254	333.352	137.1									571915	391.33	432.05	415.66	452.9	414.03	197.79	431.87	577.8	964.26	1669.58	3373.11	3161.61	16794.1	12744.8	98596.6	7754.69	2304.19	1716	2241.45
CN X SUM OF ELEM.		384.72	426.6	410.88	445.56	405.12	192.12	426.12	573.36	961.68	1666.08	3112.32	2952.6	15093.4	11372	84775.8	6975.12	2176.2	1524	2000.11	822.6
		7	8	9	10	11	12	13	14	15	16	17	18	19	20	21	22	23	24	25	26
	SC	0.983109	0.987386	0.9885	0.983793	0.97848	0.971333	0.986686	0.992316	0.997324	0.997904	0.922686	0.933891	0.898728	0.892287	0.859824	0.899471	0.944453	0.888112	0.89233	0.871408
[truncated: 3 more columns]

## Sheet: Psim & Pdsim 2
	OPTINALYSIS: SEQUENCE ANALYSIS THROUGH A LOOKING-GLASS
	CN = Central node; Kc = Kabirian coefficient of similarity; PSim. = Probability level of similarity; PDsim. = Probability level of dissimilarity																NUM. = Numeration; DEN. = Denumeration
				For Kc >1 and -ves		For Kc <1
	RESULTS	CN	Kc	Psim,	Pdsim.	Psim,	Pdsim.										NUM	DEN		NUM	DEN
	TA:GV	6	1.15154	0.583279	0.416721	1.71445	-0.714446										0.848456	1.45463		-1.45463	-0.848456
	TB:GV	6	0.775965	3.73302	-2.73302	0.26788	0.73212										1.22404	0.327894		-0.327894	-1.22404
	TC:GV	6	0.698085	13.8125	-12.8125	0.0723982	0.927602										1.30191	0.0942563		-0.0942563	-1.30191
	TD:GV	6	0.919044	1.4277	-0.427696	0.700429	0.299571										1.08096	0.757133		-0.757133	-1.08096
	TE:GV	6	0.862254	1.93902	-0.939021	0.515724	0.484276										1.13775	0.586763		-0.586763	-1.13775
	TA:GVI	6	1.03215	0.882711	0.117289	1.13287	-0.132873										0.96785	1.09645		-1.09645	-0.96785
	TB:GVI	6	1.03267	0.880987	0.119013	1.13509	-0.135091										0.967331	1.09801		-1.09801	-0.967331
	TC:GVI	6	1.0448	0.842027	0.157973	1.18761	-0.187611										0.955199	1.1344		-1.1344	-0.955199
	TD:GVI	6	1.04086	0.854416	0.145584	1.17039	-0.17039										0.959143	1.12257		-1.12257	-0.959143
	TE:GVI	6	1.0399	0.857461	0.142539	1.16623	-0.166234										0.9601	1.1197		-1.1197	-0.9601
	Seq.	6	#DIV/0!	#DIV/0!	#DIV/0!	#DIV/0!	#DIV/0!										#DIV/0!	#DIV/0!		#DIV/0!	#DIV/0!
	Seq.	6	#DIV/0!	#DIV/0!	#DIV/0!	#DIV/0!	#DIV/0!										#DIV/0!	#DIV/0!		#DIV/0!	#DIV/0!
	Seq.	6	#DIV/0!	#DIV/0!	#DIV/0!	#DIV/0!	#DIV/0!										#DIV/0!	#DIV/0!		#DIV/0!	#DIV/0!
	Seq.	6	#DIV/0!	#DIV/0!	#DIV/0!	#DIV/0!	#DIV/0!										#DIV/0!	#DIV/0!		#DIV/0!	#DIV/0!
	Seq.	6	#DIV/0!	#DIV/0!	#DIV/0!	#DIV/0!	#DIV/0!										#DIV/0!	#DIV/0!		#DIV/0!	#DIV/0!
	Seq.	6	#DIV/0!	#DIV/0!	#DIV/0!	#DIV/0!	#DIV/0!										#DIV/0!	#DIV/0!		#DIV/0!	#DIV/0!
	Seq.	6	#DIV/0!	#DIV/0!	#DIV/0!	#DIV/0!	#DIV/0!										#DIV/0!	#DIV/0!		#DIV/0!	#DIV/0!
	Seq.	6	#DIV/0!	#DIV/0!	#DIV/0!	#DIV/0!	#DIV/0!										#DIV/0!	#DIV/0!		#DIV/0!	#DIV/0!
	Seq.	6	#DIV/0!	#DIV/0!	#DIV/0!	#DIV/0!	#DIV/0!										#DIV/0!	#DIV/0!		#DIV/0!	#DIV/0!
	Seq.	6	#DIV/0!	#DIV/0!	#DIV/0!	#DIV/0!	#DIV/0!										#DIV/0!	#DIV/0!		#DIV/0!	#DIV/0!
	SEQUENCES	INPUT SEQUENCE																												SEQUENCES	COMPUTATION AND CALCULATIONS
	QUANTITATIVE SCALE	TA:GV	TB:GV	TC:GV	TD:GV	TE:GV	TA:GVI	TB:GVI	TC:GVI	TD:GVI	TE:GVI	Seq.	Seq.	Seq.	Seq.	Seq.	Seq.	Seq.	Seq.	Seq.	Seq.									QUANTITATIVE SCALE	TA:GV	TB:GV	TC:GV	TD:GV	TE:GV	TA:GVI	TB:GVI	TC:GVI	TD:GVI	TE:GVI	Seq.	Seq.	Seq.	Seq.	Seq.	Seq.	Seq.	Seq.	Seq.
	1	-99	-765	-65	22	-65	-56	-56	-32	-654	-42	0	0	0	0	0	0	0	0	0	0									1	-99	-765	-65	22	-65	-56	-56	-32	-654	-42	0	0	0	0	0	0	0	0	0
	2	-67	-467	-35	45	-46	-46	-55	-24	-456	-34	0	0	0	0	0	0	0	0	0	0									2	-134	-934	-70	90	-92	-92	-110	-48	-912	-68	0	0	0	0	0	0	0	0	0
	3	-45	-76	23	245	67	-46	-45	-23	-433	-24	0	0	0	0	0	0	0	0	0	0									3	-135	-228	69	735	201	-138	-135	-69	-1299	-72	0	0	0	0	0	0	0	0	0
	4	-36	-65	67	345	345	-35	-35	-13	-312	-24	0	0	0	0	0	0	0	0	0	0									4	-144	-260	268	1380	1380	-140	-140	-52	-1248	-96	0	0	0	0	0	0	0	0	0
	5	45	4567	89	465	675	-23	-25	-11	-234	-15	0	0	0	0	0	0	0	0	0	0									5	225	22835	445	2325	3375	-115	-125	-55	-1170	-75	0	0	0	0	0	0	0	0	0
	6	0	0	0	0	0	0	0	0	0	0	0	0	0	0	0	0	0	0	0	0									6	0	0	0	0	0	0	0	0	0	0	0	0	0	0	0	0	0	0	0
	7	-40.4	638.8	15.8	224.4	195.2	-41.2	-43.2	-20.6	-417.8	-27.8	0	0	0	0	0	0	0	0	0	0									7	-282.8	4471.6	110.6	1570.8	1366.4	-288.4	-302.4	-144.2	-2924.6	-194.6	0	0	0	0	0	0	0	0	0
	8	-40.4	638.8	15.8	224.4	195.2	-41.2	-43.2	-20.6	-417.8	-27.8	0	0	0	0	0	0	0	0	0	0									8	-323.2	5110.4	126.4	1795.2	1561.6	-329.6	-345.6	-164.8	-3342.4	-222.4	0	0	0	0	0	0	0	0	0
	9	-40.4	638.8	15.8	224.4	195.2	-41.2	-43.2	-20.6	-417.8	-27.8	0	0	0	0	0	0	0	0	0	0									9	-363.6	5749.2	142.2	2019.6	1756.8	-370.8	-388.8	-185.4	-3760.2	-250.2	0	0	0	0	0	0	0	0	0
	10	-40.4	638.8	15.8	224.4	195.2	-41.2	-43.2	-20.6	-417.8	-27.8	0	0	0	0	0	0	0	0	0	0									10	-404	6388	158	2244	1952	-412	-432	-206	-4178	-278	0	0	0	0	0	0	0	0	0
	11	-40.4	638.8	15.8	224.4	195.2	-41.2	-43.2	-20.6	-417.8	-27.8	0	0	0	0	0	0	0	0	0	0									11	-444.4	7026.8	173.8	2468.4	2147.2	-453.2	-475.2	-226.6	-4595.8	-305.8	0	0	0	0	0	0	0	0	0
	12	0	0	0	0	0	0	0	0	0	0	0	0	0	0	0	0	0	0	0	0									12	0	0	0	0	0	0	0	0	0	0	0	0	0	0	0	0	0	0	0
	13	0	0	0	0	0	0	0	0	0	0	0	0	0	0	0	0	0	0	0	0									13	0	0	0	0	0	0	0	0	0	0	0	0	0	0	0	0	0	0	0
	14	0	0	0	0	0	0	0	0	0	0	0	0	0	0	0	0	0	0	0	0									14	0	0	0	0	0	0	0	0	0	0	0	0	0	0	0	0	0	0	0
	15	0	0	0	0	0	0	0	0	0	0	0	0	0	0	0	0	0	0	0	0									15	0	0	0	0	0	0	0	0	0	0	0	0	0	0	0	0	0	0	0
	16	0	0	0	0	0	0	0	0	0	0	0	0	0	0	0	0	0	0	0	0									16	0	0	0	0	0	0	0	0	0	0	0	0	0	0	0	0	0	0	0
	17	0	0	0	0	0	0	0	0	0	0	0	0	0	0	0	0	0	0	0	0									17	0	0	0	0	0	0	0	0	0	0	0	0	0	0	0	0	0	0	0
	18	0	0	0	0	0	0	0	0	0	0	0	0	0	0	0	0	0	0	0	0									18	0	0	0	0	0	0	0	0	0	0	0	0	0	0	0	0	0	0	0
	19	0	0	0	0	0	0	0	0	0	0	0	0	0	0	0	0	0	0	0	0									19	0	0	0	0	0	0	0	0	0	0	0	0	0	0	0	0	0	0	0
	20	0	0	0	0	0	0	0	0	0	0	0	0	0	0	0	0	0	0	0	0									20	0	0	0	0	0	0	0	0	0	0	0	0	0	0	0	0	0	0	0
	21	0	0	0	0	0	0	0	0	0	0	0	0	0	0	0	0	0	0	0	0									21	0	0	0	0	0	0	0	0	0	0	0	0	0	0	0	0	0	0	0
	22	0	0	0	0	0	0	0	0	0	0	0	0	0	0	0	0	0	0	0	0									22	0	0	0	0	0	0	0	0	0	0	0	0	0	0	0	0	0	0	0
	23	0	0	0	0	0	0	0	0	0	0	0	0	0	0	0	0	0	0	0	0									23	0	0	0	0	0	0	0	0	0	0	0	0	0	0	0	0	0	0	0
	24	0	0	0	0	0	0	0	0	0	0	0	0	0	0	0	0	0	0	0	0									24	0	0	0	0	0	0	0	0	0	0	0	0	0	0	0	0	0	0	0
	25	0	0	0	0	0	0	0	0	0	0	0	0	0	0	0	0	0	0	0	0									25	0	0	0	0	0	0	0	0	0	0	0	0	0	0	0	0	0	0	0
	26	0	0	0	0	0	0	0	0	0	0	0	0	0	0	0	0	0	0	0	0									26	0	0	0	0	0	0	0	0	0	0	0	0	0	0	0	0	0	0	0
	27	0	0	0	0	0	0	0	0	0	0	0	0	0	0	0	0	0	0	0	0									27	0	0	0	0	0	0	0	0	0	0	0	0	0	0	0	0	0	0	0
	28	0	0	0	0	0	0	0	0	0	0	0	0	0	0	0	0	0	0	0	0									28	0	0	0	0	0	0	0	0	0	0	0	0	0	0	0	0	0	0	0
	29	0	0	0	0	0	0	0	0	0	0	0	0	0	0	0	0	0	0	0	0									29	0	0	0	0	0	0	0	0	0	0	0	0	0	0	0	0	0	0	0
	30	0	0	0	0	0	0	0	0	0	0	0	0	0	0	0	0	0	0	0	0									30	0	0	0	0	0	0	0	0	0	0	0	0	0	0	0	0	0	0	0
	31	0	0	0	0	0	0	0	0	0	0	0	0	0	0	0	0	0	0	0	0									31	0	0	0	0	0	0	0	0	0	0	0	0	0	0	0	0	0	0	0
	32	0	0	0	0	0	0	0	0	0	0	0	0	0	0	0	0	0	0	0	0									32	0	0	0	0	0	0	0	0	0	0	0	0	0	0	0	0	0	0	0
	33	0	0	0	0	0	0	0	0	0	0	0	0	0	0	0	0	0	0	0	0									33	0	0	0	0	0	0	0	0	0	0	0	0	0	0	0	0	0	0	0
	34	0	0	0	0	0	0	0	0	0	0	0	0	0	0	0	0	0	0	0	0									34	0	0	0	0	0	0	0	0	0	0	0	0	0	0	0	0	0	0	0
	35	0	0	0	0	0	0	0	0	0	0	0	0	0	0	0	0	0	0	0	0									35	0	0	0	0	0	0	0	0	0	0	0	0	0	0	0	0	0	0	0
	36	0	0	0	0	0	0	0	0	0	0	0	0	0	0	0	0	0	0	0	0									36	0	0	0	0	0	0	0	0	0	0	0	0	0	0	0	0	0	0	0
	37	0	0	0	0	0	0	0	0	0	0	0	0	0	0	0	0	0	0	0	0									37	0	0	0	0	0	0	0	0	0	0	0	0	0	0	0	0	0	0	0
	38	0	0	0	0	0	0	0	0	0	0	0	0	0	0	0	0	0	0	0	0									38	0	0	0	0	0	0	0	0	0	0	0	0	0	0	0	0	0	0	0
	39	0	0	0	0	0	0	0	0	0	0	0	0	0	0	0	0	0	0	0	0									39	0	0	0	0	0	0	0	0	0	0	0	0	0	0	0	0	0	0	0
	40	0	0	0	0	0	0	0	0	0	0	0	0	0	0	0	0	0	0	0	0									40	0	0	0	0	0	0	0	0	0	0	0	0	0	0	0	0	0	0	0
	41	0	0	0	0	0	0	0	0	0	0	0	0	0	0	0	0	0	0	0	0									41	0	0	0	0	0	0	0	0	0	0	0	0	0	0	0	0	0	0	0
	42	0	0	0	0	0	0	0	0	0	0	0	0	0	0	0	0	0	0	0	0									42	0	0	0	0	0	0	0	0	0	0	0	0	0	0	0	0	0	0	0
	43	0	0	0	0	0	0	0	0	0	0	0	0	0	0	0	0	0	0	0	0									43	0	0	0	0	0	0	0	0	0	0	0	0	0	0	0	0	0	0	0
	44	0	0	0	0	0	0	0	0	0	0	0	0	0	0	0	0	0	0	0	0									44	0	0	0	0	0	0	0	0	0	0	0	0	0	0	0	0	0	0	0
	45	0	0	0	0	0	0	0	0	0	0	0	0	0	0	0	0	0	0	0	0									45	0	0	0	0	0	0	0	0	0	0	0	0	0	0	0	0	0	0	0
	46	0	0	0	0	0	0	0	0	0	0	0	0	0	0	0	0	0	0	0	0									46	0	0	0	0	0	0	0	0	0	0	0	0	0	0	0	0	0	0	0
	47	0	0	0	0	0	0	0	0	0	0	0	0	0	0	0	0	0	0	0	0									47	0	0	0	0	0	0	0	0	0	0	0	0	0	0	0	0	0	0	0
	48	0	0	0	0	0	0	0	0	0	0	0	0	0	0	0	0	0	0	0	0									48	0	0	0	0	0	0	0	0	0	0	0	0	0	0	0	0	0	0	0
	49	0	0	0	0	0	0	0	0	0	0	0	0	0	0	0	0	0	0	0	0									49	0	0	0	0	0	0	0	0	0	0	0	0	0	0	0	0	0	0	0
	50	0	0	0	0	0	0	0	0	0	0	0	0	0	0	0	0	0	0	0	0									50	0	0	0	0	0	0	0	0	0	0	0	0	0	0	0	0	0	0	0
	51	0	0	0	0	0	0	0	0	0	0	0	0	0	0	0	0	0	0	0	0									51	0	0	0	0	0	0	0	0	0	0	0	0	0	0	0	0	0	0	0
	52	0	0	0	0	0	0	0	0	0	0	0	0	0	0	0	0	0	0	0	0									52	0	0	0	0	0	0	0	0	0	0	0	0	0	0	0	0	0	0	0
	53	0	0	0	0	0	0	0	0	0	0	0	0	0	0	0	0	0	0	0	0									53	0	0	0	0	0	0	0	0	0	0	0	0	0	0	0	0	0	0	0
	54	0	0	0	0	0	0	0	0	0	0	0	0	0	0	0	0	0	0	0	0									54	0	0	0	0	0	0	0	0	0	0	0	0	0	0	0	0	0	0	0
	55	0	0	0	0	0	0	0	0	0	0	0	0	0	0	0	0	0	0	0	0									55	0	0	0	0	0	0	0	0	0	0	0	0	0	0	0	0	0	0	0
	56	0	0	0	0	0	0	0	0	0	0	0	0	0	0	0	0	0	0	0	0									56	0	0	0	0	0	0	0	0	0	0	0	0	0	0	0	0	0	0	0
	57	0	0	0	0	0	0	0	0	0	0	0	0	0	0	0	0	0	0	0	0									57	0	0	0	0	0	0	0	0	0	0	0	0	0	0	0	0	0	0	0
	58	0	0	0	0	0	0	0	0	0	0	0	0	0	0	0	0	0	0	0	0									58	0	0	0	0	0	0	0	0	0	0	0	0	0	0	0	0	0	0	0
	59	0	0	0	0	0	0	0	0	0	0	0	0	0	0	0	0	0	0	0	0									59	0	0	0	0	0	0	0	0	0	0	0	0	0	0	0	0	0	0	0
	60	0	0	0	0	0	0	0	0	0	0	0	0	0	0	0	0	0	0	0	0									60	0	0	0	0	0	0	0	0	0	0	0	0	0	0	0	0	0	0	0
	61	0	0	0	0	0	0	0	0	0	0	0	0	0	0	0	0	0	0	0	0									61	0	0	0	0	0	0	0	0	0	0	0	0	0	0	0	0	0	0	0
	62	0	0	0	0	0	0	0	0	0	0	0	0	0	0	0	0	0	0	0	0									62	0	0	0	0	0	0	0	0	0	0	0	0	0	0	0	0	0	0	0
	63	0	0	0	0	0	0	0	0	0	0	0	0	0	0	0	0	0	0	0	0									63	0	0	0	0	0	0	0	0	0	0	0	0	0	0	0	0	0	0	0
	64	0	0	0	0	0	0	0	0	0	0	0	0	0	0	0	0	0	0	0	0									64	0	0	0	0	0	0	0	0	0	0	0	0	0	0	0	0	0	0	0
	65	0	0	0	0	0	0	0	0	0	0	0	0	0	0	0	0	0	0	0	0									65	0	0	0	0	0	0	0	0	0	0	0	0	0	0	0	0	0	0	0
	66	0	0	0	0	0	0	0	0	0	0	0	0	0	0	0	0	0	0	0	0									66	0	0	0	0	0	0	0	0	0	0	0	0	0	0	0	0	0	0	0
	67	0	0	0	0	0	0	0	0	0	0	0	0	0	0	0	0	0	0	0	0									67	0	0	0	0	0	0	0	0	0	0	0	0	0	0	0	0	0	0	0
	68	0	0	0	0	0	0	0	0	0	0	0	0	0	0	0	0	0	0	0	0									68	0	0	0	0	0	0	0	0	0	0	0	0	0	0	0	0	0	0	0
	69	0	0	0	0	0	0	0	0	0	0	0	0	0	0	0	0	0	0	0	0									69	0	0	0	0	0	0	0	0	0	0	0	0	0	0	0	0	0	0	0
	70	0	0	0	0	0	0	0	0	0	0	0	0	0	0	0	0	0	0	0	0									70	0	0	0	0	0	0	0	0	0	0	0	0	0	0	0	0	0	0	0
	71	0	0	0	0	0	0	0	0	0	0	0	0	0	0	0	0	0	0	0	0									71	0	0	0	0	0	0	0	0	0	0	0	0	0	0	0	0	0	0	0
	72	0	0	0	0	0	0	0	0	0	0	0	0	0	0	0	0	0	0	0	0									72	0	0	0	0	0	0	0	0	0	0	0	0	0	0	0	0	0	0	0
	73	0	0	0	0	0	0	0	0	0	0	0	0	0	0	0	0	0	0	0	0									73	0	0	0	0	0	0	0	0	0	0	0	0	0	0	0	0	0	0	0
	74	0	0	0	0	0	0	0	0	0	0	0	0	0	0	0	0	0	0	0	0									74	0	0	0	0	0	0	0	0	0	0	0	0	0	0	0	0	0	0	0
	75	0	0	0	0	0	0	0	0	0	0	0	0	0	0	0	0	0	0	0	0									75	0	0	0	0	0	0	0	0	0	0	0	0	0	0	0	0	0	0	0
	76	0	0	0	0	0	0	0	0	0	0	0	0	0	0	0	0	0	0	0	0									76	0	0	0	0	0	0	0	0	0	0	0	0	0	0	0	0	0	0	0
	77	0	0	0	0	0	0	0	0	0	0	0	0	0	0	0	0	0	0	0	0									77	0	0	0	0	0	0	0	0	0	0	0	0	0	0	0	0	0	0	0
	78	0	0	0	0	0	0	0	0	0	0	0	0	0	0	0	0	0	0	0	0									78	0	0	0	0	0	0	0	0	0	0	0	0	0	0	0	0	0	0	0
	79	0	0	0	0	0	0	0	0	0	0	0	0	0	0	0	0	0	0	0	0									79	0	0	0	0	0	0	0	0	0	0	0	0	0	0	0	0	0	0	0
	80	0	0	0	0	0	0	0	0	0	0	0	0	0	0	0	0	0	0	0	0									80	0	0	0	0	0	0	0	0	0	0	0	0	0	0	0	0	0	0	0
	81	0	0	0	0	0	0	0	0	0	0	0	0	0	0	0	0	0	0	0	0									81	0	0	0	0	0	0	0	0	0	0	0	0	0	0	0	0	0	0	0
	82	0	0	0	0	0	0	0	0	0	0	0	0	0	0	0	0	0	0	0	0									82	0	0	0	0	0	0	0	0	0	0	0	0	0	0	0	0	0	0	0
	83	0	0	0	0	0	0	0	0	0	0	0	0	0	0	0	0	0	0	0	0									83	0	0	0	0	0	0	0	0	0	0	0	0	0	0	0	0	0	0	0
	84	0	0	0	0	0	0	0	0	0	0	0	0	0	0	0	0	0	0	0	0									84	0	0	0	0	0	0	0	0	0	0	0	0	0	0	0	0	0	0	0
	85	0	0	0	0	0	0	0	0	0	0	0	0	0	0	0	0	0	0	0	0									85	0	0	0	0	0	0	0	0	0	0	0	0	0	0	0	0	0	0	0
	86	0	0	0	0	0	0	0	0	0	0	0	0	0	0	0	0	0	0	0	0									86	0	0	0	0	0	0	0	0	0	0	0	0	0	0	0	0	0	0	0
	87	0	0	0	0	0	0	0	0	0	0	0	0	0	0	0	0	0	0	0	0									87	0	0	0	0	0	0	0	0	0	0	0	0	0	0	0	0	0	0	0
	88	0	0	0	0	0	0	0	0	0	0	0	0	0	0	0	0	0	0	0	0									88	0	0	0	0	0	0	0	0	0	0	0	0	0	0	0	0	0	0	0
	89	0	0	0	0	0	0	0	0	0	0	0	0	0	0	0	0	0	0	0	0									89	0	0	0	0	0	0	0	0	0	0	0	0	0	0	0	0	0	0	0
	90	0	0	0	0	0	0	0	0	0	0	0	0	0	0	0	0	0	0	0	0									90	0	0	0	0	0	0	0	0	0	0	0	0	0	0	0	0	0	0	0
	91	0	0	0	0	0	0	0	0	0	0	0	0	0	0	0	0	0	0	0	0									91	0	0	0	0	0	0	0	0	0	0	0	0	0	0	0	0	0	0	0
	92	0	0	0	0	0	0	0	0	0	0	0	0	0	0	0	0	0	0	0	0									92	0	0	0	0	0	0	0	0	0	0	0	0	0	0	0	0	0	0	0
	93	0	0	0	0	0	0	0	0	0	0	0	0	0	0	0	0	0	0	0	0									93	0	0	0	0	0	0	0	0	0	0	0	0	0	0	0	0	0	0	0
	94	0	0	0	0	0	0	0	0	0	0	0	0	0	0	0	0	0	0	0	0									94	0	0	0	0	0	0	0	0	0	0	0	0	0	0	0	0	0	0	0
	95	0	0	0	0	0	0	0	0	0	0	0	0	0	0	0	0	0	0	0	0									95	0	0	0	0	0	0	0	0	0	0	0	0	0	0	0	0	0	0	0
	96	0	0	0	0	0	0	0	0	0	0	0	0	0	0	0	0	0	0	0	0									96	0	0	0	0	0	0	0	0	0	0	0	0	0	0	0	0	0	0	0
	97	0	0	0	0	0	0	0	0	0	0	0	0	0	0	0	0	0	0	0	0									97	0	0	0	0	0	0	0	0	0	0	0	0	0	0	0	0	0	0	0
	98	0	0	0	0	0	0	0	0	0	0	0	0	0	0	0	0	0	0	0	0									98	0	0	0	0	0	0	0	0	0	0	0	0	0	0	0	0	0	0	0
	99	0	0	0	0	0	0	0	0	0	0	0	0	0	0	0	0	0	0	0	0									99	0	0	0	0	0	0	0	0	0	0	0	0	0	0	0	0	0	0	0
	100	0	0	0	0	0	0	0	0	0	0	0	0	0	0	0	0	0	0	0	0									100	0	0	0	0	0	0	0	0	0	0	0	0	0	0	0	0	0	0	0
	101	0	0	0	0	0	0	0	0	0	0	0	0	0	0	0	0	0	0	0	0									101	0	0	0	0	0	0	0	0	0	0	0	0	0	0	0	0	0	0	0
	102	0	0	0	0	0	0	0	0	0	0	0	0	0	0	0	0	0	0	0	0									102	0	0	0	0	0	0	0	0	0	0	0	0	0	0	0	0	0	0	0
	103	0	0	0	0	0	0	0	0	0	0	0	0	0	0	0	0	0	0	0	0									103	0	0	0	0	0	0	0	0	0	0	0	0	0	0	0	0	0	0	0
	104	0	0	0	0	0	0	0	0	0	0	0	0	0	0	0	0	0	0	0	0									104	0	0	0	0	0	0	0	0	0	0	0	0	0	0	0	0	0	0	0
	105	0	0	0	0	0	0	0	0	0	0	0	0	0	0	0	0	0	0	0	0									105	0	0	0	0	0	0	0	0	0	0	0	0	0	0	0	0	0	0	0
	106	0	0	0	0	0	0	0	0	0	0	0	0	0	0	0	0	0	0	0	0									106	0	0	0	0	0	0	0	0	0	0	0	0	0	0	0	0	0	0	0
	107	0	0	0	0	0	0	0	0	0	0	0	0	0	0	0	0	0	0	0	0									107	0	0	0	0	0	0	0	0	0	0	0	0	0	0	0	0	0	0	0
	108	0	0	0	0	0	0	0	0	0	0	0	0	0	0	0	0	0	0	0	0									108	0	0	0	0	0	0	0	0	0	0	0	0	0	0	0	0	0	0	0
	109	0	0	0	0	0	0	0	0	0	0	0	0	0	0	0	0	0	0	0	0									109	0	0	0	0	0	0	0	0	0	0	0	0	0	0	0	0	0	0	0
	110	0	0	0	0	0	0	0	0	0	0	0	0	0	0	0	0	0	0	0	0									110	0	0	0	0	0	0	0	0	0	0	0	0	0	0	0	0	0	0	0
	111	0	0	0	0	0	0	0	0	0	0	0	0	0	0	0	0	0	0	0	0									111	0	0	0	0	0	0	0	0	0	0	0	0	0	0	0	0	0	0	0
	112	0	0	0	0	0	0	0	0	0	0	0	0	0	0	0	0	0	0	0	0									112	0	0	0	0	0	0	0	0	0	0	0	0	0	0	0	0	0	0	0
	113	0	0	0	0	0	0	0	0	0	0	0	0	0	0	0	0	0	0	0	0									113	0	0	0	0	0	0	0	0	0	0	0	0	0	0	0	0	0	0	0
	114	0	0	0	0	0	0	0	0	0	0	0	0	0	0	0	0	0	0	0	0									114	0	0	0	0	0	0	0	0	0	0	0	0	0	0	0	0	0	0	0
	115	0	0	0	0	0	0	0	0	0	0	0	0	0	0	0	0	0	0	0	0									115	0	0	0	0	0	0	0	0	0	0	0	0	0	0	0	0	0	0	0
	116	0	0	0	0	0	0	0	0	0	0	0	0	0	0	0	0	0	0	0	0									116	0	0	0	0	0	0	0	0	0	0	0	0	0	0	0	0	0	0	0
	117	0	0	0	0	0	0	0	0	0	0	0	0	0	0	0	0	0	0	0	0									117	0	0	0	0	0	0	0	0	0	0	0	0	0	0	0	0	0	0	0
	118	0	0	0	0	0	0	0	0	0	0	0	0	0	0	0	0	0	0	0	0									118	0	0	0	0	0	0	0	0	0	0	0	0	0	0	0	0	0	0	0
	119	0	0	0	0	0	0	0	0	0	0	0	0	0	0	0	0	0	0	0	0									119	0	0	0	0	0	0	0	0	0	0	0	0	0	0	0	0	0	0	0
	120	0	0	0	0	0	0	0	0	0	0	0	0	0	0	0	0	0	0	0	0									120	0	0	0	0	0	0	0	0	0	0	0	0	0	0	0	0	0	0	0
	121	0	0	0	0	0	0	0	0	0	0	0	0	0	0	0	0	0	0	0	0									121	0	0	0	0	0	0	0	0	0	0	0	0	0	0	0	0	0	0	0
	122	0	0	0	0	0	0	0	0	0	0	0	0	0	0	0	0	0	0	0	0									122	0	0	0	0	0	0	0	0	0	0	0	0	0	0	0	0	0	0	0
	123	0	0	0	0	0	0	0	0	0	0	0	0	0	0	0	0	0	0	0	0									123	0	0	0	0	0	0	0	0	0	0	0	0	0	0	0	0	0	0	0
	124	0	0	0	0	0	0	0	0	0	0	0	0	0	0	0	0	0	0	0	0									124	0	0	0	0	0	0	0	0	0	0	0	0	0	0	0	0	0	0	0
	125	0	0	0	0	0	0	0	0	0	0	0	0	0	0	0	0	0	0	0	0									125	0	0	0	0	0	0	0	0	0	0	0	0	0	0	0	0	0	0	0
	126	0	0	0	0	0	0	0	0	0	0	0	0	0	0	0	0	0	0	0	0									126	0	0	0	0	0	0	0	0	0	0	0	0	0	0	0	0	0	0	0
	127	0	0	0	0	0	0	0	0	0	0	0	0	0	0	0	0	0	0	0	0									127	0	0	0	0	0	0	0	0	0	0	0	0	0	0	0	0	0	0	0
	128	0	0	0	0	0	0	0	0	0	0	0	0	0	0	0	0	0	0	0	0									128	0	0	0	0	0	0	0	0	0	0	0	0	0	0	0	0	0	0	0
	129	0	0	0	0	0	0	0	0	0	0	0	0	0	0	0	0	0	0	0	0									129	0	0	0	0	0	0	0	0	0	0	0	0	0	0	0	0	0	0	0
	130	0	0	0	0	0	0	0	0	0	0	0	0	0	0	0	0	0	0	0	0									130	0	0	0	0	0	0	0	0	0	0	0	0	0	0	0	0	0	0	0
	131	0	0	0	0	0	0	0	0	0	0	0	0	0	0	0	0	0	0	0	0									131	0	0	0	0	0	0	0	0	0	0	0	0	0	0	0	0	0	0	0
	132	0	0	0	0	0	0	0	0	0	0	0	0	0	0	0	0	0	0	0	0									132	0	0	0	0	0	0	0	0	0	0	0	0	0	0	0	0	0	0	0
	133	0	0	0	0	0	0	0	0	0	0	0	0	0	0	0	0	0	0	0	0									133	0	0	0	0	0	0	0	0	0	0	0	0	0	0	0	0	0	0	0
	134	0	0	0	0	0	0	0	0	0	0	0	0	0	0	0	0	0	0	0	0									134	0	0	0	0	0	0	0	0	0	0	0	0	0	0	0	0	0	0	0
	135	0	0	0	0	0	0	0	0	0	0	0	0	0	0	0	0	0	0	0	0									135	0	0	0	0	0	0	0	0	0	0	0	0	0	0	0	0	0	0	0
	136	0	0	0	0	0	0	0	0	0	0	0	0	0	0	0	0	0	0	0	0									136	0	0	0	0	0	0	0	0	0	0	0	0	0	0	0	0	0	0	0
	137	0	0	0	0	0	0	0	0	0	0	0	0	0	0	0	0	0	0	0	0									137	0	0	0	0	0	0	0	0	0	0	0	0	0	0	0	0	0	0	0
	138	0	0	0	0	0	0	0	0	0	0	0	0	0	0	0	0	0	0	0	0									138	0	0	0	0	0	0	0	0	0	0	0	0	0	0	0	0	0	0	0
	139	0	0	0	0	0	0	0	0	0	0	0	0	0	0	0	0	0	0	0	0									139	0	0	0	0	0	0	0	0	0	0	0	0	0	0	0	0	0	0	0
	140	0	0	0	0	0	0	0	0	0	0	0	0	0	0	0	0	0	0	0	0									140	0	0	0	0	0	0	0	0	0	0	0	0	0	0	0	0	0	0	0
	141	0	0	0	0	0	0	0	0	0	0	0	0	0	0	0	0	0	0	0	0									141	0	0	0	0	0	0	0	0	0	0	0	0	0	0	0	0	0	0	0
	142	0	0	0	0	0	0	0	0	0	0	0	0	0	0	0	0	0	0	0	0									142	0	0	0	0	0	0	0	0	0	0	0	0	0	0	0	0	0	0	0
	143	0	0	0	0	0	0	0	0	0	0	0	0	0	0	0	0	0	0	0	0									143	0	0	0	0	0	0	0	0	0	0	0	0	0	0	0	0	0	0	0
	144	0	0	0	0	0	0	0	0	0	0	0	0	0	0	0	0	0	0	0	0									144	0	0	0	0	0	0	0	0	0	0	0	0	0	0	0	0	0	0	0
	145	0	0	0	0	0	0	0	0	0	0	0	0	0	0	0	0	0	0	0	0									145	0	0	0	0	0	0	0	0	0	0	0	0	0	0	0	0	0	0	0
	146	0	0	0	0	0	0	0	0	0	0	0	0	0	0	0	0	0	0	0	0									146	0	0	0	0	0	0	0	0	0	0	0	0	0	0	0	0	0	0	0
	147	0	0	0	0	0	0	0	0	0	0	0	0	0	0	0	0	0	0	0	0									147	0	0	0	0	0	0	0	0	0	0	0	0	0	0	0	0	0	0	0
	148	0	0	0	0	0	0	0	0	0	0	0	0	0	0	0	0	0	0	0	0									148	0	0	0	0	0	0	0	0	0	0	0	0	0	0	0	0	0	0	0
	149	0	0	0	0	0	0	0	0	0	0	0	0	0	0	0	0	0	0	0	0									149	0	0	0	0	0	0	0	0	0	0	0	0	0	0	0	0	0	0	0
	150	0	0	0	0	0	0	0	0	0	0	0	0	0	0	0	0	0	0	0	0									150	0	0	0	0	0	0	0	0	0	0	0	0	0	0	0	0	0	0	0
	151	0	0	0	0	0	0	0	0	0	0	0	0	0	0	0	0	0	0	0	0									151	0	0	0	0	0	0	0	0	0	0	0	0	0	0	0	0	0	0	0
	152	0	0	0	0	0	0	0	0	0	0	0	0	0	0	0	0	0	0	0	0									152	0	0	0	0	0	0	0	0	0	0	0	0	0	0	0	0	0	0	0
	153	0	0	0	0	0	0	0	0	0	0	0	0	0	0	0	0	0	0	0	0									153	0	0	0	0	0	0	0	0	0	0	0	0	0	0	0	0	0	0	0
	154	0	0	0	0	0	0	0	0	0	0	0	0	0	0	0	0	0	0	0	0									154	0	0	0	0	0	0	0	0	0	0	0	0	0	0	0	0	0	0	0
	155	0	0	0	0	0	0	0	0	0	0	0	0	0	0	0	0	0	0	0	0									155	0	0	0	0	0	0	0	0	0	0	0	0	0	0	0	0	0	0	0
	156	0	0	0	0	0	0	0	0	0	0	0	0	0	0	0	0	0	0	0	0									156	0	0	0	0	0	0	0	0	0	0	0	0	0	0	0	0	0	0	0
	157	0	0	0	0	0	0	0	0	0	0	0	0	0	0	0	0	0	0	0	0									157	0	0	0	0	0	0	0	0	0	0	0	0	0	0	0	0	0	0	0
	158	0	0	0	0	0	0	0	0	0	0	0	0	0	0	0	0	0	0	0	0									158	0	0	0	0	0	0	0	0	0	0	0	0	0	0	0	0	0	0	0
	159	0	0	0	0	0	0	0	0	0	0	0	0	0	0	0	0	0	0	0	0									159	0	0	0	0	0	0	0	0	0	0	0	0	0	0	0	0	0	0	0
	160	0	0	0	0	0	0	0	0	0	0	0	0	0	0	0	0	0	0	0	0									160	0	0	0	0	0	0	0	0	0	0	0	0	0	0	0	0	0	0	0
	161	0	0	0	0	0	0	0	0	0	0	0	0	0	0	0	0	0	0	0	0									161	0	0	0	0	0	0	0	0	0	0	0	0	0	0	0	0	0	0	0
	162	0	0	0	0	0	0	0	0	0	0	0	0	0	0	0	0	0	0	0	0									162	0	0	0	0	0	0	0	0	0	0	0	0	0	0	0	0	0	0	0
	163	0	0	0	0	0	0	0	0	0	0	0	0	0	0	0	0	0	0	0	0									163	0	0	0	0	0	0	0	0	0	0	0	0	0	0	0	0	0	0	0
	164	0	0	0	0	0	0	0	0	0	0	0	0	0	0	0	0	0	0	0	0									164	0	0	0	0	0	0	0	0	0	0	0	0	0	0	0	0	0	0	0
	165	0	0	0	0	0	0	0	0	0	0	0	0	0	0	0	0	0	0	0	0									165	0	0	0	0	0	0	0	0	0	0	0	0	0	0	0	0	0	0	0
	166	0	0	0	0	0	0	0	0	0	0	0	0	0	0	0	0	0	0	0	0									166	0	0	0	0	0	0	0	0	0	0	0	0	0	0	0	0	0	0	0
	167	0	0	0	0	0	0	0	0	0	0	0	0	0	0	0	0	0	0	0	0									167	0	0	0	0	0	0	0	0	0	0	0	0	0	0	0	0	0	0	0
	168	0	0	0	0	0	0	0	0	0	0	0	0	0	0	0	0	0	0	0	0									168	0	0	0	0	0	0	0	0	0	0	0	0	0	0	0	0	0	0	0
	169	0	0	0	0	0	0	0	0	0	0	0	0	0	0	0	0	0	0	0	0									169	0	0	0	0	0	0	0	0	0	0	0	0	0	0	0	0	0	0	0
	170	0	0	0	0	0	0	0	0	0	0	0	0	0	0	0	0	0	0	0	0									170	0	0	0	0	0	0	0	0	0	0	0	0	0	0	0	0	0	0	0
	171	0	0	0	0	0	0	0	0	0	0	0	0	0	0	0	0	0	0	0	0									171	0	0	0	0	0	0	0	0	0	0	0	0	0	0	0	0	0	0	0
	172	0	0	0	0	0	0	0	0	0	0	0	0	0	0	0	0	0	0	0	0									172	0	0	0	0	0	0	0	0	0	0	0	0	0	0	0	0	0	0	0
	173	0	0	0	0	0	0	0	0	0	0	0	0	0	0	0	0	0	0	0	0									173	0	0	0	0	0	0	0	0	0	0	0	0	0	0	0	0	0	0	0
	174	0	0	0	0	0	0	0	0	0	0	0	0	0	0	0	0	0	0	0	0									174	0	0	0	0	0	0	0	0	0	0	0	0	0	0	0	0	0	0	0
	175	0	0	0	0	0	0	0	0	0	0	0	0	0	0	0	0	0	0	0	0									175	0	0	0	0	0	0	0	0	0	0	0	0	0	0	0	0	0	0	0
	176	0	0	0	0	0	0	0	0	0	0	0	0	0	0	0	0	0	0	0	0									176	0	0	0	0	0	0	0	0	0	0	0	0	0	0	0	0	0	0	0
	177	0	0	0	0	0	0	0	0	0	0	0	0	0	0	0	0	0	0	0	0									177	0	0	0	0	0	0	0	0	0	0	0	0	0	0	0	0	0	0	0
	178	0	0	0	0	0	0	0	0	0	0	0	0	0	0	0	0	0	0	0	0									178	0	0	0	0	0	0	0	0	0	0	0	0	0	0	0	0	0	0	0
	179	0	0	0	0	0	0	0	0	0	0	0	0	0	0	0	0	0	0	0	0									179	0	0	0	0	0	0	0	0	0	0	0	0	0	0	0	0	0	0	0
	180	0	0	0	0	0	0	0	0	0	0	0	0	0	0	0	0	0	0	0	0									180	0	0	0	0	0	0	0	0	0	0	0	0	0	0	0	0	0	0	0
	181	0	0	0	0	0	0	0	0	0	0	0	0	0	0	0	0	0	0	0	0									181	0	0	0	0	0	0	0	0	0	0	0	0	0	0	0	0	0	0	0
	182	0	0	0	0	0	0	0	0	0	0	0	0	0	0	0	0	0	0	0	0									182	0	0	0	0	0	0	0	0	0	0	0	0	0	0	0	0	0	0	0
	183	0	0	0	0	0	0	0	0	0	0	0	0	0	0	0	0	0	0	0	0									183	0	0	0	0	0	0	0	0	0	0	0	0	0	0	0	0	0	0	0
	184	0	0	0	0	0	0	0	0	0	0	0	0	0	0	0	0	0	0	0	0									184	0	0	0	0	0	0	0	0	0	0	0	0	0	0	0	0	0	0	0
	185	0	0	0	0	0	0	0	0	0	0	0	0	0	0	0	0	0	0	0	0									185	0	0	0	0	0	0	0	0	0	0	0	0	0	0	0	0	0	0	0
	186	0	0	0	0	0	0	0	0	0	0	0	0	0	0	0	0	0	0	0	0									186	0	0	0	0	0	0	0	0	0	0	0	0	0	0	0	0	0	0	0
	187	0	0	0	0	0	0	0	0	0	0	0	0	0	0	0	0	0	0	0	0									187	0	0	0	0	0	0	0	0	0	0	0	0	0	0	0	0	0	0	0
	188	0	0	0	0	0	0	0	0	0	0	0	0	0	0	0	0	0	0	0	0									188	0	0	0	0	0	0	0	0	0	0	0	0	0	0	0	0	0	0	0
	189	0	0	0	0	0	0	0	0	0	0	0	0	0	0	0	0	0	0	0	0									189	0	0	0	0	0	0	0	0	0	0	0	0	0	0	0	0	0	0	0
	190	0	0	0	0	0	0	0	0	0	0	0	0	0	0	0	0	0	0	0	0									190	0	0	0	0	0	0	0	0	0	0	0	0	0	0	0	0	0	0	0
	191	0	0	0	0	0	0	0	0	0	0	0	0	0	0	0	0	0	0	0	0									191	0	0	0	0	0	0	0	0	0	0	0	0	0	0	0	0	0	0	0
	192	0	0	0	0	0	0	0	0	0	0	0	0	0	0	0	0	0	0	0	0									192	0	0	0	0	0	0	0	0	0	0	0	0	0	0	0	0	0	0	0
	193	0	0	0	0	0	0	0	0	0	0	0	0	0	0	0	0	0	0	0	0									193	0	0	0	0	0	0	0	0	0	0	0	0	0	0	0	0	0	0	0
	194	0	0	0	0	0	0	0	0	0	0	0	0	0	0	0	0	0	0	0	0									194	0	0	0	0	0	0	0	0	0	0	0	0	0	0	0	0	0	0	0
	195	0	0	0	0	0	0	0	0	0	0	0	0	0	0	0	0	0	0	0	0									195	0	0	0	0	0	0	0	0	0	0	0	0	0	0	0	0	0	0	0
	196	0	0	0	0	0	0	0	0	0	0	0	0	0	0	0	0	0	0	0	0									196	0	0	0	0	0	0	0	0	0	0	0	0	0	0	0	0	0	0	0
	197	0	0	0	0	0	0	0	0	0	0	0	0	0	0	0	0	0	0	0	0									197	0	0	0	0	0	0	0	0	0	0	0	0	0	0	0	0	0	0	0
	198	0	0	0	0	0	0	0	0	0	0	0	0	0	0	0	0	0	0	0	0									198	0	0	0	0	0	0	0	0	0	0	0	0	0	0	0	0	0	0	0
	199	0	0	0	0	0	0	0	0	0	0	0	0	0	0	0	0	0	0	0	0									199	0	0	0	0	0	0	0	0	0	0	0	0	0	0	0	0	0	0	0
	200	0	0	0	0	0	0	0	0	0	0	0	0	0	0	0	0	0	0	0	0									200	0	0	0	0	0	0	0	0	0	0	0	0	0	0	0	0	0	0	0
	201	0	0	0	0	0	0	0	0	0	0	0	0	0	0	0	0	0	0	0	0									201	0	0	0	0	0	0	0	0	0	0	0	0	0	0	0	0	0	0	0
	202	0	0	0	0	0	0	0	0	0	0	0	0	0	0	0	0	0	0	0	0									202	0	0	0	0	0	0	0	0	0	0	0	0	0	0	0	0	0	0	0
	203	0	0	0	0	0	0	0	0	0	0	0	0	0	0	0	0	0	0	0	0									203	0	0	0	0	0	0	0	0	0	0	0	0	0	0	0	0	0	0	0
	204	0	0	0	0	0	0	0	0	0	0	0	0	0	0	0	0	0	0	0	0									204	0	0	0	0	0	0	0	0	0	0	0	0	0	0	0	0	0	0	0
	205	0	0	0	0	0	0	0	0	0	0	0	0	0	0	0	0	0	0	0	0									205	0	0	0	0	0	0	0	0	0	0	0	0	0	0	0	0	0	0	0
	206	0	0	0	0	0	0	0	0	0	0	0	0	0	0	0	0	0	0	0	0									206	0	0	0	0	0	0	0	0	0	0	0	0	0	0	0	0	0	0	0
	207	0	0	0	0	0	0	0	0	0	0	0	0	0	0	0	0	0	0	0	0									207	0	0	0	0	0	0	0	0	0	0	0	0	0	0	0	0	0	0	0
	208	0	0	0	0	0	0	0	0	0	0	0	0	0	0	0	0	0	0	0	0									208	0	0	0	0	0	0	0	0	0	0	0	0	0	0	0	0	0	0	0
	209	0	0	0	0	0	0	0	0	0	0	0	0	0	0	0	0	0	0	0	0									209	0	0	0	0	0	0	0	0	0	0	0	0	0	0	0	0	0	0	0
	210	0	0	0	0	0	0	0	0	0	0	0	0	0	0	0	0	0	0	0	0									210	0	0	0	0	0	0	0	0	0	0	0	0	0	0	0	0	0	0	0
	211	0	0	0	0	0	0	0	0	0	0	0	0	0	0	0	0	0	0	0	0									211	0	0	0	0	0	0	0	0	0	0	0	0	0	0	0	0	0	0	0
	212	0	0	0	0	0	0	0	0	0	0	0	0	0	0	0	0	0	0	0	0									212	0	0	0	0	0	0	0	0	0	0	0	0	0	0	0	0	0	0	0
	213	0	0	0	0	0	0	0	0	0	0	0	0	0	0	0	0	0	0	0	0									213	0	0	0	0	0	0	0	0	0	0	0	0	0	0	0	0	0	0	0
	214	0	0	0	0	0	0	0	0	0	0	0	0	0	0	0	0	0	0	0	0									214	0	0	0	0	0	0	0	0	0	0	0	0	0	0	0	0	0	0	0
	215	0	0	0	0	0	0	0	0	0	0	0	0	0	0	0	0	0	0	0	0									215	0	0	0	0	0	0	0	0	0	0	0	0	0	0	0	0	0	0	0
	216	0	0	0	0	0	0	0	0	0	0	0	0	0	0	0	0	0	0	0	0									216	0	0	0	0	0	0	0	0	0	0	0	0	0	0	0	0	0	0	0
	217	0	0	0	0	0	0	0	0	0	0	0	0	0	0	0	0	0	0	0	0									217	0	0	0	0	0	0	0	0	0	0	0	0	0	0	0	0	0	0	0
	218	0	0	0	0	0	0	0	0	0	0	0	0	0	0	0	0	0	0	0	0									218	0	0	0	0	0	0	0	0	0	0	0	0	0	0	0	0	0	0	0
	219	0	0	0	0	0	0	0	0	0	0	0	0	0	0	0	0	0	0	0	0									219	0	0	0	0	0	0	0	0	0	0	0	0	0	0	0	0	0	0	0
	220	0	0	0	0	0	0	0	0	0	0	0	0	0	0	0	0	0	0	0	0									220	0	0	0	0	0	0	0	0	0	0	0	0	0	0	0	0	0	0	0
	221	0	0	0	0	0	0	0	0	0	0	0	0	0	0	0	0	0	0	0	0									221	0	0	0	0	0	0	0	0	0	0	0	0	0	0	0	0	0	0	0
	222	0	0	0	0	0	0	0	0	0	0	0	0	0	0	0	0	0	0	0	0									222	0	0	0	0	0	0	0	0	0	0	0	0	0	0	0	0	0	0	0
	223	0	0	0	0	0	0	0	0	0	0	0	0	0	0	0	0	0	0	0	0									223	0	0	0	0	0	0	0	0	0	0	0	0	0	0	0	0	0	0	0
	224	0	0	0	0	0	0	0	0	0	0	0	0	0	0	0	0	0	0	0	0									224	0	0	0	0	0	0	0	0	0	0	0	0	0	0	0	0	0	0	0
	225	0	0	0	0	0	0	0	0	0	0	0	0	0	0	0	0	0	0	0	0									225	0	0	0	0	0	0	0	0	0	0	0	0	0	0	0	0	0	0	0
	226	0	0	0	0	0	0	0	0	0	0	0	0	0	0	0	0	0	0	0	0									226	0	0	0	0	0	0	0	0	0	0	0	0	0	0	0	0	0	0	0
	227	0	0	0	0	0	0	0	0	0	0	0	0	0	0	0	0	0	0	0	0									227	0	0	0	0	0	0	0	0	0	0	0	0	0	0	0	0	0	0	0
	228	0	0	0	0	0	0	0	0	0	0	0	0	0	0	0	0	0	0	0	0									228	0	0	0	0	0	0	0	0	0	0	0	0	0	0	0	0	0	0	0
	229	0	0	0	0	0	0	0	0	0	0	0	0	0	0	0	0	0	0	0	0									229	0	0	0	0	0	0	0	0	0	0	0	0	0	0	0	0	0	0	0
	230	0	0	0	0	0	0	0	0	0	0	0	0	0	0	0	0	0	0	0	0									230	0	0	0	0	0	0	0	0	0	0	0	0	0	0	0	0	0	0	0
	231	0	0	0	0	0	0	0	0	0	0	0	0	0	0	0	0	0	0	0	0									231	0	0	0	0	0	0	0	0	0	0	0	0	0	0	0	0	0	0	0
	232	0	0	0	0	0	0	0	0	0	0	0	0	0	0	0	0	0	0	0	0									232	0	0	0	0	0	0	0	0	0	0	0	0	0	0	0	0	0	0	0
	233	0	0	0	0	0	0	0	0	0	0	0	0	0	0	0	0	0	0	0	0									233	0	0	0	0	0	0	0	0	0	0	0	0	0	0	0	0	0	0	0
	234	0	0	0	0	0	0	0	0	0	0	0	0	0	0	0	0	0	0	0	0									234	0	0	0	0	0	0	0	0	0	0	0	0	0	0	0	0	0	0	0
	235	0	0	0	0	0	0	0	0	0	0	0	0	0	0	0	0	0	0	0	0									235	0	0	0	0	0	0	0	0	0	0	0	0	0	0	0	0	0	0	0
	236	0	0	0	0	0	0	0	0	0	0	0	0	0	0	0	0	0	0	0	0									236	0	0	0	0	0	0	0	0	0	0	0	0	0	0	0	0	0	0	0
	237	0	0	0	0	0	0	0	0	0	0	0	0	0	0	0	0	0	0	0	0									237	0	0	0	0	0	0	0	0	0	0	0	0	0	0	0	0	0	0	0
	238	0	0	0	0	0	0	0	0	0	0	0	0	0	0	0	0	0	0	0	0									238	0	0	0	0	0	0	0	0	0	0	0	0	0	0	0	0	0	0	0
	239	0	0	0	0	0	0	0	0	0	0	0	0	0	0	0	0	0	0	0	0									239	0	0	0	0	0	0	0	0	0	0	0	0	0	0	0	0	0	0	0
	240	0	0	0	0	0	0	0	0	0	0	0	0	0	0	0	0	0	0	0	0									240	0	0	0	0	0	0	0	0	0	0	0	0	0	0	0	0	0	0	0
	241	0	0	0	0	0	0	0	0	0	0	0	0	0	0	0	0	0	0	0	0									241	0	0	0	0	0	0	0	0	0	0	0	0	0	0	0	0	0	0	0
	242	0	0	0	0	0	0	0	0	0	0	0	0	0	0	0	0	0	0	0	0									242	0	0	0	0	0	0	0	0	0	0	0	0	0	0	0	0	0	0	0
	243	0	0	0	0	0	0	0	0	0	0	0	0	0	0	0	0	0	0	0	0									243	0	0	0	0	0	0	0	0	0	0	0	0	0	0	0	0	0	0	0
	244	0	0	0	0	0	0	0	0	0	0	0	0	0	0	0	0	0	0	0	0									244	0	0	0	0	0	0	0	0	0	0	0	0	0	0	0	0	0	0	0
	245	0	0	0	0	0	0	0	0	0	0	0	0	0	0	0	0	0	0	0	0									245	0	0	0	0	0	0	0	0	0	0	0	0	0	0	0	0	0	0	0
	246	0	0	0	0	0	0	0	0	0	0	0	0	0	0	0	0	0	0	0	0									246	0	0	0	0	0	0	0	0	0	0	0	0	0	0	0	0	0	0	0
	247	0	0	0	0	0	0	0	0	0	0	0	0	0	0	0	0	0	0	0	0									247	0	0	0	0	0	0	0	0	0	0	0	0	0	0	0	0	0	0	0
	248	0	0	0	0	0	0	0	0	0	0	0	0	0	0	0	0	0	0	0	0									248	0	0	0	0	0	0	0	0	0	0	0	0	0	0	0	0	0	0	0
	249	0	0	0	0	0	0	0	0	0	0	0	0	0	0	0	0	0	0	0	0									249	0	0	0	0	0	0	0	0	0	0	0	0	0	0	0	0	0	0	0
	250	0	0	0	0	0	0	0	0	0	0	0	0	0	0	0	0	0	0	0	0									250	0	0	0	0	0	0	0	0	0	0	0	0	0	0	0	0	0	0	0
	251	0	0	0	0	0	0	0	0	0	0	0	0	0	0	0	0	0	0	0	0									251	0	0	0	0	0	0	0	0	0	0	0	0	0	0	0	0	0	0	0
	252	0	0	0	0	0	0	0	0	0	0	0	0	0	0	0	0	0	0	0	0									252	0	0	0	0	0	0	0	0	0	0	0	0	0	0	0	0	0	0	0
	253	0	0	0	0	0	0	0	0	0	0	0	0	0	0	0	0	0	0	0	0									253	0	0	0	0	0	0	0	0	0	0	0	0	0	0	0	0	0	0	0
	254	0	0	0	0	0	0	0	0	0	0	0	0	0	0	0	0	0	0	0	0									254	0	0	0	0	0	0	0	0	0	0	0	0	0	0	0	0	0	0	0
	255	0	0	0	0	0	0	0	0	0	0	0	0	0	0	0	0	0	0	0	0									255	0	0	0	0	0	0	0	0	0	0	0	0	0	0	0	0	0	0	0
	256	0	0	0	0	0	0	0	0	0	0	0	0	0	0	0	0	0	0	0	0									256	0	0	0	0	0	0	0	0	0	0	0	0	0	0	0	0	0	0	0
	257	0	0	0	0	0	0	0	0	0	0	0	0	0	0	0	0	0	0	0	0									257	0	0	0	0	0	0	0	0	0	0	0	0	0	0	0	0	0	0	0
	258	0	0	0	0	0	0	0	0	0	0	0	0	0	0	0	0	0	0	0	0									258	0	0	0	0	0	0	0	0	0	0	0	0	0	0	0	0	0	0	0
	259	0	0	0	0	0	0	0	0	0	0	0	0	0	0	0	0	0	0	0	0									259	0	0	0	0	0	0	0	0	0	0	0	0	0	0	0	0	0	0	0
	260	0	0	0	0	0	0	0	0	0	0	0	0	0	0	0	0	0	0	0	0									260	0	0	0	0	0	0	0	0	0	0	0	0	0	0	0	0	0	0	0
	261	0	0	0	0	0	0	0	0	0	0	0	0	0	0	0	0	0	0	0	0									261	0	0	0	0	0	0	0	0	0	0	0	0	0	0	0	0	0	0	0
	262	0	0	0	0	0	0	0	0	0	0	0	0	0	0	0	0	0	0	0	0									262	0	0	0	0	0	0	0	0	0	0	0	0	0	0	0	0	0	0	0
	263	0	0	0	0	0	0	0	0	0	0	0	0	0	0	0	0	0	0	0	0									263	0	0	0	0	0	0	0	0	0	0	0	0	0	0	0	0	0	0	0
	264	0	0	0	0	0	0	0	0	0	0	0	0	0	0	0	0	0	0	0	0									264	0	0	0	0	0	0	0	0	0	0	0	0	0	0	0	0	0	0	0
	265	0	0	0	0	0	0	0	0	0	0	0	0	0	0	0	0	0	0	0	0									265	0	0	0	0	0	0	0	0	0	0	0	0	0	0	0	0	0	0	0
	266	0	0	0	0	0	0	0	0	0	0	0	0	0	0	0	0	0	0	0	0									266	0	0	0	0	0	0	0	0	0	0	0	0	0	0	0	0	0	0	0
	267	0	0	0	0	0	0	0	0	0	0	0	0	0	0	0	0	0	0	0	0									267	0	0	0	0	0	0	0	0	0	0	0	0	0	0	0	0	0	0	0
	268	0	0	0	0	0	0	0	0	0	0	0	0	0	0	0	0	0	0	0	0									268	0	0	0	0	0	0	0	0	0	0	0	0	0	0	0	0	0	0	0
	269	0	0	0	0	0	0	0	0	0	0	0	0	0	0	0	0	0	0	0	0									269	0	0	0	0	0	0	0	0	0	0	0	0	0	0	0	0	0	0	0
	270	0	0	0	0	0	0	0	0	0	0	0	0	0	0	0	0	0	0	0	0									270	0	0	0	0	0	0	0	0	0	0	0	0	0	0	0	0	0	0	0
	271	0	0	0	0	0	0	0	0	0	0	0	0	0	0	0	0	0	0	0	0									271	0	0	0	0	0	0	0	0	0	0	0	0	0	0	0	0	0	0	0
	272	0	0	0	0	0	0	0	0	0	0	0	0	0	0	0	0	0	0	0	0									272	0	0	0	0	0	0	0	0	0	0	0	0	0	0	0	0	0	0	0
	273	0	0	0	0	0	0	0	0	0	0	0	0	0	0	0	0	0	0	0	0									273	0	0	0	0	0	0	0	0	0	0	0	0	0	0	0	0	0	0	0
	274	0	0	0	0	0	0	0	0	0	0	0	0	0	0	0	0	0	0	0	0									274	0	0	0	0	0	0	0	0	0	0	0	0	0	0	0	0	0	0	0
	275	0	0	0	0	0	0	0	0	0	0	0	0	0	0	0	0	0	0	0	0									275	0	0	0	0	0	0	0	0	0	0	0	0	0	0	0	0	0	0	0
	276	0	0	0	0	0	0	0	0	0	0	0	0	0	0	0	0	0	0	0	0									276	0	0	0	0	0	0	0	0	0	0	0	0	0	0	0	0	0	0	0
	277	0	0	0	0	0	0	0	0	0	0	0	0	0	0	0	0	0	0	0	0									277	0	0	0	0	0	0	0	0	0	0	0	0	0	0	0	0	0	0	0
	278	0	0	0	0	0	0	0	0	0	0	0	0	0	0	0	0	0	0	0	0									278	0	0	0	0	0	0	0	0	0	0	0	0	0	0	0	0	0	0	0
	279	0	0	0	0	0	0	0	0	0	0	0	0	0	0	0	0	0	0	0	0									279	0	0	0	0	0	0	0	0	0	0	0	0	0	0	0	0	0	0	0
	280	0	0	0	0	0	0	0	0	0	0	0	0	0	0	0	0	0	0	0	0									280	0	0	0	0	0	0	0	0	0	0	0	0	0	0	0	0	0	0	0
	281	0	0	0	0	0	0	0	0	0	0	0	0	0	0	0	0	0	0	0	0									281	0	0	0	0	0	0	0	0	0	0	0	0	0	0	0	0	0	0	0
	282	0	0	0	0	0	0	0	0	0	0	0	0	0	0	0	0	0	0	0	0									282	0	0	0	0	0	0	0	0	0	0	0	0	0	0	0	0	0	0	0
	283	0	0	0	0	0	0	0	0	0	0	0	0	0	0	0	0	0	0	0	0									283	0	0	0	0	0	0	0	0	0	0	0	0	0	0	0	0	0	0	0
	284	0	0	0	0	0	0	0	0	0	0	0	0	0	0	0	0	0	0	0	0									284	0	0	0	0	0	0	0	0	0	0	0	0	0	0	0	0	0	0	0
	285	0	0	0	0	0	0	0	0	0	0	0	0	0	0	0	0	0	0	0	0									285	0	0	0	0	0	0	0	0	0	0	0	0	0	0	0	0	0	0	0
	286	0	0	0	0	0	0	0	0	0	0	0	0	0	0	0	0	0	0	0	0									286	0	0	0	0	0	0	0	0	0	0	0	0	0	0	0	0	0	0	0
	287	0	0	0	0	0	0	0	0	0	0	0	0	0	0	0	0	0	0	0	0									287	0	0	0	0	0	0	0	0	0	0	0	0	0	0	0	0	0	0	0
	288	0	0	0	0	0	0	0	0	0	0	0	0	0	0	0	0	0	0	0	0									288	0	0	0	0	0	0	0	0	0	0	0	0	0	0	0	0	0	0	0
	289	0	0	0	0	0	0	0	0	0	0	0	0	0	0	0	0	0	0	0	0									289	0	0	0	0	0	0	0	0	0	0	0	0	0	0	0	0	0	0	0
	290	0	0	0	0	0	0	0	0	0	0	0	0	0	0	0	0	0	0	0	0									290	0	0	0	0	0	0	0	0	0	0	0	0	0	0	0	0	0	0	0
	291	0	0	0	0	0	0	0	0	0	0	0	0	0	0	0	0	0	0	0	0									291	0	0	0	0	0	0	0	0	0	0	0	0	0	0	0	0	0	0	0
	292	0	0	0	0	0	0	0	0	0	0	0	0	0	0	0	0	0	0	0	0									292	0	0	0	0	0	0	0	0	0	0	0	0	0	0	0	0	0	0	0
	293	0	0	0	0	0	0	0	0	0	0	0	0	0	0	0	0	0	0	0	0									293	0	0	0	0	0	0	0	0	0	0	0	0	0	0	0	0	0	0	0
	294	0	0	0	0	0	0	0	0	0	0	0	0	0	0	0	0	0	0	0	0									294	0	0	0	0	0	0	0	0	0	0	0	0	0	0	0	0	0	0	0
	295	0	0	0	0	0	0	0	0	0	0	0	0	0	0	0	0	0	0	0	0									295	0	0	0	0	0	0	0	0	0	0	0	0	0	0	0	0	0	0	0
	296	0	0	0	0	0	0	0	0	0	0	0	0	0	0	0	0	0	0	0	0									296	0	0	0	0	0	0	0	0	0	0	0	0	0	0	0	0	0	0	0
	297	0	0	0	0	0	0	0	0	0	0	0	0	0	0	0	0	0	0	0	0									297	0	0	0	0	0	0	0	0	0	0	0	0	0	0	0	0	0	0	0
	298	0	0	0	0	0	0	0	0	0	0	0	0	0	0	0	0	0	0	0	0									298	0	0	0	0	0	0	0	0	0	0	0	0	0	0	0	0	0	0	0
	299	0	0	0	0	0	0	0	0	0	0	0	0	0	0	0	0	0	0	0	0									299	0	0	0	0	0	0	0	0	0	0	0	0	0	0	0	0	0	0	0
	300	0	0	0	0	0	0	0	0	0	0	0	0	0	0	0	0	0	0	0	0									300	0	0	0	0	0	0	0	0	0	0	0	0	0	0	0	0	0	0	0
	301	0	0	0	0	0	0	0	0	0	0	0	0	0	0	0	0	0	0	0	0									301	0	0	0	0	0	0	0	0	0	0	0	0	0	0	0	0	0	0	0
	302	0	0	0	0	0	0	0	0	0	0	0	0	0	0	0	0	0	0	0	0									302	0	0	0	0	0	0	0	0	0	0	0	0	0	0	0	0	0	0	0
	303	0	0	0	0	0	0	0	0	0	0	0	0	0	0	0	0	0	0	0	0									303	0	0	0	0	0	0	0	0	0	0	0	0	0	0	0	0	0	0	0
	304	0	0	0	0	0	0	0	0	0	0	0	0	0	0	0	0	0	0	0	0									304	0	0	0	0	0	0	0	0	0	0	0	0	0	0	0	0	0	0	0
	305	0	0	0	0	0	0	0	0	0	0	0	0	0	0	0	0	0	0	0	0									305	0	0	0	0	0	0	0	0	0	0	0	0	0	0	0	0	0	0	0
	306	0	0	0	0	0	0	0	0	0	0	0	0	0	0	0	0	0	0	0	0									306	0	0	0	0	0	0	0	0	0	0	0	0	0	0	0	0	0	0	0
	307	0	0	0	0	0	0	0	0	0	0	0	0	0	0	0	0	0	0	0	0									307	0	0	0	0	0	0	0	0	0	0	0	0	0	0	0	0	0	0	0
	308	0	0	0	0	0	0	0	0	0	0	0	0	0	0	0	0	0	0	0	0									308	0	0	0	0	0	0	0	0	0	0	0	0	0	0	0	0	0	0	0
	309	0	0	0	0	0	0	0	0	0	0	0	0	0	0	0	0	0	0	0	0									309	0	0	0	0	0	0	0	0	0	0	0	0	0	0	0	0	0	0	0
	310	0	0	0	0	0	0	0	0	0	0	0	0	0	0	0	0	0	0	0	0									310	0	0	0	0	0	0	0	0	0	0	0	0	0	0	0	0	0	0	0
	311	0	0	0	0	0	0	0	0	0	0	0	0	0	0	0	0	0	0	0	0									311	0	0	0	0	0	0	0	0	0	0	0	0	0	0	0	0	0	0	0
	312	0	0	0	0	0	0	0	0	0	0	0	0	0	0	0	0	0	0	0	0									312	0	0	0	0	0	0	0	0	0	0	0	0	0	0	0	0	0	0	0
	313	0	0	0	0	0	0	0	0	0	0	0	0	0	0	0	0	0	0	0	0									313	0	0	0	0	0	0	0	0	0	0	0	0	0	0	0	0	0	0	0
	314	0	0	0	0	0	0	0	0	0	0	0	0	0	0	0	0	0	0	0	0									314	0	0	0	0	0	0	0	0	0	0	0	0	0	0	0	0	0	0	0
	315	0	0	0	0	0	0	0	0	0	0	0	0	0	0	0	0	0	0	0	0									315	0	0	0	0	0	0	0	0	0	0	0	0	0	0	0	0	0	0	0
	316	0	0	0	0	0	0	0	0	0	0	0	0	0	0	0	0	0	0	0	0									316	0	0	0	0	0	0	0	0	0	0	0	0	0	0	0	0	0	0	0
	317	0	0	0	0	0	0	0	0	0	0	0	0	0	0	0	0	0	0	0	0									317	0	0	0	0	0	0	0	0	0	0	0	0	0	0	0	0	0	0	0
	318	0	0	0	0	0	0	0	0	0	0	0	0	0	0	0	0	0	0	0	0									318	0	0	0	0	0	0	0	0	0	0	0	0	0	0	0	0	0	0	0
	319	0	0	0	0	0	0	0	0	0	0	0	0	0	0	0	0	0	0	0	0									319	0	0	0	0	0	0	0	0	0	0	0	0	0	0	0	0	0	0	0
	320	0	0	0	0	0	0	0	0	0	0	0	0	0	0	0	0	0	0	0	0									320	0	0	0	0	0	0	0	0	0	0	0	0	0	0	0	0	0	0	0
	321	0	0	0	0	0	0	0	0	0	0	0	0	0	0	0	0	0	0	0	0									321	0	0	0	0	0	0	0	0	0	0	0	0	0	0	0	0	0	0	0
	322	0	0	0	0	0	0	0	0	0	0	0	0	0	0	0	0	0	0	0	0									322	0	0	0	0	0	0	0	0	0	0	0	0	0	0	0	0	0	0	0
	323	0	0	0	0	0	0	0	0	0	0	0	0	0	0	0	0	0	0	0	0									323	0	0	0	0	0	0	0	0	0	0	0	0	0	0	0	0	0	0	0
	324	0	0	0	0	0	0	0	0	0	0	0	0	0	0	0	0	0	0	0	0									324	0	0	0	0	0	0	0	0	0	0	0	0	0	0	0	0	0	0	0
	325	0	0	0	0	0	0	0	0	0	0	0	0	0	0	0	0	0	0	0	0									325	0	0	0	0	0	0	0	0	0	0	0	0	0	0	0	0	0	0	0
	326	0	0	0	0	0	0	0	0	0	0	0	0	0	0	0	0	0	0	0	0									326	0	0	0	0	0	0	0	0	0	0	0	0	0	0	0	0	0	0	0
	327	0	0	0	0	0	0	0	0	0	0	0	0	0	0	0	0	0	0	0	0									327	0	0	0	0	0	0	0	0	0	0	0	0	0	0	0	0	0	0	0
	328	0	0	0	0	0	0	0	0	0	0	0	0	0	0	0	0	0	0	0	0									328	0	0	0	0	0	0	0	0	0	0	0	0	0	0	0	0	0	0	0
	329	0	0	0	0	0	0	0	0	0	0	0	0	0	0	0	0	0	0	0	0									329	0	0	0	0	0	0	0	0	0	0	0	0	0	0	0	0	0	0	0
	330	0	0	0	0	0	0	0	0	0	0	0	0	0	0	0	0	0	0	0	0									330	0	0	0	0	0	0	0	0	0	0	0	0	0	0	0	0	0	0	0
	331	0	0	0	0	0	0	0	0	0	0	0	0	0	0	0	0	0	0	0	0									331	0	0	0	0	0	0	0	0	0	0	0	0	0	0	0	0	0	0	0
	332	0	0	0	0	0	0	0	0	0	0	0	0	0	0	0	0	0	0	0	0									332	0	0	0	0	0	0	0	0	0	0	0	0	0	0	0	0	0	0	0
	333	0	0	0	0	0	0	0	0	0	0	0	0	0	0	0	0	0	0	0	0									333	0	0	0	0	0	0	0	0	0	0	0	0	0	0	0	0	0	0	0
	334	0	0	0	0	0	0	0	0	0	0	0	0	0	0	0	0	0	0	0	0									334	0	0	0	0	0	0	0	0	0	0	0	0	0	0	0	0	0	0	0
	335	0	0	0	0	0	0	0	0	0	0	0	0	0	0	0	0	0	0	0	0									335	0	0	0	0	0	0	0	0	0	0	0	0	0	0	0	0	0	0	0
	336	0	0	0	0	0	0	0	0	0	0	0	0	0	0	0	0	0	0	0	0									336	0	0	0	0	0	0	0	0	0	0	0	0	0	0	0	0	0	0	0
	337	0	0	0	0	0	0	0	0	0	0	0	0	0	0	0	0	0	0	0	0									337	0	0	0	0	0	0	0	0	0	0	0	0	0	0	0	0	0	0	0
	338	0	0	0	0	0	0	0	0	0	0	0	0	0	0	0	0	0	0	0	0									338	0	0	0	0	0	0	0	0	0	0	0	0	0	0	0	0	0	0	0
	339	0	0	0	0	0	0	0	0	0	0	0	0	0	0	0	0	0	0	0	0									339	0	0	0	0	0	0	0	0	0	0	0	0	0	0	0	0	0	0	0
	340	0	0	0	0	0	0	0	0	0	0	0	0	0	0	0	0	0	0	0	0									340	0	0	0	0	0	0	0	0	0	0	0	0	0	0	0	0	0	0	0
	341	0	0	0	0	0	0	0	0	0	0	0	0	0	0	0	0	0	0	0	0									341	0	0	0	0	0	0	0	0	0	0	0	0	0	0	0	0	0	0	0
	342	0	0	0	0	0	0	0	0	0	0	0	0	0	0	0	0	0	0	0	0									342	0	0	0	0	0	0	0	0	0	0	0	0	0	0	0	0	0	0	0
	343	0	0	0	0	0	0	0	0	0	0	0	0	0	0	0	0	0	0	0	0									343	0	0	0	0	0	0	0	0	0	0	0	0	0	0	0	0	0	0	0
	344	0	0	0	0	0	0	0	0	0	0	0	0	0	0	0	0	0	0	0	0									344	0	0	0	0	0	0	0	0	0	0	0	0	0	0	0	0	0	0	0
	345	0	0	0	0	0	0	0	0	0	0	0	0	0	0	0	0	0	0	0	0									345	0	0	0	0	0	0	0	0	0	0	0	0	0	0	0	0	0	0	0
	346	0	0	0	0	0	0	0	0	0	0	0	0	0	0	0	0	0	0	0	0									346	0	0	0	0	0	0	0	0	0	0	0	0	0	0	0	0	0	0	0
	347	0	0	0	0	0	0	0	0	0	0	0	0	0	0	0	0	0	0	0	0									347	0	0	0	0	0	0	0	0	0	0	0	0	0	0	0	0	0	0	0
	348	0	0	0	0	0	0	0	0	0	0	0	0	0	0	0	0	0	0	0	0									348	0	0	0	0	0	0	0	0	0	0	0	0	0	0	0	0	0	0	0
	349	0	0	0	0	0	0	0	0	0	0	0	0	0	0	0	0	0	0	0	0									349	0	0	0	0	0	0	0	0	0	0	0	0	0	0	0	0	0	0	0
	350	0	0	0	0	0	0	0	0	0	0	0	0	0	0	0	0	0	0	0	0									350	0	0	0	0	0	0	0	0	0	0	0	0	0	0	0	0	0	0	0
	351	0	0	0	0	0	0	0	0	0	0	0	0	0	0	0	0	0	0	0	0									351	0	0	0	0	0	0	0	0	0	0	0	0	0	0	0	0	0	0	0
	352	0	0	0	0	0	0	0	0	0	0	0	0	0	0	0	0	0	0	0	0									352	0	0	0	0	0	0	0	0	0	0	0	0	0	0	0	0	0	0	0
	353	0	0	0	0	0	0	0	0	0	0	0	0	0	0	0	0	0	0	0	0									353	0	0	0	0	0	0	0	0	0	0	0	0	0	0	0	0	0	0	0
	354	0	0	0	0	0	0	0	0	0	0	0	0	0	0	0	0	0	0	0	0									354	0	0	0	0	0	0	0	0	0	0	0	0	0	0	0	0	0	0	0
	355	0	0	0	0	0	0	0	0	0	0	0	0	0	0	0	0	0	0	0	0									355	0	0	0	0	0	0	0	0	0	0	0	0	0	0	0	0	0	0	0
	356	0	0	0	0	0	0	0	0	0	0	0	0	0	0	0	0	0	0	0	0									356	0	0	0	0	0	0	0	0	0	0	0	0	0	0	0	0	0	0	0
	357	0	0	0	0	0	0	0	0	0	0	0	0	0	0	0	0	0	0	0	0									357	0	0	0	0	0	0	0	0	0	0	0	0	0	0	0	0	0	0	0
	358	0	0	0	0	0	0	0	0	0	0	0	0	0	0	0	0	0	0	0	0									358	0	0	0	0	0	0	0	0	0	0	0	0	0	0	0	0	0	0	0
	359	0	0	0	0	0	0	0	0	0	0	0	0	0	0	0	0	0	0	0	0									359	0	0	0	0	0	0	0	0	0	0	0	0	0	0	0	0	0	0	0
	360	0	0	0	0	0	0	0	0	0	0	0	0	0	0	0	0	0	0	0	0									360	0	0	0	0	0	0	0	0	0	0	0	0	0	0	0	0	0	0	0
	361	0	0	0	0	0	0	0	0	0	0	0	0	0	0	0	0	0	0	0	0									361	0	0	0	0	0	0	0	0	0	0	0	0	0	0	0	0	0	0	0
	362	0	0	0	0	0	0	0	0	0	0	0	0	0	0	0	0	0	0	0	0									362	0	0	0	0	0	0	0	0	0	0	0	0	0	0	0	0	0	0	0
	363	0	0	0	0	0	0	0	0	0	0	0	0	0	0	0	0	0	0	0	0									363	0	0	0	0	0	0	0	0	0	0	0	0	0	0	0	0	0	0	0
	364	0	0	0	0	0	0	0	0	0	0	0	0	0	0	0	0	0	0	0	0									364	0	0	0	0	0	0	0	0	0	0	0	0	0	0	0	0	0	0	0
	365	0	0	0	0	0	0	0	0	0	0	0	0	0	0	0	0	0	0	0	0									365	0	0	0	0	0	0	0	0	0	0	0	0	0	0	0	0	0	0	0
	366	0	0	0	0	0	0	0	0	0	0	0	0	0	0	0	0	0	0	0	0									366	0	0	0	0	0	0	0	0	0	0	0	0	0	0	0	0	0	0	0
	367	0	0	0	0	0	0	0	0	0	0	0	0	0	0	0	0	0	0	0	0									367	0	0	0	0	0	0	0	0	0	0	0	0	0	0	0	0	0	0	0
	368	0	0	0	0	0	0	0	0	0	0	0	0	0	0	0	0	0	0	0	0									368	0	0	0	0	0	0	0	0	0	0	0	0	0	0	0	0	0	0	0
	369	0	0	0	0	0	0	0	0	0	0	0	0	0	0	0	0	0	0	0	0									369	0	0	0	0	0	0	0	0	0	0	0	0	0	0	0	0	0	0	0
	370	0	0	0	0	0	0	0	0	0	0	0	0	0	0	0	0	0	0	0	0									370	0	0	0	0	0	0	0	0	0	0	0	0	0	0	0	0	0	0	0
	371	0	0	0	0	0	0	0	0	0	0	0	0	0	0	0	0	0	0	0	0									371	0	0	0	0	0	0	0	0	0	0	0	0	0	0	0	0	0	0	0
	372	0	0	0	0	0	0	0	0	0	0	0	0	0	0	0	0	0	0	0	0									372	0	0	0	0	0	0	0	0	0	0	0	0	0	0	0	0	0	0	0
	373	0	0	0	0	0	0	0	0	0	0	0	0	0	0	0	0	0	0	0	0									373	0	0	0	0	0	0	0	0	0	0	0	0	0	0	0	0	0	0	0
	374	0	0	0	0	0	0	0	0	0	0	0	0	0	0	0	0	0	0	0	0									374	0	0	0	0	0	0	0	0	0	0	0	0	0	0	0	0	0	0	0
	375	0	0	0	0	0	0	0	0	0	0	0	0	0	0	0	0	0	0	0	0									375	0	0	0	0	0	0	0	0	0	0	0	0	0	0	0	0	0	0	0
	376	0	0	0	0	0	0	0	0	0	0	0	0	0	0	0	0	0	0	0	0									376	0	0	0	0	0	0	0	0	0	0	0	0	0	0	0	0	0	0	0
	377	0	0	0	0	0	0	0	0	0	0	0	0	0	0	0	0	0	0	0	0									377	0	0	0	0	0	0	0	0	0	0	0	0	0	0	0	0	0	0	0
	378	0	0	0	0	0	0	0	0	0	0	0	0	0	0	0	0	0	0	0	0									378	0	0	0	0	0	0	0	0	0	0	0	0	0	0	0	0	0	0	0
	379	0	0	0	0	0	0	0	0	0	0	0	0	0	0	0	0	0	0	0	0									379	0	0	0	0	0	0	0	0	0	0	0	0	0	0	0	0	0	0	0
	380	0	0	0	0	0	0	0	0	0	0	0	0	0	0	0	0	0	0	0	0									380	0	0	0	0	0	0	0	0	0	0	0	0	0	0	0	0	0	0	0
	381	0	0	0	0	0	0	0	0	0	0	0	0	0	0	0	0	0	0	0	0									381	0	0	0	0	0	0	0	0	0	0	0	0	0	0	0	0	0	0	0
	382	0	0	0	0	0	0	0	0	0	0	0	0	0	0	0	0	0	0	0	0									382	0	0	0	0	0	0	0	0	0	0	0	0	0	0	0	0	0	0	0
	383	0	0	0	0	0	0	0	0	0	0	0	0	0	0	0	0	0	0	0	0									383	0	0	0	0	0	0	0	0	0	0	0	0	0	0	0	0	0	0	0
	384	0	0	0	0	0	0	0	0	0	0	0	0	0	0	0	0	0	0	0	0									384	0	0	0	0	0	0	0	0	0	0	0	0	0	0	0	0	0	0	0
	385	0	0	0	0	0	0	0	0	0	0	0	0	0	0	0	0	0	0	0	0									385	0	0	0	0	0	0	0	0	0	0	0	0	0	0	0	0	0	0	0
	386	0	0	0	0	0	0	0	0	0	0	0	0	0	0	0	0	0	0	0	0									386	0	0	0	0	0	0	0	0	0	0	0	0	0	0	0	0	0	0	0
	387	0	0	0	0	0	0	0	0	0	0	0	0	0	0	0	0	0	0	0	0									387	0	0	0	0	0	0	0	0	0	0	0	0	0	0	0	0	0	0	0
	388	0	0	0	0	0	0	0	0	0	0	0	0	0	0	0	0	0	0	0	0									388	0	0	0	0	0	0	0	0	0	0	0	0	0	0	0	0	0	0	0
	389	0	0	0	0	0	0	0	0	0	0	0	0	0	0	0	0	0	0	0	0									389	0	0	0	0	0	0	0	0	0	0	0	0	0	0	0	0	0	0	0
	390	0	0	0	0	0	0	0	0	0	0	0	0	0	0	0	0	0	0	0	0									390	0	0	0	0	0	0	0	0	0	0	0	0	0	0	0	0	0	0	0
	391	0	0	0	0	0	0	0	0	0	0	0	0	0	0	0	0	0	0	0	0									391	0	0	0	0	0	0	0	0	0	0	0	0	0	0	0	0	0	0	0
	392	0	0	0	0	0	0	0	0	0	0	0	0	0	0	0	0	0	0	0	0									392	0	0	0	0	0	0	0	0	0	0	0	0	0	0	0	0	0	0	0
	393	0	0	0	0	0	0	0	0	0	0	0	0	0	0	0	0	0	0	0	0									393	0	0	0	0	0	0	0	0	0	0	0	0	0	0	0	0	0	0	0
	394	0	0	0	0	0	0	0	0	0	0	0	0	0	0	0	0	0	0	0	0									394	0	0	0	0	0	0	0	0	0	0	0	0	0	0	0	0	0	0	0
	395	0	0	0	0	0	0	0	0	0	0	0	0	0	0	0	0	0	0	0	0									395	0	0	0	0	0	0	0	0	0	0	0	0	0	0	0	0	0	0	0
	396	0	0	0	0	0	0	0	0	0	0	0	0	0	0	0	0	0	0	0	0									396	0	0	0	0	0	0	0	0	0	0	0	0	0	0	0	0	0	0	0
	397	0	0	0	0	0	0	0	0	0	0	0	0	0	0	0	0	0	0	0	0									397	0	0	0	0	0	0	0	0	0	0	0	0	0	0	0	0	0	0	0
	398	0	0	0	0	0	0	0	0	0	0	0	0	0	0	0	0	0	0	0	0									398	0	0	0	0	0	0	0	0	0	0	0	0	0	0	0	0	0	0	0
	399	0	0	0	0	0	0	0	0	0	0	0	0	0	0	0	0	0	0	0	0									399	0	0	0	0	0	0	0	0	0	0	0	0	0	0	0	0	0	0	0
	400	0	0	0	0	0	0	0	0	0	0	0	0	0	0	0	0	0	0	0	0									400	0	0	0	0	0	0	0	0	0	0	0	0	0	0	0	0	0	0	0
	401	0	0	0	0	0	0	0	0	0	0	0	0	0	0	0	0	0	0	0	0									401	0	0	0	0	0	0	0	0	0	0	0	0	0	0	0	0	0	0	0
	402	0	0	0	0	0	0	0	0	0	0	0	0	0	0	0	0	0	0	0	0									402	0	0	0	0	0	0	0	0	0	0	0	0	0	0	0	0	0	0	0
	403	0	0	0	0	0	0	0	0	0	0	0	0	0	0	0	0	0	0	0	0									403	0	0	0	0	0	0	0	0	0	0	0	0	0	0	0	0	0	0	0
	404	0	0	0	0	0	0	0	0	0	0	0	0	0	0	0	0	0	0	0	0									404	0	0	0	0	0	0	0	0	0	0	0	0	0	0	0	0	0	0	0
	405	0	0	0	0	0	0	0	0	0	0	0	0	0	0	0	0	0	0	0	0									405	0	0	0	0	0	0	0	0	0	0	0	0	0	0	0	0	0	0	0
	406	0	0	0	0	0	0	0	0	0	0	0	0	0	0	0	0	0	0	0	0									406	0	0	0	0	0	0	0	0	0	0	0	0	0	0	0	0	0	0	0
	407	0	0	0	0	0	0	0	0	0	0	0	0	0	0	0	0	0	0	0	0									407	0	0	0	0	0	0	0	0	0	0	0	0	0	0	0	0	0	0	0
	408	0	0	0	0	0	0	0	0	0	0	0	0	0	0	0	0	0	0	0	0									408	0	0	0	0	0	0	0	0	0	0	0	0	0	0	0	0	0	0	0
	409	0	0	0	0	0	0	0	0	0	0	0	0	0	0	0	0	0	0	0	0									409	0	0	0	0	0	0	0	0	0	0	0	0	0	0	0	0	0	0	0
	410	0	0	0	0	0	0	0	0	0	0	0	0	0	0	0	0	0	0	0	0									410	0	0	0	0	0	0	0	0	0	0	0	0	0	0	0	0	0	0	0
	411	0	0	0	0	0	0	0	0	0	0	0	0	0	0	0	0	0	0	0	0									411	0	0	0	0	0	0	0	0	0	0	0	0	0	0	0	0	0	0	0
	412	0	0	0	0	0	0	0	0	0	0	0	0	0	0	0	0	0	0	0	0									412	0	0	0	0	0	0	0	0	0	0	0	0	0	0	0	0	0	0	0
	413	0	0	0	0	0	0	0	0	0	0	0	0	0	0	0	0	0	0	0	0									413	0	0	0	0	0	0	0	0	0	0	0	0	0	0	0	0	0	0	0
	414	0	0	0	0	0	0	0	0	0	0	0	0	0	0	0	0	0	0	0	0									414	0	0	0	0	0	0	0	0	0	0	0	0	0	0	0	0	0	0	0
	415	0	0	0	0	0	0	0	0	0	0	0	0	0	0	0	0	0	0	0	0									415	0	0	0	0	0	0	0	0	0	0	0	0	0	0	0	0	0	0	0
	416	0	0	0	0	0	0	0	0	0	0	0	0	0	0	0	0	0	0	0	0									416	0	0	0	0	0	0	0	0	0	0	0	0	0	0	0	0	0	0	0
	417	0	0	0	0	0	0	0	0	0	0	0	0	0	0	0	0	0	0	0	0									417	0	0	0	0	0	0	0	0	0	0	0	0	0	0	0	0	0	0	0
	418	0	0	0	0	0	0	0	0	0	0	0	0	0	0	0	0	0	0	0	0									418	0	0	0	0	0	0	0	0	0	0	0	0	0	0	0	0	0	0	0
	419	0	0	0	0	0	0	0	0	0	0	0	0	0	0	0	0	0	0	0	0									419	0	0	0	0	0	0	0	0	0	0	0	0	0	0	0	0	0	0	0
	420	0	0	0	0	0	0	0	0	0	0	0	0	0	0	0	0	0	0	0	0									420	0	0	0	0	0	0	0	0	0	0	0	0	0	0	0	0	0	0	0
	421	0	0	0	0	0	0	0	0	0	0	0	0	0	0	0	0	0	0	0	0									421	0	0	0	0	0	0	0	0	0	0	0	0	0	0	0	0	0	0	0
	422	0	0	0	0	0	0	0	0	0	0	0	0	0	0	0	0	0	0	0	0									422	0	0	0	0	0	0	0	0	0	0	0	0	0	0	0	0	0	0	0
	423	0	0	0	0	0	0	0	0	0	0	0	0	0	0	0	0	0	0	0	0									423	0	0	0	0	0	0	0	0	0	0	0	0	0	0	0	0	0	0	0
	424	0	0	0	0	0	0	0	0	0	0	0	0	0	0	0	0	0	0	0	0									424	0	0	0	0	0	0	0	0	0	0	0	0	0	0	0	0	0	0	0
	425	0	0	0	0	0	0	0	0	0	0	0	0	0	0	0	0	0	0	0	0									425	0	0	0	0	0	0	0	0	0	0	0	0	0	0	0	0	0	0	0
	426	0	0	0	0	0	0	0	0	0	0	0	0	0	0	0	0	0	0	0	0									426	0	0	0	0	0	0	0	0	0	0	0	0	0	0	0	0	0	0	0
	427	0	0	0	0	0	0	0	0	0	0	0	0	0	0	0	0	0	0	0	0									427	0	0	0	0	0	0	0	0	0	0	0	0	0	0	0	0	0	0	0
	428	0	0	0	0	0	0	0	0	0	0	0	0	0	0	0	0	0	0	0	0									428	0	0	0	0	0	0	0	0	0	0	0	0	0	0	0	0	0	0	0
	429	0	0	0	0	0	0	0	0	0	0	0	0	0	0	0	0	0	0	0	0									429	0	0	0	0	0	0	0	0	0	0	0	0	0	0	0	0	0	0	0
	430	0	0	0	0	0	0	0	0	0	0	0	0	0	0	0	0	0	0	0	0									430	0	0	0	0	0	0	0	0	0	0	0	0	0	0	0	0	0	0	0
	431	0	0	0	0	0	0	0	0	0	0	0	0	0	0	0	0	0	0	0	0									431	0	0	0	0	0	0	0	0	0	0	0	0	0	0	0	0	0	0	0
	432	0	0	0	0	0	0	0	0	0	0	0	0	0	0	0	0	0	0	0	0									432	0	0	0	0	0	0	0	0	0	0	0	0	0	0	0	0	0	0	0
	433	0	0	0	0	0	0	0	0	0	0	0	0	0	0	0	0	0	0	0	0									433	0	0	0	0	0	0	0	0	0	0	0	0	0	0	0	0	0	0	0
	434	0	0	0	0	0	0	0	0	0	0	0	0	0	0	0	0	0	0	0	0									434	0	0	0	0	0	0	0	0	0	0	0	0	0	0	0	0	0	0	0
	435	0	0	0	0	0	0	0	0	0	0	0	0	0	0	0	0	0	0	0	0									435	0	0	0	0	0	0	0	0	0	0	0	0	0	0	0	0	0	0	0
	436	0	0	0	0	0	0	0	0	0	0	0	0	0	0	0	0	0	0	0	0									436	0	0	0	0	0	0	0	0	0	0	0	0	0	0	0	0	0	0	0
	437	0	0	0	0	0	0	0	0	0	0	0	0	0	0	0	0	0	0	0	0									437	0	0	0	0	0	0	0	0	0	0	0	0	0	0	0	0	0	0	0
	438	0	0	0	0	0	0	0	0	0	0	0	0	0	0	0	0	0	0	0	0									438	0	0	0	0	0	0	0	0	0	0	0	0	0	0	0	0	0	0	0
	439	0	0	0	0	0	0	0	0	0	0	0	0	0	0	0	0	0	0	0	0									439	0	0	0	0	0	0	0	0	0	0	0	0	0	0	0	0	0	0	0
	440	0	0	0	0	0	0	0	0	0	0	0	0	0	0	0	0	0	0	0	0									440	0	0	0	0	0	0	0	0	0	0	0	0	0	0	0	0	0	0	0
	441	0	0	0	0	0	0	0	0	0	0	0	0	0	0	0	0	0	0	0	0									441	0	0	0	0	0	0	0	0	0	0	0	0	0	0	0	0	0	0	0
	442	0	0	0	0	0	0	0	0	0	0	0	0	0	0	0	0	0	0	0	0									442	0	0	0	0	0	0	0	0	0	0	0	0	0	0	0	0	0	0	0
	443	0	0	0	0	0	0	0	0	0	0	0	0	0	0	0	0	0	0	0	0									443	0	0	0	0	0	0	0	0	0	0	0	0	0	0	0	0	0	0	0
	444	0	0	0	0	0	0	0	0	0	0	0	0	0	0	0	0	0	0	0	0									444	0	0	0	0	0	0	0	0	0	0	0	0	0	0	0	0	0	0	0
	445	0	0	0	0	0	0	0	0	0	0	0	0	0	0	0	0	0	0	0	0									445	0	0	0	0	0	0	0	0	0	0	0	0	0	0	0	0	0	0	0
	446	0	0	0	0	0	0	0	0	0	0	0	0	0	0	0	0	0	0	0	0									446	0	0	0	0	0	0	0	0	0	0	0	0	0	0	0	0	0	0	0
	447	0	0	0	0	0	0	0	0	0	0	0	0	0	0	0	0	0	0	0	0									447	0	0	0	0	0	0	0	0	0	0	0	0	0	0	0	0	0	0	0
	448	0	0	0	0	0	0	0	0	0	0	0	0	0	0	0	0	0	0	0	0									448	0	0	0	0	0	0	0	0	0	0	0	0	0	0	0	0	0	0	0
	449	0	0	0	0	0	0	0	0	0	0	0	0	0	0	0	0	0	0	0	0									449	0	0	0	0	0	0	0	0	0	0	0	0	0	0	0	0	0	0	0
	450	0	0	0	0	0	0	0	0	0	0	0	0	0	0	0	0	0	0	0	0									450	0	0	0	0	0	0	0	0	0	0	0	0	0	0	0	0	0	0	0
	451	0	0	0	0	0	0	0	0	0	0	0	0	0	0	0	0	0	0	0	0									451	0	0	0	0	0	0	0	0	0	0	0	0	0	0	0	0	0	0	0
	452	0	0	0	0	0	0	0	0	0	0	0	0	0	0	0	0	0	0	0	0									452	0	0	0	0	0	0	0	0	0	0	0	0	0	0	0	0	0	0	0
	453	0	0	0	0	0	0	0	0	0	0	0	0	0	0	0	0	0	0	0	0									453	0	0	0	0	0	0	0	0	0	0	0	0	0	0	0	0	0	0	0
	454	0	0	0	0	0	0	0	0	0	0	0	0	0	0	0	0	0	0	0	0									454	0	0	0	0	0	0	0	0	0	0	0	0	0	0	0	0	0	0	0
	455	0	0	0	0	0	0	0	0	0	0	0	0	0	0	0	0	0	0	0	0									455	0	0	0	0	0	0	0	0	0	0	0	0	0	0	0	0	0	0	0
	456	0	0	0	0	0	0	0	0	0	0	0	0	0	0	0	0	0	0	0	0									456	0	0	0	0	0	0	0	0	0	0	0	0	0	0	0	0	0	0	0
	457	0	0	0	0	0	0	0	0	0	0	0	0	0	0	0	0	0	0	0	0									457	0	0	0	0	0	0	0	0	0	0	0	0	0	0	0	0	0	0	0
	458	0	0	0	0	0	0	0	0	0	0	0	0	0	0	0	0	0	0	0	0									458	0	0	0	0	0	0	0	0	0	0	0	0	0	0	0	0	0	0	0
	459	0	0	0	0	0	0	0	0	0	0	0	0	0	0	0	0	0	0	0	0									459	0	0	0	0	0	0	0	0	0	0	0	0	0	0	0	0	0	0	0
	460	0	0	0	0	0	0	0	0	0	0	0	0	0	0	0	0	0	0	0	0									460	0	0	0	0	0	0	0	0	0	0	0	0	0	0	0	0	0	0	0
	461	0	0	0	0	0	0	0	0	0	0	0	0	0	0	0	0	0	0	0	0									461	0	0	0	0	0	0	0	0	0	0	0	0	0	0	0	0	0	0	0
	462	0	0	0	0	0	0	0	0	0	0	0	0	0	0	0	0	0	0	0	0									462	0	0	0	0	0	0	0	0	0	0	0	0	0	0	0	0	0	0	0
	463	0	0	0	0	0	0	0	0	0	0	0	0	0	0	0	0	0	0	0	0									463	0	0	0	0	0	0	0	0	0	0	0	0	0	0	0	0	0	0	0
	464	0	0	0	0	0	0	0	0	0	0	0	0	0	0	0	0	0	0	0	0									464	0	0	0	0	0	0	0	0	0	0	0	0	0	0	0	0	0	0	0
	465	0	0	0	0	0	0	0	0	0	0	0	0	0	0	0	0	0	0	0	0									465	0	0	0	0	0	0	0	0	0	0	0	0	0	0	0	0	0	0	0
	466	0	0	0	0	0	0	0	0	0	0	0	0	0	0	0	0	0	0	0	0									466	0	0	0	0	0	0	0	0	0	0	0	0	0	0	0	0	0	0	0
	467	0	0	0	0	0	0	0	0	0	0	0	0	0	0	0	0	0	0	0	0									467	0	0	0	0	0	0	0	0	0	0	0	0	0	0	0	0	0	0	0
	468	0	0	0	0	0	0	0	0	0	0	0	0	0	0	0	0	0	0	0	0									468	0	0	0	0	0	0	0	0	0	0	0	0	0	0	0	0	0	0	0
	469	0	0	0	0	0	0	0	0	0	0	0	0	0	0	0	0	0	0	0	0									469	0	0	0	0	0	0	0	0	0	0	0	0	0	0	0	0	0	0	0
	470	0	0	0	0	0	0	0	0	0	0	0	0	0	0	0	0	0	0	0	0									470	0	0	0	0	0	0	0	0	0	0	0	0	0	0	0	0	0	0	0
	471	0	0	0	0	0	0	0	0	0	0	0	0	0	0	0	0	0	0	0	0									471	0	0	0	0	0	0	0	0	0	0	0	0	0	0	0	0	0	0	0
	472	0	0	0	0	0	0	0	0	0	0	0	0	0	0	0	0	0	0	0	0									472	0	0	0	0	0	0	0	0	0	0	0	0	0	0	0	0	0	0	0
	473	0	0	0	0	0	0	0	0	0	0	0	0	0	0	0	0	0	0	0	0									473	0	0	0	0	0	0	0	0	0	0	0	0	0	0	0	0	0	0	0
	474	0	0	0	0	0	0	0	0	0	0	0	0	0	0	0	0	0	0	0	0									474	0	0	0	0	0	0	0	0	0	0	0	0	0	0	0	0	0	0	0
	475	0	0	0	0	0	0	0	0	0	0	0	0	0	0	0	0	0	0	0	0									475	0	0	0	0	0	0	0	0	0	0	0	0	0	0	0	0	0	0	0
	476	0	0	0	0	0	0	0	0	0	0	0	0	0	0	0	0	0	0	0	0									476	0	0	0	0	0	0	0	0	0	0	0	0	0	0	0	0	0	0	0
	477	0	0	0	0	0	0	0	0	0	0	0	0	0	0	0	0	0	0	0	0									477	0	0	0	0	0	0	0	0	0	0	0	0	0	0	0	0	0	0	0
	478	0	0	0	0	0	0	0	0	0	0	0	0	0	0	0	0	0	0	0	0									478	0	0	0	0	0	0	0	0	0	0	0	0	0	0	0	0	0	0	0
	479	0	0	0	0	0	0	0	0	0	0	0	0	0	0	0	0	0	0	0	0									479	0	0	0	0	0	0	0	0	0	0	0	0	0	0	0	0	0	0	0
	480	0	0	0	0	0	0	0	0	0	0	0	0	0	0	0	0	0	0	0	0									480	0	0	0	0	0	0	0	0	0	0	0	0	0	0	0	0	0	0	0
	481	0	0	0	0	0	0	0	0	0	0	0	0	0	0	0	0	0	0	0	0									481	0	0	0	0	0	0	0	0	0	0	0	0	0	0	0	0	0	0	0
	482	0	0	0	0	0	0	0	0	0	0	0	0	0	0	0	0	0	0	0	0									482	0	0	0	0	0	0	0	0	0	0	0	0	0	0	0	0	0	0	0
	483	0	0	0	0	0	0	0	0	0	0	0	0	0	0	0	0	0	0	0	0									483	0	0	0	0	0	0	0	0	0	0	0	0	0	0	0	0	0	0	0
	484	0	0	0	0	0	0	0	0	0	0	0	0	0	0	0	0	0	0	0	0									484	0	0	0	0	0	0	0	0	0	0	0	0	0	0	0	0	0	0	0
	485	0	0	0	0	0	0	0	0	0	0	0	0	0	0	0	0	0	0	0	0									485	0	0	0	0	0	0	0	0	0	0	0	0	0	0	0	0	0	0	0
	486	0	0	0	0	0	0	0	0	0	0	0	0	0	0	0	0	0	0	0	0									486	0	0	0	0	0	0	0	0	0	0	0	0	0	0	0	0	0	0	0
	487	0	0	0	0	0	0	0	0	0	0	0	0	0	0	0	0	0	0	0	0									487	0	0	0	0	0	0	0	0	0	0	0	0	0	0	0	0	0	0	0
	488	0	0	0	0	0	0	0	0	0	0	0	0	0	0	0	0	0	0	0	0									488	0	0	0	0	0	0	0	0	0	0	0	0	0	0	0	0	0	0	0
	489	0	0	0	0	0	0	0	0	0	0	0	0	0	0	0	0	0	0	0	0									489	0	0	0	0	0	0	0	0	0	0	0	0	0	0	0	0	0	0	0
	490	0	0	0	0	0	0	0	0	0	0	0	0	0	0	0	0	0	0	0	0									490	0	0	0	0	0	0	0	0	0	0	0	0	0	0	0	0	0	0	0
	491	0	0	0	0	0	0	0	0	0	0	0	0	0	0	0	0	0	0	0	0									491	0	0	0	0	0	0	0	0	0	0	0	0	0	0	0	0	0	0	0
	492	0	0	0	0	0	0	0	0	0	0	0	0	0	0	0	0	0	0	0	0									492	0	0	0	0	0	0	0	0	0	0	0	0	0	0	0	0	0	0	0
	493	0	0	0	0	0	0	0	0	0	0	0	0	0	0	0	0	0	0	0	0									493	0	0	0	0	0	0	0	0	0	0	0	0	0	0	0	0	0	0	0
	494	0	0	0	0	0	0	0	0	0	0	0	0	0	0	0	0	0	0	0	0									494	0	0	0	0	0	0	0	0	0	0	0	0	0	0	0	0	0	0	0
	495	0	0	0	0	0	0	0	0	0	0	0	0	0	0	0	0	0	0	0	0									495	0	0	0	0	0	0	0	0	0	0	0	0	0	0	0	0	0	0	0
	496	0	0	0	0	0	0	0	0	0	0	0	0	0	0	0	0	0	0	0	0									496	0	0	0	0	0	0	0	0	0	0	0	0	0	0	0	0	0	0	0
	497	0	0	0	0	0	0	0	0	0	0	0	0	0	0	0	0	0	0	0	0									497	0	0	0	0	0	0	0	0	0	0	0	0	0	0	0	0	0	0	0
	498	0	0	0	0	0	0	0	0	0	0	0	0	0	0	0	0	0	0	0	0									498	0	0	0	0	0	0	0	0	0	0	0	0	0	0	0	0	0	0	0
	499	0	0	0	0	0	0	0	0	0	0	0	0	0	0	0	0	0	0	0	0									499	0	0	0	0	0	0	0	0	0	0	0	0	0	0	0	0	0	0	0
	500	0	0	0	0	0	0	0	0	0	0	0	0	0	0	0	0	0	0	0	0									500	0	0	0	0	0	0	0	0	0	0	0	0	0	0	0	0	0	0	0
	501	0	0	0	0	0	0	0	0	0	0	0	0	0	0	0	0	0	0	0	0									501	0	0	0	0	0	0	0	0	0	0	0	0	0	0	0	0	0	0	0
	502	0	0	0	0	0	0	0	0	0	0	0	0	0	0	0	0	0	0	0	0									502	0	0	0	0	0	0	0	0	0	0	0	0	0	0	0	0	0	0	0
	503	0	0	0	0	0	0	0	0	0	0	0	0	0	0	0	0	0	0	0	0									503	0	0	0	0	0	0	0	0	0	0	0	0	0	0	0	0	0	0	0
	504	0	0	0	0	0	0	0	0	0	0	0	0	0	0	0	0	0	0	0	0									504	0	0	0	0	0	0	0	0	0	0	0	0	0	0	0	0	0	0	0
	505	0	0	0	0	0	0	0	0	0	0	0	0	0	0	0	0	0	0	0	0									505	0	0	0	0	0	0	0	0	0	0	0	0	0	0	0	0	0	0	0
	506	0	0	0	0	0	0	0	0	0	0	0	0	0	0	0	0	0	0	0	0									506	0	0	0	0	0	0	0	0	0	0	0	0	0	0	0	0	0	0	0
	507	0	0	0	0	0	0	0	0	0	0	0	0	0	0	0	0	0	0	0	0									507	0	0	0	0	0	0	0	0	0	0	0	0	0	0	0	0	0	0	0
	508	0	0	0	0	0	0	0	0	0	0	0	0	0	0	0	0	0	0	0	0									508	0	0	0	0	0	0	0	0	0	0	0	0	0	0	0	0	0	0	0
	509	0	0	0	0	0	0	0	0	0	0	0	0	0	0	0	0	0	0	0	0									509	0	0	0	0	0	0	0	0	0	0	0	0	0	0	0	0	0	0	0
	510	0	0	0	0	0	0	0	0	0	0	0	0	0	0	0	0	0	0	0	0									510	0	0	0	0	0	0	0	0	0	0	0	0	0	0	0	0	0	0	0
	511	0	0	0	0	0	0	0	0	0	0	0	0	0	0	0	0	0	0	0	0									511	0	0	0	0	0	0	0	0	0	0	0	0	0	0	0	0	0	0	0
	512	0	0	0	0	0	0	0	0	0	0	0	0	0	0	0	0	0	0	0	0									512	0	0	0	0	0	0	0	0	0	0	0	0	0	0	0	0	0	0	0
	513	0	0	0	0	0	0	0	0	0	0	0	0	0	0	0	0	0	0	0	0									513	0	0	0	0	0	0	0	0	0	0	0	0	0	0	0	0	0	0	0
	514	0	0	0	0	0	0	0	0	0	0	0	0	0	0	0	0	0	0	0	0									514	0	0	0	0	0	0	0	0	0	0	0	0	0	0	0	0	0	0	0
	515	0	0	0	0	0	0	0	0	0	0	0	0	0	0	0	0	0	0	0	0									515	0	0	0	0	0	0	0	0	0	0	0	0	0	0	0	0	0	0	0
	516	0	0	0	0	0	0	0	0	0	0	0	0	0	0	0	0	0	0	0	0									516	0	0	0	0	0	0	0	0	0	0	0	0	0	0	0	0	0	0	0
	517	0	0	0	0	0	0	0	0	0	0	0	0	0	0	0	0	0	0	0	0									517	0	0	0	0	0	0	0	0	0	0	0	0	0	0	0	0	0	0	0
	518	0	0	0	0	0	0	0	0	0	0	0	0	0	0	0	0	0	0	0	0									518	0	0	0	0	0	0	0	0	0	0	0	0	0	0	0	0	0	0	0
	519	0	0	0	0	0	0	0	0	0	0	0	0	0	0	0	0	0	0	0	0									519	0	0	0	0	0	0	0	0	0	0	0	0	0	0	0	0	0	0	0
	520	0	0	0	0	0	0	0	0	0	0	0	0	0	0	0	0	0	0	0	0									520	0	0	0	0	0	0	0	0	0	0	0	0	0	0	0	0	0	0	0
	521	0	0	0	0	0	0	0	0	0	0	0	0	0	0	0	0	0	0	0	0									521	0	0	0	0	0	0	0	0	0	0	0	0	0	0	0	0	0	0	0
	522	0	0	0	0	0	0	0	0	0	0	0	0	0	0	0	0	0	0	0	0									522	0	0	0	0	0	0	0	0	0	0	0	0	0	0	0	0	0	0	0
	523	0	0	0	0	0	0	0	0	0	0	0	0	0	0	0	0	0	0	0	0									523	0	0	0	0	0	0	0	0	0	0	0	0	0	0	0	0	0	0	0
	524	0	0	0	0	0	0	0	0	0	0	0	0	0	0	0	0	0	0	0	0									524	0	0	0	0	0	0	0	0	0	0	0	0	0	0	0	0	0	0	0
	525	0	0	0	0	0	0	0	0	0	0	0	0	0	0	0	0	0	0	0	0									525	0	0	0	0	0	0	0	0	0	0	0	0	0	0	0	0	0	0	0
	526	0	0	0	0	0	0	0	0	0	0	0	0	0	0	0	0	0	0	0	0									526	0	0	0	0	0	0	0	0	0	0	0	0	0	0	0	0	0	0	0
	527	0	0	0	0	0	0	0	0	0	0	0	0	0	0	0	0	0	0	0	0									527	0	0	0	0	0	0	0	0	0	0	0	0	0	0	0	0	0	0	0
	528	0	0	0	0	0	0	0	0	0	0	0	0	0	0	0	0	0	0	0	0									528	0	0	0	0	0	0	0	0	0	0	0	0	0	0	0	0	0	0	0
	529	0	0	0	0	0	0	0	0	0	0	0	0	0	0	0	0	0	0	0	0									529	0	0	0	0	0	0	0	0	0	0	0	0	0	0	0	0	0	0	0
	530	0	0	0	0	0	0	0	0	0	0	0	0	0	0	0	0	0	0	0	0									530	0	0	0	0	0	0	0	0	0	0	0	0	0	0	0	0	0	0	0
	531	0	0	0	0	0	0	0	0	0	0	0	0	0	0	0	0	0	0	0	0									531	0	0	0	0	0	0	0	0	0	0	0	0	0	0	0	0	0	0	0
	532	0	0	0	0	0	0	0	0	0	0	0	0	0	0	0	0	0	0	0	0									532	0	0	0	0	0	0	0	0	0	0	0	0	0	0	0	0	0	0	0
	533	0	0	0	0	0	0	0	0	0	0	0	0	0	0	0	0	0	0	0	0									533	0	0	0	0	0	0	0	0	0	0	0	0	0	0	0	0	0	0	0
	534	0	0	0	0	0	0	0	0	0	0	0	0	0	0	0	0	0	0	0	0									534	0	0	0	0	0	0	0	0	0	0	0	0	0	0	0	0	0	0	0
	535	0	0	0	0	0	0	0	0	0	0	0	0	0	0	0	0	0	0	0	0									535	0	0	0	0	0	0	0	0	0	0	0	0	0	0	0	0	0	0	0
	536	0	0	0	0	0	0	0	0	0	0	0	0	0	0	0	0	0	0	0	0									536	0	0	0	0	0	0	0	0	0	0	0	0	0	0	0	0	0	0	0
	537	0	0	0	0	0	0	0	0	0	0	0	0	0	0	0	0	0	0	0	0									537	0	0	0	0	0	0	0	0	0	0	0	0	0	0	0	0	0	0	0
	538	0	0	0	0	0	0	0	0	0	0	0	0	0	0	0	0	0	0	0	0									538	0	0	0	0	0	0	0	0	0	0	0	0	0	0	0	0	0	0	0
	539	0	0	0	0	0	0	0	0	0	0	0	0	0	0	0	0	0	0	0	0									539	0	0	0	0	0	0	0	0	0	0	0	0	0	0	0	0	0	0	0
	540	0	0	0	0	0	0	0	0	0	0	0	0	0	0	0	0	0	0	0	0									540	0	0	0	0	0	0	0	0	0	0	0	0	0	0	0	0	0	0	0
	541	0	0	0	0	0	0	0	0	0	0	0	0	0	0	0	0	0	0	0	0									541	0	0	0	0	0	0	0	0	0	0	0	0	0	0	0	0	0	0	0
	542	0	0	0	0	0	0	0	0	0	0	0	0	0	0	0	0	0	0	0	0									542	0	0	0	0	0	0	0	0	0	0	0	0	0	0	0	0	0	0	0
	543	0	0	0	0	0	0	0	0	0	0	0	0	0	0	0	0	0	0	0	0									543	0	0	0	0	0	0	0	0	0	0	0	0	0	0	0	0	0	0	0
	544	0	0	0	0	0	0	0	0	0	0	0	0	0	0	0	0	0	0	0	0									544	0	0	0	0	0	0	0	0	0	0	0	0	0	0	0	0	0	0	0
	545	0	0	0	0	0	0	0	0	0	0	0	0	0	0	0	0	0	0	0	0									545	0	0	0	0	0	0	0	0	0	0	0	0	0	0	0	0	0	0	0
	546	0	0	0	0	0	0	0	0	0	0	0	0	0	0	0	0	0	0	0	0									546	0	0	0	0	0	0	0	0	0	0	0	0	0	0	0	0	0	0	0
	547	0	0	0	0	0	0	0	0	0	0	0	0	0	0	0	0	0	0	0	0									547	0	0	0	0	0	0	0	0	0	0	0	0	0	0	0	0	0	0	0
	548	0	0	0	0	0	0	0	0	0	0	0	0	0	0	0	0	0	0	0	0									548	0	0	0	0	0	0	0	0	0	0	0	0	0	0	0	0	0	0	0
	549	0	0	0	0	0	0	0	0	0	0	0	0	0	0	0	0	0	0	0	0									549	0	0	0	0	0	0	0	0	0	0	0	0	0	0	0	0	0	0	0
	550	0	0	0	0	0	0	0	0	0	0	0	0	0	0	0	0	0	0	0	0									550	0	0	0	0	0	0	0	0	0	0	0	0	0	0	0	0	0	0	0
	551	0	0	0	0	0	0	0	0	0	0	0	0	0	0	0	0	0	0	0	0									551	0	0	0	0	0	0	0	0	0	0	0	0	0	0	0	0	0	0	0
	552	0	0	0	0	0	0	0	0	0	0	0	0	0	0	0	0	0	0	0	0									552	0	0	0	0	0	0	0	0	0	0	0	0	0	0	0	0	0	0	0
	553	0	0	0	0	0	0	0	0	0	0	0	0	0	0	0	0	0	0	0	0									553	0	0	0	0	0	0	0	0	0	0	0	0	0	0	0	0	0	0	0
	554	0	0	0	0	0	0	0	0	0	0	0	0	0	0	0	0	0	0	0	0									554	0	0	0	0	0	0	0	0	0	0	0	0	0	0	0	0	0	0	0
	555	0	0	0	0	0	0	0	0	0	0	0	0	0	0	0	0	0	0	0	0									555	0	0	0	0	0	0	0	0	0	0	0	0	0	0	0	0	0	0	0
	556	0	0	0	0	0	0	0	0	0	0	0	0	0	0	0	0	0	0	0	0									556	0	0	0	0	0	0	0	0	0	0	0	0	0	0	0	0	0	0	0
	557	0	0	0	0	0	0	0	0	0	0	0	0	0	0	0	0	0	0	0	0									557	0	0	0	0	0	0	0	0	0	0	0	0	0	0	0	0	0	0	0
	558	0	0	0	0	0	0	0	0	0	0	0	0	0	0	0	0	0	0	0	0									558	0	0	0	0	0	0	0	0	0	0	0	0	0	0	0	0	0	0	0
	559	0	0	0	0	0	0	0	0	0	0	0	0	0	0	0	0	0	0	0	0									559	0	0	0	0	0	0	0	0	0	0	0	0	0	0	0	0	0	0	0
	560	0	0	0	0	0	0	0	0	0	0	0	0	0	0	0	0	0	0	0	0									560	0	0	0	0	0	0	0	0	0	0	0	0	0	0	0	0	0	0	0
	561	0	0	0	0	0	0	0	0	0	0	0	0	0	0	0	0	0	0	0	0									561	0	0	0	0	0	0	0	0	0	0	0	0	0	0	0	0	0	0	0
	562	0	0	0	0	0	0	0	0	0	0	0	0	0	0	0	0	0	0	0	0									562	0	0	0	0	0	0	0	0	0	0	0	0	0	0	0	0	0	0	0
	563	0	0	0	0	0	0	0	0	0	0	0	0	0	0	0	0	0	0	0	0									563	0	0	0	0	0	0	0	0	0	0	0	0	0	0	0	0	0	0	0
	564	0	0	0	0	0	0	0	0	0	0	0	0	0	0	0	0	0	0	0	0									564	0	0	0	0	0	0	0	0	0	0	0	0	0	0	0	0	0	0	0
	565	0	0	0	0	0	0	0	0	0	0	0	0	0	0	0	0	0	0	0	0									565	0	0	0	0	0	0	0	0	0	0	0	0	0	0	0	0	0	0	0
	566	0	0	0	0	0	0	0	0	0	0	0	0	0	0	0	0	0	0	0	0									566	0	0	0	0	0	0	0	0	0	0	0	0	0	0	0	0	0	0	0
	567	0	0	0	0	0	0	0	0	0	0	0	0	0	0	0	0	0	0	0	0									567	0	0	0	0	0	0	0	0	0	0	0	0	0	0	0	0	0	0	0
	568	0	0	0	0	0	0	0	0	0	0	0	0	0	0	0	0	0	0	0	0									568	0	0	0	0	0	0	0	0	0	0	0	0	0	0	0	0	0	0	0
	569	0	0	0	0	0	0	0	0	0	0	0	0	0	0	0	0	0	0	0	0									569	0	0	0	0	0	0	0	0	0	0	0	0	0	0	0	0	0	0	0
	570	0	0	0	0	0	0	0	0	0	0	0	0	0	0	0	0	0	0	0	0									570	0	0	0	0	0	0	0	0	0	0	0	0	0	0	0	0	0	0	0
	571	0	0	0	0	0	0	0	0	0	0	0	0	0	0	0	0	0	0	0	0									571	0	0	0	0	0	0	0	0	0	0	0	0	0	0	0	0	0	0	0
	572	0	0	0	0	0	0	0	0	0	0	0	0	0	0	0	0	0	0	0	0									572	0	0	0	0	0	0	0	0	0	0	0	0	0	0	0	0	0	0	0
	573	0	0	0	0	0	0	0	0	0	0	0	0	0	0	0	0	0	0	0	0									573	0	0	0	0	0	0	0	0	0	0	0	0	0	0	0	0	0	0	0
	574	0	0	0	0	0	0	0	0	0	0	0	0	0	0	0	0	0	0	0	0									574	0	0	0	0	0	0	0	0	0	0	0	0	0	0	0	0	0	0	0
	575	0	0	0	0	0	0	0	0	0	0	0	0	0	0	0	0	0	0	0	0									575	0	0	0	0	0	0	0	0	0	0	0	0	0	0	0	0	0	0	0
	576	0	0	0	0	0	0	0	0	0	0	0	0	0	0	0	0	0	0	0	0									576	0	0	0	0	0	0	0	0	0	0	0	0	0	0	0	0	0	0	0
	577	0	0	0	0	0	0	0	0	0	0	0	0	0	0	0	0	0	0	0	0									577	0	0	0	0	0	0	0	0	0	0	0	0	0	0	0	0	0	0	0
	578	0	0	0	0	0	0	0	0	0	0	0	0	0	0	0	0	0	0	0	0									578	0	0	0	0	0	0	0	0	0	0	0	0	0	0	0	0	0	0	0
	579	0	0	0	0	0	0	0	0	0	0	0	0	0	0	0	0	0	0	0	0									579	0	0	0	0	0	0	0	0	0	0	0	0	0	0	0	0	0	0	0
	580	0	0	0	0	0	0	0	0	0	0	0	0	0	0	0	0	0	0	0	0									580	0	0	0	0	0	0	0	0	0	0	0	0	0	0	0	0	0	0	0
	581	0	0	0	0	0	0	0	0	0	0	0	0	0	0	0	0	0	0	0	0									581	0	0	0	0	0	0	0	0	0	0	0	0	0	0	0	0	0	0	0
	582	0	0	0	0	0	0	0	0	0	0	0	0	0	0	0	0	0	0	0	0									582	0	0	0	0	0	0	0	0	0	0	0	0	0	0	0	0	0	0	0
	583	0	0	0	0	0	0	0	0	0	0	0	0	0	0	0	0	0	0	0	0									583	0	0	0	0	0	0	0	0	0	0	0	0	0	0	0	0	0	0	0
	584	0	0	0	0	0	0	0	0	0	0	0	0	0	0	0	0	0	0	0	0									584	0	0	0	0	0	0	0	0	0	0	0	0	0	0	0	0	0	0	0
	585	0	0	0	0	0	0	0	0	0	0	0	0	0	0	0	0	0	0	0	0									585	0	0	0	0	0	0	0	0	0	0	0	0	0	0	0	0	0	0	0
	586	0	0	0	0	0	0	0	0	0	0	0	0	0	0	0	0	0	0	0	0									586	0	0	0	0	0	0	0	0	0	0	0	0	0	0	0	0	0	0	0
	587	0	0	0	0	0	0	0	0	0	0	0	0	0	0	0	0	0	0	0	0									587	0	0	0	0	0	0	0	0	0	0	0	0	0	0	0	0	0	0	0
	588	0	0	0	0	0	0	0	0	0	0	0	0	0	0	0	0	0	0	0	0									588	0	0	0	0	0	0	0	0	0	0	0	0	0	0	0	0	0	0	0
	589	0	0	0	0	0	0	0	0	0	0	0	0	0	0	0	0	0	0	0	0									589	0	0	0	0	0	0	0	0	0	0	0	0	0	0	0	0	0	0	0
	590	0	0	0	0	0	0	0	0	0	0	0	0	0	0	0	0	0	0	0	0									590	0	0	0	0	0	0	0	0	0	0	0	0	0	0	0	0	0	0	0
	591	0	0	0	0	0	0	0	0	0	0	0	0	0	0	0	0	0	0	0	0									591	0	0	0	0	0	0	0	0	0	0	0	0	0	0	0	0	0	0	0
	592	0	0	0	0	0	0	0	0	0	0	0	0	0	0	0	0	0	0	0	0									592	0	0	0	0	0	0	0	0	0	0	0	0	0	0	0	0	0	0	0
	593	0	0	0	0	0	0	0	0	0	0	0	0	0	0	0	0	0	0	0	0									593	0	0	0	0	0	0	0	0	0	0	0	0	0	0	0	0	0	0	0
	594	0	0	0	0	0	0	0	0	0	0	0	0	0	0	0	0	0	0	0	0									594	0	0	0	0	0	0	0	0	0	0	0	0	0	0	0	0	0	0	0
	595	0	0	0	0	0	0	0	0	0	0	0	0	0	0	0	0	0	0	0	0									595	0	0	0	0	0	0	0	0	0	0	0	0	0	0	0	0	0	0	0
	596	0	0	0	0	0	0	0	0	0	0	0	0	0	0	0	0	0	0	0	0									596	0	0	0	0	0	0	0	0	0	0	0	0	0	0	0	0	0	0	0
	597	0	0	0	0	0	0	0	0	0	0	0	0	0	0	0	0	0	0	0	0									597	0	0	0	0	0	0	0	0	0	0	0	0	0	0	0	0	0	0	0
	598	0	0	0	0	0	0	0	0	0	0	0	0	0	0	0	0	0	0	0	0									598	0	0	0	0	0	0	0	0	0	0	0	0	0	0	0	0	0	0	0
	599	0	0	0	0	0	0	0	0	0	0	0	0	0	0	0	0	0	0	0	0									599	0	0	0	0	0	0	0	0	0	0	0	0	0	0	0	0	0	0	0
	600	0	0	0	0	0	0	0	0	0	0	0	0	0	0	0	0	0	0	0	0									600	0	0	0	0	0	0	0	0	0	0	0	0	0	0	0	0	0	0	0
	601	0	0	0	0	0	0	0	0	0	0	0	0	0	0	0	0	0	0	0	0									601	0	0	0	0	0	0	0	0	0	0	0	0	0	0	0	0	0	0	0
	602	0	0	0	0	0	0	0	0	0	0	0	0	0	0	0	0	0	0	0	0									602	0	0	0	0	0	0	0	0	0	0	0	0	0	0	0	0	0	0	0
	603	0	0	0	0	0	0	0	0	0	0	0	0	0	0	0	0	0	0	0	0									603	0	0	0	0	0	0	0	0	0	0	0	0	0	0	0	0	0	0	0
	604	0	0	0	0	0	0	0	0	0	0	0	0	0	0	0	0	0	0	0	0									604	0	0	0	0	0	0	0	0	0	0	0	0	0	0	0	0	0	0	0
	605	0	0	0	0	0	0	0	0	0	0	0	0	0	0	0	0	0	0	0	0									605	0	0	0	0	0	0	0	0	0	0	0	0	0	0	0	0	0	0	0
	606	0	0	0	0	0	0	0	0	0	0	0	0	0	0	0	0	0	0	0	0									606	0	0	0	0	0	0	0	0	0	0	0	0	0	0	0	0	0	0	0
	607	0	0	0	0	0	0	0	0	0	0	0	0	0	0	0	0	0	0	0	0									607	0	0	0	0	0	0	0	0	0	0	0	0	0	0	0	0	0	0	0
	608	0	0	0	0	0	0	0	0	0	0	0	0	0	0	0	0	0	0	0	0									608	0	0	0	0	0	0	0	0	0	0	0	0	0	0	0	0	0	0	0
	609	0	0	0	0	0	0	0	0	0	0	0	0	0	0	0	0	0	0	0	0									609	0	0	0	0	0	0	0	0	0	0	0	0	0	0	0	0	0	0	0
	610	0	0	0	0	0	0	0	0	0	0	0	0	0	0	0	0	0	0	0	0									610	0	0	0	0	0	0	0	0	0	0	0	0	0	0	0	0	0	0	0
	611	0	0	0	0	0	0	0	0	0	0	0	0	0	0	0	0	0	0	0	0									611	0	0	0	0	0	0	0	0	0	0	0	0	0	0	0	0	0	0	0
	612	0	0	0	0	0	0	0	0	0	0	0	0	0	0	0	0	0	0	0	0									612	0	0	0	0	0	0	0	0	0	0	0	0	0	0	0	0	0	0	0
	613	0	0	0	0	0	0	0	0	0	0	0	0	0	0	0	0	0	0	0	0									613	0	0	0	0	0	0	0	0	0	0	0	0	0	0	0	0	0	0	0
	614	0	0	0	0	0	0	0	0	0	0	0	0	0	0	0	0	0	0	0	0									614	0	0	0	0	0	0	0	0	0	0	0	0	0	0	0	0	0	0	0
	615	0	0	0	0	0	0	0	0	0	0	0	0	0	0	0	0	0	0	0	0									615	0	0	0	0	0	0	0	0	0	0	0	0	0	0	0	0	0	0	0
	616	0	0	0	0	0	0	0	0	0	0	0	0	0	0	0	0	0	0	0	0									616	0	0	0	0	0	0	0	0	0	0	0	0	0	0	0	0	0	0	0
	617	0	0	0	0	0	0	0	0	0	0	0	0	0	0	0	0	0	0	0	0									617	0	0	0	0	0	0	0	0	0	0	0	0	0	0	0	0	0	0	0
	618	0	0	0	0	0	0	0	0	0	0	0	0	0	0	0	0	0	0	0	0									618	0	0	0	0	0	0	0	0	0	0	0	0	0	0	0	0	0	0	0
	619	0	0	0	0	0	0	0	0	0	0	0	0	0	0	0	0	0	0	0	0									619	0	0	0	0	0	0	0	0	0	0	0	0	0	0	0	0	0	0	0
	620	0	0	0	0	0	0	0	0	0	0	0	0	0	0	0	0	0	0	0	0									620	0	0	0	0	0	0	0	0	0	0	0	0	0	0	0	0	0	0	0
	621	0	0	0	0	0	0	0	0	0	0	0	0	0	0	0	0	0	0	0	0									621	0	0	0	0	0	0	0	0	0	0	0	0	0	0	0	0	0	0	0
	622	0	0	0	0	0	0	0	0	0	0	0	0	0	0	0	0	0	0	0	0									622	0	0	0	0	0	0	0	0	0	0	0	0	0	0	0	0	0	0	0
	623	0	0	0	0	0	0	0	0	0	0	0	0	0	0	0	0	0	0	0	0									623	0	0	0	0	0	0	0	0	0	0	0	0	0	0	0	0	0	0	0
	624	0	0	0	0	0	0	0	0	0	0	0	0	0	0	0	0	0	0	0	0									624	0	0	0	0	0	0	0	0	0	0	0	0	0	0	0	0	0	0	0
	625	0	0	0	0	0	0	0	0	0	0	0	0	0	0	0	0	0	0	0	0									625	0	0	0	0	0	0	0	0	0	0	0	0	0	0	0	0	0	0	0
	626	0	0	0	0	0	0	0	0	0	0	0	0	0	0	0	0	0	0	0	0									626	0	0	0	0	0	0	0	0	0	0	0	0	0	0	0	0	0	0	0
	627	0	0	0	0	0	0	0	0	0	0	0	0	0	0	0	0	0	0	0	0									627	0	0	0	0	0	0	0	0	0	0	0	0	0	0	0	0	0	0	0
	628	0	0	0	0	0	0	0	0	0	0	0	0	0	0	0	0	0	0	0	0									628	0	0	0	0	0	0	0	0	0	0	0	0	0	0	0	0	0	0	0
	629	0	0	0	0	0	0	0	0	0	0	0	0	0	0	0	0	0	0	0	0									629	0	0	0	0	0	0	0	0	0	0	0	0	0	0	0	0	0	0	0
	630	0	0	0	0	0	0	0	0	0	0	0	0	0	0	0	0	0	0	0	0									630	0	0	0	0	0	0	0	0	0	0	0	0	0	0	0	0	0	0	0
	631	0	0	0	0	0	0	0	0	0	0	0	0	0	0	0	0	0	0	0	0									631	0	0	0	0	0	0	0	0	0	0	0	0	0	0	0	0	0	0	0
	632	0	0	0	0	0	0	0	0	0	0	0	0	0	0	0	0	0	0	0	0									632	0	0	0	0	0	0	0	0	0	0	0	0	0	0	0	0	0	0	0
	633	0	0	0	0	0	0	0	0	0	0	0	0	0	0	0	0	0	0	0	0									633	0	0	0	0	0	0	0	0	0	0	0	0	0	0	0	0	0	0	0
	634	0	0	0	0	0	0	0	0	0	0	0	0	0	0	0	0	0	0	0	0									634	0	0	0	0	0	0	0	0	0	0	0	0	0	0	0	0	0	0	0
	635	0	0	0	0	0	0	0	0	0	0	0	0	0	0	0	0	0	0	0	0									635	0	0	0	0	0	0	0	0	0	0	0	0	0	0	0	0	0	0	0
	636	0	0	0	0	0	0	0	0	0	0	0	0	0	0	0	0	0	0	0	0									636	0	0	0	0	0	0	0	0	0	0	0	0	0	0	0	0	0	0	0
	637	0	0	0	0	0	0	0	0	0	0	0	0	0	0	0	0	0	0	0	0									637	0	0	0	0	0	0	0	0	0	0	0	0	0	0	0	0	0	0	0
	638	0	0	0	0	0	0	0	0	0	0	0	0	0	0	0	0	0	0	0	0									638	0	0	0	0	0	0	0	0	0	0	0	0	0	0	0	0	0	0	0
	639	0	0	0	0	0	0	0	0	0	0	0	0	0	0	0	0	0	0	0	0									639	0	0	0	0	0	0	0	0	0	0	0	0	0	0	0	0	0	0	0
	640	0	0	0	0	0	0	0	0	0	0	0	0	0	0	0	0	0	0	0	0									640	0	0	0	0	0	0	0	0	0	0	0	0	0	0	0	0	0	0	0
	641	0	0	0	0	0	0	0	0	0	0	0	0	0	0	0	0	0	0	0	0									641	0	0	0	0	0	0	0	0	0	0	0	0	0	0	0	0	0	0	0
	642	0	0	0	0	0	0	0	0	0	0	0	0	0	0	0	0	0	0	0	0									642	0	0	0	0	0	0	0	0	0	0	0	0	0	0	0	0	0	0	0
	643	0	0	0	0	0	0	0	0	0	0	0	0	0	0	0	0	0	0	0	0									643	0	0	0	0	0	0	0	0	0	0	0	0	0	0	0	0	0	0	0
	644	0	0	0	0	0	0	0	0	0	0	0	0	0	0	0	0	0	0	0	0									644	0	0	0	0	0	0	0	0	0	0	0	0	0	0	0	0	0	0	0
	645	0	0	0	0	0	0	0	0	0	0	0	0	0	0	0	0	0	0	0	0									645	0	0	0	0	0	0	0	0	0	0	0	0	0	0	0	0	0	0	0
	646	0	0	0	0	0	0	0	0	0	0	0	0	0	0	0	0	0	0	0	0									646	0	0	0	0	0	0	0	0	0	0	0	0	0	0	0	0	0	0	0
	647	0	0	0	0	0	0	0	0	0	0	0	0	0	0	0	0	0	0	0	0									647	0	0	0	0	0	0	0	0	0	0	0	0	0	0	0	0	0	0	0
	648	0	0	0	0	0	0	0	0	0	0	0	0	0	0	0	0	0	0	0	0									648	0	0	0	0	0	0	0	0	0	0	0	0	0	0	0	0	0	0	0
	649	0	0	0	0	0	0	0	0	0	0	0	0	0	0	0	0	0	0	0	0									649	0	0	0	0	0	0	0	0	0	0	0	0	0	0	0	0	0	0	0
	650	0	0	0	0	0	0	0	0	0	0	0	0	0	0	0	0	0	0	0	0									650	0	0	0	0	0	0	0	0	0	0	0	0	0	0	0	0	0	0	0
	651	0	0	0	0	0	0	0	0	0	0	0	0	0	0	0	0	0	0	0	0									651	0	0	0	0	0	0	0	0	0	0	0	0	0	0	0	0	0	0	0
	652	0	0	0	0	0	0	0	0	0	0	0	0	0	0	0	0	0	0	0	0									652	0	0	0	0	0	0	0	0	0	0	0	0	0	0	0	0	0	0	0
	653	0	0	0	0	0	0	0	0	0	0	0	0	0	0	0	0	0	0	0	0									653	0	0	0	0	0	0	0	0	0	0	0	0	0	0	0	0	0	0	0
	654	0	0	0	0	0	0	0	0	0	0	0	0	0	0	0	0	0	0	0	0									654	0	0	0	0	0	0	0	0	0	0	0	0	0	0	0	0	0	0	0
	655	0	0	0	0	0	0	0	0	0	0	0	0	0	0	0	0	0	0	0	0									655	0	0	0	0	0	0	0	0	0	0	0	0	0	0	0	0	0	0	0
	656	0	0	0	0	0	0	0	0	0	0	0	0	0	0	0	0	0	0	0	0									656	0	0	0	0	0	0	0	0	0	0	0	0	0	0	0	0	0	0	0
	657	0	0	0	0	0	0	0	0	0	0	0	0	0	0	0	0	0	0	0	0									657	0	0	0	0	0	0	0	0	0	0	0	0	0	0	0	0	0	0	0
	658	0	0	0	0	0	0	0	0	0	0	0	0	0	0	0	0	0	0	0	0									658	0	0	0	0	0	0	0	0	0	0	0	0	0	0	0	0	0	0	0
	659	0	0	0	0	0	0	0	0	0	0	0	0	0	0	0	0	0	0	0	0									659	0	0	0	0	0	0	0	0	0	0	0	0	0	0	0	0	0	0	0
	660	0	0	0	0	0	0	0	0	0	0	0	0	0	0	0	0	0	0	0	0									660	0	0	0	0	0	0	0	0	0	0	0	0	0	0	0	0	0	0	0
	661	0	0	0	0	0	0	0	0	0	0	0	0	0	0	0	0	0	0	0	0									661	0	0	0	0	0	0	0	0	0	0	0	0	0	0	0	0	0	0	0
	662	0	0	0	0	0	0	0	0	0	0	0	0	0	0	0	0	0	0	0	0									662	0	0	0	0	0	0	0	0	0	0	0	0	0	0	0	0	0	0	0
	663	0	0	0	0	0	0	0	0	0	0	0	0	0	0	0	0	0	0	0	0									663	0	0	0	0	0	0	0	0	0	0	0	0	0	0	0	0	0	0	0
	664	0	0	0	0	0	0	0	0	0	0	0	0	0	0	0	0	0	0	0	0									664	0	0	0	0	0	0	0	0	0	0	0	0	0	0	0	0	0	0	0
	665	0	0	0	0	0	0	0	0	0	0	0	0	0	0	0	0	0	0	0	0									665	0	0	0	0	0	0	0	0	0	0	0	0	0	0	0	0	0	0	0
	666	0	0	0	0	0	0	0	0	0	0	0	0	0	0	0	0	0	0	0	0									666	0	0	0	0	0	0	0	0	0	0	0	0	0	0	0	0	0	0	0
	667	0	0	0	0	0	0	0	0	0	0	0	0	0	0	0	0	0	0	0	0									667	0	0	0	0	0	0	0	0	0	0	0	0	0	0	0	0	0	0	0
	668	0	0	0	0	0	0	0	0	0	0	0	0	0	0	0	0	0	0	0	0									668	0	0	0	0	0	0	0	0	0	0	0	0	0	0	0	0	0	0	0
	669	0	0	0	0	0	0	0	0	0	0	0	0	0	0	0	0	0	0	0	0									669	0	0	0	0	0	0	0	0	0	0	0	0	0	0	0	0	0	0	0
	670	0	0	0	0	0	0	0	0	0	0	0	0	0	0	0	0	0	0	0	0									670	0	0	0	0	0	0	0	0	0	0	0	0	0	0	0	0	0	0	0
	671	0	0	0	0	0	0	0	0	0	0	0	0	0	0	0	0	0	0	0	0									671	0	0	0	0	0	0	0	0	0	0	0	0	0	0	0	0	0	0	0
	672	0	0	0	0	0	0	0	0	0	0	0	0	0	0	0	0	0	0	0	0									672	0	0	0	0	0	0	0	0	0	0	0	0	0	0	0	0	0	0	0
	673	0	0	0	0	0	0	0	0	0	0	0	0	0	0	0	0	0	0	0	0									673	0	0	0	0	0	0	0	0	0	0	0	0	0	0	0	0	0	0	0
	674	0	0	0	0	0	0	0	0	0	0	0	0	0	0	0	0	0	0	0	0									674	0	0	0	0	0	0	0	0	0	0	0	0	0	0	0	0	0	0	0
	675	0	0	0	0	0	0	0	0	0	0	0	0	0	0	0	0	0	0	0	0									675	0	0	0	0	0	0	0	0	0	0	0	0	0	0	0	0	0	0	0
	676	0	0	0	0	0	0	0	0	0	0	0	0	0	0	0	0	0	0	0	0									676	0	0	0	0	0	0	0	0	0	0	0	0	0	0	0	0	0	0	0
	677	0	0	0	0	0	0	0	0	0	0	0	0	0	0	0	0	0	0	0	0									677	0	0	0	0	0	0	0	0	0	0	0	0	0	0	0	0	0	0	0
	678	0	0	0	0	0	0	0	0	0	0	0	0	0	0	0	0	0	0	0	0									678	0	0	0	0	0	0	0	0	0	0	0	0	0	0	0	0	0	0	0
	679	0	0	0	0	0	0	0	0	0	0	0	0	0	0	0	0	0	0	0	0									679	0	0	0	0	0	0	0	0	0	0	0	0	0	0	0	0	0	0	0
	680	0	0	0	0	0	0	0	0	0	0	0	0	0	0	0	0	0	0	0	0									680	0	0	0	0	0	0	0	0	0	0	0	0	0	0	0	0	0	0	0
	681	0	0	0	0	0	0	0	0	0	0	0	0	0	0	0	0	0	0	0	0									681	0	0	0	0	0	0	0	0	0	0	0	0	0	0	0	0	0	0	0
	682	0	0	0	0	0	0	0	0	0	0	0	0	0	0	0	0	0	0	0	0									682	0	0	0	0	0	0	0	0	0	0	0	0	0	0	0	0	0	0	0
	683	0	0	0	0	0	0	0	0	0	0	0	0	0	0	0	0	0	0	0	0									683	0	0	0	0	0	0	0	0	0	0	0	0	0	0	0	0	0	0	0
	684	0	0	0	0	0	0	0	0	0	0	0	0	0	0	0	0	0	0	0	0									684	0	0	0	0	0	0	0	0	0	0	0	0	0	0	0	0	0	0	0
	685	0	0	0	0	0	0	0	0	0	0	0	0	0	0	0	0	0	0	0	0									685	0	0	0	0	0	0	0	0	0	0	0	0	0	0	0	0	0	0	0
	686	0	0	0	0	0	0	0	0	0	0	0	0	0	0	0	0	0	0	0	0									686	0	0	0	0	0	0	0	0	0	0	0	0	0	0	0	0	0	0	0
	687	0	0	0	0	0	0	0	0	0	0	0	0	0	0	0	0	0	0	0	0									687	0	0	0	0	0	0	0	0	0	0	0	0	0	0	0	0	0	0	0
	688	0	0	0	0	0	0	0	0	0	0	0	0	0	0	0	0	0	0	0	0									688	0	0	0	0	0	0	0	0	0	0	0	0	0	0	0	0	0	0	0
	689	0	0	0	0	0	0	0	0	0	0	0	0	0	0	0	0	0	0	0	0									689	0	0	0	0	0	0	0	0	0	0	0	0	0	0	0	0	0	0	0
	690	0	0	0	0	0	0	0	0	0	0	0	0	0	0	0	0	0	0	0	0									690	0	0	0	0	0	0	0	0	0	0	0	0	0	0	0	0	0	0	0
	691	0	0	0	0	0	0	0	0	0	0	0	0	0	0	0	0	0	0	0	0									691	0	0	0	0	0	0	0	0	0	0	0	0	0	0	0	0	0	0	0
	692	0	0	0	0	0	0	0	0	0	0	0	0	0	0	0	0	0	0	0	0									692	0	0	0	0	0	0	0	0	0	0	0	0	0	0	0	0	0	0	0
	693	0	0	0	0	0	0	0	0	0	0	0	0	0	0	0	0	0	0	0	0									693	0	0	0	0	0	0	0	0	0	0	0	0	0	0	0	0	0	0	0
	694	0	0	0	0	0	0	0	0	0	0	0	0	0	0	0	0	0	0	0	0									694	0	0	0	0	0	0	0	0	0	0	0	0	0	0	0	0	0	0	0
	695	0	0	0	0	0	0	0	0	0	0	0	0	0	0	0	0	0	0	0	0									695	0	0	0	0	0	0	0	0	0	0	0	0	0	0	0	0	0	0	0
	696	0	0	0	0	0	0	0	0	0	0	0	0	0	0	0	0	0	0	0	0									696	0	0	0	0	0	0	0	0	0	0	0	0	0	0	0	0	0	0	0
	697	0	0	0	0	0	0	0	0	0	0	0	0	0	0	0	0	0	0	0	0									697	0	0	0	0	0	0	0	0	0	0	0	0	0	0	0	0	0	0	0
	698	0	0	0	0	0	0	0	0	0	0	0	0	0	0	0	0	0	0	0	0									698	0	0	0	0	0	0	0	0	0	0	0	0	0	0	0	0	0	0	0
	699	0	0	0	0	0	0	0	0	0	0	0	0	0	0	0	0	0	0	0	0									699	0	0	0	0	0	0	0	0	0	0	0	0	0	0	0	0	0	0	0
	700	0	0	0	0	0	0	0	0	0	0	0	0	0	0	0	0	0	0	0	0									700	0	0	0	0	0	0	0	0	0	0	0	0	0	0	0	0	0	0	0
	701	0	0	0	0	0	0	0	0	0	0	0	0	0	0	0	0	0	0	0	0									701	0	0	0	0	0	0	0	0	0	0	0	0	0	0	0	0	0	0	0
	702	0	0	0	0	0	0	0	0	0	0	0	0	0	0	0	0	0	0	0	0									702	0	0	0	0	0	0	0	0	0	0	0	0	0	0	0	0	0	0	0
	703	0	0	0	0	0	0	0	0	0	0	0	0	0	0	0	0	0	0	0	0									703	0	0	0	0	0	0	0	0	0	0	0	0	0	0	0	0	0	0	0
	704	0	0	0	0	0	0	0	0	0	0	0	0	0	0	0	0	0	0	0	0									704	0	0	0	0	0	0	0	0	0	0	0	0	0	0	0	0	0	0	0
	705	0	0	0	0	0	0	0	0	0	0	0	0	0	0	0	0	0	0	0	0									705	0	0	0	0	0	0	0	0	0	0	0	0	0	0	0	0	0	0	0
	706	0	0	0	0	0	0	0	0	0	0	0	0	0	0	0	0	0	0	0	0									706	0	0	0	0	0	0	0	0	0	0	0	0	0	0	0	0	0	0	0
	707	0	0	0	0	0	0	0	0	0	0	0	0	0	0	0	0	0	0	0	0									707	0	0	0	0	0	0	0	0	0	0	0	0	0	0	0	0	0	0	0
	708	0	0	0	0	0	0	0	0	0	0	0	0	0	0	0	0	0	0	0	0									708	0	0	0	0	0	0	0	0	0	0	0	0	0	0	0	0	0	0	0
	709	0	0	0	0	0	0	0	0	0	0	0	0	0	0	0	0	0	0	0	0									709	0	0	0	0	0	0	0	0	0	0	0	0	0	0	0	0	0	0	0
	710	0	0	0	0	0	0	0	0	0	0	0	0	0	0	0	0	0	0	0	0									710	0	0	0	0	0	0	0	0	0	0	0	0	0	0	0	0	0	0	0
	711	0	0	0	0	0	0	0	0	0	0	0	0	0	0	0	0	0	0	0	0									711	0	0	0	0	0	0	0	0	0	0	0	0	0	0	0	0	0	0	0
	712	0	0	0	0	0	0	0	0	0	0	0	0	0	0	0	0	0	0	0	0									712	0	0	0	0	0	0	0	0	0	0	0	0	0	0	0	0	0	0	0
	713	0	0	0	0	0	0	0	0	0	0	0	0	0	0	0	0	0	0	0	0									713	0	0	0	0	0	0	0	0	0	0	0	0	0	0	0	0	0	0	0
	714	0	0	0	0	0	0	0	0	0	0	0	0	0	0	0	0	0	0	0	0									714	0	0	0	0	0	0	0	0	0	0	0	0	0	0	0	0	0	0	0
	715	0	0	0	0	0	0	0	0	0	0	0	0	0	0	0	0	0	0	0	0									715	0	0	0	0	0	0	0	0	0	0	0	0	0	0	0	0	0	0	0
	716	0	0	0	0	0	0	0	0	0	0	0	0	0	0	0	0	0	0	0	0									716	0	0	0	0	0	0	0	0	0	0	0	0	0	0	0	0	0	0	0
	717	0	0	0	0	0	0	0	0	0	0	0	0	0	0	0	0	0	0	0	0									717	0	0	0	0	0	0	0	0	0	0	0	0	0	0	0	0	0	0	0
	718	0	0	0	0	0	0	0	0	0	0	0	0	0	0	0	0	0	0	0	0									718	0	0	0	0	0	0	0	0	0	0	0	0	0	0	0	0	0	0	0
	719	0	0	0	0	0	0	0	0	0	0	0	0	0	0	0	0	0	0	0	0									719	0	0	0	0	0	0	0	0	0	0	0	0	0	0	0	0	0	0	0
	720	0	0	0	0	0	0	0	0	0	0	0	0	0	0	0	0	0	0	0	0									720	0	0	0	0	0	0	0	0	0	0	0	0	0	0	0	0	0	0	0
	721	0	0	0	0	0	0	0	0	0	0	0	0	0	0	0	0	0	0	0	0									721	0	0	0	0	0	0	0	0	0	0	0	0	0	0	0	0	0	0	0
	722	0	0	0	0	0	0	0	0	0	0	0	0	0	0	0	0	0	0	0	0									722	0	0	0	0	0	0	0	0	0	0	0	0	0	0	0	0	0	0	0
	723	0	0	0	0	0	0	0	0	0	0	0	0	0	0	0	0	0	0	0	0									723	0	0	0	0	0	0	0	0	0	0	0	0	0	0	0	0	0	0	0
	724	0	0	0	0	0	0	0	0	0	0	0	0	0	0	0	0	0	0	0	0									724	0	0	0	0	0	0	0	0	0	0	0	0	0	0	0	0	0	0	0
	725	0	0	0	0	0	0	0	0	0	0	0	0	0	0	0	0	0	0	0	0									725	0	0	0	0	0	0	0	0	0	0	0	0	0	0	0	0	0	0	0
	726	0	0	0	0	0	0	0	0	0	0	0	0	0	0	0	0	0	0	0	0									726	0	0	0	0	0	0	0	0	0	0	0	0	0	0	0	0	0	0	0
	727	0	0	0	0	0	0	0	0	0	0	0	0	0	0	0	0	0	0	0	0									727	0	0	0	0	0	0	0	0	0	0	0	0	0	0	0	0	0	0	0
	728	0	0	0	0	0	0	0	0	0	0	0	0	0	0	0	0	0	0	0	0									728	0	0	0	0	0	0	0	0	0	0	0	0	0	0	0	0	0	0	0
	729	0	0	0	0	0	0	0	0	0	0	0	0	0	0	0	0	0	0	0	0									729	0	0	0	0	0	0	0	0	0	0	0	0	0	0	0	0	0	0	0
	730	0	0	0	0	0	0	0	0	0	0	0	0	0	0	0	0	0	0	0	0									730	0	0	0	0	0	0	0	0	0	0	0	0	0	0	0	0	0	0	0
	731	0	0	0	0	0	0	0	0	0	0	0	0	0	0	0	0	0	0	0	0									731	0	0	0	0	0	0	0	0	0	0	0	0	0	0	0	0	0	0	0
	732	0	0	0	0	0	0	0	0	0	0	0	0	0	0	0	0	0	0	0	0									732	0	0	0	0	0	0	0	0	0	0	0	0	0	0	0	0	0	0	0
	733	0	0	0	0	0	0	0	0	0	0	0	0	0	0	0	0	0	0	0	0									733	0	0	0	0	0	0	0	0	0	0	0	0	0	0	0	0	0	0	0
	734	0	0	0	0	0	0	0	0	0	0	0	0	0	0	0	0	0	0	0	0									734	0	0	0	0	0	0	0	0	0	0	0	0	0	0	0	0	0	0	0
	735	0	0	0	0	0	0	0	0	0	0	0	0	0	0	0	0	0	0	0	0									735	0	0	0	0	0	0	0	0	0	0	0	0	0	0	0	0	0	0	0
	736	0	0	0	0	0	0	0	0	0	0	0	0	0	0	0	0	0	0	0	0									736	0	0	0	0	0	0	0	0	0	0	0	0	0	0	0	0	0	0	0
	737	0	0	0	0	0	0	0	0	0	0	0	0	0	0	0	0	0	0	0	0									737	0	0	0	0	0	0	0	0	0	0	0	0	0	0	0	0	0	0	0
	738	0	0	0	0	0	0	0	0	0	0	0	0	0	0	0	0	0	0	0	0									738	0	0	0	0	0	0	0	0	0	0	0	0	0	0	0	0	0	0	0
	739	0	0	0	0	0	0	0	0	0	0	0	0	0	0	0	0	0	0	0	0									739	0	0	0	0	0	0	0	0	0	0	0	0	0	0	0	0	0	0	0
	740	0	0	0	0	0	0	0	0	0	0	0	0	0	0	0	0	0	0	0	0									740	0	0	0	0	0	0	0	0	0	0	0	0	0	0	0	0	0	0	0
	741	0	0	0	0	0	0	0	0	0	0	0	0	0	0	0	0	0	0	0	0									741	0	0	0	0	0	0	0	0	0	0	0	0	0	0	0	0	0	0	0
	742	0	0	0	0	0	0	0	0	0	0	0	0	0	0	0	0	0	0	0	0									742	0	0	0	0	0	0	0	0	0	0	0	0	0	0	0	0	0	0	0
	743	0	0	0	0	0	0	0	0	0	0	0	0	0	0	0	0	0	0	0	0									743	0	0	0	0	0	0	0	0	0	0	0	0	0	0	0	0	0	0	0
	744	0	0	0	0	0	0	0	0	0	0	0	0	0	0	0	0	0	0	0	0									744	0	0	0	0	0	0	0	0	0	0	0	0	0	0	0	0	0	0	0
	745	0	0	0	0	0	0	0	0	0	0	0	0	0	0	0	0	0	0	0	0									745	0	0	0	0	0	0	0	0	0	0	0	0	0	0	0	0	0	0	0
	746	0	0	0	0	0	0	0	0	0	0	0	0	0	0	0	0	0	0	0	0									746	0	0	0	0	0	0	0	0	0	0	0	0	0	0	0	0	0	0	0
	747	0	0	0	0	0	0	0	0	0	0	0	0	0	0	0	0	0	0	0	0									747	0	0	0	0	0	0	0	0	0	0	0	0	0	0	0	0	0	0	0
	748	0	0	0	0	0	0	0	0	0	0	0	0	0	0	0	0	0	0	0	0									748	0	0	0	0	0	0	0	0	0	0	0	0	0	0	0	0	0	0	0
	749	0	0	0	0	0	0	0	0	0	0	0	0	0	0	0	0	0	0	0	0									749	0	0	0	0	0	0	0	0	0	0	0	0	0	0	0	0	0	0	0
	750	0	0	0	0	0	0	0	0	0	0	0	0	0	0	0	0	0	0	0	0									750	0	0	0	0	0	0	0	0	0	0	0	0	0	0	0	0	0	0	0
	751	0	0	0	0	0	0	0	0	0	0	0	0	0	0	0	0	0	0	0	0									751	0	0	0	0	0	0	0	0	0	0	0	0	0	0	0	0	0	0	0
	752	0	0	0	0	0	0	0	0	0	0	0	0	0	0	0	0	0	0	0	0									752	0	0	0	0	0	0	0	0	0	0	0	0	0	0	0	0	0	0	0
	753	0	0	0	0	0	0	0	0	0	0	0	0	0	0	0	0	0	0	0	0									753	0	0	0	0	0	0	0	0	0	0	0	0	0	0	0	0	0	0	0
	754	0	0	0	0	0	0	0	0	0	0	0	0	0	0	0	0	0	0	0	0									754	0	0	0	0	0	0	0	0	0	0	0	0	0	0	0	0	0	0	0
	755	0	0	0	0	0	0	0	0	0	0	0	0	0	0	0	0	0	0	0	0									755	0	0	0	0	0	0	0	0	0	0	0	0	0	0	0	0	0	0	0
	756	0	0	0	0	0	0	0	0	0	0	0	0	0	0	0	0	0	0	0	0									756	0	0	0	0	0	0	0	0	0	0	0	0	0	0	0	0	0	0	0
	757	0	0	0	0	0	0	0	0	0	0	0	0	0	0	0	0	0	0	0	0									757	0	0	0	0	0	0	0	0	0	0	0	0	0	0	0	0	0	0	0
	758	0	0	0	0	0	0	0	0	0	0	0	0	0	0	0	0	0	0	0	0									758	0	0	0	0	0	0	0	0	0	0	0	0	0	0	0	0	0	0	0
	759	0	0	0	0	0	0	0	0	0	0	0	0	0	0	0	0	0	0	0	0									759	0	0	0	0	0	0	0	0	0	0	0	0	0	0	0	0	0	0	0
	760	0	0	0	0	0	0	0	0	0	0	0	0	0	0	0	0	0	0	0	0									760	0	0	0	0	0	0	0	0	0	0	0	0	0	0	0	0	0	0	0
	761	0	0	0	0	0	0	0	0	0	0	0	0	0	0	0	0	0	0	0	0									761	0	0	0	0	0	0	0	0	0	0	0	0	0	0	0	0	0	0	0
	762	0	0	0	0	0	0	0	0	0	0	0	0	0	0	0	0	0	0	0	0									762	0	0	0	0	0	0	0	0	0	0	0	0	0	0	0	0	0	0	0
	763	0	0	0	0	0	0	0	0	0	0	0	0	0	0	0	0	0	0	0	0									763	0	0	0	0	0	0	0	0	0	0	0	0	0	0	0	0	0	0	0
	764	0	0	0	0	0	0	0	0	0	0	0	0	0	0	0	0	0	0	0	0									764	0	0	0	0	0	0	0	0	0	0	0	0	0	0	0	0	0	0	0
	765	0	0	0	0	0	0	0	0	0	0	0	0	0	0	0	0	0	0	0	0									765	0	0	0	0	0	0	0	0	0	0	0	0	0	0	0	0	0	0	0
	766	0	0	0	0	0	0	0	0	0	0	0	0	0	0	0	0	0	0	0	0									766	0	0	0	0	0	0	0	0	0	0	0	0	0	0	0	0	0	0	0
	767	0	0	0	0	0	0	0	0	0	0	0	0	0	0	0	0	0	0	0	0									767	0	0	0	0	0	0	0	0	0	0	0	0	0	0	0	0	0	0	0
	768	0	0	0	0	0	0	0	0	0	0	0	0	0	0	0	0	0	0	0	0									768	0	0	0	0	0	0	0	0	0	0	0	0	0	0	0	0	0	0	0
	769	0	0	0	0	0	0	0	0	0	0	0	0	0	0	0	0	0	0	0	0									769	0	0	0	0	0	0	0	0	0	0	0	0	0	0	0	0	0	0	0
	770	0	0	0	0	0	0	0	0	0	0	0	0	0	0	0	0	0	0	0	0									770	0	0	0	0	0	0	0	0	0	0	0	0	0	0	0	0	0	0	0
	771	0	0	0	0	0	0	0	0	0	0	0	0	0	0	0	0	0	0	0	0									771	0	0	0	0	0	0	0	0	0	0	0	0	0	0	0	0	0	0	0
	772	0	0	0	0	0	0	0	0	0	0	0	0	0	0	0	0	0	0	0	0									772	0	0	0	0	0	0	0	0	0	0	0	0	0	0	0	0	0	0	0
	773	0	0	0	0	0	0	0	0	0	0	0	0	0	0	0	0	0	0	0	0									773	0	0	0	0	0	0	0	0	0	0	0	0	0	0	0	0	0	0	0
	774	0	0	0	0	0	0	0	0	0	0	0	0	0	0	0	0	0	0	0	0									774	0	0	0	0	0	0	0	0	0	0	0	0	0	0	0	0	0	0	0
	775	0	0	0	0	0	0	0	0	0	0	0	0	0	0	0	0	0	0	0	0									775	0	0	0	0	0	0	0	0	0	0	0	0	0	0	0	0	0	0	0
	776	0	0	0	0	0	0	0	0	0	0	0	0	0	0	0	0	0	0	0	0									776	0	0	0	0	0	0	0	0	0	0	0	0	0	0	0	0	0	0	0
	777	0	0	0	0	0	0	0	0	0	0	0	0	0	0	0	0	0	0	0	0									777	0	0	0	0	0	0	0	0	0	0	0	0	0	0	0	0	0	0	0
	778	0	0	0	0	0	0	0	0	0	0	0	0	0	0	0	0	0	0	0	0									778	0	0	0	0	0	0	0	0	0	0	0	0	0	0	0	0	0	0	0
	779	0	0	0	0	0	0	0	0	0	0	0	0	0	0	0	0	0	0	0	0									779	0	0	0	0	0	0	0	0	0	0	0	0	0	0	0	0	0	0	0
	780	0	0	0	0	0	0	0	0	0	0	0	0	0	0	0	0	0	0	0	0									780	0	0	0	0	0	0	0	0	0	0	0	0	0	0	0	0	0	0	0
	781	0	0	0	0	0	0	0	0	0	0	0	0	0	0	0	0	0	0	0	0									781	0	0	0	0	0	0	0	0	0	0	0	0	0	0	0	0	0	0	0
	782	0	0	0	0	0	0	0	0	0	0	0	0	0	0	0	0	0	0	0	0									782	0	0	0	0	0	0	0	0	0	0	0	0	0	0	0	0	0	0	0
	783	0	0	0	0	0	0	0	0	0	0	0	0	0	0	0	0	0	0	0	0									783	0	0	0	0	0	0	0	0	0	0	0	0	0	0	0	0	0	0	0
	784	0	0	0	0	0	0	0	0	0	0	0	0	0	0	0	0	0	0	0	0									784	0	0	0	0	0	0	0	0	0	0	0	0	0	0	0	0	0	0	0
	785	0	0	0	0	0	0	0	0	0	0	0	0	0	0	0	0	0	0	0	0									785	0	0	0	0	0	0	0	0	0	0	0	0	0	0	0	0	0	0	0
	786	0	0	0	0	0	0	0	0	0	0	0	0	0	0	0	0	0	0	0	0									786	0	0	0	0	0	0	0	0	0	0	0	0	0	0	0	0	0	0	0
	787	0	0	0	0	0	0	0	0	0	0	0	0	0	0	0	0	0	0	0	0									787	0	0	0	0	0	0	0	0	0	0	0	0	0	0	0	0	0	0	0
	788	0	0	0	0	0	0	0	0	0	0	0	0	0	0	0	0	0	0	0	0									788	0	0	0	0	0	0	0	0	0	0	0	0	0	0	0	0	0	0	0
	789	0	0	0	0	0	0	0	0	0	0	0	0	0	0	0	0	0	0	0	0									789	0	0	0	0	0	0	0	0	0	0	0	0	0	0	0	0	0	0	0
	790	0	0	0	0	0	0	0	0	0	0	0	0	0	0	0	0	0	0	0	0									790	0	0	0	0	0	0	0	0	0	0	0	0	0	0	0	0	0	0	0
	791	0	0	0	0	0	0	0	0	0	0	0	0	0	0	0	0	0	0	0	0									791	0	0	0	0	0	0	0	0	0	0	0	0	0	0	0	0	0	0	0
	792	0	0	0	0	0	0	0	0	0	0	0	0	0	0	0	0	0	0	0	0									792	0	0	0	0	0	0	0	0	0	0	0	0	0	0	0	0	0	0	0
	793	0	0	0	0	0	0	0	0	0	0	0	0	0	0	0	0	0	0	0	0									793	0	0	0	0	0	0	0	0	0	0	0	0	0	0	0	0	0	0	0
	794	0	0	0	0	0	0	0	0	0	0	0	0	0	0	0	0	0	0	0	0									794	0	0	0	0	0	0	0	0	0	0	0	0	0	0	0	0	0	0	0
	795	0	0	0	0	0	0	0	0	0	0	0	0	0	0	0	0	0	0	0	0									795	0	0	0	0	0	0	0	0	0	0	0	0	0	0	0	0	0	0	0
	796	0	0	0	0	0	0	0	0	0	0	0	0	0	0	0	0	0	0	0	0									796	0	0	0	0	0	0	0	0	0	0	0	0	0	0	0	0	0	0	0
	797	0	0	0	0	0	0	0	0	0	0	0	0	0	0	0	0	0	0	0	0									797	0	0	0	0	0	0	0	0	0	0	0	0	0	0	0	0	0	0	0
	798	0	0	0	0	0	0	0	0	0	0	0	0	0	0	0	0	0	0	0	0									798	0	0	0	0	0	0	0	0	0	0	0	0	0	0	0	0	0	0	0
	799	0	0	0	0	0	0	0	0	0	0	0	0	0	0	0	0	0	0	0	0									799	0	0	0	0	0	0	0	0	0	0	0	0	0	0	0	0	0	0	0
	800	0	0	0	0	0	0	0	0	0	0	0	0	0	0	0	0	0	0	0	0									800	0	0	0	0	0	0	0	0	0	0	0	0	0	0	0	0	0	0	0
	801	0	0	0	0	0	0	0	0	0	0	0	0	0	0	0	0	0	0	0	0									801	0	0	0	0	0	0	0	0	0	0	0	0	0	0	0	0	0	0	0
	802	0	0	0	0	0	0	0	0	0	0	0	0	0	0	0	0	0	0	0	0									802	0	0	0	0	0	0	0	0	0	0	0	0	0	0	0	0	0	0	0
	803	0	0	0	0	0	0	0	0	0	0	0	0	0	0	0	0	0	0	0	0									803	0	0	0	0	0	0	0	0	0	0	0	0	0	0	0	0	0	0	0
	804	0	0	0	0	0	0	0	0	0	0	0	0	0	0	0	0	0	0	0	0									804	0	0	0	0	0	0	0	0	0	0	0	0	0	0	0	0	0	0	0
	805	0	0	0	0	0	0	0	0	0	0	0	0	0	0	0	0	0	0	0	0									805	0	0	0	0	0	0	0	0	0	0	0	0	0	0	0	0	0	0	0
	806	0	0	0	0	0	0	0	0	0	0	0	0	0	0	0	0	0	0	0	0									806	0	0	0	0	0	0	0	0	0	0	0	0	0	0	0	0	0	0	0
	807	0	0	0	0	0	0	0	0	0	0	0	0	0	0	0	0	0	0	0	0									807	0	0	0	0	0	0	0	0	0	0	0	0	0	0	0	0	0	0	0
	808	0	0	0	0	0	0	0	0	0	0	0	0	0	0	0	0	0	0	0	0									808	0	0	0	0	0	0	0	0	0	0	0	0	0	0	0	0	0	0	0
	809	0	0	0	0	0	0	0	0	0	0	0	0	0	0	0	0	0	0	0	0									809	0	0	0	0	0	0	0	0	0	0	0	0	0	0	0	0	0	0	0
	810	0	0	0	0	0	0	0	0	0	0	0	0	0	0	0	0	0	0	0	0									810	0	0	0	0	0	0	0	0	0	0	0	0	0	0	0	0	0	0	0
	811	0	0	0	0	0	0	0	0	0	0	0	0	0	0	0	0	0	0	0	0									811	0	0	0	0	0	0	0	0	0	0	0	0	0	0	0	0	0	0	0
	812	0	0	0	0	0	0	0	0	0	0	0	0	0	0	0	0	0	0	0	0									812	0	0	0	0	0	0	0	0	0	0	0	0	0	0	0	0	0	0	0
	813	0	0	0	0	0	0	0	0	0	0	0	0	0	0	0	0	0	0	0	0									813	0	0	0	0	0	0	0	0	0	0	0	0	0	0	0	0	0	0	0
	814	0	0	0	0	0	0	0	0	0	0	0	0	0	0	0	0	0	0	0	0									814	0	0	0	0	0	0	0	0	0	0	0	0	0	0	0	0	0	0	0
	815	0	0	0	0	0	0	0	0	0	0	0	0	0	0	0	0	0	0	0	0									815	0	0	0	0	0	0	0	0	0	0	0	0	0	0	0	0	0	0	0
	816	0	0	0	0	0	0	0	0	0	0	0	0	0	0	0	0	0	0	0	0									816	0	0	0	0	0	0	0	0	0	0	0	0	0	0	0	0	0	0	0
	817	0	0	0	0	0	0	0	0	0	0	0	0	0	0	0	0	0	0	0	0									817	0	0	0	0	0	0	0	0	0	0	0	0	0	0	0	0	0	0	0
	818	0	0	0	0	0	0	0	0	0	0	0	0	0	0	0	0	0	0	0	0									818	0	0	0	0	0	0	0	0	0	0	0	0	0	0	0	0	0	0	0
	819	0	0	0	0	0	0	0	0	0	0	0	0	0	0	0	0	0	0	0	0									819	0	0	0	0	0	0	0	0	0	0	0	0	0	0	0	0	0	0	0
	820	0	0	0	0	0	0	0	0	0	0	0	0	0	0	0	0	0	0	0	0									820	0	0	0	0	0	0	0	0	0	0	0	0	0	0	0	0	0	0	0
	821	0	0	0	0	0	0	0	0	0	0	0	0	0	0	0	0	0	0	0	0									821	0	0	0	0	0	0	0	0	0	0	0	0	0	0	0	0	0	0	0
	822	0	0	0	0	0	0	0	0	0	0	0	0	0	0	0	0	0	0	0	0									822	0	0	0	0	0	0	0	0	0	0	0	0	0	0	0	0	0	0	0
	823	0	0	0	0	0	0	0	0	0	0	0	0	0	0	0	0	0	0	0	0									823	0	0	0	0	0	0	0	0	0	0	0	0	0	0	0	0	0	0	0
	824	0	0	0	0	0	0	0	0	0	0	0	0	0	0	0	0	0	0	0	0									824	0	0	0	0	0	0	0	0	0	0	0	0	0	0	0	0	0	0	0
	825	0	0	0	0	0	0	0	0	0	0	0	0	0	0	0	0	0	0	0	0									825	0	0	0	0	0	0	0	0	0	0	0	0	0	0	0	0	0	0	0
	826	0	0	0	0	0	0	0	0	0	0	0	0	0	0	0	0	0	0	0	0									826	0	0	0	0	0	0	0	0	0	0	0	0	0	0	0	0	0	0	0
	827	0	0	0	0	0	0	0	0	0	0	0	0	0	0	0	0	0	0	0	0									827	0	0	0	0	0	0	0	0	0	0	0	0	0	0	0	0	0	0	0
	828	0	0	0	0	0	0	0	0	0	0	0	0	0	0	0	0	0	0	0	0									828	0	0	0	0	0	0	0	0	0	0	0	0	0	0	0	0	0	0	0
	829	0	0	0	0	0	0	0	0	0	0	0	0	0	0	0	0	0	0	0	0									829	0	0	0	0	0	0	0	0	0	0	0	0	0	0	0	0	0	0	0
	830	0	0	0	0	0	0	0	0	0	0	0	0	0	0	0	0	0	0	0	0									830	0	0	0	0	0	0	0	0	0	0	0	0	0	0	0	0	0	0	0
	831	0	0	0	0	0	0	0	0	0	0	0	0	0	0	0	0	0	0	0	0									831	0	0	0	0	0	0	0	0	0	0	0	0	0	0	0	0	0	0	0
	832	0	0	0	0	0	0	0	0	0	0	0	0	0	0	0	0	0	0	0	0									832	0	0	0	0	0	0	0	0	0	0	0	0	0	0	0	0	0	0	0
	833	0	0	0	0	0	0	0	0	0	0	0	0	0	0	0	0	0	0	0	0									833	0	0	0	0	0	0	0	0	0	0	0	0	0	0	0	0	0	0	0
	834	0	0	0	0	0	0	0	0	0	0	0	0	0	0	0	0	0	0	0	0									834	0	0	0	0	0	0	0	0	0	0	0	0	0	0	0	0	0	0	0
	835	0	0	0	0	0	0	0	0	0	0	0	0	0	0	0	0	0	0	0	0									835	0	0	0	0	0	0	0	0	0	0	0	0	0	0	0	0	0	0	0
	836	0	0	0	0	0	0	0	0	0	0	0	0	0	0	0	0	0	0	0	0									836	0	0	0	0	0	0	0	0	0	0	0	0	0	0	0	0	0	0	0
	837	0	0	0	0	0	0	0	0	0	0	0	0	0	0	0	0	0	0	0	0									837	0	0	0	0	0	0	0	0	0	0	0	0	0	0	0	0	0	0	0
	838	0	0	0	0	0	0	0	0	0	0	0	0	0	0	0	0	0	0	0	0									838	0	0	0	0	0	0	0	0	0	0	0	0	0	0	0	0	0	0	0
	839	0	0	0	0	0	0	0	0	0	0	0	0	0	0	0	0	0	0	0	0									839	0	0	0	0	0	0	0	0	0	0	0	0	0	0	0	0	0	0	0
	840	0	0	0	0	0	0	0	0	0	0	0	0	0	0	0	0	0	0	0	0									840	0	0	0	0	0	0	0	0	0	0	0	0	0	0	0	0	0	0	0
	841	0	0	0	0	0	0	0	0	0	0	0	0	0	0	0	0	0	0	0	0									841	0	0	0	0	0	0	0	0	0	0	0	0	0	0	0	0	0	0	0
	842	0	0	0	0	0	0	0	0	0	0	0	0	0	0	0	0	0	0	0	0									842	0	0	0	0	0	0	0	0	0	0	0	0	0	0	0	0	0	0	0
	843	0	0	0	0	0	0	0	0	0	0	0	0	0	0	0	0	0	0	0	0									843	0	0	0	0	0	0	0	0	0	0	0	0	0	0	0	0	0	0	0
	844	0	0	0	0	0	0	0	0	0	0	0	0	0	0	0	0	0	0	0	0									844	0	0	0	0	0	0	0	0	0	0	0	0	0	0	0	0	0	0	0
	845	0	0	0	0	0	0	0	0	0	0	0	0	0	0	0	0	0	0	0	0									845	0	0	0	0	0	0	0	0	0	0	0	0	0	0	0	0	0	0	0
	846	0	0	0	0	0	0	0	0	0	0	0	0	0	0	0	0	0	0	0	0									846	0	0	0	0	0	0	0	0	0	0	0	0	0	0	0	0	0	0	0
	847	0	0	0	0	0	0	0	0	0	0	0	0	0	0	0	0	0	0	0	0									847	0	0	0	0	0	0	0	0	0	0	0	0	0	0	0	0	0	0	0
	848	0	0	0	0	0	0	0	0	0	0	0	0	0	0	0	0	0	0	0	0									848	0	0	0	0	0	0	0	0	0	0	0	0	0	0	0	0	0	0	0
	849	0	0	0	0	0	0	0	0	0	0	0	0	0	0	0	0	0	0	0	0									849	0	0	0	0	0	0	0	0	0	0	0	0	0	0	0	0	0	0	0
	850	0	0	0	0	0	0	0	0	0	0	0	0	0	0	0	0	0	0	0	0									850	0	0	0	0	0	0	0	0	0	0	0	0	0	0	0	0	0	0	0
	851	0	0	0	0	0	0	0	0	0	0	0	0	0	0	0	0	0	0	0	0									851	0	0	0	0	0	0	0	0	0	0	0	0	0	0	0	0	0	0	0
	852	0	0	0	0	0	0	0	0	0	0	0	0	0	0	0	0	0	0	0	0									852	0	0	0	0	0	0	0	0	0	0	0	0	0	0	0	0	0	0	0
	853	0	0	0	0	0	0	0	0	0	0	0	0	0	0	0	0	0	0	0	0									853	0	0	0	0	0	0	0	0	0	0	0	0	0	0	0	0	0	0	0
	854	0	0	0	0	0	0	0	0	0	0	0	0	0	0	0	0	0	0	0	0									854	0	0	0	0	0	0	0	0	0	0	0	0	0	0	0	0	0	0	0
	855	0	0	0	0	0	0	0	0	0	0	0	0	0	0	0	0	0	0	0	0									855	0	0	0	0	0	0	0	0	0	0	0	0	0	0	0	0	0	0	0
	856	0	0	0	0	0	0	0	0	0	0	0	0	0	0	0	0	0	0	0	0									856	0	0	0	0	0	0	0	0	0	0	0	0	0	0	0	0	0	0	0
	857	0	0	0	0	0	0	0	0	0	0	0	0	0	0	0	0	0	0	0	0									857	0	0	0	0	0	0	0	0	0	0	0	0	0	0	0	0	0	0	0
	858	0	0	0	0	0	0	0	0	0	0	0	0	0	0	0	0	0	0	0	0									858	0	0	0	0	0	0	0	0	0	0	0	0	0	0	0	0	0	0	0
	859	0	0	0	0	0	0	0	0	0	0	0	0	0	0	0	0	0	0	0	0									859	0	0	0	0	0	0	0	0	0	0	0	0	0	0	0	0	0	0	0
	860	0	0	0	0	0	0	0	0	0	0	0	0	0	0	0	0	0	0	0	0									860	0	0	0	0	0	0	0	0	0	0	0	0	0	0	0	0	0	0	0
	861	0	0	0	0	0	0	0	0	0	0	0	0	0	0	0	0	0	0	0	0									861	0	0	0	0	0	0	0	0	0	0	0	0	0	0	0	0	0	0	0
	862	0	0	0	0	0	0	0	0	0	0	0	0	0	0	0	0	0	0	0	0									862	0	0	0	0	0	0	0	0	0	0	0	0	0	0	0	0	0	0	0
	863	0	0	0	0	0	0	0	0	0	0	0	0	0	0	0	0	0	0	0	0									863	0	0	0	0	0	0	0	0	0	0	0	0	0	0	0	0	0	0	0
	864	0	0	0	0	0	0	0	0	0	0	0	0	0	0	0	0	0	0	0	0									864	0	0	0	0	0	0	0	0	0	0	0	0	0	0	0	0	0	0	0
	865	0	0	0	0	0	0	0	0	0	0	0	0	0	0	0	0	0	0	0	0									865	0	0	0	0	0	0	0	0	0	0	0	0	0	0	0	0	0	0	0
	866	0	0	0	0	0	0	0	0	0	0	0	0	0	0	0	0	0	0	0	0									866	0	0	0	0	0	0	0	0	0	0	0	0	0	0	0	0	0	0	0
	867	0	0	0	0	0	0	0	0	0	0	0	0	0	0	0	0	0	0	0	0									867	0	0	0	0	0	0	0	0	0	0	0	0	0	0	0	0	0	0	0
	868	0	0	0	0	0	0	0	0	0	0	0	0	0	0	0	0	0	0	0	0									868	0	0	0	0	0	0	0	0	0	0	0	0	0	0	0	0	0	0	0
	869	0	0	0	0	0	0	0	0	0	0	0	0	0	0	0	0	0	0	0	0									869	0	0	0	0	0	0	0	0	0	0	0	0	0	0	0	0	0	0	0
	870	0	0	0	0	0	0	0	0	0	0	0	0	0	0	0	0	0	0	0	0									870	0	0	0	0	0	0	0	0	0	0	0	0	0	0	0	0	0	0	0
	871	0	0	0	0	0	0	0	0	0	0	0	0	0	0	0	0	0	0	0	0									871	0	0	0	0	0	0	0	0	0	0	0	0	0	0	0	0	0	0	0
	872	0	0	0	0	0	0	0	0	0	0	0	0	0	0	0	0	0	0	0	0									872	0	0	0	0	0	0	0	0	0	0	0	0	0	0	0	0	0	0	0
	873	0	0	0	0	0	0	0	0	0	0	0	0	0	0	0	0	0	0	0	0									873	0	0	0	0	0	0	0	0	0	0	0	0	0	0	0	0	0	0	0
	874	0	0	0	0	0	0	0	0	0	0	0	0	0	0	0	0	0	0	0	0									874	0	0	0	0	0	0	0	0	0	0	0	0	0	0	0	0	0	0	0
	875	0	0	0	0	0	0	0	0	0	0	0	0	0	0	0	0	0	0	0	0									875	0	0	0	0	0	0	0	0	0	0	0	0	0	0	0	0	0	0	0
	876	0	0	0	0	0	0	0	0	0	0	0	0	0	0	0	0	0	0	0	0									876	0	0	0	0	0	0	0	0	0	0	0	0	0	0	0	0	0	0	0
	877	0	0	0	0	0	0	0	0	0	0	0	0	0	0	0	0	0	0	0	0									877	0	0	0	0	0	0	0	0	0	0	0	0	0	0	0	0	0	0	0
	878	0	0	0	0	0	0	0	0	0	0	0	0	0	0	0	0	0	0	0	0									878	0	0	0	0	0	0	0	0	0	0	0	0	0	0	0	0	0	0	0
	879	0	0	0	0	0	0	0	0	0	0	0	0	0	0	0	0	0	0	0	0									879	0	0	0	0	0	0	0	0	0	0	0	0	0	0	0	0	0	0	0
	880	0	0	0	0	0	0	0	0	0	0	0	0	0	0	0	0	0	0	0	0									880	0	0	0	0	0	0	0	0	0	0	0	0	0	0	0	0	0	0	0
	881	0	0	0	0	0	0	0	0	0	0	0	0	0	0	0	0	0	0	0	0									881	0	0	0	0	0	0	0	0	0	0	0	0	0	0	0	0	0	0	0
	882	0	0	0	0	0	0	0	0	0	0	0	0	0	0	0	0	0	0	0	0									882	0	0	0	0	0	0	0	0	0	0	0	0	0	0	0	0	0	0	0
	883	0	0	0	0	0	0	0	0	0	0	0	0	0	0	0	0	0	0	0	0									883	0	0	0	0	0	0	0	0	0	0	0	0	0	0	0	0	0	0	0
	884	0	0	0	0	0	0	0	0	0	0	0	0	0	0	0	0	0	0	0	0									884	0	0	0	0	0	0	0	0	0	0	0	0	0	0	0	0	0	0	0
	885	0	0	0	0	0	0	0	0	0	0	0	0	0	0	0	0	0	0	0	0									885	0	0	0	0	0	0	0	0	0	0	0	0	0	0	0	0	0	0	0
	886	0	0	0	0	0	0	0	0	0	0	0	0	0	0	0	0	0	0	0	0									886	0	0	0	0	0	0	0	0	0	0	0	0	0	0	0	0	0	0	0
	887	0	0	0	0	0	0	0	0	0	0	0	0	0	0	0	0	0	0	0	0									887	0	0	0	0	0	0	0	0	0	0	0	0	0	0	0	0	0	0	0
	888	0	0	0	0	0	0	0	0	0	0	0	0	0	0	0	0	0	0	0	0									888	0	0	0	0	0	0	0	0	0	0	0	0	0	0	0	0	0	0	0
	889	0	0	0	0	0	0	0	0	0	0	0	0	0	0	0	0	0	0	0	0									889	0	0	0	0	0	0	0	0	0	0	0	0	0	0	0	0	0	0	0
	890	0	0	0	0	0	0	0	0	0	0	0	0	0	0	0	0	0	0	0	0									890	0	0	0	0	0	0	0	0	0	0	0	0	0	0	0	0	0	0	0
	891	0	0	0	0	0	0	0	0	0	0	0	0	0	0	0	0	0	0	0	0									891	0	0	0	0	0	0	0	0	0	0	0	0	0	0	0	0	0	0	0
	892	0	0	0	0	0	0	0	0	0	0	0	0	0	0	0	0	0	0	0	0									892	0	0	0	0	0	0	0	0	0	0	0	0	0	0	0	0	0	0	0
	893	0	0	0	0	0	0	0	0	0	0	0	0	0	0	0	0	0	0	0	0									893	0	0	0	0	0	0	0	0	0	0	0	0	0	0	0	0	0	0	0
	894	0	0	0	0	0	0	0	0	0	0	0	0	0	0	0	0	0	0	0	0									894	0	0	0	0	0	0	0	0	0	0	0	0	0	0	0	0	0	0	0
	895	0	0	0	0	0	0	0	0	0	0	0	0	0	0	0	0	0	0	0	0									895	0	0	0	0	0	0	0	0	0	0	0	0	0	0	0	0	0	0	0
	896	0	0	0	0	0	0	0	0	0	0	0	0	0	0	0	0	0	0	0	0									896	0	0	0	0	0	0	0	0	0	0	0	0	0	0	0	0	0	0	0
	897	0	0	0	0	0	0	0	0	0	0	0	0	0	0	0	0	0	0	0	0									897	0	0	0	0	0	0	0	0	0	0	0	0	0	0	0	0	0	0	0
	898	0	0	0	0	0	0	0	0	0	0	0	0	0	0	0	0	0	0	0	0									898	0	0	0	0	0	0	0	0	0	0	0	0	0	0	0	0	0	0	0
	899	0	0	0	0	0	0	0	0	0	0	0	0	0	0	0	0	0	0	0	0									899	0	0	0	0	0	0	0	0	0	0	0	0	0	0	0	0	0	0	0
	900	0	0	0	0	0	0	0	0	0	0	0	0	0	0	0	0	0	0	0	0									900	0	0	0	0	0	0	0	0	0	0	0	0	0	0	0	0	0	0	0
	901	0	0	0	0	0	0	0	0	0	0	0	0	0	0	0	0	0	0	0	0									901	0	0	0	0	0	0	0	0	0	0	0	0	0	0	0	0	0	0	0
	902	0	0	0	0	0	0	0	0	0	0	0	0	0	0	0	0	0	0	0	0									902	0	0	0	0	0	0	0	0	0	0	0	0	0	0	0	0	0	0	0
	903	0	0	0	0	0	0	0	0	0	0	0	0	0	0	0	0	0	0	0	0									903	0	0	0	0	0	0	0	0	0	0	0	0	0	0	0	0	0	0	0
	904	0	0	0	0	0	0	0	0	0	0	0	0	0	0	0	0	0	0	0	0									904	0	0	0	0	0	0	0	0	0	0	0	0	0	0	0	0	0	0	0
	905	0	0	0	0	0	0	0	0	0	0	0	0	0	0	0	0	0	0	0	0									905	0	0	0	0	0	0	0	0	0	0	0	0	0	0	0	0	0	0	0
	906	0	0	0	0	0	0	0	0	0	0	0	0	0	0	0	0	0	0	0	0									906	0	0	0	0	0	0	0	0	0	0	0	0	0	0	0	0	0	0	0
	907	0	0	0	0	0	0	0	0	0	0	0	0	0	0	0	0	0	0	0	0									907	0	0	0	0	0	0	0	0	0	0	0	0	0	0	0	0	0	0	0
	908	0	0	0	0	0	0	0	0	0	0	0	0	0	0	0	0	0	0	0	0									908	0	0	0	0	0	0	0	0	0	0	0	0	0	0	0	0	0	0	0
	909	0	0	0	0	0	0	0	0	0	0	0	0	0	0	0	0	0	0	0	0									909	0	0	0	0	0	0	0	0	0	0	0	0	0	0	0	0	0	0	0
	910	0	0	0	0	0	0	0	0	0	0	0	0	0	0	0	0	0	0	0	0									910	0	0	0	0	0	0	0	0	0	0	0	0	0	0	0	0	0	0	0
	911	0	0	0	0	0	0	0	0	0	0	0	0	0	0	0	0	0	0	0	0									911	0	0	0	0	0	0	0	0	0	0	0	0	0	0	0	0	0	0	0
	912	0	0	0	0	0	0	0	0	0	0	0	0	0	0	0	0	0	0	0	0									912	0	0	0	0	0	0	0	0	0	0	0	0	0	0	0	0	0	0	0
	913	0	0	0	0	0	0	0	0	0	0	0	0	0	0	0	0	0	0	0	0									913	0	0	0	0	0	0	0	0	0	0	0	0	0	0	0	0	0	0	0
	914	0	0	0	0	0	0	0	0	0	0	0	0	0	0	0	0	0	0	0	0									914	0	0	0	0	0	0	0	0	0	0	0	0	0	0	0	0	0	0	0
	915	0	0	0	0	0	0	0	0	0	0	0	0	0	0	0	0	0	0	0	0									915	0	0	0	0	0	0	0	0	0	0	0	0	0	0	0	0	0	0	0
	916	0	0	0	0	0	0	0	0	0	0	0	0	0	0	0	0	0	0	0	0									916	0	0	0	0	0	0	0	0	0	0	0	0	0	0	0	0	0	0	0
	917	0	0	0	0	0	0	0	0	0	0	0	0	0	0	0	0	0	0	0	0									917	0	0	0	0	0	0	0	0	0	0	0	0	0	0	0	0	0	0	0
	918	0	0	0	0	0	0	0	0	0	0	0	0	0	0	0	0	0	0	0	0									918	0	0	0	0	0	0	0	0	0	0	0	0	0	0	0	0	0	0	0
	919	0	0	0	0	0	0	0	0	0	0	0	0	0	0	0	0	0	0	0	0									919	0	0	0	0	0	0	0	0	0	0	0	0	0	0	0	0	0	0	0
	920	0	0	0	0	0	0	0	0	0	0	0	0	0	0	0	0	0	0	0	0									920	0	0	0	0	0	0	0	0	0	0	0	0	0	0	0	0	0	0	0
	921	0	0	0	0	0	0	0	0	0	0	0	0	0	0	0	0	0	0	0	0									921	0	0	0	0	0	0	0	0	0	0	0	0	0	0	0	0	0	0	0
	922	0	0	0	0	0	0	0	0	0	0	0	0	0	0	0	0	0	0	0	0									922	0	0	0	0	0	0	0	0	0	0	0	0	0	0	0	0	0	0	0
	923	0	0	0	0	0	0	0	0	0	0	0	0	0	0	0	0	0	0	0	0									923	0	0	0	0	0	0	0	0	0	0	0	0	0	0	0	0	0	0	0
	924	0	0	0	0	0	0	0	0	0	0	0	0	0	0	0	0	0	0	0	0									924	0	0	0	0	0	0	0	0	0	0	0	0	0	0	0	0	0	0	0
	925	0	0	0	0	0	0	0	0	0	0	0	0	0	0	0	0	0	0	0	0									925	0	0	0	0	0	0	0	0	0	0	0	0	0	0	0	0	0	0	0
	926	0	0	0	0	0	0	0	0	0	0	0	0	0	0	0	0	0	0	0	0									926	0	0	0	0	0	0	0	0	0	0	0	0	0	0	0	0	0	0	0
	927	0	0	0	0	0	0	0	0	0	0	0	0	0	0	0	0	0	0	0	0									927	0	0	0	0	0	0	0	0	0	0	0	0	0	0	0	0	0	0	0
	928	0	0	0	0	0	0	0	0	0	0	0	0	0	0	0	0	0	0	0	0									928	0	0	0	0	0	0	0	0	0	0	0	0	0	0	0	0	0	0	0
	929	0	0	0	0	0	0	0	0	0	0	0	0	0	0	0	0	0	0	0	0									929	0	0	0	0	0	0	0	0	0	0	0	0	0	0	0	0	0	0	0
	930	0	0	0	0	0	0	0	0	0	0	0	0	0	0	0	0	0	0	0	0									930	0	0	0	0	0	0	0	0	0	0	0	0	0	0	0	0	0	0	0
	931	0	0	0	0	0	0	0	0	0	0	0	0	0	0	0	0	0	0	0	0									931	0	0	0	0	0	0	0	0	0	0	0	0	0	0	0	0	0	0	0
	932	0	0	0	0	0	0	0	0	0	0	0	0	0	0	0	0	0	0	0	0									932	0	0	0	0	0	0	0	0	0	0	0	0	0	0	0	0	0	0	0
	933	0	0	0	0	0	0	0	0	0	0	0	0	0	0	0	0	0	0	0	0									933	0	0	0	0	0	0	0	0	0	0	0	0	0	0	0	0	0	0	0
	934	0	0	0	0	0	0	0	0	0	0	0	0	0	0	0	0	0	0	0	0									934	0	0	0	0	0	0	0	0	0	0	0	0	0	0	0	0	0	0	0
	935	0	0	0	0	0	0	0	0	0	0	0	0	0	0	0	0	0	0	0	0									935	0	0	0	0	0	0	0	0	0	0	0	0	0	0	0	0	0	0	0
	936	0	0	0	0	0	0	0	0	0	0	0	0	0	0	0	0	0	0	0	0									936	0	0	0	0	0	0	0	0	0	0	0	0	0	0	0	0	0	0	0
	937	0	0	0	0	0	0	0	0	0	0	0	0	0	0	0	0	0	0	0	0									937	0	0	0	0	0	0	0	0	0	0	0	0	0	0	0	0	0	0	0
	938	0	0	0	0	0	0	0	0	0	0	0	0	0	0	0	0	0	0	0	0									938	0	0	0	0	0	0	0	0	0	0	0	0	0	0	0	0	0	0	0
	939	0	0	0	0	0	0	0	0	0	0	0	0	0	0	0	0	0	0	0	0									939	0	0	0	0	0	0	0	0	0	0	0	0	0	0	0	0	0	0	0
	940	0	0	0	0	0	0	0	0	0	0	0	0	0	0	0	0	0	0	0	0									940	0	0	0	0	0	0	0	0	0	0	0	0	0	0	0	0	0	0	0
	941	0	0	0	0	0	0	0	0	0	0	0	0	0	0	0	0	0	0	0	0									941	0	0	0	0	0	0	0	0	0	0	0	0	0	0	0	0	0	0	0
	942	0	0	0	0	0	0	0	0	0	0	0	0	0	0	0	0	0	0	0	0									942	0	0	0	0	0	0	0	0	0	0	0	0	0	0	0	0	0	0	0
	943	0	0	0	0	0	0	0	0	0	0	0	0	0	0	0	0	0	0	0	0									943	0	0	0	0	0	0	0	0	0	0	0	0	0	0	0	0	0	0	0
	944	0	0	0	0	0	0	0	0	0	0	0	0	0	0	0	0	0	0	0	0									944	0	0	0	0	0	0	0	0	0	0	0	0	0	0	0	0	0	0	0
	945	0	0	0	0	0	0	0	0	0	0	0	0	0	0	0	0	0	0	0	0									945	0	0	0	0	0	0	0	0	0	0	0	0	0	0	0	0	0	0	0
	946	0	0	0	0	0	0	0	0	0	0	0	0	0	0	0	0	0	0	0	0									946	0	0	0	0	0	0	0	0	0	0	0	0	0	0	0	0	0	0	0
	947	0	0	0	0	0	0	0	0	0	0	0	0	0	0	0	0	0	0	0	0									947	0	0	0	0	0	0	0	0	0	0	0	0	0	0	0	0	0	0	0
	948	0	0	0	0	0	0	0	0	0	0	0	0	0	0	0	0	0	0	0	0									948	0	0	0	0	0	0	0	0	0	0	0	0	0	0	0	0	0	0	0
	949	0	0	0	0	0	0	0	0	0	0	0	0	0	0	0	0	0	0	0	0									949	0	0	0	0	0	0	0	0	0	0	0	0	0	0	0	0	0	0	0
	950	0	0	0	0	0	0	0	0	0	0	0	0	0	0	0	0	0	0	0	0									950	0	0	0	0	0	0	0	0	0	0	0	0	0	0	0	0	0	0	0
	951	0	0	0	0	0	0	0	0	0	0	0	0	0	0	0	0	0	0	0	0									951	0	0	0	0	0	0	0	0	0	0	0	0	0	0	0	0	0	0	0
	952	0	0	0	0	0	0	0	0	0	0	0	0	0	0	0	0	0	0	0	0									952	0	0	0	0	0	0	0	0	0	0	0	0	0	0	0	0	0	0	0
	953	0	0	0	0	0	0	0	0	0	0	0	0	0	0	0	0	0	0	0	0									953	0	0	0	0	0	0	0	0	0	0	0	0	0	0	0	0	0	0	0
	954	0	0	0	0	0	0	0	0	0	0	0	0	0	0	0	0	0	0	0	0									954	0	0	0	0	0	0	0	0	0	0	0	0	0	0	0	0	0	0	0
	955	0	0	0	0	0	0	0	0	0	0	0	0	0	0	0	0	0	0	0	0									955	0	0	0	0	0	0	0	0	0	0	0	0	0	0	0	0	0	0	0
	956	0	0	0	0	0	0	0	0	0	0	0	0	0	0	0	0	0	0	0	0									956	0	0	0	0	0	0	0	0	0	0	0	0	0	0	0	0	0	0	0
	957	0	0	0	0	0	0	0	0	0	0	0	0	0	0	0	0	0	0	0	0									957	0	0	0	0	0	0	0	0	0	0	0	0	0	0	0	0	0	0	0
	958	0	0	0	0	0	0	0	0	0	0	0	0	0	0	0	0	0	0	0	0									958	0	0	0	0	0	0	0	0	0	0	0	0	0	0	0	0	0	0	0
	959	0	0	0	0	0	0	0	0	0	0	0	0	0	0	0	0	0	0	0	0									959	0	0	0	0	0	0	0	0	0	0	0	0	0	0	0	0	0	0	0
	960	0	0	0	0	0	0	0	0	0	0	0	0	0	0	0	0	0	0	0	0									960	0	0	0	0	0	0	0	0	0	0	0	0	0	0	0	0	0	0	0
	961	0	0	0	0	0	0	0	0	0	0	0	0	0	0	0	0	0	0	0	0									961	0	0	0	0	0	0	0	0	0	0	0	0	0	0	0	0	0	0	0
	962	0	0	0	0	0	0	0	0	0	0	0	0	0	0	0	0	0	0	0	0									962	0	0	0	0	0	0	0	0	0	0	0	0	0	0	0	0	0	0	0
	963	0	0	0	0	0	0	0	0	0	0	0	0	0	0	0	0	0	0	0	0									963	0	0	0	0	0	0	0	0	0	0	0	0	0	0	0	0	0	0	0
	964	0	0	0	0	0	0	0	0	0	0	0	0	0	0	0	0	0	0	0	0									964	0	0	0	0	0	0	0	0	0	0	0	0	0	0	0	0	0	0	0
	965	0	0	0	0	0	0	0	0	0	0	0	0	0	0	0	0	0	0	0	0									965	0	0	0	0	0	0	0	0	0	0	0	0	0	0	0	0	0	0	0
	966	0	0	0	0	0	0	0	0	0	0	0	0	0	0	0	0	0	0	0	0									966	0	0	0	0	0	0	0	0	0	0	0	0	0	0	0	0	0	0	0
	967	0	0	0	0	0	0	0	0	0	0	0	0	0	0	0	0	0	0	0	0									967	0	0	0	0	0	0	0	0	0	0	0	0	0	0	0	0	0	0	0
	968	0	0	0	0	0	0	0	0	0	0	0	0	0	0	0	0	0	0	0	0									968	0	0	0	0	0	0	0	0	0	0	0	0	0	0	0	0	0	0	0
	969	0	0	0	0	0	0	0	0	0	0	0	0	0	0	0	0	0	0	0	0									969	0	0	0	0	0	0	0	0	0	0	0	0	0	0	0	0	0	0	0
	970	0	0	0	0	0	0	0	0	0	0	0	0	0	0	0	0	0	0	0	0									970	0	0	0	0	0	0	0	0	0	0	0	0	0	0	0	0	0	0	0
	971	0	0	0	0	0	0	0	0	0	0	0	0	0	0	0	0	0	0	0	0									971	0	0	0	0	0	0	0	0	0	0	0	0	0	0	0	0	0	0	0
	972	0	0	0	0	0	0	0	0	0	0	0	0	0	0	0	0	0	0	0	0									972	0	0	0	0	0	0	0	0	0	0	0	0	0	0	0	0	0	0	0
	973	0	0	0	0	0	0	0	0	0	0	0	0	0	0	0	0	0	0	0	0									973	0	0	0	0	0	0	0	0	0	0	0	0	0	0	0	0	0	0	0
	974	0	0	0	0	0	0	0	0	0	0	0	0	0	0	0	0	0	0	0	0									974	0	0	0	0	0	0	0	0	0	0	0	0	0	0	0	0	0	0	0
	975	0	0	0	0	0	0	0	0	0	0	0	0	0	0	0	0	0	0	0	0									975	0	0	0	0	0	0	0	0	0	0	0	0	0	0	0	0	0	0	0
	976	0	0	0	0	0	0	0	0	0	0	0	0	0	0	0	0	0	0	0	0									976	0	0	0	0	0	0	0	0	0	0	0	0	0	0	0	0	0	0	0
	977	0	0	0	0	0	0	0	0	0	0	0	0	0	0	0	0	0	0	0	0									977	0	0	0	0	0	0	0	0	0	0	0	0	0	0	0	0	0	0	0
	978	0	0	0	0	0	0	0	0	0	0	0	0	0	0	0	0	0	0	0	0									978	0	0	0	0	0	0	0	0	0	0	0	0	0	0	0	0	0	0	0
	979	0	0	0	0	0	0	0	0	0	0	0	0	0	0	0	0	0	0	0	0									979	0	0	0	0	0	0	0	0	0	0	0	0	0	0	0	0	0	0	0
	980	0	0	0	0	0	0	0	0	0	0	0	0	0	0	0	0	0	0	0	0									980	0	0	0	0	0	0	0	0	0	0	0	0	0	0	0	0	0	0	0
	981	0	0	0	0	0	0	0	0	0	0	0	0	0	0	0	0	0	0	0	0									981	0	0	0	0	0	0	0	0	0	0	0	0	0	0	0	0	0	0	0
	982	0	0	0	0	0	0	0	0	0	0	0	0	0	0	0	0	0	0	0	0									982	0	0	0	0	0	0	0	0	0	0	0	0	0	0	0	0	0	0	0
	983	0	0	0	0	0	0	0	0	0	0	0	0	0	0	0	0	0	0	0	0									983	0	0	0	0	0	0	0	0	0	0	0	0	0	0	0	0	0	0	0
	984	0	0	0	0	0	0	0	0	0	0	0	0	0	0	0	0	0	0	0	0									984	0	0	0	0	0	0	0	0	0	0	0	0	0	0	0	0	0	0	0
	985	0	0	0	0	0	0	0	0	0	0	0	0	0	0	0	0	0	0	0	0									985	0	0	0	0	0	0	0	0	0	0	0	0	0	0	0	0	0	0	0
	986	0	0	0	0	0	0	0	0	0	0	0	0	0	0	0	0	0	0	0	0									986	0	0	0	0	0	0	0	0	0	0	0	0	0	0	0	0	0	0	0
	987	0	0	0	0	0	0	0	0	0	0	0	0	0	0	0	0	0	0	0	0									987	0	0	0	0	0	0	0	0	0	0	0	0	0	0	0	0	0	0	0
	988	0	0	0	0	0	0	0	0	0	0	0	0	0	0	0	0	0	0	0	0									988	0	0	0	0	0	0	0	0	0	0	0	0	0	0	0	0	0	0	0
	989	0	0	0	0	0	0	0	0	0	0	0	0	0	0	0	0	0	0	0	0									989	0	0	0	0	0	0	0	0	0	0	0	0	0	0	0	0	0	0	0
	990	0	0	0	0	0	0	0	0	0	0	0	0	0	0	0	0	0	0	0	0									990	0	0	0	0	0	0	0	0	0	0	0	0	0	0	0	0	0	0	0
	991	0	0	0	0	0	0	0	0	0	0	0	0	0	0	0	0	0	0	0	0									991	0	0	0	0	0	0	0	0	0	0	0	0	0	0	0	0	0	0	0
	992	0	0	0	0	0	0	0	0	0	0	0	0	0	0	0	0	0	0	0	0									992	0	0	0	0	0	0	0	0	0	0	0	0	0	0	0	0	0	0	0
	993	0	0	0	0	0	0	0	0	0	0	0	0	0	0	0	0	0	0	0	0									993	0	0	0	0	0	0	0	0	0	0	0	0	0	0	0	0	0	0	0
	994	0	0	0	0	0	0	0	0	0	0	0	0	0	0	0	0	0	0	0	0									994	0	0	0	0	0	0	0	0	0	0	0	0	0	0	0	0	0	0	0
	995	0	0	0	0	0	0	0	0	0	0	0	0	0	0	0	0	0	0	0	0									995	0	0	0	0	0	0	0	0	0	0	0	0	0	0	0	0	0	0	0
	996	0	0	0	0	0	0	0	0	0	0	0	0	0	0	0	0	0	0	0	0									996	0	0	0	0	0	0	0	0	0	0	0	0	0	0	0	0	0	0	0
	997	0	0	0	0	0	0	0	0	0	0	0	0	0	0	0	0	0	0	0	0									997	0	0	0	0	0	0	0	0	0	0	0	0	0	0	0	0	0	0	0
	998	0	0	0	0	0	0	0	0	0	0	0	0	0	0	0	0	0	0	0	0									998	0	0	0	0	0	0	0	0	0	0	0	0	0	0	0	0	0	0	0
	999	0	0	0	0	0	0	0	0	0	0	0	0	0	0	0	0	0	0	0	0									999	0	0	0	0	0	0	0	0	0	0	0	0	0	0	0	0	0	0	0
	1000	0	0	0	0	0	0	0	0	0	0	0	0	0	0	0	0	0	0	0	0									1000	0	0	0	0	0	0	0	0	0	0	0	0	0	0	0	0	0	0	0
	1001	0	0	0	0	0	0	0	0	0	0	0	0	0	0	0	0	0	0	0	0									1001	0	0	0	0	0	0	0	0	0	0	0	0	0	0	0	0	0	0	0
	1002	0	0	0	0	0	0	0	0	0	0	0	0	0	0	0	0	0	0	0	0									1002	0	0	0	0	0	0	0	0	0	0	0	0	0	0	0	0	0	0	0
	1003	0	0	0	0	0	0	0	0	0	0	0	0	0	0	0	0	0	0	0	0									1003	0	0	0	0	0	0	0	0	0	0	0	0	0	0	0	0	0	0	0
	1004	0	0	0	0	0	0	0	0	0	0	0	0	0	0	0	0	0	0	0	0									1004	0	0	0	0	0	0	0	0	0	0	0	0	0	0	0	0	0	0	0
	1005	0	0	0	0	0	0	0	0	0	0	0	0	0	0	0	0	0	0	0	0									1005	0	0	0	0	0	0	0	0	0	0	0	0	0	0	0	0	0	0	0
	1006	0	0	0	0	0	0	0	0	0	0	0	0	0	0	0	0	0	0	0	0									1006	0	0	0	0	0	0	0	0	0	0	0	0	0	0	0	0	0	0	0
	1007	0	0	0	0	0	0	0	0	0	0	0	0	0	0	0	0	0	0	0	0									1007	0	0	0	0	0	0	0	0	0	0	0	0	0	0	0	0	0	0	0
	1008	0	0	0	0	0	0	0	0	0	0	0	0	0	0	0	0	0	0	0	0									1008	0	0	0	0	0	0	0	0	0	0	0	0	0	0	0	0	0	0	0
	1009	0	0	0	0	0	0	0	0	0	0	0	0	0	0	0	0	0	0	0	0									1009	0	0	0	0	0	0	0	0	0	0	0	0	0	0	0	0	0	0	0
	1010	0	0	0	0	0	0	0	0	0	0	0	0	0	0	0	0	0	0	0	0									1010	0	0	0	0	0	0	0	0	0	0	0	0	0	0	0	0	0	0	0
	1011	0	0	0	0	0	0	0	0	0	0	0	0	0	0	0	0	0	0	0	0									1011	0	0	0	0	0	0	0	0	0	0	0	0	0	0	0	0	0	0	0
	1012	0	0	0	0	0	0	0	0	0	0	0	0	0	0	0	0	0	0	0	0									1012	0	0	0	0	0	0	0	0	0	0	0	0	0	0	0	0	0	0	0
	1013	0	0	0	0	0	0	0	0	0	0	0	0	0	0	0	0	0	0	0	0									1013	0	0	0	0	0	0	0	0	0	0	0	0	0	0	0	0	0	0	0
	1014	0	0	0	0	0	0	0	0	0	0	0	0	0	0	0	0	0	0	0	0									1014	0	0	0	0	0	0	0	0	0	0	0	0	0	0	0	0	0	0	0
	1015	0	0	0	0	0	0	0	0	0	0	0	0	0	0	0	0	0	0	0	0									1015	0	0	0	0	0	0	0	0	0	0	0	0	0	0	0	0	0	0	0
	1016	0	0	0	0	0	0	0	0	0	0	0	0	0	0	0	0	0	0	0	0									1016	0	0	0	0	0	0	0	0	0	0	0	0	0	0	0	0	0	0	0
	1017	0	0	0	0	0	0	0	0	0	0	0	0	0	0	0	0	0	0	0	0									1017	0	0	0	0	0	0	0	0	0	0	0	0	0	0	0	0	0	0	0
	1018	0	0	0	0	0	0	0	0	0	0	0	0	0	0	0	0	0	0	0	0									1018	0	0	0	0	0	0	0	0	0	0	0	0	0	0	0	0	0	0	0
	1019	0	0	0	0	0	0	0	0	0	0	0	0	0	0	0	0	0	0	0	0									1019	0	0	0	0	0	0	0	0	0	0	0	0	0	0	0	0	0	0	0
	1020	0	0	0	0	0	0	0	0	0	0	0	0	0	0	0	0	0	0	0	0									1020	0	0	0	0	0	0	0	0	0	0	0	0	0	0	0	0	0	0	0
	1021	0	0	0	0	0	0	0	0	0	0	0	0	0	0	0	0	0	0	0	0									1021	0	0	0	0	0	0	0	0	0	0	0	0	0	0	0	0	0	0	0
	1022	0	0	0	0	0	0	0	0	0	0	0	0	0	0	0	0	0	0	0	0									1022	0	0	0	0	0	0	0	0	0	0	0	0	0	0	0	0	0	0	0
	1023	0	0	0	0	0	0	0	0	0	0	0	0	0	0	0	0	0	0	0	0									1023	0	0	0	0	0	0	0	0	0	0	0	0	0	0	0	0	0	0	0
	1024	0	0	0	0	0	0	0	0	0	0	0	0	0	0	0	0	0	0	0	0									1024	0	0	0	0	0	0	0	0	0	0	0	0	0	0	0	0	0	0	0
	1025	0	0	0	0	0	0	0	0	0	0	0	0	0	0	0	0	0	0	0	0									1025	0	0	0	0	0	0	0	0	0	0	0	0	0	0	0	0	0	0	0
	1026	0	0	0	0	0	0	0	0	0	0	0	0	0	0	0	0	0	0	0	0									1026	0	0	0	0	0	0	0	0	0	0	0	0	0	0	0	0	0	0	0
	1027	0	0	0	0	0	0	0	0	0	0	0	0	0	0	0	0	0	0	0	0									1027	0	0	0	0	0	0	0	0	0	0	0	0	0	0	0	0	0	0	0
	1028	0	0	0	0	0	0	0	0	0	0	0	0	0	0	0	0	0	0	0	0									1028	0	0	0	0	0	0	0	0	0	0	0	0	0	0	0	0	0	0	0
	1029	0	0	0	0	0	0	0	0	0	0	0	0	0	0	0	0	0	0	0	0									1029	0	0	0	0	0	0	0	0	0	0	0	0	0	0	0	0	0	0	0
	1030	0	0	0	0	0	0	0	0	0	0	0	0	0	0	0	0	0	0	0	0									1030	0	0	0	0	0	0	0	0	0	0	0	0	0	0	0	0	0	0	0
	1031	0	0	0	0	0	0	0	0	0	0	0	0	0	0	0	0	0	0	0	0									1031	0	0	0	0	0	0	0	0	0	0	0	0	0	0	0	0	0	0	0
	1032	0	0	0	0	0	0	0	0	0	0	0	0	0	0	0	0	0	0	0	0									1032	0	0	0	0	0	0	0	0	0	0	0	0	0	0	0	0	0	0	0
	1033	0	0	0	0	0	0	0	0	0	0	0	0	0	0	0	0	0	0	0	0									1033	0	0	0	0	0	0	0	0	0	0	0	0	0	0	0	0	0	0	0
	1034	0	0	0	0	0	0	0	0	0	0	0	0	0	0	0	0	0	0	0	0									1034	0	0	0	0	0	0	0	0	0	0	0	0	0	0	0	0	0	0	0
	1035	0	0	0	0	0	0	0	0	0	0	0	0	0	0	0	0	0	0	0	0									1035	0	0	0	0	0	0	0	0	0	0	0	0	0	0	0	0	0	0	0
	1036	0	0	0	0	0	0	0	0	0	0	0	0	0	0	0	0	0	0	0	0									1036	0	0	0	0	0	0	0	0	0	0	0	0	0	0	0	0	0	0	0
	1037	0	0	0	0	0	0	0	0	0	0	0	0	0	0	0	0	0	0	0	0									1037	0	0	0	0	0	0	0	0	0	0	0	0	0	0	0	0	0	0	0
	1038	0	0	0	0	0	0	0	0	0	0	0	0	0	0	0	0	0	0	0	0									1038	0	0	0	0	0	0	0	0	0	0	0	0	0	0	0	0	0	0	0
	1039	0	0	0	0	0	0	0	0	0	0	0	0	0	0	0	0	0	0	0	0									1039	0	0	0	0	0	0	0	0	0	0	0	0	0	0	0	0	0	0	0
	1040	0	0	0	0	0	0	0	0	0	0	0	0	0	0	0	0	0	0	0	0									1040	0	0	0	0	0	0	0	0	0	0	0	0	0	0	0	0	0	0	0
	1041	0	0	0	0	0	0	0	0	0	0	0	0	0	0	0	0	0	0	0	0									1041	0	0	0	0	0	0	0	0	0	0	0	0	0	0	0	0	0	0	0
	1042	0	0	0	0	0	0	0	0	0	0	0	0	0	0	0	0	0	0	0	0									1042	0	0	0	0	0	0	0	0	0	0	0	0	0	0	0	0	0	0	0
	1043	0	0	0	0	0	0	0	0	0	0	0	0	0	0	0	0	0	0	0	0									1043	0	0	0	0	0	0	0	0	0	0	0	0	0	0	0	0	0	0	0
	1044	0	0	0	0	0	0	0	0	0	0	0	0	0	0	0	0	0	0	0	0									1044	0	0	0	0	0	0	0	0	0	0	0	0	0	0	0	0	0	0	0
	1045	0	0	0	0	0	0	0	0	0	0	0	0	0	0	0	0	0	0	0	0									1045	0	0	0	0	0	0	0	0	0	0	0	0	0	0	0	0	0	0	0
	1046	0	0	0	0	0	0	0	0	0	0	0	0	0	0	0	0	0	0	0	0									1046	0	0	0	0	0	0	0	0	0	0	0	0	0	0	0	0	0	0	0
	1047	0	0	0	0	0	0	0	0	0	0	0	0	0	0	0	0	0	0	0	0									1047	0	0	0	0	0	0	0	0	0	0	0	0	0	0	0	0	0	0	0
	1048	0	0	0	0	0	0	0	0	0	0	0	0	0	0	0	0	0	0	0	0									1048	0	0	0	0	0	0	0	0	0	0	0	0	0	0	0	0	0	0	0
	1049	0	0	0	0	0	0	0	0	0	0	0	0	0	0	0	0	0	0	0	0									1049	0	0	0	0	0	0	0	0	0	0	0	0	0	0	0	0	0	0	0
	1050	0	0	0	0	0	0	0	0	0	0	0	0	0	0	0	0	0	0	0	0									1050	0	0	0	0	0	0	0	0	0	0	0	0	0	0	0	0	0	0	0
	1051	0	0	0	0	0	0	0	0	0	0	0	0	0	0	0	0	0	0	0	0									1051	0	0	0	0	0	0	0	0	0	0	0	0	0	0	0	0	0	0	0
	1052	0	0	0	0	0	0	0	0	0	0	0	0	0	0	0	0	0	0	0	0									1052	0	0	0	0	0	0	0	0	0	0	0	0	0	0	0	0	0	0	0
	1053	0	0	0	0	0	0	0	0	0	0	0	0	0	0	0	0	0	0	0	0									1053	0	0	0	0	0	0	0	0	0	0	0	0	0	0	0	0	0	0	0
	1054	0	0	0	0	0	0	0	0	0	0	0	0	0	0	0	0	0	0	0	0									1054	0	0	0	0	0	0	0	0	0	0	0	0	0	0	0	0	0	0	0
	1055	0	0	0	0	0	0	0	0	0	0	0	0	0	0	0	0	0	0	0	0									1055	0	0	0	0	0	0	0	0	0	0	0	0	0	0	0	0	0	0	0
	1056	0	0	0	0	0	0	0	0	0	0	0	0	0	0	0	0	0	0	0	0									1056	0	0	0	0	0	0	0	0	0	0	0	0	0	0	0	0	0	0	0
	1057	0	0	0	0	0	0	0	0	0	0	0	0	0	0	0	0	0	0	0	0									1057	0	0	0	0	0	0	0	0	0	0	0	0	0	0	0	0	0	0	0
	1058	0	0	0	0	0	0	0	0	0	0	0	0	0	0	0	0	0	0	0	0									1058	0	0	0	0	0	0	0	0	0	0	0	0	0	0	0	0	0	0	0
	1059	0	0	0	0	0	0	0	0	0	0	0	0	0	0	0	0	0	0	0	0									1059	0	0	0	0	0	0	0	0	0	0	0	0	0	0	0	0	0	0	0
	1060	0	0	0	0	0	0	0	0	0	0	0	0	0	0	0	0	0	0	0	0									1060	0	0	0	0	0	0	0	0	0	0	0	0	0	0	0	0	0	0	0
	1061	0	0	0	0	0	0	0	0	0	0	0	0	0	0	0	0	0	0	0	0									1061	0	0	0	0	0	0	0	0	0	0	0	0	0	0	0	0	0	0	0
	1062	0	0	0	0	0	0	0	0	0	0	0	0	0	0	0	0	0	0	0	0									1062	0	0	0	0	0	0	0	0	0	0	0	0	0	0	0	0	0	0	0
	1063	0	0	0	0	0	0	0	0	0	0	0	0	0	0	0	0	0	0	0	0									1063	0	0	0	0	0	0	0	0	0	0	0	0	0	0	0	0	0	0	0
	1064	0	0	0	0	0	0	0	0	0	0	0	0	0	0	0	0	0	0	0	0									1064	0	0	0	0	0	0	0	0	0	0	0	0	0	0	0	0	0	0	0
	1065	0	0	0	0	0	0	0	0	0	0	0	0	0	0	0	0	0	0	0	0									1065	0	0	0	0	0	0	0	0	0	0	0	0	0	0	0	0	0	0	0
	1066	0	0	0	0	0	0	0	0	0	0	0	0	0	0	0	0	0	0	0	0									1066	0	0	0	0	0	0	0	0	0	0	0	0	0	0	0	0	0	0	0
	1067	0	0	0	0	0	0	0	0	0	0	0	0	0	0	0	0	0	0	0	0									1067	0	0	0	0	0	0	0	0	0	0	0	0	0	0	0	0	0	0	0
	1068	0	0	0	0	0	0	0	0	0	0	0	0	0	0	0	0	0	0	0	0									1068	0	0	0	0	0	0	0	0	0	0	0	0	0	0	0	0	0	0	0
	1069	0	0	0	0	0	0	0	0	0	0	0	0	0	0	0	0	0	0	0	0									1069	0	0	0	0	0	0	0	0	0	0	0	0	0	0	0	0	0	0	0
	1070	0	0	0	0	0	0	0	0	0	0	0	0	0	0	0	0	0	0	0	0
	1071	0	0	0	0	0	0	0	0	0	0	0	0	0	0	0	0	0	0	0	0
	1072	0	0	0	0	0	0	0	0	0	0	0	0	0	0	0	0	0	0	0	0
	1073	0	0	0	0	0	0	0	0	0	0	0	0	0	0	0	0	0	0	0	0
	1074	0	0	0	0	0	0	0	0	0	0	0	0	0	0	0	0	0	0	0	0
	1075	0	0	0	0	0	0	0	0	0	0	0	0	0	0	0	0	0	0	0	0
	1076	0	0	0	0	0	0	0	0	0	0	0	0	0	0	0	0	0	0	0	0
	1077	0	0	0	0	0	0	0	0	0	0	0	0	0	0	0	0	0	0	0	0
	1078	0	0	0	0	0	0	0	0	0	0	0	0	0	0	0	0	0	0	0	0
	1079	0	0	0	0	0	0	0	0	0	0	0	0	0	0	0	0	0	0	0	0
	1080	0	0	0	0	0	0	0	0	0	0	0	0	0	0	0	0	0	0	0	0
	1081	0	0	0	0	0	0	0	0	0	0	0	0	0	0	0	0	0	0	0	0
	1082	0	0	0	0	0	0	0	0	0	0	0	0	0	0	0	0	0	0	0	0
	1083	0	0	0	0	0	0	0	0	0	0	0	0	0	0	0	0	0	0	0	0
	1084	0	0	0	0	0	0	0	0	0	0	0	0	0	0	0	0	0	0	0	0
	1085	0	0	0	0	0	0	0	0	0	0	0	0	0	0	0	0	0	0	0	0
	1086	0	0	0	0	0	0	0	0	0	0	0	0	0	0	0	0	0	0	0	0
	1087	0	0	0	0	0	0	0	0	0	0	0	0	0	0	0	0	0	0	0	0
	1088	0	0	0	0	0	0	0	0	0	0	0	0	0	0	0	0	0	0	0	0
	1089	0	0	0	0	0	0	0	0	0	0	0	0	0	0	0	0	0	0	0	0
	1090	0	0	0	0	0	0	0	0	0	0	0	0	0	0	0	0	0	0	0	0
	1091	0	0	0	0	0	0	0	0	0	0	0	0	0	0	0	0	0	0	0	0
	1092	0	0	0	0	0	0	0	0	0	0	0	0	0	0	0	0	0	0	0	0
	1093	0	0	0	0	0	0	0	0	0	0	0	0	0	0	0	0	0	0	0	0
	1094	0	0	0	0	0	0	0	0	0	0	0	0	0	0	0	0	0	0	0	0
	1095	0	0	0	0	0	0	0	0	0	0	0	0	0	0	0	0	0	0	0	0
	1096	0	0	0	0	0	0	0	0	0	0	0	0	0	0	0	0	0	0	0	0
	1097	0	0	0	0	0	0	0	0	0	0	0	0	0	0	0	0	0	0	0	0
	1098	0	0	0	0	0	0	0	0	0	0	0	0	0	0	0	0	0	0	0	0
	1099	0	0	0	0	0	0	0	0	0	0	0	0	0	0	0	0	0	0	0	0
	1100	0	0	0	0	0	0	0	0	0	0	0	0	0	0	0	0	0	0	0	0
	1101	0	0	0	0	0	0	0	0	0	0	0	0	0	0	0	0	0	0	0	0
	1102	0	0	0	0	0	0	0	0	0	0	0	0	0	0	0	0	0	0	0	0
	1103	0	0	0	0	0	0	0	0	0	0	0	0	0	0	0	0	0	0	0	0
	1104	0	0	0	0	0	0	0	0	0	0	0	0	0	0	0	0	0	0	0	0
	1105	0	0	0	0	0	0	0	0	0	0	0	0	0	0	0	0	0	0	0	0
	1106	0	0	0	0	0	0	0	0	0	0	0	0	0	0	0	0	0	0	0	0
	1107	0	0	0	0	0	0	0	0	0	0	0	0	0	0	0	0	0	0	0	0
	1108	0	0	0	0	0	0	0	0	0	0	0	0	0	0	0	0	0	0	0	0
	1109	0	0	0	0	0	0	0	0	0	0	0	0	0	0	0	0	0	0	0	0
	1110	0	0	0	0	0	0	0	0	0	0	0	0	0	0	0	0	0	0	0	0
	1111	0	0	0	0	0	0	0	0	0	0	0	0	0	0	0	0	0	0	0	0
	1112	0	0	0	0	0	0	0	0	0	0	0	0	0	0	0	0	0	0	0	0
	1113	0	0	0	0	0	0	0	0	0	0	0	0	0	0	0	0	0	0	0	0
	1114	0	0	0	0	0	0	0	0	0	0	0	0	0	0	0	0	0	0	0	0
	1115	0	0	0	0	0	0	0	0	0	0	0	0	0	0	0	0	0	0	0	0
	1116	0	0	0	0	0	0	0	0	0	0	0	0	0	0	0	0	0	0	0	0
	1117	0	0	0	0	0	0	0	0	0	0	0	0	0	0	0	0	0	0	0	0
	1118	0	0	0	0	0	0	0	0	0	0	0	0	0	0	0	0	0	0	0	0
	1119	0	0	0	0	0	0	0	0	0	0	0	0	0	0	0	0	0	0	0	0
	1120	0	0	0	0	0	0	0	0	0	0	0	0	0	0	0	0	0	0	0	0
	1121	0	0	0	0	0	0	0	0	0	0	0	0	0	0	0	0	0	0	0	0
	1122	0	0	0	0	0	0	0	0	0	0	0	0	0	0	0	0	0	0	0	0
	1123	0	0	0	0	0	0	0	0	0	0	0	0	0	0	0	0	0	0	0	0
	1124	0	0	0	0	0	0	0	0	0	0	0	0	0	0	0	0	0	0	0	0
	1125	0	0	0	0	0	0	0	0	0	0	0	0	0	0	0	0	0	0	0	0
	1126	0	0	0	0	0	0	0	0	0	0	0	0	0	0	0	0	0	0	0	0
	1127	0	0	0	0	0	0	0	0	0	0	0	0	0	0	0	0	0	0	0	0
	1128	0	0	0	0	0	0	0	0	0	0	0	0	0	0	0	0	0	0	0	0
	1129	0	0	0	0	0	0	0	0	0	0	0	0	0	0	0	0	0	0	0	0
	1130	0	0	0	0	0	0	0	0	0	0	0	0	0	0	0	0	0	0	0	0
	1131	0	0	0	0	0	0	0	0	0	0	0	0	0	0	0	0	0	0	0	0
	1132	0	0	0	0	0	0	0	0	0	0	0	0	0	0	0	0	0	0	0	0
	1133	0	0	0	0	0	0	0	0	0	0	0	0	0	0	0	0	0	0	0	0
	1134	0	0	0	0	0	0	0	0	0	0	0	0	0	0	0	0	0	0	0	0
	1135	0	0	0	0	0	0	0	0	0	0	0	0	0	0	0	0	0	0	0	0
	1136	0	0	0	0	0	0	0	0	0	0	0	0	0	0	0	0	0	0	0	0
	1137	0	0	0	0	0	0	0	0	0	0	0	0	0	0	0	0	0	0	0	0
	1138	0	0	0	0	0	0	0	0	0	0	0	0	0	0	0	0	0	0	0	0
	1139	0	0	0	0	0	0	0	0	0	0	0	0	0	0	0	0	0	0	0	0
	1140	0	0	0	0	0	0	0	0	0	0	0	0	0	0	0	0	0	0	0	0
	1141	0	0	0	0	0	0	0	0	0	0	0	0	0	0	0	0	0	0	0	0
	1142	0	0	0	0	0	0	0	0	0	0	0	0	0	0	0	0	0	0	0	0
	1143	0	0	0	0	0	0	0	0	0	0	0	0	0	0	0	0	0	0	0	0
	1144	0	0	0	0	0	0	0	0	0	0	0	0	0	0	0	0	0	0	0	0
	1145	0	0	0	0	0	0	0	0	0	0	0	0	0	0	0	0	0	0	0	0
	1146	0	0	0	0	0	0	0	0	0	0	0	0	0	0	0	0	0	0	0	0
	1147	0	0	0	0	0	0	0	0	0	0	0	0	0	0	0	0	0	0	0	0
	1148	0	0	0	0	0	0	0	0	0	0	0	0	0	0	0	0	0	0	0	0
	1149	0	0	0	0	0	0	0	0	0	0	0	0	0	0	0	0	0	0	0	0
	1150	0	0	0	0	0	0	0	0	0	0	0	0	0	0	0	0	0	0	0	0
	1151	0	0	0	0	0	0	0	0	0	0	0	0	0	0	0	0	0	0	0	0
	1152	0	0	0	0	0	0	0	0	0	0	0	0	0	0	0	0	0	0	0	0
	1153	0	0	0	0	0	0	0	0	0	0	0	0	0	0	0	0	0	0	0	0
	1154	0	0	0	0	0	0	0	0	0	0	0	0	0	0	0	0	0	0	0	0
	1155	0	0	0	0	0	0	0	0	0	0	0	0	0	0	0	0	0	0	0	0
	1156	0	0	0	0	0	0	0	0	0	0	0	0	0	0	0	0	0	0	0	0
	1157	0	0	0	0	0	0	0	0	0	0	0	0	0	0	0	0	0	0	0	0
	1158	0	0	0	0	0	0	0	0	0	0	0	0	0	0	0	0	0	0	0	0
	1159	0	0	0	0	0	0	0	0	0	0	0	0	0	0	0	0	0	0	0	0
	1160	0	0	0	0	0	0	0	0	0	0	0	0	0	0	0	0	0	0	0	0
	1161	0	0	0	0	0	0	0	0	0	0	0	0	0	0	0	0	0	0	0	0
	1162	0	0	0	0	0	0	0	0	0	0	0	0	0	0	0	0	0	0	0	0
	1163	0	0	0	0	0	0	0	0	0	0	0	0	0	0	0	0	0	0	0	0
	1164	0	0	0	0	0	0	0	0	0	0	0	0	0	0	0	0	0	0	0	0
	1165	0	0	0	0	0	0	0	0	0	0	0	0	0	0	0	0	0	0	0	0
	1166	0	0	0	0	0	0	0	0	0	0	0	0	0	0	0	0	0	0	0	0
	1167	0	0	0	0	0	0	0	0	0	0	0	0	0	0	0	0	0	0	0	0
	1168	0	0	0	0	0	0	0	0	0	0	0	0	0	0	0	0	0	0	0	0
	1169	0	0	0	0	0	0	0	0	0	0	0	0	0	0	0	0	0	0	0	0
	1170	0	0	0	0	0	0	0	0	0	0	0	0	0	0	0	0	0	0	0	0
	1171	0	0	0	0	0	0	0	0	0	0	0	0	0	0	0	0	0	0	0	0
	1172	0	0	0	0	0	0	0	0	0	0	0	0	0	0	0	0	0	0	0	0
	1173	0	0	0	0	0	0	0	0	0	0	0	0	0	0	0	0	0	0	0	0
	1174	0	0	0	0	0	0	0	0	0	0	0	0	0	0	0	0	0	0	0	0
	1175	0	0	0	0	0	0	0	0	0	0	0	0	0	0	0	0	0	0	0	0
	1176	0	0	0	0	0	0	0	0	0	0	0	0	0	0	0	0	0	0	0	0
	1177	0	0	0	0	0	0	0	0	0	0	0	0	0	0	0	0	0	0	0	0
	1178	0	0	0	0	0	0	0	0	0	0	0	0	0	0	0	0	0	0	0	0
	1179	0	0	0	0	0	0	0	0	0	0	0	0	0	0	0	0	0	0	0	0
	1180	0	0	0	0	0	0	0	0	0	0	0	0	0	0	0	0	0	0	0	0
	1181	0	0	0	0	0	0	0	0	0	0	0	0	0	0	0	0	0	0	0	0
	1182	0	0	0	0	0	0	0	0	0	0	0	0	0	0	0	0	0	0	0	0
	1183	0	0	0	0	0	0	0	0	0	0	0	0	0	0	0	0	0	0	0	0
	1184	0	0	0	0	0	0	0	0	0	0	0	0	0	0	0	0	0	0	0	0
	1185	0	0	0	0	0	0	0	0	0	0	0	0	0	0	0	0	0	0	0	0
	1186	0	0	0	0	0	0	0	0	0	0	0	0	0	0	0	0	0	0	0	0
	1187	0	0	0	0	0	0	0	0	0	0	0	0	0	0	0	0	0	0	0	0
	1188	0	0	0	0	0	0	0	0	0	0	0	0	0	0	0	0	0	0	0	0
	1189	0	0	0	0	0	0	0	0	0	0	0	0	0	0	0	0	0	0	0	0
	1190	0	0	0	0	0	0	0	0	0	0	0	0	0	0	0	0	0	0	0	0
	1191	0	0	0	0	0	0	0	0	0	0	0	0	0	0	0	0	0	0	0	0
	1192	0	0	0	0	0	0	0	0	0	0	0	0	0	0	0	0	0	0	0	0
	1193	0	0	0	0	0	0	0	0	0	0	0	0	0	0	0	0	0	0	0	0
	1194	0	0	0	0	0	0	0	0	0	0	0	0	0	0	0	0	0	0	0	0
	1195	0	0	0	0	0	0	0	0	0	0	0	0	0	0	0	0	0	0	0	0
	1196	0	0	0	0	0	0	0	0	0	0	0	0	0	0	0	0	0	0	0	0
	1197	0	0	0	0	0	0	0	0	0	0	0	0	0	0	0	0	0	0	0	0
	1198	0	0	0	0	0	0	0	0	0	0	0	0	0	0	0	0	0	0	0	0
	1199	0	0	0	0	0	0	0	0	0	0	0	0	0	0	0	0	0	0	0	0
	1200	0	0	0	0	0	0	0	0	0	0	0	0	0	0	0	0	0	0	0	0
	1201	0	0	0	0	0	0	0	0	0	0	0	0	0	0	0	0	0	0	0	0
	1202	0	0	0	0	0	0	0	0	0	0	0	0	0	0	0	0	0	0	0	0
	1203	0	0	0	0	0	0	0	0	0	0	0	0	0	0	0	0	0	0	0	0
	1204	0	0	0	0	0	0	0	0	0	0	0	0	0	0	0	0	0	0	0	0
	1205	0	0	0	0	0	0	0	0	0	0	0	0	0	0	0	0	0	0	0	0
	1206	0	0	0	0	0	0	0	0	0	0	0	0	0	0	0	0	0	0	0	0
	1207	0	0	0	0	0	0	0	0	0	0	0	0	0	0	0	0	0	0	0	0
	1208	0	0	0	0	0	0	0	0	0	0	0	0	0	0	0	0	0	0	0	0
	1209	0	0	0	0	0	0	0	0	0	0	0	0	0	0	0	0	0	0	0	0
	1210	0	0	0	0	0	0	0	0	0	0	0	0	0	0	0	0	0	0	0	0
	1211	0	0	0	0	0	0	0	0	0	0	0	0	0	0	0	0	0	0	0	0
	1212	0	0	0	0	0	0	0	0	0	0	0	0	0	0	0	0	0	0	0	0
	1213	0	0	0	0	0	0	0	0	0	0	0	0	0	0	0	0	0	0	0	0										0	0	0	0	0	0	0	0	0	0	0	0	0	0	0	0	0	0	0
	1214	0	0	0	0	0	0	0	0	0	0	0	0	0	0	0	0	0	0	0	0										0	0	0	0	0	0	0	0	0	0	0	0	0	0	0	0	0	0	0
	1215	0	0	0	0	0	0	0	0	0	0	0	0	0	0	0	0	0	0	0	0										0	0	0	0	0	0	0	0	0	0	0	0	0	0	0	0	0	0	0
	1216	0	0	0	0	0	0	0	0	0	0	0	0	0	0	0	0	0	0	0	0										0	0	0	0	0	0	0	0	0	0	0	0	0	0	0	0	0	0	0
	1217	0	0	0	0	0	0	0	0	0	0	0	0	0	0	0	0	0	0	0	0										0	0	0	0	0	0	0	0	0	0	0	0	0	0	0	0	0	0	0
																															0	0	0	0	0	0	0	0	0	0	0	0	0	0	0	0	0	0	0
SUM	609	-404	6388	158	2244	1952	-412	-432	-206	-4178	-278	0	0	0	0	0	0	0	0	0	0									571915	-2105	49394	1358	14650	13583	-2395	-2510	-1183	-24084	-1604	0	0	0	0	0	0	0	0	0
CN X SUM OF ELEM.		-2424	38328	948	13464	11712	-2472	-2592	-1236	-25068	-1668	0	0	0	0	0	0	0	0	0	0
		7	8	9	10	11	12	13	14	15	16	17	18	19	20	21	22	23	24	25	26
	SC	1.15154	0.775965	0.698085	0.919044	0.862254	1.03215	1.03267	1.0448	1.04086	1.0399	#DIV/0!	#DIV/0!	#DIV/0!	#DIV/0!	#DIV/0!	#DIV/0!	#DIV/0!	#DIV/0!	#DIV/0!	#DIV/0!
[truncated: 3 more columns]

## Sheet: Psim & Pdsim 3
	OPTINALYSIS: SEQUENCE ANALYSIS THROUGH A LOOKING-GLASS
	CN = Central node; Kc = Kabirian coefficient of similarity; PSim. = Probability level of similarity; PDsim. = Probability level of dissimilarity																NUM. = Numeration; DEN. = Denumeration
				For Kc >1 and -ves		For Kc <1
	RESULTS	CN	Kc	Psim,	Pdsim.	Psim,	Pdsim.										NUM	DEN		NUM	DEN
	GI: Meanic mirror	26	0.979707	1.08643	-0.0864328	0.920443	0.0795565										1.02029	0.939122		-0.939122	-1.02029
	GII: Meanic mirror	26	0.91827	1.43311	-0.433115	0.697781	0.302219										1.08173	0.75481		-0.75481	-1.08173
	GIII: Meanic mirror	26	0.831949	2.35567	-1.35567	0.424508	0.575492										1.16805	0.495847		-0.495847	-1.16805
	GIV: Meanic mirror	26	0.864129	1.91744	-0.917442	0.521528	0.478472										1.13587	0.592388		-0.592388	-1.13587
	GV: Meanic mirror	26	0.740963	5.64872	-4.64872	0.177031	0.822969										1.25904	0.222889		-0.222889	-1.25904
	GVI: Meanic mirror	26	1.17948	0.533343	0.466657	1.87496	-0.874965										0.820519	1.53844		-1.53844	-0.820519
	Seq.	26	#DIV/0!	#DIV/0!	#DIV/0!	#DIV/0!	#DIV/0!										#DIV/0!	#DIV/0!		#DIV/0!	#DIV/0!
	Seq.	26	#DIV/0!	#DIV/0!	#DIV/0!	#DIV/0!	#DIV/0!										#DIV/0!	#DIV/0!		#DIV/0!	#DIV/0!
	Seq.	26	#DIV/0!	#DIV/0!	#DIV/0!	#DIV/0!	#DIV/0!										#DIV/0!	#DIV/0!		#DIV/0!	#DIV/0!
	Seq.	26	#DIV/0!	#DIV/0!	#DIV/0!	#DIV/0!	#DIV/0!										#DIV/0!	#DIV/0!		#DIV/0!	#DIV/0!
	Seq.	26	#DIV/0!	#DIV/0!	#DIV/0!	#DIV/0!	#DIV/0!										#DIV/0!	#DIV/0!		#DIV/0!	#DIV/0!
	Seq.	26	#DIV/0!	#DIV/0!	#DIV/0!	#DIV/0!	#DIV/0!										#DIV/0!	#DIV/0!		#DIV/0!	#DIV/0!
	Seq.	26	#DIV/0!	#DIV/0!	#DIV/0!	#DIV/0!	#DIV/0!										#DIV/0!	#DIV/0!		#DIV/0!	#DIV/0!
	Seq.	26	#DIV/0!	#DIV/0!	#DIV/0!	#DIV/0!	#DIV/0!										#DIV/0!	#DIV/0!		#DIV/0!	#DIV/0!
	Seq.	26	#DIV/0!	#DIV/0!	#DIV/0!	#DIV/0!	#DIV/0!										#DIV/0!	#DIV/0!		#DIV/0!	#DIV/0!
	Seq.	26	#DIV/0!	#DIV/0!	#DIV/0!	#DIV/0!	#DIV/0!										#DIV/0!	#DIV/0!		#DIV/0!	#DIV/0!
	Seq.	26	#DIV/0!	#DIV/0!	#DIV/0!	#DIV/0!	#DIV/0!										#DIV/0!	#DIV/0!		#DIV/0!	#DIV/0!
	Seq.	26	#DIV/0!	#DIV/0!	#DIV/0!	#DIV/0!	#DIV/0!										#DIV/0!	#DIV/0!		#DIV/0!	#DIV/0!
	Seq.	26	#DIV/0!	#DIV/0!	#DIV/0!	#DIV/0!	#DIV/0!										#DIV/0!	#DIV/0!		#DIV/0!	#DIV/0!
	Seq.	26	#DIV/0!	#DIV/0!	#DIV/0!	#DIV/0!	#DIV/0!										#DIV/0!	#DIV/0!		#DIV/0!	#DIV/0!
	SEQUENCES	INPUT SEQUENCE																												SEQUENCES	COMPUTATION AND CALCULATIONS
	QUANTITATIVE SCALE	GI: Meanic mirror	GII: Meanic mirror	GIII: Meanic mirror	GIV: Meanic mirror	GV: Meanic mirror	GVI: Meanic mirror	Seq.	Seq.	Seq.	Seq.	Seq.	Seq.	Seq.	Seq.	Seq.	Seq.	Seq.	Seq.	Seq.	Seq.									QUANTITATIVE SCALE	GI: Meanic mirror	GII: Meanic mirror	GIII: Meanic mirror	GIV: Meanic mirror	GV: Meanic mirror	GVI: Meanic mirror	Seq.	Seq.	Seq.	Seq.	Seq.	Seq.	Seq.	Seq.	Seq.	Seq.	Seq.	Seq.	Seq.
	1	4.78	2.33	8.65	0.43	-765	-654	0	0	0	0	0	0	0	0	0	0	0	0	0	0									1	4.78	2.33	8.65	0.43	-765	-654	0	0	0	0	0	0	0	0	0	0	0	0	0
	2	5.24	2.45	11.4	0.456	-467	-456	0	0	0	0	0	0	0	0	0	0	0	0	0	0									2	10.48	4.9	22.8	0.912	-934	-912	0	0	0	0	0	0	0	0	0	0	0	0	0
	3	5.55	3.12	12.34	0.54	-99	-433	0	0	0	0	0	0	0	0	0	0	0	0	0	0									3	16.65	9.36	37.02	1.62	-297	-1299	0	0	0	0	0	0	0	0	0	0	0	0	0
	4	5.63	3.44	12.78	0.56	-76	-312	0	0	0	0	0	0	0	0	0	0	0	0	0	0									4	22.52	13.76	51.12	2.24	-304	-1248	0	0	0	0	0	0	0	0	0	0	0	0	0
	5	5.89	4.67	23.45	0.98	-67	-234	0	0	0	0	0	0	0	0	0	0	0	0	0	0									5	29.45	23.35	117.25	4.9	-335	-1170	0	0	0	0	0	0	0	0	0	0	0	0	0
	6	5.98	5.65	23.54	4	-65	-56	0	0	0	0	0	0	0	0	0	0	0	0	0	0									6	35.88	33.9	141.24	24	-390	-336	0	0	0	0	0	0	0	0	0	0	0	0	0
	7	5.98	6.78	34.56	7	-65	-56	0	0	0	0	0	0	0	0	0	0	0	0	0	0									7	41.86	47.46	241.92	49	-455	-392	0	0	0	0	0	0	0	0	0	0	0	0	0
	8	6.34	7.23	34.76	8	-65	-55	0	0	0	0	0	0	0	0	0	0	0	0	0	0									8	50.72	57.84	278.08	64	-520	-440	0	0	0	0	0	0	0	0	0	0	0	0	0
	9	6.45	7.87	38.46	9	-46	-46	0	0	0	0	0	0	0	0	0	0	0	0	0	0									9	58.05	70.83	346.14	81	-414	-414	0	0	0	0	0	0	0	0	0	0	0	0	0
	10	6.45	7.98	45.21	10.35	-45	-46	0	0	0	0	0	0	0	0	0	0	0	0	0	0									10	64.5	79.8	452.1	103.5	-450	-460	0	0	0	0	0	0	0	0	0	0	0	0	0
	11	6.46	8.89	45.32	12	-36	-45	0	0	0	0	0	0	0	0	0	0	0	0	0	0									11	71.06	97.79	498.52	132	-396	-495	0	0	0	0	0	0	0	0	0	0	0	0	0
	12	6.89	8.89	45.56	21.45	-35	-42	0	0	0	0	0	0	0	0	0	0	0	0	0	0									12	82.68	106.68	546.72	257.4	-420	-504	0	0	0	0	0	0	0	0	0	0	0	0	0
	13	6.98	9.45	45.65	23.45	22	-35	0	0	0	0	0	0	0	0	0	0	0	0	0	0									13	90.74	122.85	593.45	304.85	286	-455	0	0	0	0	0	0	0	0	0	0	0	0	0
	14	7.36	9.99	67.34	23.45	23	-35	0	0	0	0	0	0	0	0	0	0	0	0	0	0									14	103.04	139.86	942.76	328.3	322	-490	0	0	0	0	0	0	0	0	0	0	0	0	0
	15	7.43	10.56	76.45	23.45	45	-34	0	0	0	0	0	0	0	0	0	0	0	0	0	0									15	111.45	158.4	1146.75	351.75	675	-510	0	0	0	0	0	0	0	0	0	0	0	0	0
	16	7.45	15.45	78.23	23.66	45	-32	0	0	0	0	0	0	0	0	0	0	0	0	0	0									16	119.2	247.2	1251.68	378.56	720	-512	0	0	0	0	0	0	0	0	0	0	0	0	0
	17	7.45	15.78	89.45	26.34	67	-25	0	0	0	0	0	0	0	0	0	0	0	0	0	0									17	126.65	268.26	1520.65	447.78	1139	-425	0	0	0	0	0	0	0	0	0	0	0	0	0
	18	7.45	16.11	89.98	45.67	67	-24	0	0	0	0	0	0	0	0	0	0	0	0	0	0									18	134.1	289.98	1619.64	822.06	1206	-432	0	0	0	0	0	0	0	0	0	0	0	0	0
	19	7.77	16.34	121.23	56.23	89	-24	0	0	0	0	0	0	0	0	0	0	0	0	0	0									19	147.63	310.46	2303.37	1068.37	1691	-456	0	0	0	0	0	0	0	0	0	0	0	0	0
	20	7.78	16.46	134.32	66.24	245	-24	0	0	0	0	0	0	0	0	0	0	0	0	0	0									20	155.6	329.2	2686.4	1324.8	4900	-480	0	0	0	0	0	0	0	0	0	0	0	0	0
	21	7.87	26.99	156.56	87.34	345	-23	0	0	0	0	0	0	0	0	0	0	0	0	0	0									21	165.27	566.79	3287.76	1834.14	7245	-483	0	0	0	0	0	0	0	0	0	0	0	0	0
	22	8.21	27.56	256.34	98.56	345	-23	0	0	0	0	0	0	0	0	0	0	0	0	0	0									22	180.62	606.32	5639.48	2168.32	7590	-506	0	0	0	0	0	0	0	0	0	0	0	0	0
	23	8.34	27.76	643.23	99	465	-15	0	0	0	0	0	0	0	0	0	0	0	0	0	0									23	191.82	638.48	14794.3	2277	10695	-345	0	0	0	0	0	0	0	0	0	0	0	0	0
	24	8.45	28.02	783.34	123.45	675	-13	0	0	0	0	0	0	0	0	0	0	0	0	0	0									24	202.8	672.48	18800.2	2962.8	16200	-312	0	0	0	0	0	0	0	0	0	0	0	0	0
	25	8.56	28.51	6897.35	353.23	4567	-11	0	0	0	0	0	0	0	0	0	0	0	0	0	0									25	214	712.75	172434	8830.75	114175	-275	0	0	0	0	0	0	0	0	0	0	0	0	0
	26	0	0	0	0	0	0	0	0	0	0	0	0	0	0	0	0	0	0	0	0									26	0	0	0	0	0	0	0	0	0	0	0	0	0	0	0	0	0	0	0
	27	6.91	12.73	391.02	44.99	206.76	-110.12	0	0	0	0	0	0	0	0	0	0	0	0	0	0									27	186.57	343.71	10557.5	1214.73	5582.52	-2973.24	0	0	0	0	0	0	0	0	0	0	0	0	0
	28	6.91	12.73	391.02	44.99	206.76	-110.12	0	0	0	0	0	0	0	0	0	0	0	0	0	0									28	193.48	356.44	10948.6	1259.72	5789.28	-3083.36	0	0	0	0	0	0	0	0	0	0	0	0	0
	29	6.91	12.73	391.02	44.99	206.76	-110.12	0	0	0	0	0	0	0	0	0	0	0	0	0	0									29	200.39	369.17	11339.6	1304.71	5996.04	-3193.48	0	0	0	0	0	0	0	0	0	0	0	0	0
	30	6.91	12.73	391.02	44.99	206.76	-110.12	0	0	0	0	0	0	0	0	0	0	0	0	0	0									30	207.3	381.9	11730.6	1349.7	6202.8	-3303.6	0	0	0	0	0	0	0	0	0	0	0	0	0
	31	6.91	12.73	391.02	44.99	206.76	-110.12	0	0	0	0	0	0	0	0	0	0	0	0	0	0									31	214.21	394.63	12121.6	1394.69	6409.56	-3413.72	0	0	0	0	0	0	0	0	0	0	0	0	0
	32	6.91	12.73	391.02	44.99	206.76	-110.12	0	0	0	0	0	0	0	0	0	0	0	0	0	0									32	221.12	407.36	12512.6	1439.68	6616.32	-3523.84	0	0	0	0	0	0	0	0	0	0	0	0	0
	33	6.91	12.73	391.02	44.99	206.76	-110.12	0	0	0	0	0	0	0	0	0	0	0	0	0	0									33	228.03	420.09	12903.7	1484.67	6823.08	-3633.96	0	0	0	0	0	0	0	0	0	0	0	0	0
	34	6.91	12.73	391.02	44.99	206.76	-110.12	0	0	0	0	0	0	0	0	0	0	0	0	0	0									34	234.94	432.82	13294.7	1529.66	7029.84	-3744.08	0	0	0	0	0	0	0	0	0	0	0	0	0
	35	6.91	12.73	391.02	44.99	206.76	-110.12	0	0	0	0	0	0	0	0	0	0	0	0	0	0									35	241.85	445.55	13685.7	1574.65	7236.6	-3854.2	0	0	0	0	0	0	0	0	0	0	0	0	0
	36	6.91	12.73	391.02	44.99	206.76	-110.12	0	0	0	0	0	0	0	0	0	0	0	0	0	0									36	248.76	458.28	14076.7	1619.64	7443.36	-3964.32	0	0	0	0	0	0	0	0	0	0	0	0	0
	37	6.91	12.73	391.02	44.99	206.76	-110.12	0	0	0	0	0	0	0	0	0	0	0	0	0	0									37	255.67	471.01	14467.7	1664.63	7650.12	-4074.44	0	0	0	0	0	0	0	0	0	0	0	0	0
	38	6.91	12.73	391.02	44.99	206.76	-110.12	0	0	0	0	0	0	0	0	0	0	0	0	0	0									38	262.58	483.74	14858.8	1709.62	7856.88	-4184.56	0	0	0	0	0	0	0	0	0	0	0	0	0
	39	6.91	12.73	391.02	44.99	206.76	-110.12	0	0	0	0	0	0	0	0	0	0	0	0	0	0									39	269.49	496.47	15249.8	1754.61	8063.64	-4294.68	0	0	0	0	0	0	0	0	0	0	0	0	0
	40	6.91	12.73	391.02	44.99	206.76	-110.12	0	0	0	0	0	0	0	0	0	0	0	0	0	0									40	276.4	509.2	15640.8	1799.6	8270.4	-4404.8	0	0	0	0	0	0	0	0	0	0	0	0	0
	41	6.91	12.73	391.02	44.99	206.76	-110.12	0	0	0	0	0	0	0	0	0	0	0	0	0	0									41	283.31	521.93	16031.8	1844.59	8477.16	-4514.92	0	0	0	0	0	0	0	0	0	0	0	0	0
	42	6.91	12.73	391.02	44.99	206.76	-110.12	0	0	0	0	0	0	0	0	0	0	0	0	0	0									42	290.22	534.66	16422.8	1889.58	8683.92	-4625.04	0	0	0	0	0	0	0	0	0	0	0	0	0
	43	6.91	12.73	391.02	44.99	206.76	-110.12	0	0	0	0	0	0	0	0	0	0	0	0	0	0									43	297.13	547.39	16813.9	1934.57	8890.68	-4735.16	0	0	0	0	0	0	0	0	0	0	0	0	0
	44	6.91	12.73	391.02	44.99	206.76	-110.12	0	0	0	0	0	0	0	0	0	0	0	0	0	0									44	304.04	560.12	17204.9	1979.56	9097.44	-4845.28	0	0	0	0	0	0	0	0	0	0	0	0	0
	45	6.91	12.73	391.02	44.99	206.76	-110.12	0	0	0	0	0	0	0	0	0	0	0	0	0	0									45	310.95	572.85	17595.9	2024.55	9304.2	-4955.4	0	0	0	0	0	0	0	0	0	0	0	0	0
	46	6.91	12.73	391.02	44.99	206.76	-110.12	0	0	0	0	0	0	0	0	0	0	0	0	0	0									46	317.86	585.58	17986.9	2069.54	9510.96	-5065.52	0	0	0	0	0	0	0	0	0	0	0	0	0
	47	6.91	12.73	391.02	44.99	206.76	-110.12	0	0	0	0	0	0	0	0	0	0	0	0	0	0									47	324.77	598.31	18377.9	2114.53	9717.72	-5175.64	0	0	0	0	0	0	0	0	0	0	0	0	0
	48	6.91	12.73	391.02	44.99	206.76	-110.12	0	0	0	0	0	0	0	0	0	0	0	0	0	0									48	331.68	611.04	18769	2159.52	9924.48	-5285.76	0	0	0	0	0	0	0	0	0	0	0	0	0
	49	6.91	12.73	391.02	44.99	206.76	-110.12	0	0	0	0	0	0	0	0	0	0	0	0	0	0									49	338.59	623.77	19160	2204.51	10131.2	-5395.88	0	0	0	0	0	0	0	0	0	0	0	0	0
	50	6.91	12.73	391.02	44.99	206.76	-110.12	0	0	0	0	0	0	0	0	0	0	0	0	0	0									50	345.5	636.5	19551	2249.5	10338	-5506	0	0	0	0	0	0	0	0	0	0	0	0	0
	51	6.91	12.73	391.02	44.99	206.76	-110.12	0	0	0	0	0	0	0	0	0	0	0	0	0	0									51	352.41	649.23	19942	2294.49	10544.8	-5616.12	0	0	0	0	0	0	0	0	0	0	0	0	0
	52	0	0	0	0	0	0	0	0	0	0	0	0	0	0	0	0	0	0	0	0									52	0	0	0	0	0	0	0	0	0	0	0	0	0	0	0	0	0	0	0
	53	0	0	0	0	0	0	0	0	0	0	0	0	0	0	0	0	0	0	0	0									53	0	0	0	0	0	0	0	0	0	0	0	0	0	0	0	0	0	0	0
	54	0	0	0	0	0	0	0	0	0	0	0	0	0	0	0	0	0	0	0	0									54	0	0	0	0	0	0	0	0	0	0	0	0	0	0	0	0	0	0	0
	55	0	0	0	0	0	0	0	0	0	0	0	0	0	0	0	0	0	0	0	0									55	0	0	0	0	0	0	0	0	0	0	0	0	0	0	0	0	0	0	0
	56	0	0	0	0	0	0	0	0	0	0	0	0	0	0	0	0	0	0	0	0									56	0	0	0	0	0	0	0	0	0	0	0	0	0	0	0	0	0	0	0
	57	0	0	0	0	0	0	0	0	0	0	0	0	0	0	0	0	0	0	0	0									57	0	0	0	0	0	0	0	0	0	0	0	0	0	0	0	0	0	0	0
	58	0	0	0	0	0	0	0	0	0	0	0	0	0	0	0	0	0	0	0	0									58	0	0	0	0	0	0	0	0	0	0	0	0	0	0	0	0	0	0	0
	59	0	0	0	0	0	0	0	0	0	0	0	0	0	0	0	0	0	0	0	0									59	0	0	0	0	0	0	0	0	0	0	0	0	0	0	0	0	0	0	0
	60	0	0	0	0	0	0	0	0	0	0	0	0	0	0	0	0	0	0	0	0									60	0	0	0	0	0	0	0	0	0	0	0	0	0	0	0	0	0	0	0
	61	0	0	0	0	0	0	0	0	0	0	0	0	0	0	0	0	0	0	0	0									61	0	0	0	0	0	0	0	0	0	0	0	0	0	0	0	0	0	0	0
	62	0	0	0	0	0	0	0	0	0	0	0	0	0	0	0	0	0	0	0	0									62	0	0	0	0	0	0	0	0	0	0	0	0	0	0	0	0	0	0	0
	63	0	0	0	0	0	0	0	0	0	0	0	0	0	0	0	0	0	0	0	0									63	0	0	0	0	0	0	0	0	0	0	0	0	0	0	0	0	0	0	0
	64	0	0	0	0	0	0	0	0	0	0	0	0	0	0	0	0	0	0	0	0									64	0	0	0	0	0	0	0	0	0	0	0	0	0	0	0	0	0	0	0
	65	0	0	0	0	0	0	0	0	0	0	0	0	0	0	0	0	0	0	0	0									65	0	0	0	0	0	0	0	0	0	0	0	0	0	0	0	0	0	0	0
	66	0	0	0	0	0	0	0	0	0	0	0	0	0	0	0	0	0	0	0	0									66	0	0	0	0	0	0	0	0	0	0	0	0	0	0	0	0	0	0	0
	67	0	0	0	0	0	0	0	0	0	0	0	0	0	0	0	0	0	0	0	0									67	0	0	0	0	0	0	0	0	0	0	0	0	0	0	0	0	0	0	0
	68	0	0	0	0	0	0	0	0	0	0	0	0	0	0	0	0	0	0	0	0									68	0	0	0	0	0	0	0	0	0	0	0	0	0	0	0	0	0	0	0
	69	0	0	0	0	0	0	0	0	0	0	0	0	0	0	0	0	0	0	0	0									69	0	0	0	0	0	0	0	0	0	0	0	0	0	0	0	0	0	0	0
	70	0	0	0	0	0	0	0	0	0	0	0	0	0	0	0	0	0	0	0	0									70	0	0	0	0	0	0	0	0	0	0	0	0	0	0	0	0	0	0	0
	71	0	0	0	0	0	0	0	0	0	0	0	0	0	0	0	0	0	0	0	0									71	0	0	0	0	0	0	0	0	0	0	0	0	0	0	0	0	0	0	0
	72	0	0	0	0	0	0	0	0	0	0	0	0	0	0	0	0	0	0	0	0									72	0	0	0	0	0	0	0	0	0	0	0	0	0	0	0	0	0	0	0
	73	0	0	0	0	0	0	0	0	0	0	0	0	0	0	0	0	0	0	0	0									73	0	0	0	0	0	0	0	0	0	0	0	0	0	0	0	0	0	0	0
	74	0	0	0	0	0	0	0	0	0	0	0	0	0	0	0	0	0	0	0	0									74	0	0	0	0	0	0	0	0	0	0	0	0	0	0	0	0	0	0	0
	75	0	0	0	0	0	0	0	0	0	0	0	0	0	0	0	0	0	0	0	0									75	0	0	0	0	0	0	0	0	0	0	0	0	0	0	0	0	0	0	0
	76	0	0	0	0	0	0	0	0	0	0	0	0	0	0	0	0	0	0	0	0									76	0	0	0	0	0	0	0	0	0	0	0	0	0	0	0	0	0	0	0
	77	0	0	0	0	0	0	0	0	0	0	0	0	0	0	0	0	0	0	0	0									77	0	0	0	0	0	0	0	0	0	0	0	0	0	0	0	0	0	0	0
	78	0	0	0	0	0	0	0	0	0	0	0	0	0	0	0	0	0	0	0	0									78	0	0	0	0	0	0	0	0	0	0	0	0	0	0	0	0	0	0	0
	79	0	0	0	0	0	0	0	0	0	0	0	0	0	0	0	0	0	0	0	0									79	0	0	0	0	0	0	0	0	0	0	0	0	0	0	0	0	0	0	0
	80	0	0	0	0	0	0	0	0	0	0	0	0	0	0	0	0	0	0	0	0									80	0	0	0	0	0	0	0	0	0	0	0	0	0	0	0	0	0	0	0
	81	0	0	0	0	0	0	0	0	0	0	0	0	0	0	0	0	0	0	0	0									81	0	0	0	0	0	0	0	0	0	0	0	0	0	0	0	0	0	0	0
	82	0	0	0	0	0	0	0	0	0	0	0	0	0	0	0	0	0	0	0	0									82	0	0	0	0	0	0	0	0	0	0	0	0	0	0	0	0	0	0	0
	83	0	0	0	0	0	0	0	0	0	0	0	0	0	0	0	0	0	0	0	0									83	0	0	0	0	0	0	0	0	0	0	0	0	0	0	0	0	0	0	0
	84	0	0	0	0	0	0	0	0	0	0	0	0	0	0	0	0	0	0	0	0									84	0	0	0	0	0	0	0	0	0	0	0	0	0	0	0	0	0	0	0
	85	0	0	0	0	0	0	0	0	0	0	0	0	0	0	0	0	0	0	0	0									85	0	0	0	0	0	0	0	0	0	0	0	0	0	0	0	0	0	0	0
	86	0	0	0	0	0	0	0	0	0	0	0	0	0	0	0	0	0	0	0	0									86	0	0	0	0	0	0	0	0	0	0	0	0	0	0	0	0	0	0	0
	87	0	0	0	0	0	0	0	0	0	0	0	0	0	0	0	0	0	0	0	0									87	0	0	0	0	0	0	0	0	0	0	0	0	0	0	0	0	0	0	0
	88	0	0	0	0	0	0	0	0	0	0	0	0	0	0	0	0	0	0	0	0									88	0	0	0	0	0	0	0	0	0	0	0	0	0	0	0	0	0	0	0
	89	0	0	0	0	0	0	0	0	0	0	0	0	0	0	0	0	0	0	0	0									89	0	0	0	0	0	0	0	0	0	0	0	0	0	0	0	0	0	0	0
	90	0	0	0	0	0	0	0	0	0	0	0	0	0	0	0	0	0	0	0	0									90	0	0	0	0	0	0	0	0	0	0	0	0	0	0	0	0	0	0	0
	91	0	0	0	0	0	0	0	0	0	0	0	0	0	0	0	0	0	0	0	0									91	0	0	0	0	0	0	0	0	0	0	0	0	0	0	0	0	0	0	0
	92	0	0	0	0	0	0	0	0	0	0	0	0	0	0	0	0	0	0	0	0									92	0	0	0	0	0	0	0	0	0	0	0	0	0	0	0	0	0	0	0
	93	0	0	0	0	0	0	0	0	0	0	0	0	0	0	0	0	0	0	0	0									93	0	0	0	0	0	0	0	0	0	0	0	0	0	0	0	0	0	0	0
	94	0	0	0	0	0	0	0	0	0	0	0	0	0	0	0	0	0	0	0	0									94	0	0	0	0	0	0	0	0	0	0	0	0	0	0	0	0	0	0	0
	95	0	0	0	0	0	0	0	0	0	0	0	0	0	0	0	0	0	0	0	0									95	0	0	0	0	0	0	0	0	0	0	0	0	0	0	0	0	0	0	0
	96	0	0	0	0	0	0	0	0	0	0	0	0	0	0	0	0	0	0	0	0									96	0	0	0	0	0	0	0	0	0	0	0	0	0	0	0	0	0	0	0
	97	0	0	0	0	0	0	0	0	0	0	0	0	0	0	0	0	0	0	0	0									97	0	0	0	0	0	0	0	0	0	0	0	0	0	0	0	0	0	0	0
	98	0	0	0	0	0	0	0	0	0	0	0	0	0	0	0	0	0	0	0	0									98	0	0	0	0	0	0	0	0	0	0	0	0	0	0	0	0	0	0	0
	99	0	0	0	0	0	0	0	0	0	0	0	0	0	0	0	0	0	0	0	0									99	0	0	0	0	0	0	0	0	0	0	0	0	0	0	0	0	0	0	0
	100	0	0	0	0	0	0	0	0	0	0	0	0	0	0	0	0	0	0	0	0									100	0	0	0	0	0	0	0	0	0	0	0	0	0	0	0	0	0	0	0
	101	0	0	0	0	0	0	0	0	0	0	0	0	0	0	0	0	0	0	0	0									101	0	0	0	0	0	0	0	0	0	0	0	0	0	0	0	0	0	0	0
	102	0	0	0	0	0	0	0	0	0	0	0	0	0	0	0	0	0	0	0	0									102	0	0	0	0	0	0	0	0	0	0	0	0	0	0	0	0	0	0	0
	103	0	0	0	0	0	0	0	0	0	0	0	0	0	0	0	0	0	0	0	0									103	0	0	0	0	0	0	0	0	0	0	0	0	0	0	0	0	0	0	0
	104	0	0	0	0	0	0	0	0	0	0	0	0	0	0	0	0	0	0	0	0									104	0	0	0	0	0	0	0	0	0	0	0	0	0	0	0	0	0	0	0
	105	0	0	0	0	0	0	0	0	0	0	0	0	0	0	0	0	0	0	0	0									105	0	0	0	0	0	0	0	0	0	0	0	0	0	0	0	0	0	0	0
	106	0	0	0	0	0	0	0	0	0	0	0	0	0	0	0	0	0	0	0	0									106	0	0	0	0	0	0	0	0	0	0	0	0	0	0	0	0	0	0	0
	107	0	0	0	0	0	0	0	0	0	0	0	0	0	0	0	0	0	0	0	0									107	0	0	0	0	0	0	0	0	0	0	0	0	0	0	0	0	0	0	0
	108	0	0	0	0	0	0	0	0	0	0	0	0	0	0	0	0	0	0	0	0									108	0	0	0	0	0	0	0	0	0	0	0	0	0	0	0	0	0	0	0
	109	0	0	0	0	0	0	0	0	0	0	0	0	0	0	0	0	0	0	0	0									109	0	0	0	0	0	0	0	0	0	0	0	0	0	0	0	0	0	0	0
	110	0	0	0	0	0	0	0	0	0	0	0	0	0	0	0	0	0	0	0	0									110	0	0	0	0	0	0	0	0	0	0	0	0	0	0	0	0	0	0	0
	111	0	0	0	0	0	0	0	0	0	0	0	0	0	0	0	0	0	0	0	0									111	0	0	0	0	0	0	0	0	0	0	0	0	0	0	0	0	0	0	0
	112	0	0	0	0	0	0	0	0	0	0	0	0	0	0	0	0	0	0	0	0									112	0	0	0	0	0	0	0	0	0	0	0	0	0	0	0	0	0	0	0
	113	0	0	0	0	0	0	0	0	0	0	0	0	0	0	0	0	0	0	0	0									113	0	0	0	0	0	0	0	0	0	0	0	0	0	0	0	0	0	0	0
	114	0	0	0	0	0	0	0	0	0	0	0	0	0	0	0	0	0	0	0	0									114	0	0	0	0	0	0	0	0	0	0	0	0	0	0	0	0	0	0	0
	115	0	0	0	0	0	0	0	0	0	0	0	0	0	0	0	0	0	0	0	0									115	0	0	0	0	0	0	0	0	0	0	0	0	0	0	0	0	0	0	0
	116	0	0	0	0	0	0	0	0	0	0	0	0	0	0	0	0	0	0	0	0									116	0	0	0	0	0	0	0	0	0	0	0	0	0	0	0	0	0	0	0
	117	0	0	0	0	0	0	0	0	0	0	0	0	0	0	0	0	0	0	0	0									117	0	0	0	0	0	0	0	0	0	0	0	0	0	0	0	0	0	0	0
	118	0	0	0	0	0	0	0	0	0	0	0	0	0	0	0	0	0	0	0	0									118	0	0	0	0	0	0	0	0	0	0	0	0	0	0	0	0	0	0	0
	119	0	0	0	0	0	0	0	0	0	0	0	0	0	0	0	0	0	0	0	0									119	0	0	0	0	0	0	0	0	0	0	0	0	0	0	0	0	0	0	0
	120	0	0	0	0	0	0	0	0	0	0	0	0	0	0	0	0	0	0	0	0									120	0	0	0	0	0	0	0	0	0	0	0	0	0	0	0	0	0	0	0
	121	0	0	0	0	0	0	0	0	0	0	0	0	0	0	0	0	0	0	0	0									121	0	0	0	0	0	0	0	0	0	0	0	0	0	0	0	0	0	0	0
	122	0	0	0	0	0	0	0	0	0	0	0	0	0	0	0	0	0	0	0	0									122	0	0	0	0	0	0	0	0	0	0	0	0	0	0	0	0	0	0	0
	123	0	0	0	0	0	0	0	0	0	0	0	0	0	0	0	0	0	0	0	0									123	0	0	0	0	0	0	0	0	0	0	0	0	0	0	0	0	0	0	0
	124	0	0	0	0	0	0	0	0	0	0	0	0	0	0	0	0	0	0	0	0									124	0	0	0	0	0	0	0	0	0	0	0	0	0	0	0	0	0	0	0
	125	0	0	0	0	0	0	0	0	0	0	0	0	0	0	0	0	0	0	0	0									125	0	0	0	0	0	0	0	0	0	0	0	0	0	0	0	0	0	0	0
	126	0	0	0	0	0	0	0	0	0	0	0	0	0	0	0	0	0	0	0	0									126	0	0	0	0	0	0	0	0	0	0	0	0	0	0	0	0	0	0	0
	127	0	0	0	0	0	0	0	0	0	0	0	0	0	0	0	0	0	0	0	0									127	0	0	0	0	0	0	0	0	0	0	0	0	0	0	0	0	0	0	0
	128	0	0	0	0	0	0	0	0	0	0	0	0	0	0	0	0	0	0	0	0									128	0	0	0	0	0	0	0	0	0	0	0	0	0	0	0	0	0	0	0
	129	0	0	0	0	0	0	0	0	0	0	0	0	0	0	0	0	0	0	0	0									129	0	0	0	0	0	0	0	0	0	0	0	0	0	0	0	0	0	0	0
	130	0	0	0	0	0	0	0	0	0	0	0	0	0	0	0	0	0	0	0	0									130	0	0	0	0	0	0	0	0	0	0	0	0	0	0	0	0	0	0	0
	131	0	0	0	0	0	0	0	0	0	0	0	0	0	0	0	0	0	0	0	0									131	0	0	0	0	0	0	0	0	0	0	0	0	0	0	0	0	0	0	0
	132	0	0	0	0	0	0	0	0	0	0	0	0	0	0	0	0	0	0	0	0									132	0	0	0	0	0	0	0	0	0	0	0	0	0	0	0	0	0	0	0
	133	0	0	0	0	0	0	0	0	0	0	0	0	0	0	0	0	0	0	0	0									133	0	0	0	0	0	0	0	0	0	0	0	0	0	0	0	0	0	0	0
	134	0	0	0	0	0	0	0	0	0	0	0	0	0	0	0	0	0	0	0	0									134	0	0	0	0	0	0	0	0	0	0	0	0	0	0	0	0	0	0	0
	135	0	0	0	0	0	0	0	0	0	0	0	0	0	0	0	0	0	0	0	0									135	0	0	0	0	0	0	0	0	0	0	0	0	0	0	0	0	0	0	0
	136	0	0	0	0	0	0	0	0	0	0	0	0	0	0	0	0	0	0	0	0									136	0	0	0	0	0	0	0	0	0	0	0	0	0	0	0	0	0	0	0
	137	0	0	0	0	0	0	0	0	0	0	0	0	0	0	0	0	0	0	0	0									137	0	0	0	0	0	0	0	0	0	0	0	0	0	0	0	0	0	0	0
	138	0	0	0	0	0	0	0	0	0	0	0	0	0	0	0	0	0	0	0	0									138	0	0	0	0	0	0	0	0	0	0	0	0	0	0	0	0	0	0	0
	139	0	0	0	0	0	0	0	0	0	0	0	0	0	0	0	0	0	0	0	0									139	0	0	0	0	0	0	0	0	0	0	0	0	0	0	0	0	0	0	0
	140	0	0	0	0	0	0	0	0	0	0	0	0	0	0	0	0	0	0	0	0									140	0	0	0	0	0	0	0	0	0	0	0	0	0	0	0	0	0	0	0
	141	0	0	0	0	0	0	0	0	0	0	0	0	0	0	0	0	0	0	0	0									141	0	0	0	0	0	0	0	0	0	0	0	0	0	0	0	0	0	0	0
	142	0	0	0	0	0	0	0	0	0	0	0	0	0	0	0	0	0	0	0	0									142	0	0	0	0	0	0	0	0	0	0	0	0	0	0	0	0	0	0	0
	143	0	0	0	0	0	0	0	0	0	0	0	0	0	0	0	0	0	0	0	0									143	0	0	0	0	0	0	0	0	0	0	0	0	0	0	0	0	0	0	0
	144	0	0	0	0	0	0	0	0	0	0	0	0	0	0	0	0	0	0	0	0									144	0	0	0	0	0	0	0	0	0	0	0	0	0	0	0	0	0	0	0
	145	0	0	0	0	0	0	0	0	0	0	0	0	0	0	0	0	0	0	0	0									145	0	0	0	0	0	0	0	0	0	0	0	0	0	0	0	0	0	0	0
	146	0	0	0	0	0	0	0	0	0	0	0	0	0	0	0	0	0	0	0	0									146	0	0	0	0	0	0	0	0	0	0	0	0	0	0	0	0	0	0	0
	147	0	0	0	0	0	0	0	0	0	0	0	0	0	0	0	0	0	0	0	0									147	0	0	0	0	0	0	0	0	0	0	0	0	0	0	0	0	0	0	0
	148	0	0	0	0	0	0	0	0	0	0	0	0	0	0	0	0	0	0	0	0									148	0	0	0	0	0	0	0	0	0	0	0	0	0	0	0	0	0	0	0
	149	0	0	0	0	0	0	0	0	0	0	0	0	0	0	0	0	0	0	0	0									149	0	0	0	0	0	0	0	0	0	0	0	0	0	0	0	0	0	0	0
	150	0	0	0	0	0	0	0	0	0	0	0	0	0	0	0	0	0	0	0	0									150	0	0	0	0	0	0	0	0	0	0	0	0	0	0	0	0	0	0	0
	151	0	0	0	0	0	0	0	0	0	0	0	0	0	0	0	0	0	0	0	0									151	0	0	0	0	0	0	0	0	0	0	0	0	0	0	0	0	0	0	0
	152	0	0	0	0	0	0	0	0	0	0	0	0	0	0	0	0	0	0	0	0									152	0	0	0	0	0	0	0	0	0	0	0	0	0	0	0	0	0	0	0
	153	0	0	0	0	0	0	0	0	0	0	0	0	0	0	0	0	0	0	0	0									153	0	0	0	0	0	0	0	0	0	0	0	0	0	0	0	0	0	0	0
	154	0	0	0	0	0	0	0	0	0	0	0	0	0	0	0	0	0	0	0	0									154	0	0	0	0	0	0	0	0	0	0	0	0	0	0	0	0	0	0	0
	155	0	0	0	0	0	0	0	0	0	0	0	0	0	0	0	0	0	0	0	0									155	0	0	0	0	0	0	0	0	0	0	0	0	0	0	0	0	0	0	0
	156	0	0	0	0	0	0	0	0	0	0	0	0	0	0	0	0	0	0	0	0									156	0	0	0	0	0	0	0	0	0	0	0	0	0	0	0	0	0	0	0
	157	0	0	0	0	0	0	0	0	0	0	0	0	0	0	0	0	0	0	0	0									157	0	0	0	0	0	0	0	0	0	0	0	0	0	0	0	0	0	0	0
	158	0	0	0	0	0	0	0	0	0	0	0	0	0	0	0	0	0	0	0	0									158	0	0	0	0	0	0	0	0	0	0	0	0	0	0	0	0	0	0	0
	159	0	0	0	0	0	0	0	0	0	0	0	0	0	0	0	0	0	0	0	0									159	0	0	0	0	0	0	0	0	0	0	0	0	0	0	0	0	0	0	0
	160	0	0	0	0	0	0	0	0	0	0	0	0	0	0	0	0	0	0	0	0									160	0	0	0	0	0	0	0	0	0	0	0	0	0	0	0	0	0	0	0
	161	0	0	0	0	0	0	0	0	0	0	0	0	0	0	0	0	0	0	0	0									161	0	0	0	0	0	0	0	0	0	0	0	0	0	0	0	0	0	0	0
	162	0	0	0	0	0	0	0	0	0	0	0	0	0	0	0	0	0	0	0	0									162	0	0	0	0	0	0	0	0	0	0	0	0	0	0	0	0	0	0	0
	163	0	0	0	0	0	0	0	0	0	0	0	0	0	0	0	0	0	0	0	0									163	0	0	0	0	0	0	0	0	0	0	0	0	0	0	0	0	0	0	0
	164	0	0	0	0	0	0	0	0	0	0	0	0	0	0	0	0	0	0	0	0									164	0	0	0	0	0	0	0	0	0	0	0	0	0	0	0	0	0	0	0
	165	0	0	0	0	0	0	0	0	0	0	0	0	0	0	0	0	0	0	0	0									165	0	0	0	0	0	0	0	0	0	0	0	0	0	0	0	0	0	0	0
	166	0	0	0	0	0	0	0	0	0	0	0	0	0	0	0	0	0	0	0	0									166	0	0	0	0	0	0	0	0	0	0	0	0	0	0	0	0	0	0	0
	167	0	0	0	0	0	0	0	0	0	0	0	0	0	0	0	0	0	0	0	0									167	0	0	0	0	0	0	0	0	0	0	0	0	0	0	0	0	0	0	0
	168	0	0	0	0	0	0	0	0	0	0	0	0	0	0	0	0	0	0	0	0									168	0	0	0	0	0	0	0	0	0	0	0	0	0	0	0	0	0	0	0
	169	0	0	0	0	0	0	0	0	0	0	0	0	0	0	0	0	0	0	0	0									169	0	0	0	0	0	0	0	0	0	0	0	0	0	0	0	0	0	0	0
	170	0	0	0	0	0	0	0	0	0	0	0	0	0	0	0	0	0	0	0	0									170	0	0	0	0	0	0	0	0	0	0	0	0	0	0	0	0	0	0	0
	171	0	0	0	0	0	0	0	0	0	0	0	0	0	0	0	0	0	0	0	0									171	0	0	0	0	0	0	0	0	0	0	0	0	0	0	0	0	0	0	0
	172	0	0	0	0	0	0	0	0	0	0	0	0	0	0	0	0	0	0	0	0									172	0	0	0	0	0	0	0	0	0	0	0	0	0	0	0	0	0	0	0
	173	0	0	0	0	0	0	0	0	0	0	0	0	0	0	0	0	0	0	0	0									173	0	0	0	0	0	0	0	0	0	0	0	0	0	0	0	0	0	0	0
	174	0	0	0	0	0	0	0	0	0	0	0	0	0	0	0	0	0	0	0	0									174	0	0	0	0	0	0	0	0	0	0	0	0	0	0	0	0	0	0	0
	175	0	0	0	0	0	0	0	0	0	0	0	0	0	0	0	0	0	0	0	0									175	0	0	0	0	0	0	0	0	0	0	0	0	0	0	0	0	0	0	0
	176	0	0	0	0	0	0	0	0	0	0	0	0	0	0	0	0	0	0	0	0									176	0	0	0	0	0	0	0	0	0	0	0	0	0	0	0	0	0	0	0
	177	0	0	0	0	0	0	0	0	0	0	0	0	0	0	0	0	0	0	0	0									177	0	0	0	0	0	0	0	0	0	0	0	0	0	0	0	0	0	0	0
	178	0	0	0	0	0	0	0	0	0	0	0	0	0	0	0	0	0	0	0	0									178	0	0	0	0	0	0	0	0	0	0	0	0	0	0	0	0	0	0	0
	179	0	0	0	0	0	0	0	0	0	0	0	0	0	0	0	0	0	0	0	0									179	0	0	0	0	0	0	0	0	0	0	0	0	0	0	0	0	0	0	0
	180	0	0	0	0	0	0	0	0	0	0	0	0	0	0	0	0	0	0	0	0									180	0	0	0	0	0	0	0	0	0	0	0	0	0	0	0	0	0	0	0
	181	0	0	0	0	0	0	0	0	0	0	0	0	0	0	0	0	0	0	0	0									181	0	0	0	0	0	0	0	0	0	0	0	0	0	0	0	0	0	0	0
	182	0	0	0	0	0	0	0	0	0	0	0	0	0	0	0	0	0	0	0	0									182	0	0	0	0	0	0	0	0	0	0	0	0	0	0	0	0	0	0	0
	183	0	0	0	0	0	0	0	0	0	0	0	0	0	0	0	0	0	0	0	0									183	0	0	0	0	0	0	0	0	0	0	0	0	0	0	0	0	0	0	0
	184	0	0	0	0	0	0	0	0	0	0	0	0	0	0	0	0	0	0	0	0									184	0	0	0	0	0	0	0	0	0	0	0	0	0	0	0	0	0	0	0
	185	0	0	0	0	0	0	0	0	0	0	0	0	0	0	0	0	0	0	0	0									185	0	0	0	0	0	0	0	0	0	0	0	0	0	0	0	0	0	0	0
	186	0	0	0	0	0	0	0	0	0	0	0	0	0	0	0	0	0	0	0	0									186	0	0	0	0	0	0	0	0	0	0	0	0	0	0	0	0	0	0	0
	187	0	0	0	0	0	0	0	0	0	0	0	0	0	0	0	0	0	0	0	0									187	0	0	0	0	0	0	0	0	0	0	0	0	0	0	0	0	0	0	0
	188	0	0	0	0	0	0	0	0	0	0	0	0	0	0	0	0	0	0	0	0									188	0	0	0	0	0	0	0	0	0	0	0	0	0	0	0	0	0	0	0
	189	0	0	0	0	0	0	0	0	0	0	0	0	0	0	0	0	0	0	0	0									189	0	0	0	0	0	0	0	0	0	0	0	0	0	0	0	0	0	0	0
	190	0	0	0	0	0	0	0	0	0	0	0	0	0	0	0	0	0	0	0	0									190	0	0	0	0	0	0	0	0	0	0	0	0	0	0	0	0	0	0	0
	191	0	0	0	0	0	0	0	0	0	0	0	0	0	0	0	0	0	0	0	0									191	0	0	0	0	0	0	0	0	0	0	0	0	0	0	0	0	0	0	0
	192	0	0	0	0	0	0	0	0	0	0	0	0	0	0	0	0	0	0	0	0									192	0	0	0	0	0	0	0	0	0	0	0	0	0	0	0	0	0	0	0
	193	0	0	0	0	0	0	0	0	0	0	0	0	0	0	0	0	0	0	0	0									193	0	0	0	0	0	0	0	0	0	0	0	0	0	0	0	0	0	0	0
	194	0	0	0	0	0	0	0	0	0	0	0	0	0	0	0	0	0	0	0	0									194	0	0	0	0	0	0	0	0	0	0	0	0	0	0	0	0	0	0	0
	195	0	0	0	0	0	0	0	0	0	0	0	0	0	0	0	0	0	0	0	0									195	0	0	0	0	0	0	0	0	0	0	0	0	0	0	0	0	0	0	0
	196	0	0	0	0	0	0	0	0	0	0	0	0	0	0	0	0	0	0	0	0									196	0	0	0	0	0	0	0	0	0	0	0	0	0	0	0	0	0	0	0
	197	0	0	0	0	0	0	0	0	0	0	0	0	0	0	0	0	0	0	0	0									197	0	0	0	0	0	0	0	0	0	0	0	0	0	0	0	0	0	0	0
	198	0	0	0	0	0	0	0	0	0	0	0	0	0	0	0	0	0	0	0	0									198	0	0	0	0	0	0	0	0	0	0	0	0	0	0	0	0	0	0	0
	199	0	0	0	0	0	0	0	0	0	0	0	0	0	0	0	0	0	0	0	0									199	0	0	0	0	0	0	0	0	0	0	0	0	0	0	0	0	0	0	0
	200	0	0	0	0	0	0	0	0	0	0	0	0	0	0	0	0	0	0	0	0									200	0	0	0	0	0	0	0	0	0	0	0	0	0	0	0	0	0	0	0
	201	0	0	0	0	0	0	0	0	0	0	0	0	0	0	0	0	0	0	0	0									201	0	0	0	0	0	0	0	0	0	0	0	0	0	0	0	0	0	0	0
	202	0	0	0	0	0	0	0	0	0	0	0	0	0	0	0	0	0	0	0	0									202	0	0	0	0	0	0	0	0	0	0	0	0	0	0	0	0	0	0	0
	203	0	0	0	0	0	0	0	0	0	0	0	0	0	0	0	0	0	0	0	0									203	0	0	0	0	0	0	0	0	0	0	0	0	0	0	0	0	0	0	0
	204	0	0	0	0	0	0	0	0	0	0	0	0	0	0	0	0	0	0	0	0									204	0	0	0	0	0	0	0	0	0	0	0	0	0	0	0	0	0	0	0
	205	0	0	0	0	0	0	0	0	0	0	0	0	0	0	0	0	0	0	0	0									205	0	0	0	0	0	0	0	0	0	0	0	0	0	0	0	0	0	0	0
	206	0	0	0	0	0	0	0	0	0	0	0	0	0	0	0	0	0	0	0	0									206	0	0	0	0	0	0	0	0	0	0	0	0	0	0	0	0	0	0	0
	207	0	0	0	0	0	0	0	0	0	0	0	0	0	0	0	0	0	0	0	0									207	0	0	0	0	0	0	0	0	0	0	0	0	0	0	0	0	0	0	0
	208	0	0	0	0	0	0	0	0	0	0	0	0	0	0	0	0	0	0	0	0									208	0	0	0	0	0	0	0	0	0	0	0	0	0	0	0	0	0	0	0
	209	0	0	0	0	0	0	0	0	0	0	0	0	0	0	0	0	0	0	0	0									209	0	0	0	0	0	0	0	0	0	0	0	0	0	0	0	0	0	0	0
	210	0	0	0	0	0	0	0	0	0	0	0	0	0	0	0	0	0	0	0	0									210	0	0	0	0	0	0	0	0	0	0	0	0	0	0	0	0	0	0	0
	211	0	0	0	0	0	0	0	0	0	0	0	0	0	0	0	0	0	0	0	0									211	0	0	0	0	0	0	0	0	0	0	0	0	0	0	0	0	0	0	0
	212	0	0	0	0	0	0	0	0	0	0	0	0	0	0	0	0	0	0	0	0									212	0	0	0	0	0	0	0	0	0	0	0	0	0	0	0	0	0	0	0
	213	0	0	0	0	0	0	0	0	0	0	0	0	0	0	0	0	0	0	0	0									213	0	0	0	0	0	0	0	0	0	0	0	0	0	0	0	0	0	0	0
	214	0	0	0	0	0	0	0	0	0	0	0	0	0	0	0	0	0	0	0	0									214	0	0	0	0	0	0	0	0	0	0	0	0	0	0	0	0	0	0	0
	215	0	0	0	0	0	0	0	0	0	0	0	0	0	0	0	0	0	0	0	0									215	0	0	0	0	0	0	0	0	0	0	0	0	0	0	0	0	0	0	0
	216	0	0	0	0	0	0	0	0	0	0	0	0	0	0	0	0	0	0	0	0									216	0	0	0	0	0	0	0	0	0	0	0	0	0	0	0	0	0	0	0
	217	0	0	0	0	0	0	0	0	0	0	0	0	0	0	0	0	0	0	0	0									217	0	0	0	0	0	0	0	0	0	0	0	0	0	0	0	0	0	0	0
	218	0	0	0	0	0	0	0	0	0	0	0	0	0	0	0	0	0	0	0	0									218	0	0	0	0	0	0	0	0	0	0	0	0	0	0	0	0	0	0	0
	219	0	0	0	0	0	0	0	0	0	0	0	0	0	0	0	0	0	0	0	0									219	0	0	0	0	0	0	0	0	0	0	0	0	0	0	0	0	0	0	0
	220	0	0	0	0	0	0	0	0	0	0	0	0	0	0	0	0	0	0	0	0									220	0	0	0	0	0	0	0	0	0	0	0	0	0	0	0	0	0	0	0
	221	0	0	0	0	0	0	0	0	0	0	0	0	0	0	0	0	0	0	0	0									221	0	0	0	0	0	0	0	0	0	0	0	0	0	0	0	0	0	0	0
	222	0	0	0	0	0	0	0	0	0	0	0	0	0	0	0	0	0	0	0	0									222	0	0	0	0	0	0	0	0	0	0	0	0	0	0	0	0	0	0	0
	223	0	0	0	0	0	0	0	0	0	0	0	0	0	0	0	0	0	0	0	0									223	0	0	0	0	0	0	0	0	0	0	0	0	0	0	0	0	0	0	0
	224	0	0	0	0	0	0	0	0	0	0	0	0	0	0	0	0	0	0	0	0									224	0	0	0	0	0	0	0	0	0	0	0	0	0	0	0	0	0	0	0
	225	0	0	0	0	0	0	0	0	0	0	0	0	0	0	0	0	0	0	0	0									225	0	0	0	0	0	0	0	0	0	0	0	0	0	0	0	0	0	0	0
	226	0	0	0	0	0	0	0	0	0	0	0	0	0	0	0	0	0	0	0	0									226	0	0	0	0	0	0	0	0	0	0	0	0	0	0	0	0	0	0	0
	227	0	0	0	0	0	0	0	0	0	0	0	0	0	0	0	0	0	0	0	0									227	0	0	0	0	0	0	0	0	0	0	0	0	0	0	0	0	0	0	0
	228	0	0	0	0	0	0	0	0	0	0	0	0	0	0	0	0	0	0	0	0									228	0	0	0	0	0	0	0	0	0	0	0	0	0	0	0	0	0	0	0
	229	0	0	0	0	0	0	0	0	0	0	0	0	0	0	0	0	0	0	0	0									229	0	0	0	0	0	0	0	0	0	0	0	0	0	0	0	0	0	0	0
	230	0	0	0	0	0	0	0	0	0	0	0	0	0	0	0	0	0	0	0	0									230	0	0	0	0	0	0	0	0	0	0	0	0	0	0	0	0	0	0	0
	231	0	0	0	0	0	0	0	0	0	0	0	0	0	0	0	0	0	0	0	0									231	0	0	0	0	0	0	0	0	0	0	0	0	0	0	0	0	0	0	0
	232	0	0	0	0	0	0	0	0	0	0	0	0	0	0	0	0	0	0	0	0									232	0	0	0	0	0	0	0	0	0	0	0	0	0	0	0	0	0	0	0
	233	0	0	0	0	0	0	0	0	0	0	0	0	0	0	0	0	0	0	0	0									233	0	0	0	0	0	0	0	0	0	0	0	0	0	0	0	0	0	0	0
	234	0	0	0	0	0	0	0	0	0	0	0	0	0	0	0	0	0	0	0	0									234	0	0	0	0	0	0	0	0	0	0	0	0	0	0	0	0	0	0	0
	235	0	0	0	0	0	0	0	0	0	0	0	0	0	0	0	0	0	0	0	0									235	0	0	0	0	0	0	0	0	0	0	0	0	0	0	0	0	0	0	0
	236	0	0	0	0	0	0	0	0	0	0	0	0	0	0	0	0	0	0	0	0									236	0	0	0	0	0	0	0	0	0	0	0	0	0	0	0	0	0	0	0
	237	0	0	0	0	0	0	0	0	0	0	0	0	0	0	0	0	0	0	0	0									237	0	0	0	0	0	0	0	0	0	0	0	0	0	0	0	0	0	0	0
	238	0	0	0	0	0	0	0	0	0	0	0	0	0	0	0	0	0	0	0	0									238	0	0	0	0	0	0	0	0	0	0	0	0	0	0	0	0	0	0	0
	239	0	0	0	0	0	0	0	0	0	0	0	0	0	0	0	0	0	0	0	0									239	0	0	0	0	0	0	0	0	0	0	0	0	0	0	0	0	0	0	0
	240	0	0	0	0	0	0	0	0	0	0	0	0	0	0	0	0	0	0	0	0									240	0	0	0	0	0	0	0	0	0	0	0	0	0	0	0	0	0	0	0
	241	0	0	0	0	0	0	0	0	0	0	0	0	0	0	0	0	0	0	0	0									241	0	0	0	0	0	0	0	0	0	0	0	0	0	0	0	0	0	0	0
	242	0	0	0	0	0	0	0	0	0	0	0	0	0	0	0	0	0	0	0	0									242	0	0	0	0	0	0	0	0	0	0	0	0	0	0	0	0	0	0	0
	243	0	0	0	0	0	0	0	0	0	0	0	0	0	0	0	0	0	0	0	0									243	0	0	0	0	0	0	0	0	0	0	0	0	0	0	0	0	0	0	0
	244	0	0	0	0	0	0	0	0	0	0	0	0	0	0	0	0	0	0	0	0									244	0	0	0	0	0	0	0	0	0	0	0	0	0	0	0	0	0	0	0
	245	0	0	0	0	0	0	0	0	0	0	0	0	0	0	0	0	0	0	0	0									245	0	0	0	0	0	0	0	0	0	0	0	0	0	0	0	0	0	0	0
	246	0	0	0	0	0	0	0	0	0	0	0	0	0	0	0	0	0	0	0	0									246	0	0	0	0	0	0	0	0	0	0	0	0	0	0	0	0	0	0	0
	247	0	0	0	0	0	0	0	0	0	0	0	0	0	0	0	0	0	0	0	0									247	0	0	0	0	0	0	0	0	0	0	0	0	0	0	0	0	0	0	0
	248	0	0	0	0	0	0	0	0	0	0	0	0	0	0	0	0	0	0	0	0									248	0	0	0	0	0	0	0	0	0	0	0	0	0	0	0	0	0	0	0
	249	0	0	0	0	0	0	0	0	0	0	0	0	0	0	0	0	0	0	0	0									249	0	0	0	0	0	0	0	0	0	0	0	0	0	0	0	0	0	0	0
	250	0	0	0	0	0	0	0	0	0	0	0	0	0	0	0	0	0	0	0	0									250	0	0	0	0	0	0	0	0	0	0	0	0	0	0	0	0	0	0	0
	251	0	0	0	0	0	0	0	0	0	0	0	0	0	0	0	0	0	0	0	0									251	0	0	0	0	0	0	0	0	0	0	0	0	0	0	0	0	0	0	0
	252	0	0	0	0	0	0	0	0	0	0	0	0	0	0	0	0	0	0	0	0									252	0	0	0	0	0	0	0	0	0	0	0	0	0	0	0	0	0	0	0
	253	0	0	0	0	0	0	0	0	0	0	0	0	0	0	0	0	0	0	0	0									253	0	0	0	0	0	0	0	0	0	0	0	0	0	0	0	0	0	0	0
	254	0	0	0	0	0	0	0	0	0	0	0	0	0	0	0	0	0	0	0	0									254	0	0	0	0	0	0	0	0	0	0	0	0	0	0	0	0	0	0	0
	255	0	0	0	0	0	0	0	0	0	0	0	0	0	0	0	0	0	0	0	0									255	0	0	0	0	0	0	0	0	0	0	0	0	0	0	0	0	0	0	0
	256	0	0	0	0	0	0	0	0	0	0	0	0	0	0	0	0	0	0	0	0									256	0	0	0	0	0	0	0	0	0	0	0	0	0	0	0	0	0	0	0
	257	0	0	0	0	0	0	0	0	0	0	0	0	0	0	0	0	0	0	0	0									257	0	0	0	0	0	0	0	0	0	0	0	0	0	0	0	0	0	0	0
	258	0	0	0	0	0	0	0	0	0	0	0	0	0	0	0	0	0	0	0	0									258	0	0	0	0	0	0	0	0	0	0	0	0	0	0	0	0	0	0	0
	259	0	0	0	0	0	0	0	0	0	0	0	0	0	0	0	0	0	0	0	0									259	0	0	0	0	0	0	0	0	0	0	0	0	0	0	0	0	0	0	0
	260	0	0	0	0	0	0	0	0	0	0	0	0	0	0	0	0	0	0	0	0									260	0	0	0	0	0	0	0	0	0	0	0	0	0	0	0	0	0	0	0
	261	0	0	0	0	0	0	0	0	0	0	0	0	0	0	0	0	0	0	0	0									261	0	0	0	0	0	0	0	0	0	0	0	0	0	0	0	0	0	0	0
	262	0	0	0	0	0	0	0	0	0	0	0	0	0	0	0	0	0	0	0	0									262	0	0	0	0	0	0	0	0	0	0	0	0	0	0	0	0	0	0	0
	263	0	0	0	0	0	0	0	0	0	0	0	0	0	0	0	0	0	0	0	0									263	0	0	0	0	0	0	0	0	0	0	0	0	0	0	0	0	0	0	0
	264	0	0	0	0	0	0	0	0	0	0	0	0	0	0	0	0	0	0	0	0									264	0	0	0	0	0	0	0	0	0	0	0	0	0	0	0	0	0	0	0
	265	0	0	0	0	0	0	0	0	0	0	0	0	0	0	0	0	0	0	0	0									265	0	0	0	0	0	0	0	0	0	0	0	0	0	0	0	0	0	0	0
	266	0	0	0	0	0	0	0	0	0	0	0	0	0	0	0	0	0	0	0	0									266	0	0	0	0	0	0	0	0	0	0	0	0	0	0	0	0	0	0	0
	267	0	0	0	0	0	0	0	0	0	0	0	0	0	0	0	0	0	0	0	0									267	0	0	0	0	0	0	0	0	0	0	0	0	0	0	0	0	0	0	0
	268	0	0	0	0	0	0	0	0	0	0	0	0	0	0	0	0	0	0	0	0									268	0	0	0	0	0	0	0	0	0	0	0	0	0	0	0	0	0	0	0
	269	0	0	0	0	0	0	0	0	0	0	0	0	0	0	0	0	0	0	0	0									269	0	0	0	0	0	0	0	0	0	0	0	0	0	0	0	0	0	0	0
	270	0	0	0	0	0	0	0	0	0	0	0	0	0	0	0	0	0	0	0	0									270	0	0	0	0	0	0	0	0	0	0	0	0	0	0	0	0	0	0	0
	271	0	0	0	0	0	0	0	0	0	0	0	0	0	0	0	0	0	0	0	0									271	0	0	0	0	0	0	0	0	0	0	0	0	0	0	0	0	0	0	0
	272	0	0	0	0	0	0	0	0	0	0	0	0	0	0	0	0	0	0	0	0									272	0	0	0	0	0	0	0	0	0	0	0	0	0	0	0	0	0	0	0
	273	0	0	0	0	0	0	0	0	0	0	0	0	0	0	0	0	0	0	0	0									273	0	0	0	0	0	0	0	0	0	0	0	0	0	0	0	0	0	0	0
	274	0	0	0	0	0	0	0	0	0	0	0	0	0	0	0	0	0	0	0	0									274	0	0	0	0	0	0	0	0	0	0	0	0	0	0	0	0	0	0	0
	275	0	0	0	0	0	0	0	0	0	0	0	0	0	0	0	0	0	0	0	0									275	0	0	0	0	0	0	0	0	0	0	0	0	0	0	0	0	0	0	0
	276	0	0	0	0	0	0	0	0	0	0	0	0	0	0	0	0	0	0	0	0									276	0	0	0	0	0	0	0	0	0	0	0	0	0	0	0	0	0	0	0
	277	0	0	0	0	0	0	0	0	0	0	0	0	0	0	0	0	0	0	0	0									277	0	0	0	0	0	0	0	0	0	0	0	0	0	0	0	0	0	0	0
	278	0	0	0	0	0	0	0	0	0	0	0	0	0	0	0	0	0	0	0	0									278	0	0	0	0	0	0	0	0	0	0	0	0	0	0	0	0	0	0	0
	279	0	0	0	0	0	0	0	0	0	0	0	0	0	0	0	0	0	0	0	0									279	0	0	0	0	0	0	0	0	0	0	0	0	0	0	0	0	0	0	0
	280	0	0	0	0	0	0	0	0	0	0	0	0	0	0	0	0	0	0	0	0									280	0	0	0	0	0	0	0	0	0	0	0	0	0	0	0	0	0	0	0
	281	0	0	0	0	0	0	0	0	0	0	0	0	0	0	0	0	0	0	0	0									281	0	0	0	0	0	0	0	0	0	0	0	0	0	0	0	0	0	0	0
	282	0	0	0	0	0	0	0	0	0	0	0	0	0	0	0	0	0	0	0	0									282	0	0	0	0	0	0	0	0	0	0	0	0	0	0	0	0	0	0	0
	283	0	0	0	0	0	0	0	0	0	0	0	0	0	0	0	0	0	0	0	0									283	0	0	0	0	0	0	0	0	0	0	0	0	0	0	0	0	0	0	0
	284	0	0	0	0	0	0	0	0	0	0	0	0	0	0	0	0	0	0	0	0									284	0	0	0	0	0	0	0	0	0	0	0	0	0	0	0	0	0	0	0
	285	0	0	0	0	0	0	0	0	0	0	0	0	0	0	0	0	0	0	0	0									285	0	0	0	0	0	0	0	0	0	0	0	0	0	0	0	0	0	0	0
	286	0	0	0	0	0	0	0	0	0	0	0	0	0	0	0	0	0	0	0	0									286	0	0	0	0	0	0	0	0	0	0	0	0	0	0	0	0	0	0	0
	287	0	0	0	0	0	0	0	0	0	0	0	0	0	0	0	0	0	0	0	0									287	0	0	0	0	0	0	0	0	0	0	0	0	0	0	0	0	0	0	0
	288	0	0	0	0	0	0	0	0	0	0	0	0	0	0	0	0	0	0	0	0									288	0	0	0	0	0	0	0	0	0	0	0	0	0	0	0	0	0	0	0
	289	0	0	0	0	0	0	0	0	0	0	0	0	0	0	0	0	0	0	0	0									289	0	0	0	0	0	0	0	0	0	0	0	0	0	0	0	0	0	0	0
	290	0	0	0	0	0	0	0	0	0	0	0	0	0	0	0	0	0	0	0	0									290	0	0	0	0	0	0	0	0	0	0	0	0	0	0	0	0	0	0	0
	291	0	0	0	0	0	0	0	0	0	0	0	0	0	0	0	0	0	0	0	0									291	0	0	0	0	0	0	0	0	0	0	0	0	0	0	0	0	0	0	0
	292	0	0	0	0	0	0	0	0	0	0	0	0	0	0	0	0	0	0	0	0									292	0	0	0	0	0	0	0	0	0	0	0	0	0	0	0	0	0	0	0
	293	0	0	0	0	0	0	0	0	0	0	0	0	0	0	0	0	0	0	0	0									293	0	0	0	0	0	0	0	0	0	0	0	0	0	0	0	0	0	0	0
	294	0	0	0	0	0	0	0	0	0	0	0	0	0	0	0	0	0	0	0	0									294	0	0	0	0	0	0	0	0	0	0	0	0	0	0	0	0	0	0	0
	295	0	0	0	0	0	0	0	0	0	0	0	0	0	0	0	0	0	0	0	0									295	0	0	0	0	0	0	0	0	0	0	0	0	0	0	0	0	0	0	0
	296	0	0	0	0	0	0	0	0	0	0	0	0	0	0	0	0	0	0	0	0									296	0	0	0	0	0	0	0	0	0	0	0	0	0	0	0	0	0	0	0
	297	0	0	0	0	0	0	0	0	0	0	0	0	0	0	0	0	0	0	0	0									297	0	0	0	0	0	0	0	0	0	0	0	0	0	0	0	0	0	0	0
	298	0	0	0	0	0	0	0	0	0	0	0	0	0	0	0	0	0	0	0	0									298	0	0	0	0	0	0	0	0	0	0	0	0	0	0	0	0	0	0	0
	299	0	0	0	0	0	0	0	0	0	0	0	0	0	0	0	0	0	0	0	0									299	0	0	0	0	0	0	0	0	0	0	0	0	0	0	0	0	0	0	0
	300	0	0	0	0	0	0	0	0	0	0	0	0	0	0	0	0	0	0	0	0									300	0	0	0	0	0	0	0	0	0	0	0	0	0	0	0	0	0	0	0
	301	0	0	0	0	0	0	0	0	0	0	0	0	0	0	0	0	0	0	0	0									301	0	0	0	0	0	0	0	0	0	0	0	0	0	0	0	0	0	0	0
	302	0	0	0	0	0	0	0	0	0	0	0	0	0	0	0	0	0	0	0	0									302	0	0	0	0	0	0	0	0	0	0	0	0	0	0	0	0	0	0	0
	303	0	0	0	0	0	0	0	0	0	0	0	0	0	0	0	0	0	0	0	0									303	0	0	0	0	0	0	0	0	0	0	0	0	0	0	0	0	0	0	0
	304	0	0	0	0	0	0	0	0	0	0	0	0	0	0	0	0	0	0	0	0									304	0	0	0	0	0	0	0	0	0	0	0	0	0	0	0	0	0	0	0
	305	0	0	0	0	0	0	0	0	0	0	0	0	0	0	0	0	0	0	0	0									305	0	0	0	0	0	0	0	0	0	0	0	0	0	0	0	0	0	0	0
	306	0	0	0	0	0	0	0	0	0	0	0	0	0	0	0	0	0	0	0	0									306	0	0	0	0	0	0	0	0	0	0	0	0	0	0	0	0	0	0	0
	307	0	0	0	0	0	0	0	0	0	0	0	0	0	0	0	0	0	0	0	0									307	0	0	0	0	0	0	0	0	0	0	0	0	0	0	0	0	0	0	0
	308	0	0	0	0	0	0	0	0	0	0	0	0	0	0	0	0	0	0	0	0									308	0	0	0	0	0	0	0	0	0	0	0	0	0	0	0	0	0	0	0
	309	0	0	0	0	0	0	0	0	0	0	0	0	0	0	0	0	0	0	0	0									309	0	0	0	0	0	0	0	0	0	0	0	0	0	0	0	0	0	0	0
	310	0	0	0	0	0	0	0	0	0	0	0	0	0	0	0	0	0	0	0	0									310	0	0	0	0	0	0	0	0	0	0	0	0	0	0	0	0	0	0	0
	311	0	0	0	0	0	0	0	0	0	0	0	0	0	0	0	0	0	0	0	0									311	0	0	0	0	0	0	0	0	0	0	0	0	0	0	0	0	0	0	0
	312	0	0	0	0	0	0	0	0	0	0	0	0	0	0	0	0	0	0	0	0									312	0	0	0	0	0	0	0	0	0	0	0	0	0	0	0	0	0	0	0
	313	0	0	0	0	0	0	0	0	0	0	0	0	0	0	0	0	0	0	0	0									313	0	0	0	0	0	0	0	0	0	0	0	0	0	0	0	0	0	0	0
	314	0	0	0	0	0	0	0	0	0	0	0	0	0	0	0	0	0	0	0	0									314	0	0	0	0	0	0	0	0	0	0	0	0	0	0	0	0	0	0	0
	315	0	0	0	0	0	0	0	0	0	0	0	0	0	0	0	0	0	0	0	0									315	0	0	0	0	0	0	0	0	0	0	0	0	0	0	0	0	0	0	0
	316	0	0	0	0	0	0	0	0	0	0	0	0	0	0	0	0	0	0	0	0									316	0	0	0	0	0	0	0	0	0	0	0	0	0	0	0	0	0	0	0
	317	0	0	0	0	0	0	0	0	0	0	0	0	0	0	0	0	0	0	0	0									317	0	0	0	0	0	0	0	0	0	0	0	0	0	0	0	0	0	0	0
	318	0	0	0	0	0	0	0	0	0	0	0	0	0	0	0	0	0	0	0	0									318	0	0	0	0	0	0	0	0	0	0	0	0	0	0	0	0	0	0	0
	319	0	0	0	0	0	0	0	0	0	0	0	0	0	0	0	0	0	0	0	0									319	0	0	0	0	0	0	0	0	0	0	0	0	0	0	0	0	0	0	0
	320	0	0	0	0	0	0	0	0	0	0	0	0	0	0	0	0	0	0	0	0									320	0	0	0	0	0	0	0	0	0	0	0	0	0	0	0	0	0	0	0
	321	0	0	0	0	0	0	0	0	0	0	0	0	0	0	0	0	0	0	0	0									321	0	0	0	0	0	0	0	0	0	0	0	0	0	0	0	0	0	0	0
	322	0	0	0	0	0	0	0	0	0	0	0	0	0	0	0	0	0	0	0	0									322	0	0	0	0	0	0	0	0	0	0	0	0	0	0	0	0	0	0	0
	323	0	0	0	0	0	0	0	0	0	0	0	0	0	0	0	0	0	0	0	0									323	0	0	0	0	0	0	0	0	0	0	0	0	0	0	0	0	0	0	0
	324	0	0	0	0	0	0	0	0	0	0	0	0	0	0	0	0	0	0	0	0									324	0	0	0	0	0	0	0	0	0	0	0	0	0	0	0	0	0	0	0
	325	0	0	0	0	0	0	0	0	0	0	0	0	0	0	0	0	0	0	0	0									325	0	0	0	0	0	0	0	0	0	0	0	0	0	0	0	0	0	0	0
	326	0	0	0	0	0	0	0	0	0	0	0	0	0	0	0	0	0	0	0	0									326	0	0	0	0	0	0	0	0	0	0	0	0	0	0	0	0	0	0	0
	327	0	0	0	0	0	0	0	0	0	0	0	0	0	0	0	0	0	0	0	0									327	0	0	0	0	0	0	0	0	0	0	0	0	0	0	0	0	0	0	0
	328	0	0	0	0	0	0	0	0	0	0	0	0	0	0	0	0	0	0	0	0									328	0	0	0	0	0	0	0	0	0	0	0	0	0	0	0	0	0	0	0
	329	0	0	0	0	0	0	0	0	0	0	0	0	0	0	0	0	0	0	0	0									329	0	0	0	0	0	0	0	0	0	0	0	0	0	0	0	0	0	0	0
	330	0	0	0	0	0	0	0	0	0	0	0	0	0	0	0	0	0	0	0	0									330	0	0	0	0	0	0	0	0	0	0	0	0	0	0	0	0	0	0	0
	331	0	0	0	0	0	0	0	0	0	0	0	0	0	0	0	0	0	0	0	0									331	0	0	0	0	0	0	0	0	0	0	0	0	0	0	0	0	0	0	0
	332	0	0	0	0	0	0	0	0	0	0	0	0	0	0	0	0	0	0	0	0									332	0	0	0	0	0	0	0	0	0	0	0	0	0	0	0	0	0	0	0
	333	0	0	0	0	0	0	0	0	0	0	0	0	0	0	0	0	0	0	0	0									333	0	0	0	0	0	0	0	0	0	0	0	0	0	0	0	0	0	0	0
	334	0	0	0	0	0	0	0	0	0	0	0	0	0	0	0	0	0	0	0	0									334	0	0	0	0	0	0	0	0	0	0	0	0	0	0	0	0	0	0	0
	335	0	0	0	0	0	0	0	0	0	0	0	0	0	0	0	0	0	0	0	0									335	0	0	0	0	0	0	0	0	0	0	0	0	0	0	0	0	0	0	0
	336	0	0	0	0	0	0	0	0	0	0	0	0	0	0	0	0	0	0	0	0									336	0	0	0	0	0	0	0	0	0	0	0	0	0	0	0	0	0	0	0
	337	0	0	0	0	0	0	0	0	0	0	0	0	0	0	0	0	0	0	0	0									337	0	0	0	0	0	0	0	0	0	0	0	0	0	0	0	0	0	0	0
	338	0	0	0	0	0	0	0	0	0	0	0	0	0	0	0	0	0	0	0	0									338	0	0	0	0	0	0	0	0	0	0	0	0	0	0	0	0	0	0	0
	339	0	0	0	0	0	0	0	0	0	0	0	0	0	0	0	0	0	0	0	0									339	0	0	0	0	0	0	0	0	0	0	0	0	0	0	0	0	0	0	0
	340	0	0	0	0	0	0	0	0	0	0	0	0	0	0	0	0	0	0	0	0									340	0	0	0	0	0	0	0	0	0	0	0	0	0	0	0	0	0	0	0
	341	0	0	0	0	0	0	0	0	0	0	0	0	0	0	0	0	0	0	0	0									341	0	0	0	0	0	0	0	0	0	0	0	0	0	0	0	0	0	0	0
	342	0	0	0	0	0	0	0	0	0	0	0	0	0	0	0	0	0	0	0	0									342	0	0	0	0	0	0	0	0	0	0	0	0	0	0	0	0	0	0	0
	343	0	0	0	0	0	0	0	0	0	0	0	0	0	0	0	0	0	0	0	0									343	0	0	0	0	0	0	0	0	0	0	0	0	0	0	0	0	0	0	0
	344	0	0	0	0	0	0	0	0	0	0	0	0	0	0	0	0	0	0	0	0									344	0	0	0	0	0	0	0	0	0	0	0	0	0	0	0	0	0	0	0
	345	0	0	0	0	0	0	0	0	0	0	0	0	0	0	0	0	0	0	0	0									345	0	0	0	0	0	0	0	0	0	0	0	0	0	0	0	0	0	0	0
	346	0	0	0	0	0	0	0	0	0	0	0	0	0	0	0	0	0	0	0	0									346	0	0	0	0	0	0	0	0	0	0	0	0	0	0	0	0	0	0	0
	347	0	0	0	0	0	0	0	0	0	0	0	0	0	0	0	0	0	0	0	0									347	0	0	0	0	0	0	0	0	0	0	0	0	0	0	0	0	0	0	0
	348	0	0	0	0	0	0	0	0	0	0	0	0	0	0	0	0	0	0	0	0									348	0	0	0	0	0	0	0	0	0	0	0	0	0	0	0	0	0	0	0
	349	0	0	0	0	0	0	0	0	0	0	0	0	0	0	0	0	0	0	0	0									349	0	0	0	0	0	0	0	0	0	0	0	0	0	0	0	0	0	0	0
	350	0	0	0	0	0	0	0	0	0	0	0	0	0	0	0	0	0	0	0	0									350	0	0	0	0	0	0	0	0	0	0	0	0	0	0	0	0	0	0	0
	351	0	0	0	0	0	0	0	0	0	0	0	0	0	0	0	0	0	0	0	0									351	0	0	0	0	0	0	0	0	0	0	0	0	0	0	0	0	0	0	0
	352	0	0	0	0	0	0	0	0	0	0	0	0	0	0	0	0	0	0	0	0									352	0	0	0	0	0	0	0	0	0	0	0	0	0	0	0	0	0	0	0
	353	0	0	0	0	0	0	0	0	0	0	0	0	0	0	0	0	0	0	0	0									353	0	0	0	0	0	0	0	0	0	0	0	0	0	0	0	0	0	0	0
	354	0	0	0	0	0	0	0	0	0	0	0	0	0	0	0	0	0	0	0	0									354	0	0	0	0	0	0	0	0	0	0	0	0	0	0	0	0	0	0	0
	355	0	0	0	0	0	0	0	0	0	0	0	0	0	0	0	0	0	0	0	0									355	0	0	0	0	0	0	0	0	0	0	0	0	0	0	0	0	0	0	0
	356	0	0	0	0	0	0	0	0	0	0	0	0	0	0	0	0	0	0	0	0									356	0	0	0	0	0	0	0	0	0	0	0	0	0	0	0	0	0	0	0
	357	0	0	0	0	0	0	0	0	0	0	0	0	0	0	0	0	0	0	0	0									357	0	0	0	0	0	0	0	0	0	0	0	0	0	0	0	0	0	0	0
	358	0	0	0	0	0	0	0	0	0	0	0	0	0	0	0	0	0	0	0	0									358	0	0	0	0	0	0	0	0	0	0	0	0	0	0	0	0	0	0	0
	359	0	0	0	0	0	0	0	0	0	0	0	0	0	0	0	0	0	0	0	0									359	0	0	0	0	0	0	0	0	0	0	0	0	0	0	0	0	0	0	0
	360	0	0	0	0	0	0	0	0	0	0	0	0	0	0	0	0	0	0	0	0									360	0	0	0	0	0	0	0	0	0	0	0	0	0	0	0	0	0	0	0
	361	0	0	0	0	0	0	0	0	0	0	0	0	0	0	0	0	0	0	0	0									361	0	0	0	0	0	0	0	0	0	0	0	0	0	0	0	0	0	0	0
	362	0	0	0	0	0	0	0	0	0	0	0	0	0	0	0	0	0	0	0	0									362	0	0	0	0	0	0	0	0	0	0	0	0	0	0	0	0	0	0	0
	363	0	0	0	0	0	0	0	0	0	0	0	0	0	0	0	0	0	0	0	0									363	0	0	0	0	0	0	0	0	0	0	0	0	0	0	0	0	0	0	0
	364	0	0	0	0	0	0	0	0	0	0	0	0	0	0	0	0	0	0	0	0									364	0	0	0	0	0	0	0	0	0	0	0	0	0	0	0	0	0	0	0
	365	0	0	0	0	0	0	0	0	0	0	0	0	0	0	0	0	0	0	0	0									365	0	0	0	0	0	0	0	0	0	0	0	0	0	0	0	0	0	0	0
	366	0	0	0	0	0	0	0	0	0	0	0	0	0	0	0	0	0	0	0	0									366	0	0	0	0	0	0	0	0	0	0	0	0	0	0	0	0	0	0	0
	367	0	0	0	0	0	0	0	0	0	0	0	0	0	0	0	0	0	0	0	0									367	0	0	0	0	0	0	0	0	0	0	0	0	0	0	0	0	0	0	0
	368	0	0	0	0	0	0	0	0	0	0	0	0	0	0	0	0	0	0	0	0									368	0	0	0	0	0	0	0	0	0	0	0	0	0	0	0	0	0	0	0
	369	0	0	0	0	0	0	0	0	0	0	0	0	0	0	0	0	0	0	0	0									369	0	0	0	0	0	0	0	0	0	0	0	0	0	0	0	0	0	0	0
	370	0	0	0	0	0	0	0	0	0	0	0	0	0	0	0	0	0	0	0	0									370	0	0	0	0	0	0	0	0	0	0	0	0	0	0	0	0	0	0	0
	371	0	0	0	0	0	0	0	0	0	0	0	0	0	0	0	0	0	0	0	0									371	0	0	0	0	0	0	0	0	0	0	0	0	0	0	0	0	0	0	0
	372	0	0	0	0	0	0	0	0	0	0	0	0	0	0	0	0	0	0	0	0									372	0	0	0	0	0	0	0	0	0	0	0	0	0	0	0	0	0	0	0
	373	0	0	0	0	0	0	0	0	0	0	0	0	0	0	0	0	0	0	0	0									373	0	0	0	0	0	0	0	0	0	0	0	0	0	0	0	0	0	0	0
	374	0	0	0	0	0	0	0	0	0	0	0	0	0	0	0	0	0	0	0	0									374	0	0	0	0	0	0	0	0	0	0	0	0	0	0	0	0	0	0	0
	375	0	0	0	0	0	0	0	0	0	0	0	0	0	0	0	0	0	0	0	0									375	0	0	0	0	0	0	0	0	0	0	0	0	0	0	0	0	0	0	0
	376	0	0	0	0	0	0	0	0	0	0	0	0	0	0	0	0	0	0	0	0									376	0	0	0	0	0	0	0	0	0	0	0	0	0	0	0	0	0	0	0
	377	0	0	0	0	0	0	0	0	0	0	0	0	0	0	0	0	0	0	0	0									377	0	0	0	0	0	0	0	0	0	0	0	0	0	0	0	0	0	0	0
	378	0	0	0	0	0	0	0	0	0	0	0	0	0	0	0	0	0	0	0	0									378	0	0	0	0	0	0	0	0	0	0	0	0	0	0	0	0	0	0	0
	379	0	0	0	0	0	0	0	0	0	0	0	0	0	0	0	0	0	0	0	0									379	0	0	0	0	0	0	0	0	0	0	0	0	0	0	0	0	0	0	0
	380	0	0	0	0	0	0	0	0	0	0	0	0	0	0	0	0	0	0	0	0									380	0	0	0	0	0	0	0	0	0	0	0	0	0	0	0	0	0	0	0
	381	0	0	0	0	0	0	0	0	0	0	0	0	0	0	0	0	0	0	0	0									381	0	0	0	0	0	0	0	0	0	0	0	0	0	0	0	0	0	0	0
	382	0	0	0	0	0	0	0	0	0	0	0	0	0	0	0	0	0	0	0	0									382	0	0	0	0	0	0	0	0	0	0	0	0	0	0	0	0	0	0	0
	383	0	0	0	0	0	0	0	0	0	0	0	0	0	0	0	0	0	0	0	0									383	0	0	0	0	0	0	0	0	0	0	0	0	0	0	0	0	0	0	0
	384	0	0	0	0	0	0	0	0	0	0	0	0	0	0	0	0	0	0	0	0									384	0	0	0	0	0	0	0	0	0	0	0	0	0	0	0	0	0	0	0
	385	0	0	0	0	0	0	0	0	0	0	0	0	0	0	0	0	0	0	0	0									385	0	0	0	0	0	0	0	0	0	0	0	0	0	0	0	0	0	0	0
	386	0	0	0	0	0	0	0	0	0	0	0	0	0	0	0	0	0	0	0	0									386	0	0	0	0	0	0	0	0	0	0	0	0	0	0	0	0	0	0	0
	387	0	0	0	0	0	0	0	0	0	0	0	0	0	0	0	0	0	0	0	0									387	0	0	0	0	0	0	0	0	0	0	0	0	0	0	0	0	0	0	0
	388	0	0	0	0	0	0	0	0	0	0	0	0	0	0	0	0	0	0	0	0									388	0	0	0	0	0	0	0	0	0	0	0	0	0	0	0	0	0	0	0
	389	0	0	0	0	0	0	0	0	0	0	0	0	0	0	0	0	0	0	0	0									389	0	0	0	0	0	0	0	0	0	0	0	0	0	0	0	0	0	0	0
	390	0	0	0	0	0	0	0	0	0	0	0	0	0	0	0	0	0	0	0	0									390	0	0	0	0	0	0	0	0	0	0	0	0	0	0	0	0	0	0	0
	391	0	0	0	0	0	0	0	0	0	0	0	0	0	0	0	0	0	0	0	0									391	0	0	0	0	0	0	0	0	0	0	0	0	0	0	0	0	0	0	0
	392	0	0	0	0	0	0	0	0	0	0	0	0	0	0	0	0	0	0	0	0									392	0	0	0	0	0	0	0	0	0	0	0	0	0	0	0	0	0	0	0
	393	0	0	0	0	0	0	0	0	0	0	0	0	0	0	0	0	0	0	0	0									393	0	0	0	0	0	0	0	0	0	0	0	0	0	0	0	0	0	0	0
	394	0	0	0	0	0	0	0	0	0	0	0	0	0	0	0	0	0	0	0	0									394	0	0	0	0	0	0	0	0	0	0	0	0	0	0	0	0	0	0	0
	395	0	0	0	0	0	0	0	0	0	0	0	0	0	0	0	0	0	0	0	0									395	0	0	0	0	0	0	0	0	0	0	0	0	0	0	0	0	0	0	0
	396	0	0	0	0	0	0	0	0	0	0	0	0	0	0	0	0	0	0	0	0									396	0	0	0	0	0	0	0	0	0	0	0	0	0	0	0	0	0	0	0
	397	0	0	0	0	0	0	0	0	0	0	0	0	0	0	0	0	0	0	0	0									397	0	0	0	0	0	0	0	0	0	0	0	0	0	0	0	0	0	0	0
	398	0	0	0	0	0	0	0	0	0	0	0	0	0	0	0	0	0	0	0	0									398	0	0	0	0	0	0	0	0	0	0	0	0	0	0	0	0	0	0	0
	399	0	0	0	0	0	0	0	0	0	0	0	0	0	0	0	0	0	0	0	0									399	0	0	0	0	0	0	0	0	0	0	0	0	0	0	0	0	0	0	0
	400	0	0	0	0	0	0	0	0	0	0	0	0	0	0	0	0	0	0	0	0									400	0	0	0	0	0	0	0	0	0	0	0	0	0	0	0	0	0	0	0
	401	0	0	0	0	0	0	0	0	0	0	0	0	0	0	0	0	0	0	0	0									401	0	0	0	0	0	0	0	0	0	0	0	0	0	0	0	0	0	0	0
	402	0	0	0	0	0	0	0	0	0	0	0	0	0	0	0	0	0	0	0	0									402	0	0	0	0	0	0	0	0	0	0	0	0	0	0	0	0	0	0	0
	403	0	0	0	0	0	0	0	0	0	0	0	0	0	0	0	0	0	0	0	0									403	0	0	0	0	0	0	0	0	0	0	0	0	0	0	0	0	0	0	0
	404	0	0	0	0	0	0	0	0	0	0	0	0	0	0	0	0	0	0	0	0									404	0	0	0	0	0	0	0	0	0	0	0	0	0	0	0	0	0	0	0
	405	0	0	0	0	0	0	0	0	0	0	0	0	0	0	0	0	0	0	0	0									405	0	0	0	0	0	0	0	0	0	0	0	0	0	0	0	0	0	0	0
	406	0	0	0	0	0	0	0	0	0	0	0	0	0	0	0	0	0	0	0	0									406	0	0	0	0	0	0	0	0	0	0	0	0	0	0	0	0	0	0	0
	407	0	0	0	0	0	0	0	0	0	0	0	0	0	0	0	0	0	0	0	0									407	0	0	0	0	0	0	0	0	0	0	0	0	0	0	0	0	0	0	0
	408	0	0	0	0	0	0	0	0	0	0	0	0	0	0	0	0	0	0	0	0									408	0	0	0	0	0	0	0	0	0	0	0	0	0	0	0	0	0	0	0
	409	0	0	0	0	0	0	0	0	0	0	0	0	0	0	0	0	0	0	0	0									409	0	0	0	0	0	0	0	0	0	0	0	0	0	0	0	0	0	0	0
	410	0	0	0	0	0	0	0	0	0	0	0	0	0	0	0	0	0	0	0	0									410	0	0	0	0	0	0	0	0	0	0	0	0	0	0	0	0	0	0	0
	411	0	0	0	0	0	0	0	0	0	0	0	0	0	0	0	0	0	0	0	0									411	0	0	0	0	0	0	0	0	0	0	0	0	0	0	0	0	0	0	0
	412	0	0	0	0	0	0	0	0	0	0	0	0	0	0	0	0	0	0	0	0									412	0	0	0	0	0	0	0	0	0	0	0	0	0	0	0	0	0	0	0
	413	0	0	0	0	0	0	0	0	0	0	0	0	0	0	0	0	0	0	0	0									413	0	0	0	0	0	0	0	0	0	0	0	0	0	0	0	0	0	0	0
	414	0	0	0	0	0	0	0	0	0	0	0	0	0	0	0	0	0	0	0	0									414	0	0	0	0	0	0	0	0	0	0	0	0	0	0	0	0	0	0	0
	415	0	0	0	0	0	0	0	0	0	0	0	0	0	0	0	0	0	0	0	0									415	0	0	0	0	0	0	0	0	0	0	0	0	0	0	0	0	0	0	0
	416	0	0	0	0	0	0	0	0	0	0	0	0	0	0	0	0	0	0	0	0									416	0	0	0	0	0	0	0	0	0	0	0	0	0	0	0	0	0	0	0
	417	0	0	0	0	0	0	0	0	0	0	0	0	0	0	0	0	0	0	0	0									417	0	0	0	0	0	0	0	0	0	0	0	0	0	0	0	0	0	0	0
	418	0	0	0	0	0	0	0	0	0	0	0	0	0	0	0	0	0	0	0	0									418	0	0	0	0	0	0	0	0	0	0	0	0	0	0	0	0	0	0	0
	419	0	0	0	0	0	0	0	0	0	0	0	0	0	0	0	0	0	0	0	0									419	0	0	0	0	0	0	0	0	0	0	0	0	0	0	0	0	0	0	0
	420	0	0	0	0	0	0	0	0	0	0	0	0	0	0	0	0	0	0	0	0									420	0	0	0	0	0	0	0	0	0	0	0	0	0	0	0	0	0	0	0
	421	0	0	0	0	0	0	0	0	0	0	0	0	0	0	0	0	0	0	0	0									421	0	0	0	0	0	0	0	0	0	0	0	0	0	0	0	0	0	0	0
	422	0	0	0	0	0	0	0	0	0	0	0	0	0	0	0	0	0	0	0	0									422	0	0	0	0	0	0	0	0	0	0	0	0	0	0	0	0	0	0	0
	423	0	0	0	0	0	0	0	0	0	0	0	0	0	0	0	0	0	0	0	0									423	0	0	0	0	0	0	0	0	0	0	0	0	0	0	0	0	0	0	0
	424	0	0	0	0	0	0	0	0	0	0	0	0	0	0	0	0	0	0	0	0									424	0	0	0	0	0	0	0	0	0	0	0	0	0	0	0	0	0	0	0
	425	0	0	0	0	0	0	0	0	0	0	0	0	0	0	0	0	0	0	0	0									425	0	0	0	0	0	0	0	0	0	0	0	0	0	0	0	0	0	0	0
	426	0	0	0	0	0	0	0	0	0	0	0	0	0	0	0	0	0	0	0	0									426	0	0	0	0	0	0	0	0	0	0	0	0	0	0	0	0	0	0	0
	427	0	0	0	0	0	0	0	0	0	0	0	0	0	0	0	0	0	0	0	0									427	0	0	0	0	0	0	0	0	0	0	0	0	0	0	0	0	0	0	0
	428	0	0	0	0	0	0	0	0	0	0	0	0	0	0	0	0	0	0	0	0									428	0	0	0	0	0	0	0	0	0	0	0	0	0	0	0	0	0	0	0
	429	0	0	0	0	0	0	0	0	0	0	0	0	0	0	0	0	0	0	0	0									429	0	0	0	0	0	0	0	0	0	0	0	0	0	0	0	0	0	0	0
	430	0	0	0	0	0	0	0	0	0	0	0	0	0	0	0	0	0	0	0	0									430	0	0	0	0	0	0	0	0	0	0	0	0	0	0	0	0	0	0	0
	431	0	0	0	0	0	0	0	0	0	0	0	0	0	0	0	0	0	0	0	0									431	0	0	0	0	0	0	0	0	0	0	0	0	0	0	0	0	0	0	0
	432	0	0	0	0	0	0	0	0	0	0	0	0	0	0	0	0	0	0	0	0									432	0	0	0	0	0	0	0	0	0	0	0	0	0	0	0	0	0	0	0
	433	0	0	0	0	0	0	0	0	0	0	0	0	0	0	0	0	0	0	0	0									433	0	0	0	0	0	0	0	0	0	0	0	0	0	0	0	0	0	0	0
	434	0	0	0	0	0	0	0	0	0	0	0	0	0	0	0	0	0	0	0	0									434	0	0	0	0	0	0	0	0	0	0	0	0	0	0	0	0	0	0	0
	435	0	0	0	0	0	0	0	0	0	0	0	0	0	0	0	0	0	0	0	0									435	0	0	0	0	0	0	0	0	0	0	0	0	0	0	0	0	0	0	0
	436	0	0	0	0	0	0	0	0	0	0	0	0	0	0	0	0	0	0	0	0									436	0	0	0	0	0	0	0	0	0	0	0	0	0	0	0	0	0	0	0
	437	0	0	0	0	0	0	0	0	0	0	0	0	0	0	0	0	0	0	0	0									437	0	0	0	0	0	0	0	0	0	0	0	0	0	0	0	0	0	0	0
	438	0	0	0	0	0	0	0	0	0	0	0	0	0	0	0	0	0	0	0	0									438	0	0	0	0	0	0	0	0	0	0	0	0	0	0	0	0	0	0	0
	439	0	0	0	0	0	0	0	0	0	0	0	0	0	0	0	0	0	0	0	0									439	0	0	0	0	0	0	0	0	0	0	0	0	0	0	0	0	0	0	0
	440	0	0	0	0	0	0	0	0	0	0	0	0	0	0	0	0	0	0	0	0									440	0	0	0	0	0	0	0	0	0	0	0	0	0	0	0	0	0	0	0
	441	0	0	0	0	0	0	0	0	0	0	0	0	0	0	0	0	0	0	0	0									441	0	0	0	0	0	0	0	0	0	0	0	0	0	0	0	0	0	0	0
	442	0	0	0	0	0	0	0	0	0	0	0	0	0	0	0	0	0	0	0	0									442	0	0	0	0	0	0	0	0	0	0	0	0	0	0	0	0	0	0	0
	443	0	0	0	0	0	0	0	0	0	0	0	0	0	0	0	0	0	0	0	0									443	0	0	0	0	0	0	0	0	0	0	0	0	0	0	0	0	0	0	0
	444	0	0	0	0	0	0	0	0	0	0	0	0	0	0	0	0	0	0	0	0									444	0	0	0	0	0	0	0	0	0	0	0	0	0	0	0	0	0	0	0
	445	0	0	0	0	0	0	0	0	0	0	0	0	0	0	0	0	0	0	0	0									445	0	0	0	0	0	0	0	0	0	0	0	0	0	0	0	0	0	0	0
	446	0	0	0	0	0	0	0	0	0	0	0	0	0	0	0	0	0	0	0	0									446	0	0	0	0	0	0	0	0	0	0	0	0	0	0	0	0	0	0	0
	447	0	0	0	0	0	0	0	0	0	0	0	0	0	0	0	0	0	0	0	0									447	0	0	0	0	0	0	0	0	0	0	0	0	0	0	0	0	0	0	0
	448	0	0	0	0	0	0	0	0	0	0	0	0	0	0	0	0	0	0	0	0									448	0	0	0	0	0	0	0	0	0	0	0	0	0	0	0	0	0	0	0
	449	0	0	0	0	0	0	0	0	0	0	0	0	0	0	0	0	0	0	0	0									449	0	0	0	0	0	0	0	0	0	0	0	0	0	0	0	0	0	0	0
	450	0	0	0	0	0	0	0	0	0	0	0	0	0	0	0	0	0	0	0	0									450	0	0	0	0	0	0	0	0	0	0	0	0	0	0	0	0	0	0	0
	451	0	0	0	0	0	0	0	0	0	0	0	0	0	0	0	0	0	0	0	0									451	0	0	0	0	0	0	0	0	0	0	0	0	0	0	0	0	0	0	0
	452	0	0	0	0	0	0	0	0	0	0	0	0	0	0	0	0	0	0	0	0									452	0	0	0	0	0	0	0	0	0	0	0	0	0	0	0	0	0	0	0
	453	0	0	0	0	0	0	0	0	0	0	0	0	0	0	0	0	0	0	0	0									453	0	0	0	0	0	0	0	0	0	0	0	0	0	0	0	0	0	0	0
	454	0	0	0	0	0	0	0	0	0	0	0	0	0	0	0	0	0	0	0	0									454	0	0	0	0	0	0	0	0	0	0	0	0	0	0	0	0	0	0	0
	455	0	0	0	0	0	0	0	0	0	0	0	0	0	0	0	0	0	0	0	0									455	0	0	0	0	0	0	0	0	0	0	0	0	0	0	0	0	0	0	0
	456	0	0	0	0	0	0	0	0	0	0	0	0	0	0	0	0	0	0	0	0									456	0	0	0	0	0	0	0	0	0	0	0	0	0	0	0	0	0	0	0
	457	0	0	0	0	0	0	0	0	0	0	0	0	0	0	0	0	0	0	0	0									457	0	0	0	0	0	0	0	0	0	0	0	0	0	0	0	0	0	0	0
	458	0	0	0	0	0	0	0	0	0	0	0	0	0	0	0	0	0	0	0	0									458	0	0	0	0	0	0	0	0	0	0	0	0	0	0	0	0	0	0	0
	459	0	0	0	0	0	0	0	0	0	0	0	0	0	0	0	0	0	0	0	0									459	0	0	0	0	0	0	0	0	0	0	0	0	0	0	0	0	0	0	0
	460	0	0	0	0	0	0	0	0	0	0	0	0	0	0	0	0	0	0	0	0									460	0	0	0	0	0	0	0	0	0	0	0	0	0	0	0	0	0	0	0
	461	0	0	0	0	0	0	0	0	0	0	0	0	0	0	0	0	0	0	0	0									461	0	0	0	0	0	0	0	0	0	0	0	0	0	0	0	0	0	0	0
	462	0	0	0	0	0	0	0	0	0	0	0	0	0	0	0	0	0	0	0	0									462	0	0	0	0	0	0	0	0	0	0	0	0	0	0	0	0	0	0	0
	463	0	0	0	0	0	0	0	0	0	0	0	0	0	0	0	0	0	0	0	0									463	0	0	0	0	0	0	0	0	0	0	0	0	0	0	0	0	0	0	0
	464	0	0	0	0	0	0	0	0	0	0	0	0	0	0	0	0	0	0	0	0									464	0	0	0	0	0	0	0	0	0	0	0	0	0	0	0	0	0	0	0
	465	0	0	0	0	0	0	0	0	0	0	0	0	0	0	0	0	0	0	0	0									465	0	0	0	0	0	0	0	0	0	0	0	0	0	0	0	0	0	0	0
	466	0	0	0	0	0	0	0	0	0	0	0	0	0	0	0	0	0	0	0	0									466	0	0	0	0	0	0	0	0	0	0	0	0	0	0	0	0	0	0	0
	467	0	0	0	0	0	0	0	0	0	0	0	0	0	0	0	0	0	0	0	0									467	0	0	0	0	0	0	0	0	0	0	0	0	0	0	0	0	0	0	0
	468	0	0	0	0	0	0	0	0	0	0	0	0	0	0	0	0	0	0	0	0									468	0	0	0	0	0	0	0	0	0	0	0	0	0	0	0	0	0	0	0
	469	0	0	0	0	0	0	0	0	0	0	0	0	0	0	0	0	0	0	0	0									469	0	0	0	0	0	0	0	0	0	0	0	0	0	0	0	0	0	0	0
	470	0	0	0	0	0	0	0	0	0	0	0	0	0	0	0	0	0	0	0	0									470	0	0	0	0	0	0	0	0	0	0	0	0	0	0	0	0	0	0	0
	471	0	0	0	0	0	0	0	0	0	0	0	0	0	0	0	0	0	0	0	0									471	0	0	0	0	0	0	0	0	0	0	0	0	0	0	0	0	0	0	0
	472	0	0	0	0	0	0	0	0	0	0	0	0	0	0	0	0	0	0	0	0									472	0	0	0	0	0	0	0	0	0	0	0	0	0	0	0	0	0	0	0
	473	0	0	0	0	0	0	0	0	0	0	0	0	0	0	0	0	0	0	0	0									473	0	0	0	0	0	0	0	0	0	0	0	0	0	0	0	0	0	0	0
	474	0	0	0	0	0	0	0	0	0	0	0	0	0	0	0	0	0	0	0	0									474	0	0	0	0	0	0	0	0	0	0	0	0	0	0	0	0	0	0	0
	475	0	0	0	0	0	0	0	0	0	0	0	0	0	0	0	0	0	0	0	0									475	0	0	0	0	0	0	0	0	0	0	0	0	0	0	0	0	0	0	0
	476	0	0	0	0	0	0	0	0	0	0	0	0	0	0	0	0	0	0	0	0									476	0	0	0	0	0	0	0	0	0	0	0	0	0	0	0	0	0	0	0
	477	0	0	0	0	0	0	0	0	0	0	0	0	0	0	0	0	0	0	0	0									477	0	0	0	0	0	0	0	0	0	0	0	0	0	0	0	0	0	0	0
	478	0	0	0	0	0	0	0	0	0	0	0	0	0	0	0	0	0	0	0	0									478	0	0	0	0	0	0	0	0	0	0	0	0	0	0	0	0	0	0	0
	479	0	0	0	0	0	0	0	0	0	0	0	0	0	0	0	0	0	0	0	0									479	0	0	0	0	0	0	0	0	0	0	0	0	0	0	0	0	0	0	0
	480	0	0	0	0	0	0	0	0	0	0	0	0	0	0	0	0	0	0	0	0									480	0	0	0	0	0	0	0	0	0	0	0	0	0	0	0	0	0	0	0
	481	0	0	0	0	0	0	0	0	0	0	0	0	0	0	0	0	0	0	0	0									481	0	0	0	0	0	0	0	0	0	0	0	0	0	0	0	0	0	0	0
	482	0	0	0	0	0	0	0	0	0	0	0	0	0	0	0	0	0	0	0	0									482	0	0	0	0	0	0	0	0	0	0	0	0	0	0	0	0	0	0	0
	483	0	0	0	0	0	0	0	0	0	0	0	0	0	0	0	0	0	0	0	0									483	0	0	0	0	0	0	0	0	0	0	0	0	0	0	0	0	0	0	0
	484	0	0	0	0	0	0	0	0	0	0	0	0	0	0	0	0	0	0	0	0									484	0	0	0	0	0	0	0	0	0	0	0	0	0	0	0	0	0	0	0
	485	0	0	0	0	0	0	0	0	0	0	0	0	0	0	0	0	0	0	0	0									485	0	0	0	0	0	0	0	0	0	0	0	0	0	0	0	0	0	0	0
	486	0	0	0	0	0	0	0	0	0	0	0	0	0	0	0	0	0	0	0	0									486	0	0	0	0	0	0	0	0	0	0	0	0	0	0	0	0	0	0	0
	487	0	0	0	0	0	0	0	0	0	0	0	0	0	0	0	0	0	0	0	0									487	0	0	0	0	0	0	0	0	0	0	0	0	0	0	0	0	0	0	0
	488	0	0	0	0	0	0	0	0	0	0	0	0	0	0	0	0	0	0	0	0									488	0	0	0	0	0	0	0	0	0	0	0	0	0	0	0	0	0	0	0
	489	0	0	0	0	0	0	0	0	0	0	0	0	0	0	0	0	0	0	0	0									489	0	0	0	0	0	0	0	0	0	0	0	0	0	0	0	0	0	0	0
	490	0	0	0	0	0	0	0	0	0	0	0	0	0	0	0	0	0	0	0	0									490	0	0	0	0	0	0	0	0	0	0	0	0	0	0	0	0	0	0	0
	491	0	0	0	0	0	0	0	0	0	0	0	0	0	0	0	0	0	0	0	0									491	0	0	0	0	0	0	0	0	0	0	0	0	0	0	0	0	0	0	0
	492	0	0	0	0	0	0	0	0	0	0	0	0	0	0	0	0	0	0	0	0									492	0	0	0	0	0	0	0	0	0	0	0	0	0	0	0	0	0	0	0
	493	0	0	0	0	0	0	0	0	0	0	0	0	0	0	0	0	0	0	0	0									493	0	0	0	0	0	0	0	0	0	0	0	0	0	0	0	0	0	0	0
	494	0	0	0	0	0	0	0	0	0	0	0	0	0	0	0	0	0	0	0	0									494	0	0	0	0	0	0	0	0	0	0	0	0	0	0	0	0	0	0	0
	495	0	0	0	0	0	0	0	0	0	0	0	0	0	0	0	0	0	0	0	0									495	0	0	0	0	0	0	0	0	0	0	0	0	0	0	0	0	0	0	0
	496	0	0	0	0	0	0	0	0	0	0	0	0	0	0	0	0	0	0	0	0									496	0	0	0	0	0	0	0	0	0	0	0	0	0	0	0	0	0	0	0
	497	0	0	0	0	0	0	0	0	0	0	0	0	0	0	0	0	0	0	0	0									497	0	0	0	0	0	0	0	0	0	0	0	0	0	0	0	0	0	0	0
	498	0	0	0	0	0	0	0	0	0	0	0	0	0	0	0	0	0	0	0	0									498	0	0	0	0	0	0	0	0	0	0	0	0	0	0	0	0	0	0	0
	499	0	0	0	0	0	0	0	0	0	0	0	0	0	0	0	0	0	0	0	0									499	0	0	0	0	0	0	0	0	0	0	0	0	0	0	0	0	0	0	0
	500	0	0	0	0	0	0	0	0	0	0	0	0	0	0	0	0	0	0	0	0									500	0	0	0	0	0	0	0	0	0	0	0	0	0	0	0	0	0	0	0
	501	0	0	0	0	0	0	0	0	0	0	0	0	0	0	0	0	0	0	0	0									501	0	0	0	0	0	0	0	0	0	0	0	0	0	0	0	0	0	0	0
	502	0	0	0	0	0	0	0	0	0	0	0	0	0	0	0	0	0	0	0	0									502	0	0	0	0	0	0	0	0	0	0	0	0	0	0	0	0	0	0	0
	503	0	0	0	0	0	0	0	0	0	0	0	0	0	0	0	0	0	0	0	0									503	0	0	0	0	0	0	0	0	0	0	0	0	0	0	0	0	0	0	0
	504	0	0	0	0	0	0	0	0	0	0	0	0	0	0	0	0	0	0	0	0									504	0	0	0	0	0	0	0	0	0	0	0	0	0	0	0	0	0	0	0
	505	0	0	0	0	0	0	0	0	0	0	0	0	0	0	0	0	0	0	0	0									505	0	0	0	0	0	0	0	0	0	0	0	0	0	0	0	0	0	0	0
	506	0	0	0	0	0	0	0	0	0	0	0	0	0	0	0	0	0	0	0	0									506	0	0	0	0	0	0	0	0	0	0	0	0	0	0	0	0	0	0	0
	507	0	0	0	0	0	0	0	0	0	0	0	0	0	0	0	0	0	0	0	0									507	0	0	0	0	0	0	0	0	0	0	0	0	0	0	0	0	0	0	0
	508	0	0	0	0	0	0	0	0	0	0	0	0	0	0	0	0	0	0	0	0									508	0	0	0	0	0	0	0	0	0	0	0	0	0	0	0	0	0	0	0
	509	0	0	0	0	0	0	0	0	0	0	0	0	0	0	0	0	0	0	0	0									509	0	0	0	0	0	0	0	0	0	0	0	0	0	0	0	0	0	0	0
	510	0	0	0	0	0	0	0	0	0	0	0	0	0	0	0	0	0	0	0	0									510	0	0	0	0	0	0	0	0	0	0	0	0	0	0	0	0	0	0	0
	511	0	0	0	0	0	0	0	0	0	0	0	0	0	0	0	0	0	0	0	0									511	0	0	0	0	0	0	0	0	0	0	0	0	0	0	0	0	0	0	0
	512	0	0	0	0	0	0	0	0	0	0	0	0	0	0	0	0	0	0	0	0									512	0	0	0	0	0	0	0	0	0	0	0	0	0	0	0	0	0	0	0
	513	0	0	0	0	0	0	0	0	0	0	0	0	0	0	0	0	0	0	0	0									513	0	0	0	0	0	0	0	0	0	0	0	0	0	0	0	0	0	0	0
	514	0	0	0	0	0	0	0	0	0	0	0	0	0	0	0	0	0	0	0	0									514	0	0	0	0	0	0	0	0	0	0	0	0	0	0	0	0	0	0	0
	515	0	0	0	0	0	0	0	0	0	0	0	0	0	0	0	0	0	0	0	0									515	0	0	0	0	0	0	0	0	0	0	0	0	0	0	0	0	0	0	0
	516	0	0	0	0	0	0	0	0	0	0	0	0	0	0	0	0	0	0	0	0									516	0	0	0	0	0	0	0	0	0	0	0	0	0	0	0	0	0	0	0
	517	0	0	0	0	0	0	0	0	0	0	0	0	0	0	0	0	0	0	0	0									517	0	0	0	0	0	0	0	0	0	0	0	0	0	0	0	0	0	0	0
	518	0	0	0	0	0	0	0	0	0	0	0	0	0	0	0	0	0	0	0	0									518	0	0	0	0	0	0	0	0	0	0	0	0	0	0	0	0	0	0	0
	519	0	0	0	0	0	0	0	0	0	0	0	0	0	0	0	0	0	0	0	0									519	0	0	0	0	0	0	0	0	0	0	0	0	0	0	0	0	0	0	0
	520	0	0	0	0	0	0	0	0	0	0	0	0	0	0	0	0	0	0	0	0									520	0	0	0	0	0	0	0	0	0	0	0	0	0	0	0	0	0	0	0
	521	0	0	0	0	0	0	0	0	0	0	0	0	0	0	0	0	0	0	0	0									521	0	0	0	0	0	0	0	0	0	0	0	0	0	0	0	0	0	0	0
	522	0	0	0	0	0	0	0	0	0	0	0	0	0	0	0	0	0	0	0	0									522	0	0	0	0	0	0	0	0	0	0	0	0	0	0	0	0	0	0	0
	523	0	0	0	0	0	0	0	0	0	0	0	0	0	0	0	0	0	0	0	0									523	0	0	0	0	0	0	0	0	0	0	0	0	0	0	0	0	0	0	0
	524	0	0	0	0	0	0	0	0	0	0	0	0	0	0	0	0	0	0	0	0									524	0	0	0	0	0	0	0	0	0	0	0	0	0	0	0	0	0	0	0
	525	0	0	0	0	0	0	0	0	0	0	0	0	0	0	0	0	0	0	0	0									525	0	0	0	0	0	0	0	0	0	0	0	0	0	0	0	0	0	0	0
	526	0	0	0	0	0	0	0	0	0	0	0	0	0	0	0	0	0	0	0	0									526	0	0	0	0	0	0	0	0	0	0	0	0	0	0	0	0	0	0	0
	527	0	0	0	0	0	0	0	0	0	0	0	0	0	0	0	0	0	0	0	0									527	0	0	0	0	0	0	0	0	0	0	0	0	0	0	0	0	0	0	0
	528	0	0	0	0	0	0	0	0	0	0	0	0	0	0	0	0	0	0	0	0									528	0	0	0	0	0	0	0	0	0	0	0	0	0	0	0	0	0	0	0
	529	0	0	0	0	0	0	0	0	0	0	0	0	0	0	0	0	0	0	0	0									529	0	0	0	0	0	0	0	0	0	0	0	0	0	0	0	0	0	0	0
	530	0	0	0	0	0	0	0	0	0	0	0	0	0	0	0	0	0	0	0	0									530	0	0	0	0	0	0	0	0	0	0	0	0	0	0	0	0	0	0	0
	531	0	0	0	0	0	0	0	0	0	0	0	0	0	0	0	0	0	0	0	0									531	0	0	0	0	0	0	0	0	0	0	0	0	0	0	0	0	0	0	0
	532	0	0	0	0	0	0	0	0	0	0	0	0	0	0	0	0	0	0	0	0									532	0	0	0	0	0	0	0	0	0	0	0	0	0	0	0	0	0	0	0
	533	0	0	0	0	0	0	0	0	0	0	0	0	0	0	0	0	0	0	0	0									533	0	0	0	0	0	0	0	0	0	0	0	0	0	0	0	0	0	0	0
	534	0	0	0	0	0	0	0	0	0	0	0	0	0	0	0	0	0	0	0	0									534	0	0	0	0	0	0	0	0	0	0	0	0	0	0	0	0	0	0	0
	535	0	0	0	0	0	0	0	0	0	0	0	0	0	0	0	0	0	0	0	0									535	0	0	0	0	0	0	0	0	0	0	0	0	0	0	0	0	0	0	0
	536	0	0	0	0	0	0	0	0	0	0	0	0	0	0	0	0	0	0	0	0									536	0	0	0	0	0	0	0	0	0	0	0	0	0	0	0	0	0	0	0
	537	0	0	0	0	0	0	0	0	0	0	0	0	0	0	0	0	0	0	0	0									537	0	0	0	0	0	0	0	0	0	0	0	0	0	0	0	0	0	0	0
	538	0	0	0	0	0	0	0	0	0	0	0	0	0	0	0	0	0	0	0	0									538	0	0	0	0	0	0	0	0	0	0	0	0	0	0	0	0	0	0	0
	539	0	0	0	0	0	0	0	0	0	0	0	0	0	0	0	0	0	0	0	0									539	0	0	0	0	0	0	0	0	0	0	0	0	0	0	0	0	0	0	0
	540	0	0	0	0	0	0	0	0	0	0	0	0	0	0	0	0	0	0	0	0									540	0	0	0	0	0	0	0	0	0	0	0	0	0	0	0	0	0	0	0
	541	0	0	0	0	0	0	0	0	0	0	0	0	0	0	0	0	0	0	0	0									541	0	0	0	0	0	0	0	0	0	0	0	0	0	0	0	0	0	0	0
	542	0	0	0	0	0	0	0	0	0	0	0	0	0	0	0	0	0	0	0	0									542	0	0	0	0	0	0	0	0	0	0	0	0	0	0	0	0	0	0	0
	543	0	0	0	0	0	0	0	0	0	0	0	0	0	0	0	0	0	0	0	0									543	0	0	0	0	0	0	0	0	0	0	0	0	0	0	0	0	0	0	0
	544	0	0	0	0	0	0	0	0	0	0	0	0	0	0	0	0	0	0	0	0									544	0	0	0	0	0	0	0	0	0	0	0	0	0	0	0	0	0	0	0
	545	0	0	0	0	0	0	0	0	0	0	0	0	0	0	0	0	0	0	0	0									545	0	0	0	0	0	0	0	0	0	0	0	0	0	0	0	0	0	0	0
	546	0	0	0	0	0	0	0	0	0	0	0	0	0	0	0	0	0	0	0	0									546	0	0	0	0	0	0	0	0	0	0	0	0	0	0	0	0	0	0	0
	547	0	0	0	0	0	0	0	0	0	0	0	0	0	0	0	0	0	0	0	0									547	0	0	0	0	0	0	0	0	0	0	0	0	0	0	0	0	0	0	0
	548	0	0	0	0	0	0	0	0	0	0	0	0	0	0	0	0	0	0	0	0									548	0	0	0	0	0	0	0	0	0	0	0	0	0	0	0	0	0	0	0
	549	0	0	0	0	0	0	0	0	0	0	0	0	0	0	0	0	0	0	0	0									549	0	0	0	0	0	0	0	0	0	0	0	0	0	0	0	0	0	0	0
	550	0	0	0	0	0	0	0	0	0	0	0	0	0	0	0	0	0	0	0	0									550	0	0	0	0	0	0	0	0	0	0	0	0	0	0	0	0	0	0	0
	551	0	0	0	0	0	0	0	0	0	0	0	0	0	0	0	0	0	0	0	0									551	0	0	0	0	0	0	0	0	0	0	0	0	0	0	0	0	0	0	0
	552	0	0	0	0	0	0	0	0	0	0	0	0	0	0	0	0	0	0	0	0									552	0	0	0	0	0	0	0	0	0	0	0	0	0	0	0	0	0	0	0
	553	0	0	0	0	0	0	0	0	0	0	0	0	0	0	0	0	0	0	0	0									553	0	0	0	0	0	0	0	0	0	0	0	0	0	0	0	0	0	0	0
	554	0	0	0	0	0	0	0	0	0	0	0	0	0	0	0	0	0	0	0	0									554	0	0	0	0	0	0	0	0	0	0	0	0	0	0	0	0	0	0	0
	555	0	0	0	0	0	0	0	0	0	0	0	0	0	0	0	0	0	0	0	0									555	0	0	0	0	0	0	0	0	0	0	0	0	0	0	0	0	0	0	0
	556	0	0	0	0	0	0	0	0	0	0	0	0	0	0	0	0	0	0	0	0									556	0	0	0	0	0	0	0	0	0	0	0	0	0	0	0	0	0	0	0
	557	0	0	0	0	0	0	0	0	0	0	0	0	0	0	0	0	0	0	0	0									557	0	0	0	0	0	0	0	0	0	0	0	0	0	0	0	0	0	0	0
	558	0	0	0	0	0	0	0	0	0	0	0	0	0	0	0	0	0	0	0	0									558	0	0	0	0	0	0	0	0	0	0	0	0	0	0	0	0	0	0	0
	559	0	0	0	0	0	0	0	0	0	0	0	0	0	0	0	0	0	0	0	0									559	0	0	0	0	0	0	0	0	0	0	0	0	0	0	0	0	0	0	0
	560	0	0	0	0	0	0	0	0	0	0	0	0	0	0	0	0	0	0	0	0									560	0	0	0	0	0	0	0	0	0	0	0	0	0	0	0	0	0	0	0
	561	0	0	0	0	0	0	0	0	0	0	0	0	0	0	0	0	0	0	0	0									561	0	0	0	0	0	0	0	0	0	0	0	0	0	0	0	0	0	0	0
	562	0	0	0	0	0	0	0	0	0	0	0	0	0	0	0	0	0	0	0	0									562	0	0	0	0	0	0	0	0	0	0	0	0	0	0	0	0	0	0	0
	563	0	0	0	0	0	0	0	0	0	0	0	0	0	0	0	0	0	0	0	0									563	0	0	0	0	0	0	0	0	0	0	0	0	0	0	0	0	0	0	0
	564	0	0	0	0	0	0	0	0	0	0	0	0	0	0	0	0	0	0	0	0									564	0	0	0	0	0	0	0	0	0	0	0	0	0	0	0	0	0	0	0
	565	0	0	0	0	0	0	0	0	0	0	0	0	0	0	0	0	0	0	0	0									565	0	0	0	0	0	0	0	0	0	0	0	0	0	0	0	0	0	0	0
	566	0	0	0	0	0	0	0	0	0	0	0	0	0	0	0	0	0	0	0	0									566	0	0	0	0	0	0	0	0	0	0	0	0	0	0	0	0	0	0	0
	567	0	0	0	0	0	0	0	0	0	0	0	0	0	0	0	0	0	0	0	0									567	0	0	0	0	0	0	0	0	0	0	0	0	0	0	0	0	0	0	0
	568	0	0	0	0	0	0	0	0	0	0	0	0	0	0	0	0	0	0	0	0									568	0	0	0	0	0	0	0	0	0	0	0	0	0	0	0	0	0	0	0
	569	0	0	0	0	0	0	0	0	0	0	0	0	0	0	0	0	0	0	0	0									569	0	0	0	0	0	0	0	0	0	0	0	0	0	0	0	0	0	0	0
	570	0	0	0	0	0	0	0	0	0	0	0	0	0	0	0	0	0	0	0	0									570	0	0	0	0	0	0	0	0	0	0	0	0	0	0	0	0	0	0	0
	571	0	0	0	0	0	0	0	0	0	0	0	0	0	0	0	0	0	0	0	0									571	0	0	0	0	0	0	0	0	0	0	0	0	0	0	0	0	0	0	0
	572	0	0	0	0	0	0	0	0	0	0	0	0	0	0	0	0	0	0	0	0									572	0	0	0	0	0	0	0	0	0	0	0	0	0	0	0	0	0	0	0
	573	0	0	0	0	0	0	0	0	0	0	0	0	0	0	0	0	0	0	0	0									573	0	0	0	0	0	0	0	0	0	0	0	0	0	0	0	0	0	0	0
	574	0	0	0	0	0	0	0	0	0	0	0	0	0	0	0	0	0	0	0	0									574	0	0	0	0	0	0	0	0	0	0	0	0	0	0	0	0	0	0	0
	575	0	0	0	0	0	0	0	0	0	0	0	0	0	0	0	0	0	0	0	0									575	0	0	0	0	0	0	0	0	0	0	0	0	0	0	0	0	0	0	0
	576	0	0	0	0	0	0	0	0	0	0	0	0	0	0	0	0	0	0	0	0									576	0	0	0	0	0	0	0	0	0	0	0	0	0	0	0	0	0	0	0
	577	0	0	0	0	0	0	0	0	0	0	0	0	0	0	0	0	0	0	0	0									577	0	0	0	0	0	0	0	0	0	0	0	0	0	0	0	0	0	0	0
	578	0	0	0	0	0	0	0	0	0	0	0	0	0	0	0	0	0	0	0	0									578	0	0	0	0	0	0	0	0	0	0	0	0	0	0	0	0	0	0	0
	579	0	0	0	0	0	0	0	0	0	0	0	0	0	0	0	0	0	0	0	0									579	0	0	0	0	0	0	0	0	0	0	0	0	0	0	0	0	0	0	0
	580	0	0	0	0	0	0	0	0	0	0	0	0	0	0	0	0	0	0	0	0									580	0	0	0	0	0	0	0	0	0	0	0	0	0	0	0	0	0	0	0
	581	0	0	0	0	0	0	0	0	0	0	0	0	0	0	0	0	0	0	0	0									581	0	0	0	0	0	0	0	0	0	0	0	0	0	0	0	0	0	0	0
	582	0	0	0	0	0	0	0	0	0	0	0	0	0	0	0	0	0	0	0	0									582	0	0	0	0	0	0	0	0	0	0	0	0	0	0	0	0	0	0	0
	583	0	0	0	0	0	0	0	0	0	0	0	0	0	0	0	0	0	0	0	0									583	0	0	0	0	0	0	0	0	0	0	0	0	0	0	0	0	0	0	0
	584	0	0	0	0	0	0	0	0	0	0	0	0	0	0	0	0	0	0	0	0									584	0	0	0	0	0	0	0	0	0	0	0	0	0	0	0	0	0	0	0
	585	0	0	0	0	0	0	0	0	0	0	0	0	0	0	0	0	0	0	0	0									585	0	0	0	0	0	0	0	0	0	0	0	0	0	0	0	0	0	0	0
	586	0	0	0	0	0	0	0	0	0	0	0	0	0	0	0	0	0	0	0	0									586	0	0	0	0	0	0	0	0	0	0	0	0	0	0	0	0	0	0	0
	587	0	0	0	0	0	0	0	0	0	0	0	0	0	0	0	0	0	0	0	0									587	0	0	0	0	0	0	0	0	0	0	0	0	0	0	0	0	0	0	0
	588	0	0	0	0	0	0	0	0	0	0	0	0	0	0	0	0	0	0	0	0									588	0	0	0	0	0	0	0	0	0	0	0	0	0	0	0	0	0	0	0
	589	0	0	0	0	0	0	0	0	0	0	0	0	0	0	0	0	0	0	0	0									589	0	0	0	0	0	0	0	0	0	0	0	0	0	0	0	0	0	0	0
	590	0	0	0	0	0	0	0	0	0	0	0	0	0	0	0	0	0	0	0	0									590	0	0	0	0	0	0	0	0	0	0	0	0	0	0	0	0	0	0	0
	591	0	0	0	0	0	0	0	0	0	0	0	0	0	0	0	0	0	0	0	0									591	0	0	0	0	0	0	0	0	0	0	0	0	0	0	0	0	0	0	0
	592	0	0	0	0	0	0	0	0	0	0	0	0	0	0	0	0	0	0	0	0									592	0	0	0	0	0	0	0	0	0	0	0	0	0	0	0	0	0	0	0
	593	0	0	0	0	0	0	0	0	0	0	0	0	0	0	0	0	0	0	0	0									593	0	0	0	0	0	0	0	0	0	0	0	0	0	0	0	0	0	0	0
	594	0	0	0	0	0	0	0	0	0	0	0	0	0	0	0	0	0	0	0	0									594	0	0	0	0	0	0	0	0	0	0	0	0	0	0	0	0	0	0	0
	595	0	0	0	0	0	0	0	0	0	0	0	0	0	0	0	0	0	0	0	0									595	0	0	0	0	0	0	0	0	0	0	0	0	0	0	0	0	0	0	0
	596	0	0	0	0	0	0	0	0	0	0	0	0	0	0	0	0	0	0	0	0									596	0	0	0	0	0	0	0	0	0	0	0	0	0	0	0	0	0	0	0
	597	0	0	0	0	0	0	0	0	0	0	0	0	0	0	0	0	0	0	0	0									597	0	0	0	0	0	0	0	0	0	0	0	0	0	0	0	0	0	0	0
	598	0	0	0	0	0	0	0	0	0	0	0	0	0	0	0	0	0	0	0	0									598	0	0	0	0	0	0	0	0	0	0	0	0	0	0	0	0	0	0	0
	599	0	0	0	0	0	0	0	0	0	0	0	0	0	0	0	0	0	0	0	0									599	0	0	0	0	0	0	0	0	0	0	0	0	0	0	0	0	0	0	0
	600	0	0	0	0	0	0	0	0	0	0	0	0	0	0	0	0	0	0	0	0									600	0	0	0	0	0	0	0	0	0	0	0	0	0	0	0	0	0	0	0
	601	0	0	0	0	0	0	0	0	0	0	0	0	0	0	0	0	0	0	0	0									601	0	0	0	0	0	0	0	0	0	0	0	0	0	0	0	0	0	0	0
	602	0	0	0	0	0	0	0	0	0	0	0	0	0	0	0	0	0	0	0	0									602	0	0	0	0	0	0	0	0	0	0	0	0	0	0	0	0	0	0	0
	603	0	0	0	0	0	0	0	0	0	0	0	0	0	0	0	0	0	0	0	0									603	0	0	0	0	0	0	0	0	0	0	0	0	0	0	0	0	0	0	0
	604	0	0	0	0	0	0	0	0	0	0	0	0	0	0	0	0	0	0	0	0									604	0	0	0	0	0	0	0	0	0	0	0	0	0	0	0	0	0	0	0
	605	0	0	0	0	0	0	0	0	0	0	0	0	0	0	0	0	0	0	0	0									605	0	0	0	0	0	0	0	0	0	0	0	0	0	0	0	0	0	0	0
	606	0	0	0	0	0	0	0	0	0	0	0	0	0	0	0	0	0	0	0	0									606	0	0	0	0	0	0	0	0	0	0	0	0	0	0	0	0	0	0	0
	607	0	0	0	0	0	0	0	0	0	0	0	0	0	0	0	0	0	0	0	0									607	0	0	0	0	0	0	0	0	0	0	0	0	0	0	0	0	0	0	0
	608	0	0	0	0	0	0	0	0	0	0	0	0	0	0	0	0	0	0	0	0									608	0	0	0	0	0	0	0	0	0	0	0	0	0	0	0	0	0	0	0
	609	0	0	0	0	0	0	0	0	0	0	0	0	0	0	0	0	0	0	0	0									609	0	0	0	0	0	0	0	0	0	0	0	0	0	0	0	0	0	0	0
	610	0	0	0	0	0	0	0	0	0	0	0	0	0	0	0	0	0	0	0	0									610	0	0	0	0	0	0	0	0	0	0	0	0	0	0	0	0	0	0	0
	611	0	0	0	0	0	0	0	0	0	0	0	0	0	0	0	0	0	0	0	0									611	0	0	0	0	0	0	0	0	0	0	0	0	0	0	0	0	0	0	0
	612	0	0	0	0	0	0	0	0	0	0	0	0	0	0	0	0	0	0	0	0									612	0	0	0	0	0	0	0	0	0	0	0	0	0	0	0	0	0	0	0
	613	0	0	0	0	0	0	0	0	0	0	0	0	0	0	0	0	0	0	0	0									613	0	0	0	0	0	0	0	0	0	0	0	0	0	0	0	0	0	0	0
	614	0	0	0	0	0	0	0	0	0	0	0	0	0	0	0	0	0	0	0	0									614	0	0	0	0	0	0	0	0	0	0	0	0	0	0	0	0	0	0	0
	615	0	0	0	0	0	0	0	0	0	0	0	0	0	0	0	0	0	0	0	0									615	0	0	0	0	0	0	0	0	0	0	0	0	0	0	0	0	0	0	0
	616	0	0	0	0	0	0	0	0	0	0	0	0	0	0	0	0	0	0	0	0									616	0	0	0	0	0	0	0	0	0	0	0	0	0	0	0	0	0	0	0
	617	0	0	0	0	0	0	0	0	0	0	0	0	0	0	0	0	0	0	0	0									617	0	0	0	0	0	0	0	0	0	0	0	0	0	0	0	0	0	0	0
	618	0	0	0	0	0	0	0	0	0	0	0	0	0	0	0	0	0	0	0	0									618	0	0	0	0	0	0	0	0	0	0	0	0	0	0	0	0	0	0	0
	619	0	0	0	0	0	0	0	0	0	0	0	0	0	0	0	0	0	0	0	0									619	0	0	0	0	0	0	0	0	0	0	0	0	0	0	0	0	0	0	0
	620	0	0	0	0	0	0	0	0	0	0	0	0	0	0	0	0	0	0	0	0									620	0	0	0	0	0	0	0	0	0	0	0	0	0	0	0	0	0	0	0
	621	0	0	0	0	0	0	0	0	0	0	0	0	0	0	0	0	0	0	0	0									621	0	0	0	0	0	0	0	0	0	0	0	0	0	0	0	0	0	0	0
	622	0	0	0	0	0	0	0	0	0	0	0	0	0	0	0	0	0	0	0	0									622	0	0	0	0	0	0	0	0	0	0	0	0	0	0	0	0	0	0	0
	623	0	0	0	0	0	0	0	0	0	0	0	0	0	0	0	0	0	0	0	0									623	0	0	0	0	0	0	0	0	0	0	0	0	0	0	0	0	0	0	0
	624	0	0	0	0	0	0	0	0	0	0	0	0	0	0	0	0	0	0	0	0									624	0	0	0	0	0	0	0	0	0	0	0	0	0	0	0	0	0	0	0
	625	0	0	0	0	0	0	0	0	0	0	0	0	0	0	0	0	0	0	0	0									625	0	0	0	0	0	0	0	0	0	0	0	0	0	0	0	0	0	0	0
	626	0	0	0	0	0	0	0	0	0	0	0	0	0	0	0	0	0	0	0	0									626	0	0	0	0	0	0	0	0	0	0	0	0	0	0	0	0	0	0	0
	627	0	0	0	0	0	0	0	0	0	0	0	0	0	0	0	0	0	0	0	0									627	0	0	0	0	0	0	0	0	0	0	0	0	0	0	0	0	0	0	0
	628	0	0	0	0	0	0	0	0	0	0	0	0	0	0	0	0	0	0	0	0									628	0	0	0	0	0	0	0	0	0	0	0	0	0	0	0	0	0	0	0
	629	0	0	0	0	0	0	0	0	0	0	0	0	0	0	0	0	0	0	0	0									629	0	0	0	0	0	0	0	0	0	0	0	0	0	0	0	0	0	0	0
	630	0	0	0	0	0	0	0	0	0	0	0	0	0	0	0	0	0	0	0	0									630	0	0	0	0	0	0	0	0	0	0	0	0	0	0	0	0	0	0	0
	631	0	0	0	0	0	0	0	0	0	0	0	0	0	0	0	0	0	0	0	0									631	0	0	0	0	0	0	0	0	0	0	0	0	0	0	0	0	0	0	0
	632	0	0	0	0	0	0	0	0	0	0	0	0	0	0	0	0	0	0	0	0									632	0	0	0	0	0	0	0	0	0	0	0	0	0	0	0	0	0	0	0
	633	0	0	0	0	0	0	0	0	0	0	0	0	0	0	0	0	0	0	0	0									633	0	0	0	0	0	0	0	0	0	0	0	0	0	0	0	0	0	0	0
	634	0	0	0	0	0	0	0	0	0	0	0	0	0	0	0	0	0	0	0	0									634	0	0	0	0	0	0	0	0	0	0	0	0	0	0	0	0	0	0	0
	635	0	0	0	0	0	0	0	0	0	0	0	0	0	0	0	0	0	0	0	0									635	0	0	0	0	0	0	0	0	0	0	0	0	0	0	0	0	0	0	0
	636	0	0	0	0	0	0	0	0	0	0	0	0	0	0	0	0	0	0	0	0									636	0	0	0	0	0	0	0	0	0	0	0	0	0	0	0	0	0	0	0
	637	0	0	0	0	0	0	0	0	0	0	0	0	0	0	0	0	0	0	0	0									637	0	0	0	0	0	0	0	0	0	0	0	0	0	0	0	0	0	0	0
	638	0	0	0	0	0	0	0	0	0	0	0	0	0	0	0	0	0	0	0	0									638	0	0	0	0	0	0	0	0	0	0	0	0	0	0	0	0	0	0	0
	639	0	0	0	0	0	0	0	0	0	0	0	0	0	0	0	0	0	0	0	0									639	0	0	0	0	0	0	0	0	0	0	0	0	0	0	0	0	0	0	0
	640	0	0	0	0	0	0	0	0	0	0	0	0	0	0	0	0	0	0	0	0									640	0	0	0	0	0	0	0	0	0	0	0	0	0	0	0	0	0	0	0
	641	0	0	0	0	0	0	0	0	0	0	0	0	0	0	0	0	0	0	0	0									641	0	0	0	0	0	0	0	0	0	0	0	0	0	0	0	0	0	0	0
	642	0	0	0	0	0	0	0	0	0	0	0	0	0	0	0	0	0	0	0	0									642	0	0	0	0	0	0	0	0	0	0	0	0	0	0	0	0	0	0	0
	643	0	0	0	0	0	0	0	0	0	0	0	0	0	0	0	0	0	0	0	0									643	0	0	0	0	0	0	0	0	0	0	0	0	0	0	0	0	0	0	0
	644	0	0	0	0	0	0	0	0	0	0	0	0	0	0	0	0	0	0	0	0									644	0	0	0	0	0	0	0	0	0	0	0	0	0	0	0	0	0	0	0
	645	0	0	0	0	0	0	0	0	0	0	0	0	0	0	0	0	0	0	0	0									645	0	0	0	0	0	0	0	0	0	0	0	0	0	0	0	0	0	0	0
	646	0	0	0	0	0	0	0	0	0	0	0	0	0	0	0	0	0	0	0	0									646	0	0	0	0	0	0	0	0	0	0	0	0	0	0	0	0	0	0	0
	647	0	0	0	0	0	0	0	0	0	0	0	0	0	0	0	0	0	0	0	0									647	0	0	0	0	0	0	0	0	0	0	0	0	0	0	0	0	0	0	0
	648	0	0	0	0	0	0	0	0	0	0	0	0	0	0	0	0	0	0	0	0									648	0	0	0	0	0	0	0	0	0	0	0	0	0	0	0	0	0	0	0
	649	0	0	0	0	0	0	0	0	0	0	0	0	0	0	0	0	0	0	0	0									649	0	0	0	0	0	0	0	0	0	0	0	0	0	0	0	0	0	0	0
	650	0	0	0	0	0	0	0	0	0	0	0	0	0	0	0	0	0	0	0	0									650	0	0	0	0	0	0	0	0	0	0	0	0	0	0	0	0	0	0	0
	651	0	0	0	0	0	0	0	0	0	0	0	0	0	0	0	0	0	0	0	0									651	0	0	0	0	0	0	0	0	0	0	0	0	0	0	0	0	0	0	0
	652	0	0	0	0	0	0	0	0	0	0	0	0	0	0	0	0	0	0	0	0									652	0	0	0	0	0	0	0	0	0	0	0	0	0	0	0	0	0	0	0
	653	0	0	0	0	0	0	0	0	0	0	0	0	0	0	0	0	0	0	0	0									653	0	0	0	0	0	0	0	0	0	0	0	0	0	0	0	0	0	0	0
	654	0	0	0	0	0	0	0	0	0	0	0	0	0	0	0	0	0	0	0	0									654	0	0	0	0	0	0	0	0	0	0	0	0	0	0	0	0	0	0	0
	655	0	0	0	0	0	0	0	0	0	0	0	0	0	0	0	0	0	0	0	0									655	0	0	0	0	0	0	0	0	0	0	0	0	0	0	0	0	0	0	0
	656	0	0	0	0	0	0	0	0	0	0	0	0	0	0	0	0	0	0	0	0									656	0	0	0	0	0	0	0	0	0	0	0	0	0	0	0	0	0	0	0
	657	0	0	0	0	0	0	0	0	0	0	0	0	0	0	0	0	0	0	0	0									657	0	0	0	0	0	0	0	0	0	0	0	0	0	0	0	0	0	0	0
	658	0	0	0	0	0	0	0	0	0	0	0	0	0	0	0	0	0	0	0	0									658	0	0	0	0	0	0	0	0	0	0	0	0	0	0	0	0	0	0	0
	659	0	0	0	0	0	0	0	0	0	0	0	0	0	0	0	0	0	0	0	0									659	0	0	0	0	0	0	0	0	0	0	0	0	0	0	0	0	0	0	0
	660	0	0	0	0	0	0	0	0	0	0	0	0	0	0	0	0	0	0	0	0									660	0	0	0	0	0	0	0	0	0	0	0	0	0	0	0	0	0	0	0
	661	0	0	0	0	0	0	0	0	0	0	0	0	0	0	0	0	0	0	0	0									661	0	0	0	0	0	0	0	0	0	0	0	0	0	0	0	0	0	0	0
	662	0	0	0	0	0	0	0	0	0	0	0	0	0	0	0	0	0	0	0	0									662	0	0	0	0	0	0	0	0	0	0	0	0	0	0	0	0	0	0	0
	663	0	0	0	0	0	0	0	0	0	0	0	0	0	0	0	0	0	0	0	0									663	0	0	0	0	0	0	0	0	0	0	0	0	0	0	0	0	0	0	0
	664	0	0	0	0	0	0	0	0	0	0	0	0	0	0	0	0	0	0	0	0									664	0	0	0	0	0	0	0	0	0	0	0	0	0	0	0	0	0	0	0
	665	0	0	0	0	0	0	0	0	0	0	0	0	0	0	0	0	0	0	0	0									665	0	0	0	0	0	0	0	0	0	0	0	0	0	0	0	0	0	0	0
	666	0	0	0	0	0	0	0	0	0	0	0	0	0	0	0	0	0	0	0	0									666	0	0	0	0	0	0	0	0	0	0	0	0	0	0	0	0	0	0	0
	667	0	0	0	0	0	0	0	0	0	0	0	0	0	0	0	0	0	0	0	0									667	0	0	0	0	0	0	0	0	0	0	0	0	0	0	0	0	0	0	0
	668	0	0	0	0	0	0	0	0	0	0	0	0	0	0	0	0	0	0	0	0									668	0	0	0	0	0	0	0	0	0	0	0	0	0	0	0	0	0	0	0
	669	0	0	0	0	0	0	0	0	0	0	0	0	0	0	0	0	0	0	0	0									669	0	0	0	0	0	0	0	0	0	0	0	0	0	0	0	0	0	0	0
	670	0	0	0	0	0	0	0	0	0	0	0	0	0	0	0	0	0	0	0	0									670	0	0	0	0	0	0	0	0	0	0	0	0	0	0	0	0	0	0	0
	671	0	0	0	0	0	0	0	0	0	0	0	0	0	0	0	0	0	0	0	0									671	0	0	0	0	0	0	0	0	0	0	0	0	0	0	0	0	0	0	0
	672	0	0	0	0	0	0	0	0	0	0	0	0	0	0	0	0	0	0	0	0									672	0	0	0	0	0	0	0	0	0	0	0	0	0	0	0	0	0	0	0
	673	0	0	0	0	0	0	0	0	0	0	0	0	0	0	0	0	0	0	0	0									673	0	0	0	0	0	0	0	0	0	0	0	0	0	0	0	0	0	0	0
	674	0	0	0	0	0	0	0	0	0	0	0	0	0	0	0	0	0	0	0	0									674	0	0	0	0	0	0	0	0	0	0	0	0	0	0	0	0	0	0	0
	675	0	0	0	0	0	0	0	0	0	0	0	0	0	0	0	0	0	0	0	0									675	0	0	0	0	0	0	0	0	0	0	0	0	0	0	0	0	0	0	0
	676	0	0	0	0	0	0	0	0	0	0	0	0	0	0	0	0	0	0	0	0									676	0	0	0	0	0	0	0	0	0	0	0	0	0	0	0	0	0	0	0
	677	0	0	0	0	0	0	0	0	0	0	0	0	0	0	0	0	0	0	0	0									677	0	0	0	0	0	0	0	0	0	0	0	0	0	0	0	0	0	0	0
	678	0	0	0	0	0	0	0	0	0	0	0	0	0	0	0	0	0	0	0	0									678	0	0	0	0	0	0	0	0	0	0	0	0	0	0	0	0	0	0	0
	679	0	0	0	0	0	0	0	0	0	0	0	0	0	0	0	0	0	0	0	0									679	0	0	0	0	0	0	0	0	0	0	0	0	0	0	0	0	0	0	0
	680	0	0	0	0	0	0	0	0	0	0	0	0	0	0	0	0	0	0	0	0									680	0	0	0	0	0	0	0	0	0	0	0	0	0	0	0	0	0	0	0
	681	0	0	0	0	0	0	0	0	0	0	0	0	0	0	0	0	0	0	0	0									681	0	0	0	0	0	0	0	0	0	0	0	0	0	0	0	0	0	0	0
	682	0	0	0	0	0	0	0	0	0	0	0	0	0	0	0	0	0	0	0	0									682	0	0	0	0	0	0	0	0	0	0	0	0	0	0	0	0	0	0	0
	683	0	0	0	0	0	0	0	0	0	0	0	0	0	0	0	0	0	0	0	0									683	0	0	0	0	0	0	0	0	0	0	0	0	0	0	0	0	0	0	0
	684	0	0	0	0	0	0	0	0	0	0	0	0	0	0	0	0	0	0	0	0									684	0	0	0	0	0	0	0	0	0	0	0	0	0	0	0	0	0	0	0
	685	0	0	0	0	0	0	0	0	0	0	0	0	0	0	0	0	0	0	0	0									685	0	0	0	0	0	0	0	0	0	0	0	0	0	0	0	0	0	0	0
	686	0	0	0	0	0	0	0	0	0	0	0	0	0	0	0	0	0	0	0	0									686	0	0	0	0	0	0	0	0	0	0	0	0	0	0	0	0	0	0	0
	687	0	0	0	0	0	0	0	0	0	0	0	0	0	0	0	0	0	0	0	0									687	0	0	0	0	0	0	0	0	0	0	0	0	0	0	0	0	0	0	0
	688	0	0	0	0	0	0	0	0	0	0	0	0	0	0	0	0	0	0	0	0									688	0	0	0	0	0	0	0	0	0	0	0	0	0	0	0	0	0	0	0
	689	0	0	0	0	0	0	0	0	0	0	0	0	0	0	0	0	0	0	0	0									689	0	0	0	0	0	0	0	0	0	0	0	0	0	0	0	0	0	0	0
	690	0	0	0	0	0	0	0	0	0	0	0	0	0	0	0	0	0	0	0	0									690	0	0	0	0	0	0	0	0	0	0	0	0	0	0	0	0	0	0	0
	691	0	0	0	0	0	0	0	0	0	0	0	0	0	0	0	0	0	0	0	0									691	0	0	0	0	0	0	0	0	0	0	0	0	0	0	0	0	0	0	0
	692	0	0	0	0	0	0	0	0	0	0	0	0	0	0	0	0	0	0	0	0									692	0	0	0	0	0	0	0	0	0	0	0	0	0	0	0	0	0	0	0
	693	0	0	0	0	0	0	0	0	0	0	0	0	0	0	0	0	0	0	0	0									693	0	0	0	0	0	0	0	0	0	0	0	0	0	0	0	0	0	0	0
	694	0	0	0	0	0	0	0	0	0	0	0	0	0	0	0	0	0	0	0	0									694	0	0	0	0	0	0	0	0	0	0	0	0	0	0	0	0	0	0	0
	695	0	0	0	0	0	0	0	0	0	0	0	0	0	0	0	0	0	0	0	0									695	0	0	0	0	0	0	0	0	0	0	0	0	0	0	0	0	0	0	0
	696	0	0	0	0	0	0	0	0	0	0	0	0	0	0	0	0	0	0	0	0									696	0	0	0	0	0	0	0	0	0	0	0	0	0	0	0	0	0	0	0
	697	0	0	0	0	0	0	0	0	0	0	0	0	0	0	0	0	0	0	0	0									697	0	0	0	0	0	0	0	0	0	0	0	0	0	0	0	0	0	0	0
	698	0	0	0	0	0	0	0	0	0	0	0	0	0	0	0	0	0	0	0	0									698	0	0	0	0	0	0	0	0	0	0	0	0	0	0	0	0	0	0	0
	699	0	0	0	0	0	0	0	0	0	0	0	0	0	0	0	0	0	0	0	0									699	0	0	0	0	0	0	0	0	0	0	0	0	0	0	0	0	0	0	0
	700	0	0	0	0	0	0	0	0	0	0	0	0	0	0	0	0	0	0	0	0									700	0	0	0	0	0	0	0	0	0	0	0	0	0	0	0	0	0	0	0
	701	0	0	0	0	0	0	0	0	0	0	0	0	0	0	0	0	0	0	0	0									701	0	0	0	0	0	0	0	0	0	0	0	0	0	0	0	0	0	0	0
	702	0	0	0	0	0	0	0	0	0	0	0	0	0	0	0	0	0	0	0	0									702	0	0	0	0	0	0	0	0	0	0	0	0	0	0	0	0	0	0	0
	703	0	0	0	0	0	0	0	0	0	0	0	0	0	0	0	0	0	0	0	0									703	0	0	0	0	0	0	0	0	0	0	0	0	0	0	0	0	0	0	0
	704	0	0	0	0	0	0	0	0	0	0	0	0	0	0	0	0	0	0	0	0									704	0	0	0	0	0	0	0	0	0	0	0	0	0	0	0	0	0	0	0
	705	0	0	0	0	0	0	0	0	0	0	0	0	0	0	0	0	0	0	0	0									705	0	0	0	0	0	0	0	0	0	0	0	0	0	0	0	0	0	0	0
	706	0	0	0	0	0	0	0	0	0	0	0	0	0	0	0	0	0	0	0	0									706	0	0	0	0	0	0	0	0	0	0	0	0	0	0	0	0	0	0	0
	707	0	0	0	0	0	0	0	0	0	0	0	0	0	0	0	0	0	0	0	0									707	0	0	0	0	0	0	0	0	0	0	0	0	0	0	0	0	0	0	0
	708	0	0	0	0	0	0	0	0	0	0	0	0	0	0	0	0	0	0	0	0									708	0	0	0	0	0	0	0	0	0	0	0	0	0	0	0	0	0	0	0
	709	0	0	0	0	0	0	0	0	0	0	0	0	0	0	0	0	0	0	0	0									709	0	0	0	0	0	0	0	0	0	0	0	0	0	0	0	0	0	0	0
	710	0	0	0	0	0	0	0	0	0	0	0	0	0	0	0	0	0	0	0	0									710	0	0	0	0	0	0	0	0	0	0	0	0	0	0	0	0	0	0	0
	711	0	0	0	0	0	0	0	0	0	0	0	0	0	0	0	0	0	0	0	0									711	0	0	0	0	0	0	0	0	0	0	0	0	0	0	0	0	0	0	0
	712	0	0	0	0	0	0	0	0	0	0	0	0	0	0	0	0	0	0	0	0									712	0	0	0	0	0	0	0	0	0	0	0	0	0	0	0	0	0	0	0
	713	0	0	0	0	0	0	0	0	0	0	0	0	0	0	0	0	0	0	0	0									713	0	0	0	0	0	0	0	0	0	0	0	0	0	0	0	0	0	0	0
	714	0	0	0	0	0	0	0	0	0	0	0	0	0	0	0	0	0	0	0	0									714	0	0	0	0	0	0	0	0	0	0	0	0	0	0	0	0	0	0	0
	715	0	0	0	0	0	0	0	0	0	0	0	0	0	0	0	0	0	0	0	0									715	0	0	0	0	0	0	0	0	0	0	0	0	0	0	0	0	0	0	0
	716	0	0	0	0	0	0	0	0	0	0	0	0	0	0	0	0	0	0	0	0									716	0	0	0	0	0	0	0	0	0	0	0	0	0	0	0	0	0	0	0
	717	0	0	0	0	0	0	0	0	0	0	0	0	0	0	0	0	0	0	0	0									717	0	0	0	0	0	0	0	0	0	0	0	0	0	0	0	0	0	0	0
	718	0	0	0	0	0	0	0	0	0	0	0	0	0	0	0	0	0	0	0	0									718	0	0	0	0	0	0	0	0	0	0	0	0	0	0	0	0	0	0	0
	719	0	0	0	0	0	0	0	0	0	0	0	0	0	0	0	0	0	0	0	0									719	0	0	0	0	0	0	0	0	0	0	0	0	0	0	0	0	0	0	0
	720	0	0	0	0	0	0	0	0	0	0	0	0	0	0	0	0	0	0	0	0									720	0	0	0	0	0	0	0	0	0	0	0	0	0	0	0	0	0	0	0
	721	0	0	0	0	0	0	0	0	0	0	0	0	0	0	0	0	0	0	0	0									721	0	0	0	0	0	0	0	0	0	0	0	0	0	0	0	0	0	0	0
	722	0	0	0	0	0	0	0	0	0	0	0	0	0	0	0	0	0	0	0	0									722	0	0	0	0	0	0	0	0	0	0	0	0	0	0	0	0	0	0	0
	723	0	0	0	0	0	0	0	0	0	0	0	0	0	0	0	0	0	0	0	0									723	0	0	0	0	0	0	0	0	0	0	0	0	0	0	0	0	0	0	0
	724	0	0	0	0	0	0	0	0	0	0	0	0	0	0	0	0	0	0	0	0									724	0	0	0	0	0	0	0	0	0	0	0	0	0	0	0	0	0	0	0
	725	0	0	0	0	0	0	0	0	0	0	0	0	0	0	0	0	0	0	0	0									725	0	0	0	0	0	0	0	0	0	0	0	0	0	0	0	0	0	0	0
	726	0	0	0	0	0	0	0	0	0	0	0	0	0	0	0	0	0	0	0	0									726	0	0	0	0	0	0	0	0	0	0	0	0	0	0	0	0	0	0	0
	727	0	0	0	0	0	0	0	0	0	0	0	0	0	0	0	0	0	0	0	0									727	0	0	0	0	0	0	0	0	0	0	0	0	0	0	0	0	0	0	0
	728	0	0	0	0	0	0	0	0	0	0	0	0	0	0	0	0	0	0	0	0									728	0	0	0	0	0	0	0	0	0	0	0	0	0	0	0	0	0	0	0
	729	0	0	0	0	0	0	0	0	0	0	0	0	0	0	0	0	0	0	0	0									729	0	0	0	0	0	0	0	0	0	0	0	0	0	0	0	0	0	0	0
	730	0	0	0	0	0	0	0	0	0	0	0	0	0	0	0	0	0	0	0	0									730	0	0	0	0	0	0	0	0	0	0	0	0	0	0	0	0	0	0	0
	731	0	0	0	0	0	0	0	0	0	0	0	0	0	0	0	0	0	0	0	0									731	0	0	0	0	0	0	0	0	0	0	0	0	0	0	0	0	0	0	0
	732	0	0	0	0	0	0	0	0	0	0	0	0	0	0	0	0	0	0	0	0									732	0	0	0	0	0	0	0	0	0	0	0	0	0	0	0	0	0	0	0
	733	0	0	0	0	0	0	0	0	0	0	0	0	0	0	0	0	0	0	0	0									733	0	0	0	0	0	0	0	0	0	0	0	0	0	0	0	0	0	0	0
	734	0	0	0	0	0	0	0	0	0	0	0	0	0	0	0	0	0	0	0	0									734	0	0	0	0	0	0	0	0	0	0	0	0	0	0	0	0	0	0	0
	735	0	0	0	0	0	0	0	0	0	0	0	0	0	0	0	0	0	0	0	0									735	0	0	0	0	0	0	0	0	0	0	0	0	0	0	0	0	0	0	0
	736	0	0	0	0	0	0	0	0	0	0	0	0	0	0	0	0	0	0	0	0									736	0	0	0	0	0	0	0	0	0	0	0	0	0	0	0	0	0	0	0
	737	0	0	0	0	0	0	0	0	0	0	0	0	0	0	0	0	0	0	0	0									737	0	0	0	0	0	0	0	0	0	0	0	0	0	0	0	0	0	0	0
	738	0	0	0	0	0	0	0	0	0	0	0	0	0	0	0	0	0	0	0	0									738	0	0	0	0	0	0	0	0	0	0	0	0	0	0	0	0	0	0	0
	739	0	0	0	0	0	0	0	0	0	0	0	0	0	0	0	0	0	0	0	0									739	0	0	0	0	0	0	0	0	0	0	0	0	0	0	0	0	0	0	0
	740	0	0	0	0	0	0	0	0	0	0	0	0	0	0	0	0	0	0	0	0									740	0	0	0	0	0	0	0	0	0	0	0	0	0	0	0	0	0	0	0
	741	0	0	0	0	0	0	0	0	0	0	0	0	0	0	0	0	0	0	0	0									741	0	0	0	0	0	0	0	0	0	0	0	0	0	0	0	0	0	0	0
	742	0	0	0	0	0	0	0	0	0	0	0	0	0	0	0	0	0	0	0	0									742	0	0	0	0	0	0	0	0	0	0	0	0	0	0	0	0	0	0	0
	743	0	0	0	0	0	0	0	0	0	0	0	0	0	0	0	0	0	0	0	0									743	0	0	0	0	0	0	0	0	0	0	0	0	0	0	0	0	0	0	0
	744	0	0	0	0	0	0	0	0	0	0	0	0	0	0	0	0	0	0	0	0									744	0	0	0	0	0	0	0	0	0	0	0	0	0	0	0	0	0	0	0
	745	0	0	0	0	0	0	0	0	0	0	0	0	0	0	0	0	0	0	0	0									745	0	0	0	0	0	0	0	0	0	0	0	0	0	0	0	0	0	0	0
	746	0	0	0	0	0	0	0	0	0	0	0	0	0	0	0	0	0	0	0	0									746	0	0	0	0	0	0	0	0	0	0	0	0	0	0	0	0	0	0	0
	747	0	0	0	0	0	0	0	0	0	0	0	0	0	0	0	0	0	0	0	0									747	0	0	0	0	0	0	0	0	0	0	0	0	0	0	0	0	0	0	0
	748	0	0	0	0	0	0	0	0	0	0	0	0	0	0	0	0	0	0	0	0									748	0	0	0	0	0	0	0	0	0	0	0	0	0	0	0	0	0	0	0
	749	0	0	0	0	0	0	0	0	0	0	0	0	0	0	0	0	0	0	0	0									749	0	0	0	0	0	0	0	0	0	0	0	0	0	0	0	0	0	0	0
	750	0	0	0	0	0	0	0	0	0	0	0	0	0	0	0	0	0	0	0	0									750	0	0	0	0	0	0	0	0	0	0	0	0	0	0	0	0	0	0	0
	751	0	0	0	0	0	0	0	0	0	0	0	0	0	0	0	0	0	0	0	0									751	0	0	0	0	0	0	0	0	0	0	0	0	0	0	0	0	0	0	0
	752	0	0	0	0	0	0	0	0	0	0	0	0	0	0	0	0	0	0	0	0									752	0	0	0	0	0	0	0	0	0	0	0	0	0	0	0	0	0	0	0
	753	0	0	0	0	0	0	0	0	0	0	0	0	0	0	0	0	0	0	0	0									753	0	0	0	0	0	0	0	0	0	0	0	0	0	0	0	0	0	0	0
	754	0	0	0	0	0	0	0	0	0	0	0	0	0	0	0	0	0	0	0	0									754	0	0	0	0	0	0	0	0	0	0	0	0	0	0	0	0	0	0	0
	755	0	0	0	0	0	0	0	0	0	0	0	0	0	0	0	0	0	0	0	0									755	0	0	0	0	0	0	0	0	0	0	0	0	0	0	0	0	0	0	0
	756	0	0	0	0	0	0	0	0	0	0	0	0	0	0	0	0	0	0	0	0									756	0	0	0	0	0	0	0	0	0	0	0	0	0	0	0	0	0	0	0
	757	0	0	0	0	0	0	0	0	0	0	0	0	0	0	0	0	0	0	0	0									757	0	0	0	0	0	0	0	0	0	0	0	0	0	0	0	0	0	0	0
	758	0	0	0	0	0	0	0	0	0	0	0	0	0	0	0	0	0	0	0	0									758	0	0	0	0	0	0	0	0	0	0	0	0	0	0	0	0	0	0	0
	759	0	0	0	0	0	0	0	0	0	0	0	0	0	0	0	0	0	0	0	0									759	0	0	0	0	0	0	0	0	0	0	0	0	0	0	0	0	0	0	0
	760	0	0	0	0	0	0	0	0	0	0	0	0	0	0	0	0	0	0	0	0									760	0	0	0	0	0	0	0	0	0	0	0	0	0	0	0	0	0	0	0
	761	0	0	0	0	0	0	0	0	0	0	0	0	0	0	0	0	0	0	0	0									761	0	0	0	0	0	0	0	0	0	0	0	0	0	0	0	0	0	0	0
	762	0	0	0	0	0	0	0	0	0	0	0	0	0	0	0	0	0	0	0	0									762	0	0	0	0	0	0	0	0	0	0	0	0	0	0	0	0	0	0	0
	763	0	0	0	0	0	0	0	0	0	0	0	0	0	0	0	0	0	0	0	0									763	0	0	0	0	0	0	0	0	0	0	0	0	0	0	0	0	0	0	0
	764	0	0	0	0	0	0	0	0	0	0	0	0	0	0	0	0	0	0	0	0									764	0	0	0	0	0	0	0	0	0	0	0	0	0	0	0	0	0	0	0
	765	0	0	0	0	0	0	0	0	0	0	0	0	0	0	0	0	0	0	0	0									765	0	0	0	0	0	0	0	0	0	0	0	0	0	0	0	0	0	0	0
	766	0	0	0	0	0	0	0	0	0	0	0	0	0	0	0	0	0	0	0	0									766	0	0	0	0	0	0	0	0	0	0	0	0	0	0	0	0	0	0	0
	767	0	0	0	0	0	0	0	0	0	0	0	0	0	0	0	0	0	0	0	0									767	0	0	0	0	0	0	0	0	0	0	0	0	0	0	0	0	0	0	0
	768	0	0	0	0	0	0	0	0	0	0	0	0	0	0	0	0	0	0	0	0									768	0	0	0	0	0	0	0	0	0	0	0	0	0	0	0	0	0	0	0
	769	0	0	0	0	0	0	0	0	0	0	0	0	0	0	0	0	0	0	0	0									769	0	0	0	0	0	0	0	0	0	0	0	0	0	0	0	0	0	0	0
	770	0	0	0	0	0	0	0	0	0	0	0	0	0	0	0	0	0	0	0	0									770	0	0	0	0	0	0	0	0	0	0	0	0	0	0	0	0	0	0	0
	771	0	0	0	0	0	0	0	0	0	0	0	0	0	0	0	0	0	0	0	0									771	0	0	0	0	0	0	0	0	0	0	0	0	0	0	0	0	0	0	0
	772	0	0	0	0	0	0	0	0	0	0	0	0	0	0	0	0	0	0	0	0									772	0	0	0	0	0	0	0	0	0	0	0	0	0	0	0	0	0	0	0
	773	0	0	0	0	0	0	0	0	0	0	0	0	0	0	0	0	0	0	0	0									773	0	0	0	0	0	0	0	0	0	0	0	0	0	0	0	0	0	0	0
	774	0	0	0	0	0	0	0	0	0	0	0	0	0	0	0	0	0	0	0	0									774	0	0	0	0	0	0	0	0	0	0	0	0	0	0	0	0	0	0	0
	775	0	0	0	0	0	0	0	0	0	0	0	0	0	0	0	0	0	0	0	0									775	0	0	0	0	0	0	0	0	0	0	0	0	0	0	0	0	0	0	0
	776	0	0	0	0	0	0	0	0	0	0	0	0	0	0	0	0	0	0	0	0									776	0	0	0	0	0	0	0	0	0	0	0	0	0	0	0	0	0	0	0
	777	0	0	0	0	0	0	0	0	0	0	0	0	0	0	0	0	0	0	0	0									777	0	0	0	0	0	0	0	0	0	0	0	0	0	0	0	0	0	0	0
	778	0	0	0	0	0	0	0	0	0	0	0	0	0	0	0	0	0	0	0	0									778	0	0	0	0	0	0	0	0	0	0	0	0	0	0	0	0	0	0	0
	779	0	0	0	0	0	0	0	0	0	0	0	0	0	0	0	0	0	0	0	0									779	0	0	0	0	0	0	0	0	0	0	0	0	0	0	0	0	0	0	0
	780	0	0	0	0	0	0	0	0	0	0	0	0	0	0	0	0	0	0	0	0									780	0	0	0	0	0	0	0	0	0	0	0	0	0	0	0	0	0	0	0
	781	0	0	0	0	0	0	0	0	0	0	0	0	0	0	0	0	0	0	0	0									781	0	0	0	0	0	0	0	0	0	0	0	0	0	0	0	0	0	0	0
	782	0	0	0	0	0	0	0	0	0	0	0	0	0	0	0	0	0	0	0	0									782	0	0	0	0	0	0	0	0	0	0	0	0	0	0	0	0	0	0	0
	783	0	0	0	0	0	0	0	0	0	0	0	0	0	0	0	0	0	0	0	0									783	0	0	0	0	0	0	0	0	0	0	0	0	0	0	0	0	0	0	0
	784	0	0	0	0	0	0	0	0	0	0	0	0	0	0	0	0	0	0	0	0									784	0	0	0	0	0	0	0	0	0	0	0	0	0	0	0	0	0	0	0
	785	0	0	0	0	0	0	0	0	0	0	0	0	0	0	0	0	0	0	0	0									785	0	0	0	0	0	0	0	0	0	0	0	0	0	0	0	0	0	0	0
	786	0	0	0	0	0	0	0	0	0	0	0	0	0	0	0	0	0	0	0	0									786	0	0	0	0	0	0	0	0	0	0	0	0	0	0	0	0	0	0	0
	787	0	0	0	0	0	0	0	0	0	0	0	0	0	0	0	0	0	0	0	0									787	0	0	0	0	0	0	0	0	0	0	0	0	0	0	0	0	0	0	0
	788	0	0	0	0	0	0	0	0	0	0	0	0	0	0	0	0	0	0	0	0									788	0	0	0	0	0	0	0	0	0	0	0	0	0	0	0	0	0	0	0
	789	0	0	0	0	0	0	0	0	0	0	0	0	0	0	0	0	0	0	0	0									789	0	0	0	0	0	0	0	0	0	0	0	0	0	0	0	0	0	0	0
	790	0	0	0	0	0	0	0	0	0	0	0	0	0	0	0	0	0	0	0	0									790	0	0	0	0	0	0	0	0	0	0	0	0	0	0	0	0	0	0	0
	791	0	0	0	0	0	0	0	0	0	0	0	0	0	0	0	0	0	0	0	0									791	0	0	0	0	0	0	0	0	0	0	0	0	0	0	0	0	0	0	0
	792	0	0	0	0	0	0	0	0	0	0	0	0	0	0	0	0	0	0	0	0									792	0	0	0	0	0	0	0	0	0	0	0	0	0	0	0	0	0	0	0
	793	0	0	0	0	0	0	0	0	0	0	0	0	0	0	0	0	0	0	0	0									793	0	0	0	0	0	0	0	0	0	0	0	0	0	0	0	0	0	0	0
	794	0	0	0	0	0	0	0	0	0	0	0	0	0	0	0	0	0	0	0	0									794	0	0	0	0	0	0	0	0	0	0	0	0	0	0	0	0	0	0	0
	795	0	0	0	0	0	0	0	0	0	0	0	0	0	0	0	0	0	0	0	0									795	0	0	0	0	0	0	0	0	0	0	0	0	0	0	0	0	0	0	0
	796	0	0	0	0	0	0	0	0	0	0	0	0	0	0	0	0	0	0	0	0									796	0	0	0	0	0	0	0	0	0	0	0	0	0	0	0	0	0	0	0
	797	0	0	0	0	0	0	0	0	0	0	0	0	0	0	0	0	0	0	0	0									797	0	0	0	0	0	0	0	0	0	0	0	0	0	0	0	0	0	0	0
	798	0	0	0	0	0	0	0	0	0	0	0	0	0	0	0	0	0	0	0	0									798	0	0	0	0	0	0	0	0	0	0	0	0	0	0	0	0	0	0	0
	799	0	0	0	0	0	0	0	0	0	0	0	0	0	0	0	0	0	0	0	0									799	0	0	0	0	0	0	0	0	0	0	0	0	0	0	0	0	0	0	0
	800	0	0	0	0	0	0	0	0	0	0	0	0	0	0	0	0	0	0	0	0									800	0	0	0	0	0	0	0	0	0	0	0	0	0	0	0	0	0	0	0
	801	0	0	0	0	0	0	0	0	0	0	0	0	0	0	0	0	0	0	0	0									801	0	0	0	0	0	0	0	0	0	0	0	0	0	0	0	0	0	0	0
	802	0	0	0	0	0	0	0	0	0	0	0	0	0	0	0	0	0	0	0	0									802	0	0	0	0	0	0	0	0	0	0	0	0	0	0	0	0	0	0	0
	803	0	0	0	0	0	0	0	0	0	0	0	0	0	0	0	0	0	0	0	0									803	0	0	0	0	0	0	0	0	0	0	0	0	0	0	0	0	0	0	0
	804	0	0	0	0	0	0	0	0	0	0	0	0	0	0	0	0	0	0	0	0									804	0	0	0	0	0	0	0	0	0	0	0	0	0	0	0	0	0	0	0
	805	0	0	0	0	0	0	0	0	0	0	0	0	0	0	0	0	0	0	0	0									805	0	0	0	0	0	0	0	0	0	0	0	0	0	0	0	0	0	0	0
	806	0	0	0	0	0	0	0	0	0	0	0	0	0	0	0	0	0	0	0	0									806	0	0	0	0	0	0	0	0	0	0	0	0	0	0	0	0	0	0	0
	807	0	0	0	0	0	0	0	0	0	0	0	0	0	0	0	0	0	0	0	0									807	0	0	0	0	0	0	0	0	0	0	0	0	0	0	0	0	0	0	0
	808	0	0	0	0	0	0	0	0	0	0	0	0	0	0	0	0	0	0	0	0									808	0	0	0	0	0	0	0	0	0	0	0	0	0	0	0	0	0	0	0
	809	0	0	0	0	0	0	0	0	0	0	0	0	0	0	0	0	0	0	0	0									809	0	0	0	0	0	0	0	0	0	0	0	0	0	0	0	0	0	0	0
	810	0	0	0	0	0	0	0	0	0	0	0	0	0	0	0	0	0	0	0	0									810	0	0	0	0	0	0	0	0	0	0	0	0	0	0	0	0	0	0	0
	811	0	0	0	0	0	0	0	0	0	0	0	0	0	0	0	0	0	0	0	0									811	0	0	0	0	0	0	0	0	0	0	0	0	0	0	0	0	0	0	0
	812	0	0	0	0	0	0	0	0	0	0	0	0	0	0	0	0	0	0	0	0									812	0	0	0	0	0	0	0	0	0	0	0	0	0	0	0	0	0	0	0
	813	0	0	0	0	0	0	0	0	0	0	0	0	0	0	0	0	0	0	0	0									813	0	0	0	0	0	0	0	0	0	0	0	0	0	0	0	0	0	0	0
	814	0	0	0	0	0	0	0	0	0	0	0	0	0	0	0	0	0	0	0	0									814	0	0	0	0	0	0	0	0	0	0	0	0	0	0	0	0	0	0	0
	815	0	0	0	0	0	0	0	0	0	0	0	0	0	0	0	0	0	0	0	0									815	0	0	0	0	0	0	0	0	0	0	0	0	0	0	0	0	0	0	0
	816	0	0	0	0	0	0	0	0	0	0	0	0	0	0	0	0	0	0	0	0									816	0	0	0	0	0	0	0	0	0	0	0	0	0	0	0	0	0	0	0
	817	0	0	0	0	0	0	0	0	0	0	0	0	0	0	0	0	0	0	0	0									817	0	0	0	0	0	0	0	0	0	0	0	0	0	0	0	0	0	0	0
	818	0	0	0	0	0	0	0	0	0	0	0	0	0	0	0	0	0	0	0	0									818	0	0	0	0	0	0	0	0	0	0	0	0	0	0	0	0	0	0	0
	819	0	0	0	0	0	0	0	0	0	0	0	0	0	0	0	0	0	0	0	0									819	0	0	0	0	0	0	0	0	0	0	0	0	0	0	0	0	0	0	0
	820	0	0	0	0	0	0	0	0	0	0	0	0	0	0	0	0	0	0	0	0									820	0	0	0	0	0	0	0	0	0	0	0	0	0	0	0	0	0	0	0
	821	0	0	0	0	0	0	0	0	0	0	0	0	0	0	0	0	0	0	0	0									821	0	0	0	0	0	0	0	0	0	0	0	0	0	0	0	0	0	0	0
	822	0	0	0	0	0	0	0	0	0	0	0	0	0	0	0	0	0	0	0	0									822	0	0	0	0	0	0	0	0	0	0	0	0	0	0	0	0	0	0	0
	823	0	0	0	0	0	0	0	0	0	0	0	0	0	0	0	0	0	0	0	0									823	0	0	0	0	0	0	0	0	0	0	0	0	0	0	0	0	0	0	0
	824	0	0	0	0	0	0	0	0	0	0	0	0	0	0	0	0	0	0	0	0									824	0	0	0	0	0	0	0	0	0	0	0	0	0	0	0	0	0	0	0
	825	0	0	0	0	0	0	0	0	0	0	0	0	0	0	0	0	0	0	0	0									825	0	0	0	0	0	0	0	0	0	0	0	0	0	0	0	0	0	0	0
	826	0	0	0	0	0	0	0	0	0	0	0	0	0	0	0	0	0	0	0	0									826	0	0	0	0	0	0	0	0	0	0	0	0	0	0	0	0	0	0	0
	827	0	0	0	0	0	0	0	0	0	0	0	0	0	0	0	0	0	0	0	0									827	0	0	0	0	0	0	0	0	0	0	0	0	0	0	0	0	0	0	0
	828	0	0	0	0	0	0	0	0	0	0	0	0	0	0	0	0	0	0	0	0									828	0	0	0	0	0	0	0	0	0	0	0	0	0	0	0	0	0	0	0
	829	0	0	0	0	0	0	0	0	0	0	0	0	0	0	0	0	0	0	0	0									829	0	0	0	0	0	0	0	0	0	0	0	0	0	0	0	0	0	0	0
	830	0	0	0	0	0	0	0	0	0	0	0	0	0	0	0	0	0	0	0	0									830	0	0	0	0	0	0	0	0	0	0	0	0	0	0	0	0	0	0	0
	831	0	0	0	0	0	0	0	0	0	0	0	0	0	0	0	0	0	0	0	0									831	0	0	0	0	0	0	0	0	0	0	0	0	0	0	0	0	0	0	0
	832	0	0	0	0	0	0	0	0	0	0	0	0	0	0	0	0	0	0	0	0									832	0	0	0	0	0	0	0	0	0	0	0	0	0	0	0	0	0	0	0
	833	0	0	0	0	0	0	0	0	0	0	0	0	0	0	0	0	0	0	0	0									833	0	0	0	0	0	0	0	0	0	0	0	0	0	0	0	0	0	0	0
	834	0	0	0	0	0	0	0	0	0	0	0	0	0	0	0	0	0	0	0	0									834	0	0	0	0	0	0	0	0	0	0	0	0	0	0	0	0	0	0	0
	835	0	0	0	0	0	0	0	0	0	0	0	0	0	0	0	0	0	0	0	0									835	0	0	0	0	0	0	0	0	0	0	0	0	0	0	0	0	0	0	0
	836	0	0	0	0	0	0	0	0	0	0	0	0	0	0	0	0	0	0	0	0									836	0	0	0	0	0	0	0	0	0	0	0	0	0	0	0	0	0	0	0
	837	0	0	0	0	0	0	0	0	0	0	0	0	0	0	0	0	0	0	0	0									837	0	0	0	0	0	0	0	0	0	0	0	0	0	0	0	0	0	0	0
	838	0	0	0	0	0	0	0	0	0	0	0	0	0	0	0	0	0	0	0	0									838	0	0	0	0	0	0	0	0	0	0	0	0	0	0	0	0	0	0	0
	839	0	0	0	0	0	0	0	0	0	0	0	0	0	0	0	0	0	0	0	0									839	0	0	0	0	0	0	0	0	0	0	0	0	0	0	0	0	0	0	0
	840	0	0	0	0	0	0	0	0	0	0	0	0	0	0	0	0	0	0	0	0									840	0	0	0	0	0	0	0	0	0	0	0	0	0	0	0	0	0	0	0
	841	0	0	0	0	0	0	0	0	0	0	0	0	0	0	0	0	0	0	0	0									841	0	0	0	0	0	0	0	0	0	0	0	0	0	0	0	0	0	0	0
	842	0	0	0	0	0	0	0	0	0	0	0	0	0	0	0	0	0	0	0	0									842	0	0	0	0	0	0	0	0	0	0	0	0	0	0	0	0	0	0	0
	843	0	0	0	0	0	0	0	0	0	0	0	0	0	0	0	0	0	0	0	0									843	0	0	0	0	0	0	0	0	0	0	0	0	0	0	0	0	0	0	0
	844	0	0	0	0	0	0	0	0	0	0	0	0	0	0	0	0	0	0	0	0									844	0	0	0	0	0	0	0	0	0	0	0	0	0	0	0	0	0	0	0
	845	0	0	0	0	0	0	0	0	0	0	0	0	0	0	0	0	0	0	0	0									845	0	0	0	0	0	0	0	0	0	0	0	0	0	0	0	0	0	0	0
	846	0	0	0	0	0	0	0	0	0	0	0	0	0	0	0	0	0	0	0	0									846	0	0	0	0	0	0	0	0	0	0	0	0	0	0	0	0	0	0	0
	847	0	0	0	0	0	0	0	0	0	0	0	0	0	0	0	0	0	0	0	0									847	0	0	0	0	0	0	0	0	0	0	0	0	0	0	0	0	0	0	0
	848	0	0	0	0	0	0	0	0	0	0	0	0	0	0	0	0	0	0	0	0									848	0	0	0	0	0	0	0	0	0	0	0	0	0	0	0	0	0	0	0
	849	0	0	0	0	0	0	0	0	0	0	0	0	0	0	0	0	0	0	0	0									849	0	0	0	0	0	0	0	0	0	0	0	0	0	0	0	0	0	0	0
	850	0	0	0	0	0	0	0	0	0	0	0	0	0	0	0	0	0	0	0	0									850	0	0	0	0	0	0	0	0	0	0	0	0	0	0	0	0	0	0	0
	851	0	0	0	0	0	0	0	0	0	0	0	0	0	0	0	0	0	0	0	0									851	0	0	0	0	0	0	0	0	0	0	0	0	0	0	0	0	0	0	0
	852	0	0	0	0	0	0	0	0	0	0	0	0	0	0	0	0	0	0	0	0									852	0	0	0	0	0	0	0	0	0	0	0	0	0	0	0	0	0	0	0
	853	0	0	0	0	0	0	0	0	0	0	0	0	0	0	0	0	0	0	0	0									853	0	0	0	0	0	0	0	0	0	0	0	0	0	0	0	0	0	0	0
	854	0	0	0	0	0	0	0	0	0	0	0	0	0	0	0	0	0	0	0	0									854	0	0	0	0	0	0	0	0	0	0	0	0	0	0	0	0	0	0	0
	855	0	0	0	0	0	0	0	0	0	0	0	0	0	0	0	0	0	0	0	0									855	0	0	0	0	0	0	0	0	0	0	0	0	0	0	0	0	0	0	0
	856	0	0	0	0	0	0	0	0	0	0	0	0	0	0	0	0	0	0	0	0									856	0	0	0	0	0	0	0	0	0	0	0	0	0	0	0	0	0	0	0
	857	0	0	0	0	0	0	0	0	0	0	0	0	0	0	0	0	0	0	0	0									857	0	0	0	0	0	0	0	0	0	0	0	0	0	0	0	0	0	0	0
	858	0	0	0	0	0	0	0	0	0	0	0	0	0	0	0	0	0	0	0	0									858	0	0	0	0	0	0	0	0	0	0	0	0	0	0	0	0	0	0	0
	859	0	0	0	0	0	0	0	0	0	0	0	0	0	0	0	0	0	0	0	0									859	0	0	0	0	0	0	0	0	0	0	0	0	0	0	0	0	0	0	0
	860	0	0	0	0	0	0	0	0	0	0	0	0	0	0	0	0	0	0	0	0									860	0	0	0	0	0	0	0	0	0	0	0	0	0	0	0	0	0	0	0
	861	0	0	0	0	0	0	0	0	0	0	0	0	0	0	0	0	0	0	0	0									861	0	0	0	0	0	0	0	0	0	0	0	0	0	0	0	0	0	0	0
	862	0	0	0	0	0	0	0	0	0	0	0	0	0	0	0	0	0	0	0	0									862	0	0	0	0	0	0	0	0	0	0	0	0	0	0	0	0	0	0	0
	863	0	0	0	0	0	0	0	0	0	0	0	0	0	0	0	0	0	0	0	0									863	0	0	0	0	0	0	0	0	0	0	0	0	0	0	0	0	0	0	0
	864	0	0	0	0	0	0	0	0	0	0	0	0	0	0	0	0	0	0	0	0									864	0	0	0	0	0	0	0	0	0	0	0	0	0	0	0	0	0	0	0
	865	0	0	0	0	0	0	0	0	0	0	0	0	0	0	0	0	0	0	0	0									865	0	0	0	0	0	0	0	0	0	0	0	0	0	0	0	0	0	0	0
	866	0	0	0	0	0	0	0	0	0	0	0	0	0	0	0	0	0	0	0	0									866	0	0	0	0	0	0	0	0	0	0	0	0	0	0	0	0	0	0	0
	867	0	0	0	0	0	0	0	0	0	0	0	0	0	0	0	0	0	0	0	0									867	0	0	0	0	0	0	0	0	0	0	0	0	0	0	0	0	0	0	0
	868	0	0	0	0	0	0	0	0	0	0	0	0	0	0	0	0	0	0	0	0									868	0	0	0	0	0	0	0	0	0	0	0	0	0	0	0	0	0	0	0
	869	0	0	0	0	0	0	0	0	0	0	0	0	0	0	0	0	0	0	0	0									869	0	0	0	0	0	0	0	0	0	0	0	0	0	0	0	0	0	0	0
	870	0	0	0	0	0	0	0	0	0	0	0	0	0	0	0	0	0	0	0	0									870	0	0	0	0	0	0	0	0	0	0	0	0	0	0	0	0	0	0	0
	871	0	0	0	0	0	0	0	0	0	0	0	0	0	0	0	0	0	0	0	0									871	0	0	0	0	0	0	0	0	0	0	0	0	0	0	0	0	0	0	0
	872	0	0	0	0	0	0	0	0	0	0	0	0	0	0	0	0	0	0	0	0									872	0	0	0	0	0	0	0	0	0	0	0	0	0	0	0	0	0	0	0
	873	0	0	0	0	0	0	0	0	0	0	0	0	0	0	0	0	0	0	0	0									873	0	0	0	0	0	0	0	0	0	0	0	0	0	0	0	0	0	0	0
	874	0	0	0	0	0	0	0	0	0	0	0	0	0	0	0	0	0	0	0	0									874	0	0	0	0	0	0	0	0	0	0	0	0	0	0	0	0	0	0	0
	875	0	0	0	0	0	0	0	0	0	0	0	0	0	0	0	0	0	0	0	0									875	0	0	0	0	0	0	0	0	0	0	0	0	0	0	0	0	0	0	0
	876	0	0	0	0	0	0	0	0	0	0	0	0	0	0	0	0	0	0	0	0									876	0	0	0	0	0	0	0	0	0	0	0	0	0	0	0	0	0	0	0
	877	0	0	0	0	0	0	0	0	0	0	0	0	0	0	0	0	0	0	0	0									877	0	0	0	0	0	0	0	0	0	0	0	0	0	0	0	0	0	0	0
	878	0	0	0	0	0	0	0	0	0	0	0	0	0	0	0	0	0	0	0	0									878	0	0	0	0	0	0	0	0	0	0	0	0	0	0	0	0	0	0	0
	879	0	0	0	0	0	0	0	0	0	0	0	0	0	0	0	0	0	0	0	0									879	0	0	0	0	0	0	0	0	0	0	0	0	0	0	0	0	0	0	0
	880	0	0	0	0	0	0	0	0	0	0	0	0	0	0	0	0	0	0	0	0									880	0	0	0	0	0	0	0	0	0	0	0	0	0	0	0	0	0	0	0
	881	0	0	0	0	0	0	0	0	0	0	0	0	0	0	0	0	0	0	0	0									881	0	0	0	0	0	0	0	0	0	0	0	0	0	0	0	0	0	0	0
	882	0	0	0	0	0	0	0	0	0	0	0	0	0	0	0	0	0	0	0	0									882	0	0	0	0	0	0	0	0	0	0	0	0	0	0	0	0	0	0	0
	883	0	0	0	0	0	0	0	0	0	0	0	0	0	0	0	0	0	0	0	0									883	0	0	0	0	0	0	0	0	0	0	0	0	0	0	0	0	0	0	0
	884	0	0	0	0	0	0	0	0	0	0	0	0	0	0	0	0	0	0	0	0									884	0	0	0	0	0	0	0	0	0	0	0	0	0	0	0	0	0	0	0
	885	0	0	0	0	0	0	0	0	0	0	0	0	0	0	0	0	0	0	0	0									885	0	0	0	0	0	0	0	0	0	0	0	0	0	0	0	0	0	0	0
	886	0	0	0	0	0	0	0	0	0	0	0	0	0	0	0	0	0	0	0	0									886	0	0	0	0	0	0	0	0	0	0	0	0	0	0	0	0	0	0	0
	887	0	0	0	0	0	0	0	0	0	0	0	0	0	0	0	0	0	0	0	0									887	0	0	0	0	0	0	0	0	0	0	0	0	0	0	0	0	0	0	0
	888	0	0	0	0	0	0	0	0	0	0	0	0	0	0	0	0	0	0	0	0									888	0	0	0	0	0	0	0	0	0	0	0	0	0	0	0	0	0	0	0
	889	0	0	0	0	0	0	0	0	0	0	0	0	0	0	0	0	0	0	0	0									889	0	0	0	0	0	0	0	0	0	0	0	0	0	0	0	0	0	0	0
	890	0	0	0	0	0	0	0	0	0	0	0	0	0	0	0	0	0	0	0	0									890	0	0	0	0	0	0	0	0	0	0	0	0	0	0	0	0	0	0	0
	891	0	0	0	0	0	0	0	0	0	0	0	0	0	0	0	0	0	0	0	0									891	0	0	0	0	0	0	0	0	0	0	0	0	0	0	0	0	0	0	0
	892	0	0	0	0	0	0	0	0	0	0	0	0	0	0	0	0	0	0	0	0									892	0	0	0	0	0	0	0	0	0	0	0	0	0	0	0	0	0	0	0
	893	0	0	0	0	0	0	0	0	0	0	0	0	0	0	0	0	0	0	0	0									893	0	0	0	0	0	0	0	0	0	0	0	0	0	0	0	0	0	0	0
	894	0	0	0	0	0	0	0	0	0	0	0	0	0	0	0	0	0	0	0	0									894	0	0	0	0	0	0	0	0	0	0	0	0	0	0	0	0	0	0	0
	895	0	0	0	0	0	0	0	0	0	0	0	0	0	0	0	0	0	0	0	0									895	0	0	0	0	0	0	0	0	0	0	0	0	0	0	0	0	0	0	0
	896	0	0	0	0	0	0	0	0	0	0	0	0	0	0	0	0	0	0	0	0									896	0	0	0	0	0	0	0	0	0	0	0	0	0	0	0	0	0	0	0
	897	0	0	0	0	0	0	0	0	0	0	0	0	0	0	0	0	0	0	0	0									897	0	0	0	0	0	0	0	0	0	0	0	0	0	0	0	0	0	0	0
	898	0	0	0	0	0	0	0	0	0	0	0	0	0	0	0	0	0	0	0	0									898	0	0	0	0	0	0	0	0	0	0	0	0	0	0	0	0	0	0	0
	899	0	0	0	0	0	0	0	0	0	0	0	0	0	0	0	0	0	0	0	0									899	0	0	0	0	0	0	0	0	0	0	0	0	0	0	0	0	0	0	0
	900	0	0	0	0	0	0	0	0	0	0	0	0	0	0	0	0	0	0	0	0									900	0	0	0	0	0	0	0	0	0	0	0	0	0	0	0	0	0	0	0
	901	0	0	0	0	0	0	0	0	0	0	0	0	0	0	0	0	0	0	0	0									901	0	0	0	0	0	0	0	0	0	0	0	0	0	0	0	0	0	0	0
	902	0	0	0	0	0	0	0	0	0	0	0	0	0	0	0	0	0	0	0	0									902	0	0	0	0	0	0	0	0	0	0	0	0	0	0	0	0	0	0	0
	903	0	0	0	0	0	0	0	0	0	0	0	0	0	0	0	0	0	0	0	0									903	0	0	0	0	0	0	0	0	0	0	0	0	0	0	0	0	0	0	0
	904	0	0	0	0	0	0	0	0	0	0	0	0	0	0	0	0	0	0	0	0									904	0	0	0	0	0	0	0	0	0	0	0	0	0	0	0	0	0	0	0
	905	0	0	0	0	0	0	0	0	0	0	0	0	0	0	0	0	0	0	0	0									905	0	0	0	0	0	0	0	0	0	0	0	0	0	0	0	0	0	0	0
	906	0	0	0	0	0	0	0	0	0	0	0	0	0	0	0	0	0	0	0	0									906	0	0	0	0	0	0	0	0	0	0	0	0	0	0	0	0	0	0	0
	907	0	0	0	0	0	0	0	0	0	0	0	0	0	0	0	0	0	0	0	0									907	0	0	0	0	0	0	0	0	0	0	0	0	0	0	0	0	0	0	0
	908	0	0	0	0	0	0	0	0	0	0	0	0	0	0	0	0	0	0	0	0									908	0	0	0	0	0	0	0	0	0	0	0	0	0	0	0	0	0	0	0
	909	0	0	0	0	0	0	0	0	0	0	0	0	0	0	0	0	0	0	0	0									909	0	0	0	0	0	0	0	0	0	0	0	0	0	0	0	0	0	0	0
	910	0	0	0	0	0	0	0	0	0	0	0	0	0	0	0	0	0	0	0	0									910	0	0	0	0	0	0	0	0	0	0	0	0	0	0	0	0	0	0	0
	911	0	0	0	0	0	0	0	0	0	0	0	0	0	0	0	0	0	0	0	0									911	0	0	0	0	0	0	0	0	0	0	0	0	0	0	0	0	0	0	0
	912	0	0	0	0	0	0	0	0	0	0	0	0	0	0	0	0	0	0	0	0									912	0	0	0	0	0	0	0	0	0	0	0	0	0	0	0	0	0	0	0
	913	0	0	0	0	0	0	0	0	0	0	0	0	0	0	0	0	0	0	0	0									913	0	0	0	0	0	0	0	0	0	0	0	0	0	0	0	0	0	0	0
	914	0	0	0	0	0	0	0	0	0	0	0	0	0	0	0	0	0	0	0	0									914	0	0	0	0	0	0	0	0	0	0	0	0	0	0	0	0	0	0	0
	915	0	0	0	0	0	0	0	0	0	0	0	0	0	0	0	0	0	0	0	0									915	0	0	0	0	0	0	0	0	0	0	0	0	0	0	0	0	0	0	0
	916	0	0	0	0	0	0	0	0	0	0	0	0	0	0	0	0	0	0	0	0									916	0	0	0	0	0	0	0	0	0	0	0	0	0	0	0	0	0	0	0
	917	0	0	0	0	0	0	0	0	0	0	0	0	0	0	0	0	0	0	0	0									917	0	0	0	0	0	0	0	0	0	0	0	0	0	0	0	0	0	0	0
	918	0	0	0	0	0	0	0	0	0	0	0	0	0	0	0	0	0	0	0	0									918	0	0	0	0	0	0	0	0	0	0	0	0	0	0	0	0	0	0	0
	919	0	0	0	0	0	0	0	0	0	0	0	0	0	0	0	0	0	0	0	0									919	0	0	0	0	0	0	0	0	0	0	0	0	0	0	0	0	0	0	0
	920	0	0	0	0	0	0	0	0	0	0	0	0	0	0	0	0	0	0	0	0									920	0	0	0	0	0	0	0	0	0	0	0	0	0	0	0	0	0	0	0
	921	0	0	0	0	0	0	0	0	0	0	0	0	0	0	0	0	0	0	0	0									921	0	0	0	0	0	0	0	0	0	0	0	0	0	0	0	0	0	0	0
	922	0	0	0	0	0	0	0	0	0	0	0	0	0	0	0	0	0	0	0	0									922	0	0	0	0	0	0	0	0	0	0	0	0	0	0	0	0	0	0	0
	923	0	0	0	0	0	0	0	0	0	0	0	0	0	0	0	0	0	0	0	0									923	0	0	0	0	0	0	0	0	0	0	0	0	0	0	0	0	0	0	0
	924	0	0	0	0	0	0	0	0	0	0	0	0	0	0	0	0	0	0	0	0									924	0	0	0	0	0	0	0	0	0	0	0	0	0	0	0	0	0	0	0
	925	0	0	0	0	0	0	0	0	0	0	0	0	0	0	0	0	0	0	0	0									925	0	0	0	0	0	0	0	0	0	0	0	0	0	0	0	0	0	0	0
	926	0	0	0	0	0	0	0	0	0	0	0	0	0	0	0	0	0	0	0	0									926	0	0	0	0	0	0	0	0	0	0	0	0	0	0	0	0	0	0	0
	927	0	0	0	0	0	0	0	0	0	0	0	0	0	0	0	0	0	0	0	0									927	0	0	0	0	0	0	0	0	0	0	0	0	0	0	0	0	0	0	0
	928	0	0	0	0	0	0	0	0	0	0	0	0	0	0	0	0	0	0	0	0									928	0	0	0	0	0	0	0	0	0	0	0	0	0	0	0	0	0	0	0
	929	0	0	0	0	0	0	0	0	0	0	0	0	0	0	0	0	0	0	0	0									929	0	0	0	0	0	0	0	0	0	0	0	0	0	0	0	0	0	0	0
	930	0	0	0	0	0	0	0	0	0	0	0	0	0	0	0	0	0	0	0	0									930	0	0	0	0	0	0	0	0	0	0	0	0	0	0	0	0	0	0	0
	931	0	0	0	0	0	0	0	0	0	0	0	0	0	0	0	0	0	0	0	0									931	0	0	0	0	0	0	0	0	0	0	0	0	0	0	0	0	0	0	0
	932	0	0	0	0	0	0	0	0	0	0	0	0	0	0	0	0	0	0	0	0									932	0	0	0	0	0	0	0	0	0	0	0	0	0	0	0	0	0	0	0
	933	0	0	0	0	0	0	0	0	0	0	0	0	0	0	0	0	0	0	0	0									933	0	0	0	0	0	0	0	0	0	0	0	0	0	0	0	0	0	0	0
	934	0	0	0	0	0	0	0	0	0	0	0	0	0	0	0	0	0	0	0	0									934	0	0	0	0	0	0	0	0	0	0	0	0	0	0	0	0	0	0	0
	935	0	0	0	0	0	0	0	0	0	0	0	0	0	0	0	0	0	0	0	0									935	0	0	0	0	0	0	0	0	0	0	0	0	0	0	0	0	0	0	0
	936	0	0	0	0	0	0	0	0	0	0	0	0	0	0	0	0	0	0	0	0									936	0	0	0	0	0	0	0	0	0	0	0	0	0	0	0	0	0	0	0
	937	0	0	0	0	0	0	0	0	0	0	0	0	0	0	0	0	0	0	0	0									937	0	0	0	0	0	0	0	0	0	0	0	0	0	0	0	0	0	0	0
	938	0	0	0	0	0	0	0	0	0	0	0	0	0	0	0	0	0	0	0	0									938	0	0	0	0	0	0	0	0	0	0	0	0	0	0	0	0	0	0	0
	939	0	0	0	0	0	0	0	0	0	0	0	0	0	0	0	0	0	0	0	0									939	0	0	0	0	0	0	0	0	0	0	0	0	0	0	0	0	0	0	0
	940	0	0	0	0	0	0	0	0	0	0	0	0	0	0	0	0	0	0	0	0									940	0	0	0	0	0	0	0	0	0	0	0	0	0	0	0	0	0	0	0
	941	0	0	0	0	0	0	0	0	0	0	0	0	0	0	0	0	0	0	0	0									941	0	0	0	0	0	0	0	0	0	0	0	0	0	0	0	0	0	0	0
	942	0	0	0	0	0	0	0	0	0	0	0	0	0	0	0	0	0	0	0	0									942	0	0	0	0	0	0	0	0	0	0	0	0	0	0	0	0	0	0	0
	943	0	0	0	0	0	0	0	0	0	0	0	0	0	0	0	0	0	0	0	0									943	0	0	0	0	0	0	0	0	0	0	0	0	0	0	0	0	0	0	0
	944	0	0	0	0	0	0	0	0	0	0	0	0	0	0	0	0	0	0	0	0									944	0	0	0	0	0	0	0	0	0	0	0	0	0	0	0	0	0	0	0
	945	0	0	0	0	0	0	0	0	0	0	0	0	0	0	0	0	0	0	0	0									945	0	0	0	0	0	0	0	0	0	0	0	0	0	0	0	0	0	0	0
	946	0	0	0	0	0	0	0	0	0	0	0	0	0	0	0	0	0	0	0	0									946	0	0	0	0	0	0	0	0	0	0	0	0	0	0	0	0	0	0	0
	947	0	0	0	0	0	0	0	0	0	0	0	0	0	0	0	0	0	0	0	0									947	0	0	0	0	0	0	0	0	0	0	0	0	0	0	0	0	0	0	0
	948	0	0	0	0	0	0	0	0	0	0	0	0	0	0	0	0	0	0	0	0									948	0	0	0	0	0	0	0	0	0	0	0	0	0	0	0	0	0	0	0
	949	0	0	0	0	0	0	0	0	0	0	0	0	0	0	0	0	0	0	0	0									949	0	0	0	0	0	0	0	0	0	0	0	0	0	0	0	0	0	0	0
	950	0	0	0	0	0	0	0	0	0	0	0	0	0	0	0	0	0	0	0	0									950	0	0	0	0	0	0	0	0	0	0	0	0	0	0	0	0	0	0	0
	951	0	0	0	0	0	0	0	0	0	0	0	0	0	0	0	0	0	0	0	0									951	0	0	0	0	0	0	0	0	0	0	0	0	0	0	0	0	0	0	0
	952	0	0	0	0	0	0	0	0	0	0	0	0	0	0	0	0	0	0	0	0									952	0	0	0	0	0	0	0	0	0	0	0	0	0	0	0	0	0	0	0
	953	0	0	0	0	0	0	0	0	0	0	0	0	0	0	0	0	0	0	0	0									953	0	0	0	0	0	0	0	0	0	0	0	0	0	0	0	0	0	0	0
	954	0	0	0	0	0	0	0	0	0	0	0	0	0	0	0	0	0	0	0	0									954	0	0	0	0	0	0	0	0	0	0	0	0	0	0	0	0	0	0	0
	955	0	0	0	0	0	0	0	0	0	0	0	0	0	0	0	0	0	0	0	0									955	0	0	0	0	0	0	0	0	0	0	0	0	0	0	0	0	0	0	0
	956	0	0	0	0	0	0	0	0	0	0	0	0	0	0	0	0	0	0	0	0									956	0	0	0	0	0	0	0	0	0	0	0	0	0	0	0	0	0	0	0
	957	0	0	0	0	0	0	0	0	0	0	0	0	0	0	0	0	0	0	0	0									957	0	0	0	0	0	0	0	0	0	0	0	0	0	0	0	0	0	0	0
	958	0	0	0	0	0	0	0	0	0	0	0	0	0	0	0	0	0	0	0	0									958	0	0	0	0	0	0	0	0	0	0	0	0	0	0	0	0	0	0	0
	959	0	0	0	0	0	0	0	0	0	0	0	0	0	0	0	0	0	0	0	0									959	0	0	0	0	0	0	0	0	0	0	0	0	0	0	0	0	0	0	0
	960	0	0	0	0	0	0	0	0	0	0	0	0	0	0	0	0	0	0	0	0									960	0	0	0	0	0	0	0	0	0	0	0	0	0	0	0	0	0	0	0
	961	0	0	0	0	0	0	0	0	0	0	0	0	0	0	0	0	0	0	0	0									961	0	0	0	0	0	0	0	0	0	0	0	0	0	0	0	0	0	0	0
	962	0	0	0	0	0	0	0	0	0	0	0	0	0	0	0	0	0	0	0	0									962	0	0	0	0	0	0	0	0	0	0	0	0	0	0	0	0	0	0	0
	963	0	0	0	0	0	0	0	0	0	0	0	0	0	0	0	0	0	0	0	0									963	0	0	0	0	0	0	0	0	0	0	0	0	0	0	0	0	0	0	0
	964	0	0	0	0	0	0	0	0	0	0	0	0	0	0	0	0	0	0	0	0									964	0	0	0	0	0	0	0	0	0	0	0	0	0	0	0	0	0	0	0
	965	0	0	0	0	0	0	0	0	0	0	0	0	0	0	0	0	0	0	0	0									965	0	0	0	0	0	0	0	0	0	0	0	0	0	0	0	0	0	0	0
	966	0	0	0	0	0	0	0	0	0	0	0	0	0	0	0	0	0	0	0	0									966	0	0	0	0	0	0	0	0	0	0	0	0	0	0	0	0	0	0	0
	967	0	0	0	0	0	0	0	0	0	0	0	0	0	0	0	0	0	0	0	0									967	0	0	0	0	0	0	0	0	0	0	0	0	0	0	0	0	0	0	0
	968	0	0	0	0	0	0	0	0	0	0	0	0	0	0	0	0	0	0	0	0									968	0	0	0	0	0	0	0	0	0	0	0	0	0	0	0	0	0	0	0
	969	0	0	0	0	0	0	0	0	0	0	0	0	0	0	0	0	0	0	0	0									969	0	0	0	0	0	0	0	0	0	0	0	0	0	0	0	0	0	0	0
	970	0	0	0	0	0	0	0	0	0	0	0	0	0	0	0	0	0	0	0	0									970	0	0	0	0	0	0	0	0	0	0	0	0	0	0	0	0	0	0	0
	971	0	0	0	0	0	0	0	0	0	0	0	0	0	0	0	0	0	0	0	0									971	0	0	0	0	0	0	0	0	0	0	0	0	0	0	0	0	0	0	0
	972	0	0	0	0	0	0	0	0	0	0	0	0	0	0	0	0	0	0	0	0									972	0	0	0	0	0	0	0	0	0	0	0	0	0	0	0	0	0	0	0
	973	0	0	0	0	0	0	0	0	0	0	0	0	0	0	0	0	0	0	0	0									973	0	0	0	0	0	0	0	0	0	0	0	0	0	0	0	0	0	0	0
	974	0	0	0	0	0	0	0	0	0	0	0	0	0	0	0	0	0	0	0	0									974	0	0	0	0	0	0	0	0	0	0	0	0	0	0	0	0	0	0	0
	975	0	0	0	0	0	0	0	0	0	0	0	0	0	0	0	0	0	0	0	0									975	0	0	0	0	0	0	0	0	0	0	0	0	0	0	0	0	0	0	0
	976	0	0	0	0	0	0	0	0	0	0	0	0	0	0	0	0	0	0	0	0									976	0	0	0	0	0	0	0	0	0	0	0	0	0	0	0	0	0	0	0
	977	0	0	0	0	0	0	0	0	0	0	0	0	0	0	0	0	0	0	0	0									977	0	0	0	0	0	0	0	0	0	0	0	0	0	0	0	0	0	0	0
	978	0	0	0	0	0	0	0	0	0	0	0	0	0	0	0	0	0	0	0	0									978	0	0	0	0	0	0	0	0	0	0	0	0	0	0	0	0	0	0	0
	979	0	0	0	0	0	0	0	0	0	0	0	0	0	0	0	0	0	0	0	0									979	0	0	0	0	0	0	0	0	0	0	0	0	0	0	0	0	0	0	0
	980	0	0	0	0	0	0	0	0	0	0	0	0	0	0	0	0	0	0	0	0									980	0	0	0	0	0	0	0	0	0	0	0	0	0	0	0	0	0	0	0
	981	0	0	0	0	0	0	0	0	0	0	0	0	0	0	0	0	0	0	0	0									981	0	0	0	0	0	0	0	0	0	0	0	0	0	0	0	0	0	0	0
	982	0	0	0	0	0	0	0	0	0	0	0	0	0	0	0	0	0	0	0	0									982	0	0	0	0	0	0	0	0	0	0	0	0	0	0	0	0	0	0	0
	983	0	0	0	0	0	0	0	0	0	0	0	0	0	0	0	0	0	0	0	0									983	0	0	0	0	0	0	0	0	0	0	0	0	0	0	0	0	0	0	0
	984	0	0	0	0	0	0	0	0	0	0	0	0	0	0	0	0	0	0	0	0									984	0	0	0	0	0	0	0	0	0	0	0	0	0	0	0	0	0	0	0
	985	0	0	0	0	0	0	0	0	0	0	0	0	0	0	0	0	0	0	0	0									985	0	0	0	0	0	0	0	0	0	0	0	0	0	0	0	0	0	0	0
	986	0	0	0	0	0	0	0	0	0	0	0	0	0	0	0	0	0	0	0	0									986	0	0	0	0	0	0	0	0	0	0	0	0	0	0	0	0	0	0	0
	987	0	0	0	0	0	0	0	0	0	0	0	0	0	0	0	0	0	0	0	0									987	0	0	0	0	0	0	0	0	0	0	0	0	0	0	0	0	0	0	0
	988	0	0	0	0	0	0	0	0	0	0	0	0	0	0	0	0	0	0	0	0									988	0	0	0	0	0	0	0	0	0	0	0	0	0	0	0	0	0	0	0
	989	0	0	0	0	0	0	0	0	0	0	0	0	0	0	0	0	0	0	0	0									989	0	0	0	0	0	0	0	0	0	0	0	0	0	0	0	0	0	0	0
	990	0	0	0	0	0	0	0	0	0	0	0	0	0	0	0	0	0	0	0	0									990	0	0	0	0	0	0	0	0	0	0	0	0	0	0	0	0	0	0	0
	991	0	0	0	0	0	0	0	0	0	0	0	0	0	0	0	0	0	0	0	0									991	0	0	0	0	0	0	0	0	0	0	0	0	0	0	0	0	0	0	0
	992	0	0	0	0	0	0	0	0	0	0	0	0	0	0	0	0	0	0	0	0									992	0	0	0	0	0	0	0	0	0	0	0	0	0	0	0	0	0	0	0
	993	0	0	0	0	0	0	0	0	0	0	0	0	0	0	0	0	0	0	0	0									993	0	0	0	0	0	0	0	0	0	0	0	0	0	0	0	0	0	0	0
	994	0	0	0	0	0	0	0	0	0	0	0	0	0	0	0	0	0	0	0	0									994	0	0	0	0	0	0	0	0	0	0	0	0	0	0	0	0	0	0	0
	995	0	0	0	0	0	0	0	0	0	0	0	0	0	0	0	0	0	0	0	0									995	0	0	0	0	0	0	0	0	0	0	0	0	0	0	0	0	0	0	0
	996	0	0	0	0	0	0	0	0	0	0	0	0	0	0	0	0	0	0	0	0									996	0	0	0	0	0	0	0	0	0	0	0	0	0	0	0	0	0	0	0
	997	0	0	0	0	0	0	0	0	0	0	0	0	0	0	0	0	0	0	0	0									997	0	0	0	0	0	0	0	0	0	0	0	0	0	0	0	0	0	0	0
	998	0	0	0	0	0	0	0	0	0	0	0	0	0	0	0	0	0	0	0	0									998	0	0	0	0	0	0	0	0	0	0	0	0	0	0	0	0	0	0	0
	999	0	0	0	0	0	0	0	0	0	0	0	0	0	0	0	0	0	0	0	0									999	0	0	0	0	0	0	0	0	0	0	0	0	0	0	0	0	0	0	0
	1000	0	0	0	0	0	0	0	0	0	0	0	0	0	0	0	0	0	0	0	0									1000	0	0	0	0	0	0	0	0	0	0	0	0	0	0	0	0	0	0	0
	1001	0	0	0	0	0	0	0	0	0	0	0	0	0	0	0	0	0	0	0	0									1001	0	0	0	0	0	0	0	0	0	0	0	0	0	0	0	0	0	0	0
	1002	0	0	0	0	0	0	0	0	0	0	0	0	0	0	0	0	0	0	0	0									1002	0	0	0	0	0	0	0	0	0	0	0	0	0	0	0	0	0	0	0
	1003	0	0	0	0	0	0	0	0	0	0	0	0	0	0	0	0	0	0	0	0									1003	0	0	0	0	0	0	0	0	0	0	0	0	0	0	0	0	0	0	0
	1004	0	0	0	0	0	0	0	0	0	0	0	0	0	0	0	0	0	0	0	0									1004	0	0	0	0	0	0	0	0	0	0	0	0	0	0	0	0	0	0	0
	1005	0	0	0	0	0	0	0	0	0	0	0	0	0	0	0	0	0	0	0	0									1005	0	0	0	0	0	0	0	0	0	0	0	0	0	0	0	0	0	0	0
	1006	0	0	0	0	0	0	0	0	0	0	0	0	0	0	0	0	0	0	0	0									1006	0	0	0	0	0	0	0	0	0	0	0	0	0	0	0	0	0	0	0
	1007	0	0	0	0	0	0	0	0	0	0	0	0	0	0	0	0	0	0	0	0									1007	0	0	0	0	0	0	0	0	0	0	0	0	0	0	0	0	0	0	0
	1008	0	0	0	0	0	0	0	0	0	0	0	0	0	0	0	0	0	0	0	0									1008	0	0	0	0	0	0	0	0	0	0	0	0	0	0	0	0	0	0	0
	1009	0	0	0	0	0	0	0	0	0	0	0	0	0	0	0	0	0	0	0	0									1009	0	0	0	0	0	0	0	0	0	0	0	0	0	0	0	0	0	0	0
	1010	0	0	0	0	0	0	0	0	0	0	0	0	0	0	0	0	0	0	0	0									1010	0	0	0	0	0	0	0	0	0	0	0	0	0	0	0	0	0	0	0
	1011	0	0	0	0	0	0	0	0	0	0	0	0	0	0	0	0	0	0	0	0									1011	0	0	0	0	0	0	0	0	0	0	0	0	0	0	0	0	0	0	0
	1012	0	0	0	0	0	0	0	0	0	0	0	0	0	0	0	0	0	0	0	0									1012	0	0	0	0	0	0	0	0	0	0	0	0	0	0	0	0	0	0	0
	1013	0	0	0	0	0	0	0	0	0	0	0	0	0	0	0	0	0	0	0	0									1013	0	0	0	0	0	0	0	0	0	0	0	0	0	0	0	0	0	0	0
	1014	0	0	0	0	0	0	0	0	0	0	0	0	0	0	0	0	0	0	0	0									1014	0	0	0	0	0	0	0	0	0	0	0	0	0	0	0	0	0	0	0
	1015	0	0	0	0	0	0	0	0	0	0	0	0	0	0	0	0	0	0	0	0									1015	0	0	0	0	0	0	0	0	0	0	0	0	0	0	0	0	0	0	0
	1016	0	0	0	0	0	0	0	0	0	0	0	0	0	0	0	0	0	0	0	0									1016	0	0	0	0	0	0	0	0	0	0	0	0	0	0	0	0	0	0	0
	1017	0	0	0	0	0	0	0	0	0	0	0	0	0	0	0	0	0	0	0	0									1017	0	0	0	0	0	0	0	0	0	0	0	0	0	0	0	0	0	0	0
	1018	0	0	0	0	0	0	0	0	0	0	0	0	0	0	0	0	0	0	0	0									1018	0	0	0	0	0	0	0	0	0	0	0	0	0	0	0	0	0	0	0
	1019	0	0	0	0	0	0	0	0	0	0	0	0	0	0	0	0	0	0	0	0									1019	0	0	0	0	0	0	0	0	0	0	0	0	0	0	0	0	0	0	0
	1020	0	0	0	0	0	0	0	0	0	0	0	0	0	0	0	0	0	0	0	0									1020	0	0	0	0	0	0	0	0	0	0	0	0	0	0	0	0	0	0	0
	1021	0	0	0	0	0	0	0	0	0	0	0	0	0	0	0	0	0	0	0	0									1021	0	0	0	0	0	0	0	0	0	0	0	0	0	0	0	0	0	0	0
	1022	0	0	0	0	0	0	0	0	0	0	0	0	0	0	0	0	0	0	0	0									1022	0	0	0	0	0	0	0	0	0	0	0	0	0	0	0	0	0	0	0
	1023	0	0	0	0	0	0	0	0	0	0	0	0	0	0	0	0	0	0	0	0									1023	0	0	0	0	0	0	0	0	0	0	0	0	0	0	0	0	0	0	0
	1024	0	0	0	0	0	0	0	0	0	0	0	0	0	0	0	0	0	0	0	0									1024	0	0	0	0	0	0	0	0	0	0	0	0	0	0	0	0	0	0	0
	1025	0	0	0	0	0	0	0	0	0	0	0	0	0	0	0	0	0	0	0	0									1025	0	0	0	0	0	0	0	0	0	0	0	0	0	0	0	0	0	0	0
	1026	0	0	0	0	0	0	0	0	0	0	0	0	0	0	0	0	0	0	0	0									1026	0	0	0	0	0	0	0	0	0	0	0	0	0	0	0	0	0	0	0
	1027	0	0	0	0	0	0	0	0	0	0	0	0	0	0	0	0	0	0	0	0									1027	0	0	0	0	0	0	0	0	0	0	0	0	0	0	0	0	0	0	0
	1028	0	0	0	0	0	0	0	0	0	0	0	0	0	0	0	0	0	0	0	0									1028	0	0	0	0	0	0	0	0	0	0	0	0	0	0	0	0	0	0	0
	1029	0	0	0	0	0	0	0	0	0	0	0	0	0	0	0	0	0	0	0	0									1029	0	0	0	0	0	0	0	0	0	0	0	0	0	0	0	0	0	0	0
	1030	0	0	0	0	0	0	0	0	0	0	0	0	0	0	0	0	0	0	0	0									1030	0	0	0	0	0	0	0	0	0	0	0	0	0	0	0	0	0	0	0
	1031	0	0	0	0	0	0	0	0	0	0	0	0	0	0	0	0	0	0	0	0									1031	0	0	0	0	0	0	0	0	0	0	0	0	0	0	0	0	0	0	0
	1032	0	0	0	0	0	0	0	0	0	0	0	0	0	0	0	0	0	0	0	0									1032	0	0	0	0	0	0	0	0	0	0	0	0	0	0	0	0	0	0	0
	1033	0	0	0	0	0	0	0	0	0	0	0	0	0	0	0	0	0	0	0	0									1033	0	0	0	0	0	0	0	0	0	0	0	0	0	0	0	0	0	0	0
	1034	0	0	0	0	0	0	0	0	0	0	0	0	0	0	0	0	0	0	0	0									1034	0	0	0	0	0	0	0	0	0	0	0	0	0	0	0	0	0	0	0
	1035	0	0	0	0	0	0	0	0	0	0	0	0	0	0	0	0	0	0	0	0									1035	0	0	0	0	0	0	0	0	0	0	0	0	0	0	0	0	0	0	0
	1036	0	0	0	0	0	0	0	0	0	0	0	0	0	0	0	0	0	0	0	0									1036	0	0	0	0	0	0	0	0	0	0	0	0	0	0	0	0	0	0	0
	1037	0	0	0	0	0	0	0	0	0	0	0	0	0	0	0	0	0	0	0	0									1037	0	0	0	0	0	0	0	0	0	0	0	0	0	0	0	0	0	0	0
	1038	0	0	0	0	0	0	0	0	0	0	0	0	0	0	0	0	0	0	0	0									1038	0	0	0	0	0	0	0	0	0	0	0	0	0	0	0	0	0	0	0
	1039	0	0	0	0	0	0	0	0	0	0	0	0	0	0	0	0	0	0	0	0									1039	0	0	0	0	0	0	0	0	0	0	0	0	0	0	0	0	0	0	0
	1040	0	0	0	0	0	0	0	0	0	0	0	0	0	0	0	0	0	0	0	0									1040	0	0	0	0	0	0	0	0	0	0	0	0	0	0	0	0	0	0	0
	1041	0	0	0	0	0	0	0	0	0	0	0	0	0	0	0	0	0	0	0	0									1041	0	0	0	0	0	0	0	0	0	0	0	0	0	0	0	0	0	0	0
	1042	0	0	0	0	0	0	0	0	0	0	0	0	0	0	0	0	0	0	0	0									1042	0	0	0	0	0	0	0	0	0	0	0	0	0	0	0	0	0	0	0
	1043	0	0	0	0	0	0	0	0	0	0	0	0	0	0	0	0	0	0	0	0									1043	0	0	0	0	0	0	0	0	0	0	0	0	0	0	0	0	0	0	0
	1044	0	0	0	0	0	0	0	0	0	0	0	0	0	0	0	0	0	0	0	0									1044	0	0	0	0	0	0	0	0	0	0	0	0	0	0	0	0	0	0	0
	1045	0	0	0	0	0	0	0	0	0	0	0	0	0	0	0	0	0	0	0	0									1045	0	0	0	0	0	0	0	0	0	0	0	0	0	0	0	0	0	0	0
	1046	0	0	0	0	0	0	0	0	0	0	0	0	0	0	0	0	0	0	0	0									1046	0	0	0	0	0	0	0	0	0	0	0	0	0	0	0	0	0	0	0
	1047	0	0	0	0	0	0	0	0	0	0	0	0	0	0	0	0	0	0	0	0									1047	0	0	0	0	0	0	0	0	0	0	0	0	0	0	0	0	0	0	0
	1048	0	0	0	0	0	0	0	0	0	0	0	0	0	0	0	0	0	0	0	0									1048	0	0	0	0	0	0	0	0	0	0	0	0	0	0	0	0	0	0	0
	1049	0	0	0	0	0	0	0	0	0	0	0	0	0	0	0	0	0	0	0	0									1049	0	0	0	0	0	0	0	0	0	0	0	0	0	0	0	0	0	0	0
	1050	0	0	0	0	0	0	0	0	0	0	0	0	0	0	0	0	0	0	0	0									1050	0	0	0	0	0	0	0	0	0	0	0	0	0	0	0	0	0	0	0
	1051	0	0	0	0	0	0	0	0	0	0	0	0	0	0	0	0	0	0	0	0									1051	0	0	0	0	0	0	0	0	0	0	0	0	0	0	0	0	0	0	0
	1052	0	0	0	0	0	0	0	0	0	0	0	0	0	0	0	0	0	0	0	0									1052	0	0	0	0	0	0	0	0	0	0	0	0	0	0	0	0	0	0	0
	1053	0	0	0	0	0	0	0	0	0	0	0	0	0	0	0	0	0	0	0	0									1053	0	0	0	0	0	0	0	0	0	0	0	0	0	0	0	0	0	0	0
	1054	0	0	0	0	0	0	0	0	0	0	0	0	0	0	0	0	0	0	0	0									1054	0	0	0	0	0	0	0	0	0	0	0	0	0	0	0	0	0	0	0
	1055	0	0	0	0	0	0	0	0	0	0	0	0	0	0	0	0	0	0	0	0									1055	0	0	0	0	0	0	0	0	0	0	0	0	0	0	0	0	0	0	0
	1056	0	0	0	0	0	0	0	0	0	0	0	0	0	0	0	0	0	0	0	0									1056	0	0	0	0	0	0	0	0	0	0	0	0	0	0	0	0	0	0	0
	1057	0	0	0	0	0	0	0	0	0	0	0	0	0	0	0	0	0	0	0	0									1057	0	0	0	0	0	0	0	0	0	0	0	0	0	0	0	0	0	0	0
	1058	0	0	0	0	0	0	0	0	0	0	0	0	0	0	0	0	0	0	0	0									1058	0	0	0	0	0	0	0	0	0	0	0	0	0	0	0	0	0	0	0
	1059	0	0	0	0	0	0	0	0	0	0	0	0	0	0	0	0	0	0	0	0									1059	0	0	0	0	0	0	0	0	0	0	0	0	0	0	0	0	0	0	0
	1060	0	0	0	0	0	0	0	0	0	0	0	0	0	0	0	0	0	0	0	0									1060	0	0	0	0	0	0	0	0	0	0	0	0	0	0	0	0	0	0	0
	1061	0	0	0	0	0	0	0	0	0	0	0	0	0	0	0	0	0	0	0	0									1061	0	0	0	0	0	0	0	0	0	0	0	0	0	0	0	0	0	0	0
	1062	0	0	0	0	0	0	0	0	0	0	0	0	0	0	0	0	0	0	0	0									1062	0	0	0	0	0	0	0	0	0	0	0	0	0	0	0	0	0	0	0
	1063	0	0	0	0	0	0	0	0	0	0	0	0	0	0	0	0	0	0	0	0									1063	0	0	0	0	0	0	0	0	0	0	0	0	0	0	0	0	0	0	0
	1064	0	0	0	0	0	0	0	0	0	0	0	0	0	0	0	0	0	0	0	0									1064	0	0	0	0	0	0	0	0	0	0	0	0	0	0	0	0	0	0	0
	1065	0	0	0	0	0	0	0	0	0	0	0	0	0	0	0	0	0	0	0	0									1065	0	0	0	0	0	0	0	0	0	0	0	0	0	0	0	0	0	0	0
	1066	0	0	0	0	0	0	0	0	0	0	0	0	0	0	0	0	0	0	0	0									1066	0	0	0	0	0	0	0	0	0	0	0	0	0	0	0	0	0	0	0
	1067	0	0	0	0	0	0	0	0	0	0	0	0	0	0	0	0	0	0	0	0									1067	0	0	0	0	0	0	0	0	0	0	0	0	0	0	0	0	0	0	0
	1068	0	0	0	0	0	0	0	0	0	0	0	0	0	0	0	0	0	0	0	0									1068	0	0	0	0	0	0	0	0	0	0	0	0	0	0	0	0	0	0	0
	1069	0	0	0	0	0	0	0	0	0	0	0	0	0	0	0	0	0	0	0	0									1069	0	0	0	0	0	0	0	0	0	0	0	0	0	0	0	0	0	0	0
	1070	0	0	0	0	0	0	0	0	0	0	0	0	0	0	0	0	0	0	0	0
	1071	0	0	0	0	0	0	0	0	0	0	0	0	0	0	0	0	0	0	0	0
	1072	0	0	0	0	0	0	0	0	0	0	0	0	0	0	0	0	0	0	0	0
	1073	0	0	0	0	0	0	0	0	0	0	0	0	0	0	0	0	0	0	0	0
	1074	0	0	0	0	0	0	0	0	0	0	0	0	0	0	0	0	0	0	0	0
	1075	0	0	0	0	0	0	0	0	0	0	0	0	0	0	0	0	0	0	0	0
	1076	0	0	0	0	0	0	0	0	0	0	0	0	0	0	0	0	0	0	0	0
	1077	0	0	0	0	0	0	0	0	0	0	0	0	0	0	0	0	0	0	0	0
	1078	0	0	0	0	0	0	0	0	0	0	0	0	0	0	0	0	0	0	0	0
	1079	0	0	0	0	0	0	0	0	0	0	0	0	0	0	0	0	0	0	0	0
	1080	0	0	0	0	0	0	0	0	0	0	0	0	0	0	0	0	0	0	0	0
	1081	0	0	0	0	0	0	0	0	0	0	0	0	0	0	0	0	0	0	0	0
	1082	0	0	0	0	0	0	0	0	0	0	0	0	0	0	0	0	0	0	0	0
	1083	0	0	0	0	0	0	0	0	0	0	0	0	0	0	0	0	0	0	0	0
	1084	0	0	0	0	0	0	0	0	0	0	0	0	0	0	0	0	0	0	0	0
	1085	0	0	0	0	0	0	0	0	0	0	0	0	0	0	0	0	0	0	0	0
	1086	0	0	0	0	0	0	0	0	0	0	0	0	0	0	0	0	0	0	0	0
	1087	0	0	0	0	0	0	0	0	0	0	0	0	0	0	0	0	0	0	0	0
	1088	0	0	0	0	0	0	0	0	0	0	0	0	0	0	0	0	0	0	0	0
	1089	0	0	0	0	0	0	0	0	0	0	0	0	0	0	0	0	0	0	0	0
	1090	0	0	0	0	0	0	0	0	0	0	0	0	0	0	0	0	0	0	0	0
	1091	0	0	0	0	0	0	0	0	0	0	0	0	0	0	0	0	0	0	0	0
	1092	0	0	0	0	0	0	0	0	0	0	0	0	0	0	0	0	0	0	0	0
	1093	0	0	0	0	0	0	0	0	0	0	0	0	0	0	0	0	0	0	0	0
	1094	0	0	0	0	0	0	0	0	0	0	0	0	0	0	0	0	0	0	0	0
	1095	0	0	0	0	0	0	0	0	0	0	0	0	0	0	0	0	0	0	0	0
	1096	0	0	0	0	0	0	0	0	0	0	0	0	0	0	0	0	0	0	0	0
	1097	0	0	0	0	0	0	0	0	0	0	0	0	0	0	0	0	0	0	0	0
	1098	0	0	0	0	0	0	0	0	0	0	0	0	0	0	0	0	0	0	0	0
	1099	0	0	0	0	0	0	0	0	0	0	0	0	0	0	0	0	0	0	0	0
	1100	0	0	0	0	0	0	0	0	0	0	0	0	0	0	0	0	0	0	0	0
	1101	0	0	0	0	0	0	0	0	0	0	0	0	0	0	0	0	0	0	0	0
	1102	0	0	0	0	0	0	0	0	0	0	0	0	0	0	0	0	0	0	0	0
	1103	0	0	0	0	0	0	0	0	0	0	0	0	0	0	0	0	0	0	0	0
	1104	0	0	0	0	0	0	0	0	0	0	0	0	0	0	0	0	0	0	0	0
	1105	0	0	0	0	0	0	0	0	0	0	0	0	0	0	0	0	0	0	0	0
	1106	0	0	0	0	0	0	0	0	0	0	0	0	0	0	0	0	0	0	0	0
	1107	0	0	0	0	0	0	0	0	0	0	0	0	0	0	0	0	0	0	0	0
	1108	0	0	0	0	0	0	0	0	0	0	0	0	0	0	0	0	0	0	0	0
	1109	0	0	0	0	0	0	0	0	0	0	0	0	0	0	0	0	0	0	0	0
	1110	0	0	0	0	0	0	0	0	0	0	0	0	0	0	0	0	0	0	0	0
	1111	0	0	0	0	0	0	0	0	0	0	0	0	0	0	0	0	0	0	0	0
	1112	0	0	0	0	0	0	0	0	0	0	0	0	0	0	0	0	0	0	0	0
	1113	0	0	0	0	0	0	0	0	0	0	0	0	0	0	0	0	0	0	0	0
	1114	0	0	0	0	0	0	0	0	0	0	0	0	0	0	0	0	0	0	0	0
	1115	0	0	0	0	0	0	0	0	0	0	0	0	0	0	0	0	0	0	0	0
	1116	0	0	0	0	0	0	0	0	0	0	0	0	0	0	0	0	0	0	0	0
	1117	0	0	0	0	0	0	0	0	0	0	0	0	0	0	0	0	0	0	0	0
	1118	0	0	0	0	0	0	0	0	0	0	0	0	0	0	0	0	0	0	0	0
	1119	0	0	0	0	0	0	0	0	0	0	0	0	0	0	0	0	0	0	0	0
	1120	0	0	0	0	0	0	0	0	0	0	0	0	0	0	0	0	0	0	0	0
	1121	0	0	0	0	0	0	0	0	0	0	0	0	0	0	0	0	0	0	0	0
	1122	0	0	0	0	0	0	0	0	0	0	0	0	0	0	0	0	0	0	0	0
	1123	0	0	0	0	0	0	0	0	0	0	0	0	0	0	0	0	0	0	0	0
	1124	0	0	0	0	0	0	0	0	0	0	0	0	0	0	0	0	0	0	0	0
	1125	0	0	0	0	0	0	0	0	0	0	0	0	0	0	0	0	0	0	0	0
	1126	0	0	0	0	0	0	0	0	0	0	0	0	0	0	0	0	0	0	0	0
	1127	0	0	0	0	0	0	0	0	0	0	0	0	0	0	0	0	0	0	0	0
	1128	0	0	0	0	0	0	0	0	0	0	0	0	0	0	0	0	0	0	0	0
	1129	0	0	0	0	0	0	0	0	0	0	0	0	0	0	0	0	0	0	0	0
	1130	0	0	0	0	0	0	0	0	0	0	0	0	0	0	0	0	0	0	0	0
	1131	0	0	0	0	0	0	0	0	0	0	0	0	0	0	0	0	0	0	0	0
	1132	0	0	0	0	0	0	0	0	0	0	0	0	0	0	0	0	0	0	0	0
	1133	0	0	0	0	0	0	0	0	0	0	0	0	0	0	0	0	0	0	0	0
	1134	0	0	0	0	0	0	0	0	0	0	0	0	0	0	0	0	0	0	0	0
	1135	0	0	0	0	0	0	0	0	0	0	0	0	0	0	0	0	0	0	0	0
	1136	0	0	0	0	0	0	0	0	0	0	0	0	0	0	0	0	0	0	0	0
	1137	0	0	0	0	0	0	0	0	0	0	0	0	0	0	0	0	0	0	0	0
	1138	0	0	0	0	0	0	0	0	0	0	0	0	0	0	0	0	0	0	0	0
	1139	0	0	0	0	0	0	0	0	0	0	0	0	0	0	0	0	0	0	0	0
	1140	0	0	0	0	0	0	0	0	0	0	0	0	0	0	0	0	0	0	0	0
	1141	0	0	0	0	0	0	0	0	0	0	0	0	0	0	0	0	0	0	0	0
	1142	0	0	0	0	0	0	0	0	0	0	0	0	0	0	0	0	0	0	0	0
	1143	0	0	0	0	0	0	0	0	0	0	0	0	0	0	0	0	0	0	0	0
	1144	0	0	0	0	0	0	0	0	0	0	0	0	0	0	0	0	0	0	0	0
	1145	0	0	0	0	0	0	0	0	0	0	0	0	0	0	0	0	0	0	0	0
	1146	0	0	0	0	0	0	0	0	0	0	0	0	0	0	0	0	0	0	0	0
	1147	0	0	0	0	0	0	0	0	0	0	0	0	0	0	0	0	0	0	0	0
	1148	0	0	0	0	0	0	0	0	0	0	0	0	0	0	0	0	0	0	0	0
	1149	0	0	0	0	0	0	0	0	0	0	0	0	0	0	0	0	0	0	0	0
	1150	0	0	0	0	0	0	0	0	0	0	0	0	0	0	0	0	0	0	0	0
	1151	0	0	0	0	0	0	0	0	0	0	0	0	0	0	0	0	0	0	0	0
	1152	0	0	0	0	0	0	0	0	0	0	0	0	0	0	0	0	0	0	0	0
	1153	0	0	0	0	0	0	0	0	0	0	0	0	0	0	0	0	0	0	0	0
	1154	0	0	0	0	0	0	0	0	0	0	0	0	0	0	0	0	0	0	0	0
	1155	0	0	0	0	0	0	0	0	0	0	0	0	0	0	0	0	0	0	0	0
	1156	0	0	0	0	0	0	0	0	0	0	0	0	0	0	0	0	0	0	0	0
	1157	0	0	0	0	0	0	0	0	0	0	0	0	0	0	0	0	0	0	0	0
	1158	0	0	0	0	0	0	0	0	0	0	0	0	0	0	0	0	0	0	0	0
	1159	0	0	0	0	0	0	0	0	0	0	0	0	0	0	0	0	0	0	0	0
	1160	0	0	0	0	0	0	0	0	0	0	0	0	0	0	0	0	0	0	0	0
	1161	0	0	0	0	0	0	0	0	0	0	0	0	0	0	0	0	0	0	0	0
	1162	0	0	0	0	0	0	0	0	0	0	0	0	0	0	0	0	0	0	0	0
	1163	0	0	0	0	0	0	0	0	0	0	0	0	0	0	0	0	0	0	0	0
	1164	0	0	0	0	0	0	0	0	0	0	0	0	0	0	0	0	0	0	0	0
	1165	0	0	0	0	0	0	0	0	0	0	0	0	0	0	0	0	0	0	0	0
	1166	0	0	0	0	0	0	0	0	0	0	0	0	0	0	0	0	0	0	0	0
	1167	0	0	0	0	0	0	0	0	0	0	0	0	0	0	0	0	0	0	0	0
	1168	0	0	0	0	0	0	0	0	0	0	0	0	0	0	0	0	0	0	0	0
	1169	0	0	0	0	0	0	0	0	0	0	0	0	0	0	0	0	0	0	0	0
	1170	0	0	0	0	0	0	0	0	0	0	0	0	0	0	0	0	0	0	0	0
	1171	0	0	0	0	0	0	0	0	0	0	0	0	0	0	0	0	0	0	0	0
	1172	0	0	0	0	0	0	0	0	0	0	0	0	0	0	0	0	0	0	0	0
	1173	0	0	0	0	0	0	0	0	0	0	0	0	0	0	0	0	0	0	0	0
	1174	0	0	0	0	0	0	0	0	0	0	0	0	0	0	0	0	0	0	0	0
	1175	0	0	0	0	0	0	0	0	0	0	0	0	0	0	0	0	0	0	0	0
	1176	0	0	0	0	0	0	0	0	0	0	0	0	0	0	0	0	0	0	0	0
	1177	0	0	0	0	0	0	0	0	0	0	0	0	0	0	0	0	0	0	0	0
	1178	0	0	0	0	0	0	0	0	0	0	0	0	0	0	0	0	0	0	0	0
	1179	0	0	0	0	0	0	0	0	0	0	0	0	0	0	0	0	0	0	0	0
	1180	0	0	0	0	0	0	0	0	0	0	0	0	0	0	0	0	0	0	0	0
	1181	0	0	0	0	0	0	0	0	0	0	0	0	0	0	0	0	0	0	0	0
	1182	0	0	0	0	0	0	0	0	0	0	0	0	0	0	0	0	0	0	0	0
	1183	0	0	0	0	0	0	0	0	0	0	0	0	0	0	0	0	0	0	0	0
	1184	0	0	0	0	0	0	0	0	0	0	0	0	0	0	0	0	0	0	0	0
	1185	0	0	0	0	0	0	0	0	0	0	0	0	0	0	0	0	0	0	0	0
	1186	0	0	0	0	0	0	0	0	0	0	0	0	0	0	0	0	0	0	0	0
	1187	0	0	0	0	0	0	0	0	0	0	0	0	0	0	0	0	0	0	0	0
	1188	0	0	0	0	0	0	0	0	0	0	0	0	0	0	0	0	0	0	0	0
	1189	0	0	0	0	0	0	0	0	0	0	0	0	0	0	0	0	0	0	0	0
	1190	0	0	0	0	0	0	0	0	0	0	0	0	0	0	0	0	0	0	0	0
	1191	0	0	0	0	0	0	0	0	0	0	0	0	0	0	0	0	0	0	0	0
	1192	0	0	0	0	0	0	0	0	0	0	0	0	0	0	0	0	0	0	0	0
	1193	0	0	0	0	0	0	0	0	0	0	0	0	0	0	0	0	0	0	0	0
	1194	0	0	0	0	0	0	0	0	0	0	0	0	0	0	0	0	0	0	0	0
	1195	0	0	0	0	0	0	0	0	0	0	0	0	0	0	0	0	0	0	0	0
	1196	0	0	0	0	0	0	0	0	0	0	0	0	0	0	0	0	0	0	0	0
	1197	0	0	0	0	0	0	0	0	0	0	0	0	0	0	0	0	0	0	0	0
	1198	0	0	0	0	0	0	0	0	0	0	0	0	0	0	0	0	0	0	0	0
	1199	0	0	0	0	0	0	0	0	0	0	0	0	0	0	0	0	0	0	0	0
	1200	0	0	0	0	0	0	0	0	0	0	0	0	0	0	0	0	0	0	0	0
	1201	0	0	0	0	0	0	0	0	0	0	0	0	0	0	0	0	0	0	0	0
	1202	0	0	0	0	0	0	0	0	0	0	0	0	0	0	0	0	0	0	0	0
	1203	0	0	0	0	0	0	0	0	0	0	0	0	0	0	0	0	0	0	0	0
	1204	0	0	0	0	0	0	0	0	0	0	0	0	0	0	0	0	0	0	0	0
	1205	0	0	0	0	0	0	0	0	0	0	0	0	0	0	0	0	0	0	0	0
	1206	0	0	0	0	0	0	0	0	0	0	0	0	0	0	0	0	0	0	0	0
	1207	0	0	0	0	0	0	0	0	0	0	0	0	0	0	0	0	0	0	0	0
	1208	0	0	0	0	0	0	0	0	0	0	0	0	0	0	0	0	0	0	0	0
	1209	0	0	0	0	0	0	0	0	0	0	0	0	0	0	0	0	0	0	0	0
	1210	0	0	0	0	0	0	0	0	0	0	0	0	0	0	0	0	0	0	0	0
	1211	0	0	0	0	0	0	0	0	0	0	0	0	0	0	0	0	0	0	0	0
	1212	0	0	0	0	0	0	0	0	0	0	0	0	0	0	0	0	0	0	0	0
	1213	0	0	0	0	0	0	0	0	0	0	0	0	0	0	0	0	0	0	0	0										0	0	0	0	0	0	0	0	0	0	0	0	0	0	0	0	0	0	0
	1214	0	0	0	0	0	0	0	0	0	0	0	0	0	0	0	0	0	0	0	0										0	0	0	0	0	0	0	0	0	0	0	0	0	0	0	0	0	0	0
	1215	0	0	0	0	0	0	0	0	0	0	0	0	0	0	0	0	0	0	0	0										0	0	0	0	0	0	0	0	0	0	0	0	0	0	0	0	0	0	0
	1216	0	0	0	0	0	0	0	0	0	0	0	0	0	0	0	0	0	0	0	0										0	0	0	0	0	0	0	0	0	0	0	0	0	0	0	0	0	0	0
	1217	0	0	0	0	0	0	0	0	0	0	0	0	0	0	0	0	0	0	0	0										0	0	0	0	0	0	0	0	0	0	0	0	0	0	0	0	0	0	0
																															0	0	0	0	0	0	0	0	0	0	0	0	0	0	0	0	0	0	0
SUM	609	345.49	636.53	19551	2249.59	10338	-5506	0	0	0	0	0	0	0	0	0	0	0	0	0	0									571915	9168.8	18022.8	611006	67685.7	362755	-121372	0	0	0	0	0	0	0	0	0	0	0	0	0
CN X SUM OF ELEM.		8982.74	16549.8	508326	58489.2	268788	-143156	0	0	0	0	0	0	0	0	0	0	0	0	0	0
		7	8	9	10	11	12	13	14	15	16	17	18	19	20	21	22	23	24	25	26
	SC	0.979707	0.91827	0.831949	0.864129	0.740963	1.17948	#DIV/0!	#DIV/0!	#DIV/0!	#DIV/0!	#DIV/0!	#DIV/0!	#DIV/0!	#DIV/0!	#DIV/0!	#DIV/0!	#DIV/0!	#DIV/0!	#DIV/0!	#DIV/0!
[truncated: 3 more columns]

## Sheet: ANOSIM
	OPTINALYSIS: SEQUENCE ANALYSIS THROUGH A LOOKING-GLASS
	CN = Central node; Kc = Kabirian coefficient of similarity; PSim. = Probability level of similarity; PDsim. = Probability level of dissimilarity																NUM. = Numeration; DEN. = Denumeration
				For Kc >1 and -ves		For Kc <1
	RESULTS	CN	Kc	Psim,	Pdsim.	Psim,	Pdsim.										NUM	DEN		NUM	DEN
	GI: ANOSIM	6	0.99834	1.00667	-0.00667451	0.99337	0.00663026										1.00166	0.995019		-0.995019	-1.00166
	GII: ANOSIM	6	0.995689	1.01747	-0.0174712	0.982829	0.0171712										1.00431	0.987066		-0.987066	-1.00431
	GIII: ANOSIM	6	0.984941	1.06308	-0.0630843	0.940659	0.0593408										1.01506	0.954824		-0.954824	-1.01506
	GIV: ANOSIM	6	0.986347	1.05694	-0.0569431	0.946125	0.0538753										1.01365	0.959042		-0.959042	-1.01365
	GV: ANOSIM	6	0.942348	1.27884	-0.278837	0.781961	0.218039										1.05765	0.827043		-0.827043	-1.05765
	GVI: ANOSIM	6	0.997926	1.00835	-0.00834961	0.99172	0.00828048										1.00207	0.993777		-0.993777	-1.00207
	Seq.	6	#DIV/0!	#DIV/0!	#DIV/0!	#DIV/0!	#DIV/0!										#DIV/0!	#DIV/0!		#DIV/0!	#DIV/0!
	Seq.	6	#DIV/0!	#DIV/0!	#DIV/0!	#DIV/0!	#DIV/0!										#DIV/0!	#DIV/0!		#DIV/0!	#DIV/0!
	Seq.	6	#DIV/0!	#DIV/0!	#DIV/0!	#DIV/0!	#DIV/0!										#DIV/0!	#DIV/0!		#DIV/0!	#DIV/0!
	Seq.	6	#DIV/0!	#DIV/0!	#DIV/0!	#DIV/0!	#DIV/0!										#DIV/0!	#DIV/0!		#DIV/0!	#DIV/0!
	Seq.	6	#DIV/0!	#DIV/0!	#DIV/0!	#DIV/0!	#DIV/0!										#DIV/0!	#DIV/0!		#DIV/0!	#DIV/0!
	Seq.	6	#DIV/0!	#DIV/0!	#DIV/0!	#DIV/0!	#DIV/0!										#DIV/0!	#DIV/0!		#DIV/0!	#DIV/0!
	Seq.	6	#DIV/0!	#DIV/0!	#DIV/0!	#DIV/0!	#DIV/0!										#DIV/0!	#DIV/0!		#DIV/0!	#DIV/0!
	Seq.	6	#DIV/0!	#DIV/0!	#DIV/0!	#DIV/0!	#DIV/0!										#DIV/0!	#DIV/0!		#DIV/0!	#DIV/0!
	Seq.	6	#DIV/0!	#DIV/0!	#DIV/0!	#DIV/0!	#DIV/0!										#DIV/0!	#DIV/0!		#DIV/0!	#DIV/0!
	Seq.	6	#DIV/0!	#DIV/0!	#DIV/0!	#DIV/0!	#DIV/0!										#DIV/0!	#DIV/0!		#DIV/0!	#DIV/0!
	Seq.	6	#DIV/0!	#DIV/0!	#DIV/0!	#DIV/0!	#DIV/0!										#DIV/0!	#DIV/0!		#DIV/0!	#DIV/0!
	Seq.	6	#DIV/0!	#DIV/0!	#DIV/0!	#DIV/0!	#DIV/0!										#DIV/0!	#DIV/0!		#DIV/0!	#DIV/0!
	Seq.	6	#DIV/0!	#DIV/0!	#DIV/0!	#DIV/0!	#DIV/0!										#DIV/0!	#DIV/0!		#DIV/0!	#DIV/0!
	Seq.	6	#DIV/0!	#DIV/0!	#DIV/0!	#DIV/0!	#DIV/0!										#DIV/0!	#DIV/0!		#DIV/0!	#DIV/0!
	SEQUENCES	INPUT SEQUENCE																												SEQUENCES	COMPUTATION AND CALCULATIONS
	QUANTITATIVE SCALE	GI: ANOSIM	GII: ANOSIM	GIII: ANOSIM	GIV: ANOSIM	GV: ANOSIM	GVI: ANOSIM	Seq.	Seq.	Seq.	Seq.	Seq.	Seq.	Seq.	Seq.	Seq.	Seq.	Seq.	Seq.	Seq.	Seq.									QUANTITATIVE SCALE	GI: ANOSIM	GII: ANOSIM	GIII: ANOSIM	GIV: ANOSIM	GV: ANOSIM	GVI: ANOSIM	Seq.	Seq.	Seq.	Seq.	Seq.	Seq.	Seq.	Seq.	Seq.	Seq.	Seq.	Seq.	Seq.
	1	0.9157	0.8885	0.5082	0.5442	0.0724	0.842	0	0	0	0	0	0	0	0	0	0	0	0	0	0									1	0.9157	0.8885	0.5082	0.5442	0.0724	0.842	0	0	0	0	0	0	0	0	0	0	0	0	0
	2	0.9336	0.9474	0.611	0.5975	0.2679	0.8544	0	0	0	0	0	0	0	0	0	0	0	0	0	0									2	1.8672	1.8948	1.222	1.195	0.5358	1.7088	0	0	0	0	0	0	0	0	0	0	0	0	0
	3	0.9362	0.9695	0.6322	0.6112	0.5157	0.8575	0	0	0	0	0	0	0	0	0	0	0	0	0	0									3	2.8086	2.9085	1.8966	1.8336	1.5471	2.5725	0	0	0	0	0	0	0	0	0	0	0	0	0
	4	0.9502	0.9893	0.7129	0.6346	0.5833	0.881	0	0	0	0	0	0	0	0	0	0	0	0	0	0									4	3.8008	3.9572	2.8516	2.5384	2.3332	3.524	0	0	0	0	0	0	0	0	0	0	0	0	0
	5	0.9545	0.9916	0.752	0.7895	0.7004	0.8827	0	0	0	0	0	0	0	0	0	0	0	0	0	0									5	4.7725	4.958	3.76	3.9475	3.502	4.4135	0	0	0	0	0	0	0	0	0	0	0	0	0
	6	0	0	0	0	0	0	0	0	0	0	0	0	0	0	0	0	0	0	0	0									6	0	0	0	0	0	0	0	0	0	0	0	0	0	0	0	0	0	0	0
	7	0.938	0.9573	0.6433	0.6354	0.4279	0.8635	0	0	0	0	0	0	0	0	0	0	0	0	0	0									7	6.566	6.7011	4.5031	4.4478	2.9953	6.0445	0	0	0	0	0	0	0	0	0	0	0	0	0
	8	0.938	0.9573	0.6433	0.6354	0.4279	0.8635	0	0	0	0	0	0	0	0	0	0	0	0	0	0									8	7.504	7.6584	5.1464	5.0832	3.4232	6.908	0	0	0	0	0	0	0	0	0	0	0	0	0
	9	0.938	0.9573	0.6433	0.6354	0.4279	0.8635	0	0	0	0	0	0	0	0	0	0	0	0	0	0									9	8.442	8.6157	5.7897	5.7186	3.8511	7.7715	0	0	0	0	0	0	0	0	0	0	0	0	0
	10	0.938	0.9573	0.6433	0.6354	0.4279	0.8635	0	0	0	0	0	0	0	0	0	0	0	0	0	0									10	9.38	9.573	6.433	6.354	4.279	8.635	0	0	0	0	0	0	0	0	0	0	0	0	0
	11	0.938	0.9573	0.6433	0.6354	0.4279	0.8635	0	0	0	0	0	0	0	0	0	0	0	0	0	0									11	10.318	10.5303	7.0763	6.9894	4.7069	9.4985	0	0	0	0	0	0	0	0	0	0	0	0	0
	12	0	0	0	0	0	0	0	0	0	0	0	0	0	0	0	0	0	0	0	0									12	0	0	0	0	0	0	0	0	0	0	0	0	0	0	0	0	0	0	0
	13	0	0	0	0	0	0	0	0	0	0	0	0	0	0	0	0	0	0	0	0									13	0	0	0	0	0	0	0	0	0	0	0	0	0	0	0	0	0	0	0
	14	0	0	0	0	0	0	0	0	0	0	0	0	0	0	0	0	0	0	0	0									14	0	0	0	0	0	0	0	0	0	0	0	0	0	0	0	0	0	0	0
	15	0	0	0	0	0	0	0	0	0	0	0	0	0	0	0	0	0	0	0	0									15	0	0	0	0	0	0	0	0	0	0	0	0	0	0	0	0	0	0	0
	16	0	0	0	0	0	0	0	0	0	0	0	0	0	0	0	0	0	0	0	0									16	0	0	0	0	0	0	0	0	0	0	0	0	0	0	0	0	0	0	0
	17	0	0	0	0	0	0	0	0	0	0	0	0	0	0	0	0	0	0	0	0									17	0	0	0	0	0	0	0	0	0	0	0	0	0	0	0	0	0	0	0
	18	0	0	0	0	0	0	0	0	0	0	0	0	0	0	0	0	0	0	0	0									18	0	0	0	0	0	0	0	0	0	0	0	0	0	0	0	0	0	0	0
	19	0	0	0	0	0	0	0	0	0	0	0	0	0	0	0	0	0	0	0	0									19	0	0	0	0	0	0	0	0	0	0	0	0	0	0	0	0	0	0	0
	20	0	0	0	0	0	0	0	0	0	0	0	0	0	0	0	0	0	0	0	0									20	0	0	0	0	0	0	0	0	0	0	0	0	0	0	0	0	0	0	0
	21	0	0	0	0	0	0	0	0	0	0	0	0	0	0	0	0	0	0	0	0									21	0	0	0	0	0	0	0	0	0	0	0	0	0	0	0	0	0	0	0
	22	0	0	0	0	0	0	0	0	0	0	0	0	0	0	0	0	0	0	0	0									22	0	0	0	0	0	0	0	0	0	0	0	0	0	0	0	0	0	0	0
	23	0	0	0	0	0	0	0	0	0	0	0	0	0	0	0	0	0	0	0	0									23	0	0	0	0	0	0	0	0	0	0	0	0	0	0	0	0	0	0	0
	24	0	0	0	0	0	0	0	0	0	0	0	0	0	0	0	0	0	0	0	0									24	0	0	0	0	0	0	0	0	0	0	0	0	0	0	0	0	0	0	0
	25	0	0	0	0	0	0	0	0	0	0	0	0	0	0	0	0	0	0	0	0									25	0	0	0	0	0	0	0	0	0	0	0	0	0	0	0	0	0	0	0
	26	0	0	0	0	0	0	0	0	0	0	0	0	0	0	0	0	0	0	0	0									26	0	0	0	0	0	0	0	0	0	0	0	0	0	0	0	0	0	0	0
	27	0	0	0	0	0	0	0	0	0	0	0	0	0	0	0	0	0	0	0	0									27	0	0	0	0	0	0	0	0	0	0	0	0	0	0	0	0	0	0	0
	28	0	0	0	0	0	0	0	0	0	0	0	0	0	0	0	0	0	0	0	0									28	0	0	0	0	0	0	0	0	0	0	0	0	0	0	0	0	0	0	0
	29	0	0	0	0	0	0	0	0	0	0	0	0	0	0	0	0	0	0	0	0									29	0	0	0	0	0	0	0	0	0	0	0	0	0	0	0	0	0	0	0
	30	0	0	0	0	0	0	0	0	0	0	0	0	0	0	0	0	0	0	0	0									30	0	0	0	0	0	0	0	0	0	0	0	0	0	0	0	0	0	0	0
	31	0	0	0	0	0	0	0	0	0	0	0	0	0	0	0	0	0	0	0	0									31	0	0	0	0	0	0	0	0	0	0	0	0	0	0	0	0	0	0	0
	32	0	0	0	0	0	0	0	0	0	0	0	0	0	0	0	0	0	0	0	0									32	0	0	0	0	0	0	0	0	0	0	0	0	0	0	0	0	0	0	0
	33	0	0	0	0	0	0	0	0	0	0	0	0	0	0	0	0	0	0	0	0									33	0	0	0	0	0	0	0	0	0	0	0	0	0	0	0	0	0	0	0
	34	0	0	0	0	0	0	0	0	0	0	0	0	0	0	0	0	0	0	0	0									34	0	0	0	0	0	0	0	0	0	0	0	0	0	0	0	0	0	0	0
	35	0	0	0	0	0	0	0	0	0	0	0	0	0	0	0	0	0	0	0	0									35	0	0	0	0	0	0	0	0	0	0	0	0	0	0	0	0	0	0	0
	36	0	0	0	0	0	0	0	0	0	0	0	0	0	0	0	0	0	0	0	0									36	0	0	0	0	0	0	0	0	0	0	0	0	0	0	0	0	0	0	0
	37	0	0	0	0	0	0	0	0	0	0	0	0	0	0	0	0	0	0	0	0									37	0	0	0	0	0	0	0	0	0	0	0	0	0	0	0	0	0	0	0
	38	0	0	0	0	0	0	0	0	0	0	0	0	0	0	0	0	0	0	0	0									38	0	0	0	0	0	0	0	0	0	0	0	0	0	0	0	0	0	0	0
	39	0	0	0	0	0	0	0	0	0	0	0	0	0	0	0	0	0	0	0	0									39	0	0	0	0	0	0	0	0	0	0	0	0	0	0	0	0	0	0	0
	40	0	0	0	0	0	0	0	0	0	0	0	0	0	0	0	0	0	0	0	0									40	0	0	0	0	0	0	0	0	0	0	0	0	0	0	0	0	0	0	0
	41	0	0	0	0	0	0	0	0	0	0	0	0	0	0	0	0	0	0	0	0									41	0	0	0	0	0	0	0	0	0	0	0	0	0	0	0	0	0	0	0
	42	0	0	0	0	0	0	0	0	0	0	0	0	0	0	0	0	0	0	0	0									42	0	0	0	0	0	0	0	0	0	0	0	0	0	0	0	0	0	0	0
	43	0	0	0	0	0	0	0	0	0	0	0	0	0	0	0	0	0	0	0	0									43	0	0	0	0	0	0	0	0	0	0	0	0	0	0	0	0	0	0	0
	44	0	0	0	0	0	0	0	0	0	0	0	0	0	0	0	0	0	0	0	0									44	0	0	0	0	0	0	0	0	0	0	0	0	0	0	0	0	0	0	0
	45	0	0	0	0	0	0	0	0	0	0	0	0	0	0	0	0	0	0	0	0									45	0	0	0	0	0	0	0	0	0	0	0	0	0	0	0	0	0	0	0
	46	0	0	0	0	0	0	0	0	0	0	0	0	0	0	0	0	0	0	0	0									46	0	0	0	0	0	0	0	0	0	0	0	0	0	0	0	0	0	0	0
	47	0	0	0	0	0	0	0	0	0	0	0	0	0	0	0	0	0	0	0	0									47	0	0	0	0	0	0	0	0	0	0	0	0	0	0	0	0	0	0	0
	48	0	0	0	0	0	0	0	0	0	0	0	0	0	0	0	0	0	0	0	0									48	0	0	0	0	0	0	0	0	0	0	0	0	0	0	0	0	0	0	0
	49	0	0	0	0	0	0	0	0	0	0	0	0	0	0	0	0	0	0	0	0									49	0	0	0	0	0	0	0	0	0	0	0	0	0	0	0	0	0	0	0
	50	0	0	0	0	0	0	0	0	0	0	0	0	0	0	0	0	0	0	0	0									50	0	0	0	0	0	0	0	0	0	0	0	0	0	0	0	0	0	0	0
	51	0	0	0	0	0	0	0	0	0	0	0	0	0	0	0	0	0	0	0	0									51	0	0	0	0	0	0	0	0	0	0	0	0	0	0	0	0	0	0	0
	52	0	0	0	0	0	0	0	0	0	0	0	0	0	0	0	0	0	0	0	0									52	0	0	0	0	0	0	0	0	0	0	0	0	0	0	0	0	0	0	0
	53	0	0	0	0	0	0	0	0	0	0	0	0	0	0	0	0	0	0	0	0									53	0	0	0	0	0	0	0	0	0	0	0	0	0	0	0	0	0	0	0
	54	0	0	0	0	0	0	0	0	0	0	0	0	0	0	0	0	0	0	0	0									54	0	0	0	0	0	0	0	0	0	0	0	0	0	0	0	0	0	0	0
	55	0	0	0	0	0	0	0	0	0	0	0	0	0	0	0	0	0	0	0	0									55	0	0	0	0	0	0	0	0	0	0	0	0	0	0	0	0	0	0	0
	56	0	0	0	0	0	0	0	0	0	0	0	0	0	0	0	0	0	0	0	0									56	0	0	0	0	0	0	0	0	0	0	0	0	0	0	0	0	0	0	0
	57	0	0	0	0	0	0	0	0	0	0	0	0	0	0	0	0	0	0	0	0									57	0	0	0	0	0	0	0	0	0	0	0	0	0	0	0	0	0	0	0
	58	0	0	0	0	0	0	0	0	0	0	0	0	0	0	0	0	0	0	0	0									58	0	0	0	0	0	0	0	0	0	0	0	0	0	0	0	0	0	0	0
	59	0	0	0	0	0	0	0	0	0	0	0	0	0	0	0	0	0	0	0	0									59	0	0	0	0	0	0	0	0	0	0	0	0	0	0	0	0	0	0	0
	60	0	0	0	0	0	0	0	0	0	0	0	0	0	0	0	0	0	0	0	0									60	0	0	0	0	0	0	0	0	0	0	0	0	0	0	0	0	0	0	0
	61	0	0	0	0	0	0	0	0	0	0	0	0	0	0	0	0	0	0	0	0									61	0	0	0	0	0	0	0	0	0	0	0	0	0	0	0	0	0	0	0
	62	0	0	0	0	0	0	0	0	0	0	0	0	0	0	0	0	0	0	0	0									62	0	0	0	0	0	0	0	0	0	0	0	0	0	0	0	0	0	0	0
	63	0	0	0	0	0	0	0	0	0	0	0	0	0	0	0	0	0	0	0	0									63	0	0	0	0	0	0	0	0	0	0	0	0	0	0	0	0	0	0	0
	64	0	0	0	0	0	0	0	0	0	0	0	0	0	0	0	0	0	0	0	0									64	0	0	0	0	0	0	0	0	0	0	0	0	0	0	0	0	0	0	0
	65	0	0	0	0	0	0	0	0	0	0	0	0	0	0	0	0	0	0	0	0									65	0	0	0	0	0	0	0	0	0	0	0	0	0	0	0	0	0	0	0
	66	0	0	0	0	0	0	0	0	0	0	0	0	0	0	0	0	0	0	0	0									66	0	0	0	0	0	0	0	0	0	0	0	0	0	0	0	0	0	0	0
	67	0	0	0	0	0	0	0	0	0	0	0	0	0	0	0	0	0	0	0	0									67	0	0	0	0	0	0	0	0	0	0	0	0	0	0	0	0	0	0	0
	68	0	0	0	0	0	0	0	0	0	0	0	0	0	0	0	0	0	0	0	0									68	0	0	0	0	0	0	0	0	0	0	0	0	0	0	0	0	0	0	0
	69	0	0	0	0	0	0	0	0	0	0	0	0	0	0	0	0	0	0	0	0									69	0	0	0	0	0	0	0	0	0	0	0	0	0	0	0	0	0	0	0
	70	0	0	0	0	0	0	0	0	0	0	0	0	0	0	0	0	0	0	0	0									70	0	0	0	0	0	0	0	0	0	0	0	0	0	0	0	0	0	0	0
	71	0	0	0	0	0	0	0	0	0	0	0	0	0	0	0	0	0	0	0	0									71	0	0	0	0	0	0	0	0	0	0	0	0	0	0	0	0	0	0	0
	72	0	0	0	0	0	0	0	0	0	0	0	0	0	0	0	0	0	0	0	0									72	0	0	0	0	0	0	0	0	0	0	0	0	0	0	0	0	0	0	0
	73	0	0	0	0	0	0	0	0	0	0	0	0	0	0	0	0	0	0	0	0									73	0	0	0	0	0	0	0	0	0	0	0	0	0	0	0	0	0	0	0
	74	0	0	0	0	0	0	0	0	0	0	0	0	0	0	0	0	0	0	0	0									74	0	0	0	0	0	0	0	0	0	0	0	0	0	0	0	0	0	0	0
	75	0	0	0	0	0	0	0	0	0	0	0	0	0	0	0	0	0	0	0	0									75	0	0	0	0	0	0	0	0	0	0	0	0	0	0	0	0	0	0	0
	76	0	0	0	0	0	0	0	0	0	0	0	0	0	0	0	0	0	0	0	0									76	0	0	0	0	0	0	0	0	0	0	0	0	0	0	0	0	0	0	0
	77	0	0	0	0	0	0	0	0	0	0	0	0	0	0	0	0	0	0	0	0									77	0	0	0	0	0	0	0	0	0	0	0	0	0	0	0	0	0	0	0
	78	0	0	0	0	0	0	0	0	0	0	0	0	0	0	0	0	0	0	0	0									78	0	0	0	0	0	0	0	0	0	0	0	0	0	0	0	0	0	0	0
	79	0	0	0	0	0	0	0	0	0	0	0	0	0	0	0	0	0	0	0	0									79	0	0	0	0	0	0	0	0	0	0	0	0	0	0	0	0	0	0	0
	80	0	0	0	0	0	0	0	0	0	0	0	0	0	0	0	0	0	0	0	0									80	0	0	0	0	0	0	0	0	0	0	0	0	0	0	0	0	0	0	0
	81	0	0	0	0	0	0	0	0	0	0	0	0	0	0	0	0	0	0	0	0									81	0	0	0	0	0	0	0	0	0	0	0	0	0	0	0	0	0	0	0
	82	0	0	0	0	0	0	0	0	0	0	0	0	0	0	0	0	0	0	0	0									82	0	0	0	0	0	0	0	0	0	0	0	0	0	0	0	0	0	0	0
	83	0	0	0	0	0	0	0	0	0	0	0	0	0	0	0	0	0	0	0	0									83	0	0	0	0	0	0	0	0	0	0	0	0	0	0	0	0	0	0	0
	84	0	0	0	0	0	0	0	0	0	0	0	0	0	0	0	0	0	0	0	0									84	0	0	0	0	0	0	0	0	0	0	0	0	0	0	0	0	0	0	0
	85	0	0	0	0	0	0	0	0	0	0	0	0	0	0	0	0	0	0	0	0									85	0	0	0	0	0	0	0	0	0	0	0	0	0	0	0	0	0	0	0
	86	0	0	0	0	0	0	0	0	0	0	0	0	0	0	0	0	0	0	0	0									86	0	0	0	0	0	0	0	0	0	0	0	0	0	0	0	0	0	0	0
	87	0	0	0	0	0	0	0	0	0	0	0	0	0	0	0	0	0	0	0	0									87	0	0	0	0	0	0	0	0	0	0	0	0	0	0	0	0	0	0	0
	88	0	0	0	0	0	0	0	0	0	0	0	0	0	0	0	0	0	0	0	0									88	0	0	0	0	0	0	0	0	0	0	0	0	0	0	0	0	0	0	0
	89	0	0	0	0	0	0	0	0	0	0	0	0	0	0	0	0	0	0	0	0									89	0	0	0	0	0	0	0	0	0	0	0	0	0	0	0	0	0	0	0
	90	0	0	0	0	0	0	0	0	0	0	0	0	0	0	0	0	0	0	0	0									90	0	0	0	0	0	0	0	0	0	0	0	0	0	0	0	0	0	0	0
	91	0	0	0	0	0	0	0	0	0	0	0	0	0	0	0	0	0	0	0	0									91	0	0	0	0	0	0	0	0	0	0	0	0	0	0	0	0	0	0	0
	92	0	0	0	0	0	0	0	0	0	0	0	0	0	0	0	0	0	0	0	0									92	0	0	0	0	0	0	0	0	0	0	0	0	0	0	0	0	0	0	0
	93	0	0	0	0	0	0	0	0	0	0	0	0	0	0	0	0	0	0	0	0									93	0	0	0	0	0	0	0	0	0	0	0	0	0	0	0	0	0	0	0
	94	0	0	0	0	0	0	0	0	0	0	0	0	0	0	0	0	0	0	0	0									94	0	0	0	0	0	0	0	0	0	0	0	0	0	0	0	0	0	0	0
	95	0	0	0	0	0	0	0	0	0	0	0	0	0	0	0	0	0	0	0	0									95	0	0	0	0	0	0	0	0	0	0	0	0	0	0	0	0	0	0	0
	96	0	0	0	0	0	0	0	0	0	0	0	0	0	0	0	0	0	0	0	0									96	0	0	0	0	0	0	0	0	0	0	0	0	0	0	0	0	0	0	0
	97	0	0	0	0	0	0	0	0	0	0	0	0	0	0	0	0	0	0	0	0									97	0	0	0	0	0	0	0	0	0	0	0	0	0	0	0	0	0	0	0
	98	0	0	0	0	0	0	0	0	0	0	0	0	0	0	0	0	0	0	0	0									98	0	0	0	0	0	0	0	0	0	0	0	0	0	0	0	0	0	0	0
	99	0	0	0	0	0	0	0	0	0	0	0	0	0	0	0	0	0	0	0	0									99	0	0	0	0	0	0	0	0	0	0	0	0	0	0	0	0	0	0	0
	100	0	0	0	0	0	0	0	0	0	0	0	0	0	0	0	0	0	0	0	0									100	0	0	0	0	0	0	0	0	0	0	0	0	0	0	0	0	0	0	0
	101	0	0	0	0	0	0	0	0	0	0	0	0	0	0	0	0	0	0	0	0									101	0	0	0	0	0	0	0	0	0	0	0	0	0	0	0	0	0	0	0
	102	0	0	0	0	0	0	0	0	0	0	0	0	0	0	0	0	0	0	0	0									102	0	0	0	0	0	0	0	0	0	0	0	0	0	0	0	0	0	0	0
	103	0	0	0	0	0	0	0	0	0	0	0	0	0	0	0	0	0	0	0	0									103	0	0	0	0	0	0	0	0	0	0	0	0	0	0	0	0	0	0	0
	104	0	0	0	0	0	0	0	0	0	0	0	0	0	0	0	0	0	0	0	0									104	0	0	0	0	0	0	0	0	0	0	0	0	0	0	0	0	0	0	0
	105	0	0	0	0	0	0	0	0	0	0	0	0	0	0	0	0	0	0	0	0									105	0	0	0	0	0	0	0	0	0	0	0	0	0	0	0	0	0	0	0
	106	0	0	0	0	0	0	0	0	0	0	0	0	0	0	0	0	0	0	0	0									106	0	0	0	0	0	0	0	0	0	0	0	0	0	0	0	0	0	0	0
	107	0	0	0	0	0	0	0	0	0	0	0	0	0	0	0	0	0	0	0	0									107	0	0	0	0	0	0	0	0	0	0	0	0	0	0	0	0	0	0	0
	108	0	0	0	0	0	0	0	0	0	0	0	0	0	0	0	0	0	0	0	0									108	0	0	0	0	0	0	0	0	0	0	0	0	0	0	0	0	0	0	0
	109	0	0	0	0	0	0	0	0	0	0	0	0	0	0	0	0	0	0	0	0									109	0	0	0	0	0	0	0	0	0	0	0	0	0	0	0	0	0	0	0
	110	0	0	0	0	0	0	0	0	0	0	0	0	0	0	0	0	0	0	0	0									110	0	0	0	0	0	0	0	0	0	0	0	0	0	0	0	0	0	0	0
	111	0	0	0	0	0	0	0	0	0	0	0	0	0	0	0	0	0	0	0	0									111	0	0	0	0	0	0	0	0	0	0	0	0	0	0	0	0	0	0	0
	112	0	0	0	0	0	0	0	0	0	0	0	0	0	0	0	0	0	0	0	0									112	0	0	0	0	0	0	0	0	0	0	0	0	0	0	0	0	0	0	0
	113	0	0	0	0	0	0	0	0	0	0	0	0	0	0	0	0	0	0	0	0									113	0	0	0	0	0	0	0	0	0	0	0	0	0	0	0	0	0	0	0
	114	0	0	0	0	0	0	0	0	0	0	0	0	0	0	0	0	0	0	0	0									114	0	0	0	0	0	0	0	0	0	0	0	0	0	0	0	0	0	0	0
	115	0	0	0	0	0	0	0	0	0	0	0	0	0	0	0	0	0	0	0	0									115	0	0	0	0	0	0	0	0	0	0	0	0	0	0	0	0	0	0	0
	116	0	0	0	0	0	0	0	0	0	0	0	0	0	0	0	0	0	0	0	0									116	0	0	0	0	0	0	0	0	0	0	0	0	0	0	0	0	0	0	0
	117	0	0	0	0	0	0	0	0	0	0	0	0	0	0	0	0	0	0	0	0									117	0	0	0	0	0	0	0	0	0	0	0	0	0	0	0	0	0	0	0
	118	0	0	0	0	0	0	0	0	0	0	0	0	0	0	0	0	0	0	0	0									118	0	0	0	0	0	0	0	0	0	0	0	0	0	0	0	0	0	0	0
	119	0	0	0	0	0	0	0	0	0	0	0	0	0	0	0	0	0	0	0	0									119	0	0	0	0	0	0	0	0	0	0	0	0	0	0	0	0	0	0	0
	120	0	0	0	0	0	0	0	0	0	0	0	0	0	0	0	0	0	0	0	0									120	0	0	0	0	0	0	0	0	0	0	0	0	0	0	0	0	0	0	0
	121	0	0	0	0	0	0	0	0	0	0	0	0	0	0	0	0	0	0	0	0									121	0	0	0	0	0	0	0	0	0	0	0	0	0	0	0	0	0	0	0
	122	0	0	0	0	0	0	0	0	0	0	0	0	0	0	0	0	0	0	0	0									122	0	0	0	0	0	0	0	0	0	0	0	0	0	0	0	0	0	0	0
	123	0	0	0	0	0	0	0	0	0	0	0	0	0	0	0	0	0	0	0	0									123	0	0	0	0	0	0	0	0	0	0	0	0	0	0	0	0	0	0	0
	124	0	0	0	0	0	0	0	0	0	0	0	0	0	0	0	0	0	0	0	0									124	0	0	0	0	0	0	0	0	0	0	0	0	0	0	0	0	0	0	0
	125	0	0	0	0	0	0	0	0	0	0	0	0	0	0	0	0	0	0	0	0									125	0	0	0	0	0	0	0	0	0	0	0	0	0	0	0	0	0	0	0
	126	0	0	0	0	0	0	0	0	0	0	0	0	0	0	0	0	0	0	0	0									126	0	0	0	0	0	0	0	0	0	0	0	0	0	0	0	0	0	0	0
	127	0	0	0	0	0	0	0	0	0	0	0	0	0	0	0	0	0	0	0	0									127	0	0	0	0	0	0	0	0	0	0	0	0	0	0	0	0	0	0	0
	128	0	0	0	0	0	0	0	0	0	0	0	0	0	0	0	0	0	0	0	0									128	0	0	0	0	0	0	0	0	0	0	0	0	0	0	0	0	0	0	0
	129	0	0	0	0	0	0	0	0	0	0	0	0	0	0	0	0	0	0	0	0									129	0	0	0	0	0	0	0	0	0	0	0	0	0	0	0	0	0	0	0
	130	0	0	0	0	0	0	0	0	0	0	0	0	0	0	0	0	0	0	0	0									130	0	0	0	0	0	0	0	0	0	0	0	0	0	0	0	0	0	0	0
	131	0	0	0	0	0	0	0	0	0	0	0	0	0	0	0	0	0	0	0	0									131	0	0	0	0	0	0	0	0	0	0	0	0	0	0	0	0	0	0	0
	132	0	0	0	0	0	0	0	0	0	0	0	0	0	0	0	0	0	0	0	0									132	0	0	0	0	0	0	0	0	0	0	0	0	0	0	0	0	0	0	0
	133	0	0	0	0	0	0	0	0	0	0	0	0	0	0	0	0	0	0	0	0									133	0	0	0	0	0	0	0	0	0	0	0	0	0	0	0	0	0	0	0
	134	0	0	0	0	0	0	0	0	0	0	0	0	0	0	0	0	0	0	0	0									134	0	0	0	0	0	0	0	0	0	0	0	0	0	0	0	0	0	0	0
	135	0	0	0	0	0	0	0	0	0	0	0	0	0	0	0	0	0	0	0	0									135	0	0	0	0	0	0	0	0	0	0	0	0	0	0	0	0	0	0	0
	136	0	0	0	0	0	0	0	0	0	0	0	0	0	0	0	0	0	0	0	0									136	0	0	0	0	0	0	0	0	0	0	0	0	0	0	0	0	0	0	0
	137	0	0	0	0	0	0	0	0	0	0	0	0	0	0	0	0	0	0	0	0									137	0	0	0	0	0	0	0	0	0	0	0	0	0	0	0	0	0	0	0
	138	0	0	0	0	0	0	0	0	0	0	0	0	0	0	0	0	0	0	0	0									138	0	0	0	0	0	0	0	0	0	0	0	0	0	0	0	0	0	0	0
	139	0	0	0	0	0	0	0	0	0	0	0	0	0	0	0	0	0	0	0	0									139	0	0	0	0	0	0	0	0	0	0	0	0	0	0	0	0	0	0	0
	140	0	0	0	0	0	0	0	0	0	0	0	0	0	0	0	0	0	0	0	0									140	0	0	0	0	0	0	0	0	0	0	0	0	0	0	0	0	0	0	0
	141	0	0	0	0	0	0	0	0	0	0	0	0	0	0	0	0	0	0	0	0									141	0	0	0	0	0	0	0	0	0	0	0	0	0	0	0	0	0	0	0
	142	0	0	0	0	0	0	0	0	0	0	0	0	0	0	0	0	0	0	0	0									142	0	0	0	0	0	0	0	0	0	0	0	0	0	0	0	0	0	0	0
	143	0	0	0	0	0	0	0	0	0	0	0	0	0	0	0	0	0	0	0	0									143	0	0	0	0	0	0	0	0	0	0	0	0	0	0	0	0	0	0	0
	144	0	0	0	0	0	0	0	0	0	0	0	0	0	0	0	0	0	0	0	0									144	0	0	0	0	0	0	0	0	0	0	0	0	0	0	0	0	0	0	0
	145	0	0	0	0	0	0	0	0	0	0	0	0	0	0	0	0	0	0	0	0									145	0	0	0	0	0	0	0	0	0	0	0	0	0	0	0	0	0	0	0
	146	0	0	0	0	0	0	0	0	0	0	0	0	0	0	0	0	0	0	0	0									146	0	0	0	0	0	0	0	0	0	0	0	0	0	0	0	0	0	0	0
	147	0	0	0	0	0	0	0	0	0	0	0	0	0	0	0	0	0	0	0	0									147	0	0	0	0	0	0	0	0	0	0	0	0	0	0	0	0	0	0	0
	148	0	0	0	0	0	0	0	0	0	0	0	0	0	0	0	0	0	0	0	0									148	0	0	0	0	0	0	0	0	0	0	0	0	0	0	0	0	0	0	0
	149	0	0	0	0	0	0	0	0	0	0	0	0	0	0	0	0	0	0	0	0									149	0	0	0	0	0	0	0	0	0	0	0	0	0	0	0	0	0	0	0
	150	0	0	0	0	0	0	0	0	0	0	0	0	0	0	0	0	0	0	0	0									150	0	0	0	0	0	0	0	0	0	0	0	0	0	0	0	0	0	0	0
	151	0	0	0	0	0	0	0	0	0	0	0	0	0	0	0	0	0	0	0	0									151	0	0	0	0	0	0	0	0	0	0	0	0	0	0	0	0	0	0	0
	152	0	0	0	0	0	0	0	0	0	0	0	0	0	0	0	0	0	0	0	0									152	0	0	0	0	0	0	0	0	0	0	0	0	0	0	0	0	0	0	0
	153	0	0	0	0	0	0	0	0	0	0	0	0	0	0	0	0	0	0	0	0									153	0	0	0	0	0	0	0	0	0	0	0	0	0	0	0	0	0	0	0
	154	0	0	0	0	0	0	0	0	0	0	0	0	0	0	0	0	0	0	0	0									154	0	0	0	0	0	0	0	0	0	0	0	0	0	0	0	0	0	0	0
	155	0	0	0	0	0	0	0	0	0	0	0	0	0	0	0	0	0	0	0	0									155	0	0	0	0	0	0	0	0	0	0	0	0	0	0	0	0	0	0	0
	156	0	0	0	0	0	0	0	0	0	0	0	0	0	0	0	0	0	0	0	0									156	0	0	0	0	0	0	0	0	0	0	0	0	0	0	0	0	0	0	0
	157	0	0	0	0	0	0	0	0	0	0	0	0	0	0	0	0	0	0	0	0									157	0	0	0	0	0	0	0	0	0	0	0	0	0	0	0	0	0	0	0
	158	0	0	0	0	0	0	0	0	0	0	0	0	0	0	0	0	0	0	0	0									158	0	0	0	0	0	0	0	0	0	0	0	0	0	0	0	0	0	0	0
	159	0	0	0	0	0	0	0	0	0	0	0	0	0	0	0	0	0	0	0	0									159	0	0	0	0	0	0	0	0	0	0	0	0	0	0	0	0	0	0	0
	160	0	0	0	0	0	0	0	0	0	0	0	0	0	0	0	0	0	0	0	0									160	0	0	0	0	0	0	0	0	0	0	0	0	0	0	0	0	0	0	0
	161	0	0	0	0	0	0	0	0	0	0	0	0	0	0	0	0	0	0	0	0									161	0	0	0	0	0	0	0	0	0	0	0	0	0	0	0	0	0	0	0
	162	0	0	0	0	0	0	0	0	0	0	0	0	0	0	0	0	0	0	0	0									162	0	0	0	0	0	0	0	0	0	0	0	0	0	0	0	0	0	0	0
	163	0	0	0	0	0	0	0	0	0	0	0	0	0	0	0	0	0	0	0	0									163	0	0	0	0	0	0	0	0	0	0	0	0	0	0	0	0	0	0	0
	164	0	0	0	0	0	0	0	0	0	0	0	0	0	0	0	0	0	0	0	0									164	0	0	0	0	0	0	0	0	0	0	0	0	0	0	0	0	0	0	0
	165	0	0	0	0	0	0	0	0	0	0	0	0	0	0	0	0	0	0	0	0									165	0	0	0	0	0	0	0	0	0	0	0	0	0	0	0	0	0	0	0
	166	0	0	0	0	0	0	0	0	0	0	0	0	0	0	0	0	0	0	0	0									166	0	0	0	0	0	0	0	0	0	0	0	0	0	0	0	0	0	0	0
	167	0	0	0	0	0	0	0	0	0	0	0	0	0	0	0	0	0	0	0	0									167	0	0	0	0	0	0	0	0	0	0	0	0	0	0	0	0	0	0	0
	168	0	0	0	0	0	0	0	0	0	0	0	0	0	0	0	0	0	0	0	0									168	0	0	0	0	0	0	0	0	0	0	0	0	0	0	0	0	0	0	0
	169	0	0	0	0	0	0	0	0	0	0	0	0	0	0	0	0	0	0	0	0									169	0	0	0	0	0	0	0	0	0	0	0	0	0	0	0	0	0	0	0
	170	0	0	0	0	0	0	0	0	0	0	0	0	0	0	0	0	0	0	0	0									170	0	0	0	0	0	0	0	0	0	0	0	0	0	0	0	0	0	0	0
	171	0	0	0	0	0	0	0	0	0	0	0	0	0	0	0	0	0	0	0	0									171	0	0	0	0	0	0	0	0	0	0	0	0	0	0	0	0	0	0	0
	172	0	0	0	0	0	0	0	0	0	0	0	0	0	0	0	0	0	0	0	0									172	0	0	0	0	0	0	0	0	0	0	0	0	0	0	0	0	0	0	0
	173	0	0	0	0	0	0	0	0	0	0	0	0	0	0	0	0	0	0	0	0									173	0	0	0	0	0	0	0	0	0	0	0	0	0	0	0	0	0	0	0
	174	0	0	0	0	0	0	0	0	0	0	0	0	0	0	0	0	0	0	0	0									174	0	0	0	0	0	0	0	0	0	0	0	0	0	0	0	0	0	0	0
	175	0	0	0	0	0	0	0	0	0	0	0	0	0	0	0	0	0	0	0	0									175	0	0	0	0	0	0	0	0	0	0	0	0	0	0	0	0	0	0	0
	176	0	0	0	0	0	0	0	0	0	0	0	0	0	0	0	0	0	0	0	0									176	0	0	0	0	0	0	0	0	0	0	0	0	0	0	0	0	0	0	0
	177	0	0	0	0	0	0	0	0	0	0	0	0	0	0	0	0	0	0	0	0									177	0	0	0	0	0	0	0	0	0	0	0	0	0	0	0	0	0	0	0
	178	0	0	0	0	0	0	0	0	0	0	0	0	0	0	0	0	0	0	0	0									178	0	0	0	0	0	0	0	0	0	0	0	0	0	0	0	0	0	0	0
	179	0	0	0	0	0	0	0	0	0	0	0	0	0	0	0	0	0	0	0	0									179	0	0	0	0	0	0	0	0	0	0	0	0	0	0	0	0	0	0	0
	180	0	0	0	0	0	0	0	0	0	0	0	0	0	0	0	0	0	0	0	0									180	0	0	0	0	0	0	0	0	0	0	0	0	0	0	0	0	0	0	0
	181	0	0	0	0	0	0	0	0	0	0	0	0	0	0	0	0	0	0	0	0									181	0	0	0	0	0	0	0	0	0	0	0	0	0	0	0	0	0	0	0
	182	0	0	0	0	0	0	0	0	0	0	0	0	0	0	0	0	0	0	0	0									182	0	0	0	0	0	0	0	0	0	0	0	0	0	0	0	0	0	0	0
	183	0	0	0	0	0	0	0	0	0	0	0	0	0	0	0	0	0	0	0	0									183	0	0	0	0	0	0	0	0	0	0	0	0	0	0	0	0	0	0	0
	184	0	0	0	0	0	0	0	0	0	0	0	0	0	0	0	0	0	0	0	0									184	0	0	0	0	0	0	0	0	0	0	0	0	0	0	0	0	0	0	0
	185	0	0	0	0	0	0	0	0	0	0	0	0	0	0	0	0	0	0	0	0									185	0	0	0	0	0	0	0	0	0	0	0	0	0	0	0	0	0	0	0
	186	0	0	0	0	0	0	0	0	0	0	0	0	0	0	0	0	0	0	0	0									186	0	0	0	0	0	0	0	0	0	0	0	0	0	0	0	0	0	0	0
	187	0	0	0	0	0	0	0	0	0	0	0	0	0	0	0	0	0	0	0	0									187	0	0	0	0	0	0	0	0	0	0	0	0	0	0	0	0	0	0	0
	188	0	0	0	0	0	0	0	0	0	0	0	0	0	0	0	0	0	0	0	0									188	0	0	0	0	0	0	0	0	0	0	0	0	0	0	0	0	0	0	0
	189	0	0	0	0	0	0	0	0	0	0	0	0	0	0	0	0	0	0	0	0									189	0	0	0	0	0	0	0	0	0	0	0	0	0	0	0	0	0	0	0
	190	0	0	0	0	0	0	0	0	0	0	0	0	0	0	0	0	0	0	0	0									190	0	0	0	0	0	0	0	0	0	0	0	0	0	0	0	0	0	0	0
	191	0	0	0	0	0	0	0	0	0	0	0	0	0	0	0	0	0	0	0	0									191	0	0	0	0	0	0	0	0	0	0	0	0	0	0	0	0	0	0	0
	192	0	0	0	0	0	0	0	0	0	0	0	0	0	0	0	0	0	0	0	0									192	0	0	0	0	0	0	0	0	0	0	0	0	0	0	0	0	0	0	0
	193	0	0	0	0	0	0	0	0	0	0	0	0	0	0	0	0	0	0	0	0									193	0	0	0	0	0	0	0	0	0	0	0	0	0	0	0	0	0	0	0
	194	0	0	0	0	0	0	0	0	0	0	0	0	0	0	0	0	0	0	0	0									194	0	0	0	0	0	0	0	0	0	0	0	0	0	0	0	0	0	0	0
	195	0	0	0	0	0	0	0	0	0	0	0	0	0	0	0	0	0	0	0	0									195	0	0	0	0	0	0	0	0	0	0	0	0	0	0	0	0	0	0	0
	196	0	0	0	0	0	0	0	0	0	0	0	0	0	0	0	0	0	0	0	0									196	0	0	0	0	0	0	0	0	0	0	0	0	0	0	0	0	0	0	0
	197	0	0	0	0	0	0	0	0	0	0	0	0	0	0	0	0	0	0	0	0									197	0	0	0	0	0	0	0	0	0	0	0	0	0	0	0	0	0	0	0
	198	0	0	0	0	0	0	0	0	0	0	0	0	0	0	0	0	0	0	0	0									198	0	0	0	0	0	0	0	0	0	0	0	0	0	0	0	0	0	0	0
	199	0	0	0	0	0	0	0	0	0	0	0	0	0	0	0	0	0	0	0	0									199	0	0	0	0	0	0	0	0	0	0	0	0	0	0	0	0	0	0	0
	200	0	0	0	0	0	0	0	0	0	0	0	0	0	0	0	0	0	0	0	0									200	0	0	0	0	0	0	0	0	0	0	0	0	0	0	0	0	0	0	0
	201	0	0	0	0	0	0	0	0	0	0	0	0	0	0	0	0	0	0	0	0									201	0	0	0	0	0	0	0	0	0	0	0	0	0	0	0	0	0	0	0
	202	0	0	0	0	0	0	0	0	0	0	0	0	0	0	0	0	0	0	0	0									202	0	0	0	0	0	0	0	0	0	0	0	0	0	0	0	0	0	0	0
	203	0	0	0	0	0	0	0	0	0	0	0	0	0	0	0	0	0	0	0	0									203	0	0	0	0	0	0	0	0	0	0	0	0	0	0	0	0	0	0	0
	204	0	0	0	0	0	0	0	0	0	0	0	0	0	0	0	0	0	0	0	0									204	0	0	0	0	0	0	0	0	0	0	0	0	0	0	0	0	0	0	0
	205	0	0	0	0	0	0	0	0	0	0	0	0	0	0	0	0	0	0	0	0									205	0	0	0	0	0	0	0	0	0	0	0	0	0	0	0	0	0	0	0
	206	0	0	0	0	0	0	0	0	0	0	0	0	0	0	0	0	0	0	0	0									206	0	0	0	0	0	0	0	0	0	0	0	0	0	0	0	0	0	0	0
	207	0	0	0	0	0	0	0	0	0	0	0	0	0	0	0	0	0	0	0	0									207	0	0	0	0	0	0	0	0	0	0	0	0	0	0	0	0	0	0	0
	208	0	0	0	0	0	0	0	0	0	0	0	0	0	0	0	0	0	0	0	0									208	0	0	0	0	0	0	0	0	0	0	0	0	0	0	0	0	0	0	0
	209	0	0	0	0	0	0	0	0	0	0	0	0	0	0	0	0	0	0	0	0									209	0	0	0	0	0	0	0	0	0	0	0	0	0	0	0	0	0	0	0
	210	0	0	0	0	0	0	0	0	0	0	0	0	0	0	0	0	0	0	0	0									210	0	0	0	0	0	0	0	0	0	0	0	0	0	0	0	0	0	0	0
	211	0	0	0	0	0	0	0	0	0	0	0	0	0	0	0	0	0	0	0	0									211	0	0	0	0	0	0	0	0	0	0	0	0	0	0	0	0	0	0	0
	212	0	0	0	0	0	0	0	0	0	0	0	0	0	0	0	0	0	0	0	0									212	0	0	0	0	0	0	0	0	0	0	0	0	0	0	0	0	0	0	0
	213	0	0	0	0	0	0	0	0	0	0	0	0	0	0	0	0	0	0	0	0									213	0	0	0	0	0	0	0	0	0	0	0	0	0	0	0	0	0	0	0
	214	0	0	0	0	0	0	0	0	0	0	0	0	0	0	0	0	0	0	0	0									214	0	0	0	0	0	0	0	0	0	0	0	0	0	0	0	0	0	0	0
	215	0	0	0	0	0	0	0	0	0	0	0	0	0	0	0	0	0	0	0	0									215	0	0	0	0	0	0	0	0	0	0	0	0	0	0	0	0	0	0	0
	216	0	0	0	0	0	0	0	0	0	0	0	0	0	0	0	0	0	0	0	0									216	0	0	0	0	0	0	0	0	0	0	0	0	0	0	0	0	0	0	0
	217	0	0	0	0	0	0	0	0	0	0	0	0	0	0	0	0	0	0	0	0									217	0	0	0	0	0	0	0	0	0	0	0	0	0	0	0	0	0	0	0
	218	0	0	0	0	0	0	0	0	0	0	0	0	0	0	0	0	0	0	0	0									218	0	0	0	0	0	0	0	0	0	0	0	0	0	0	0	0	0	0	0
	219	0	0	0	0	0	0	0	0	0	0	0	0	0	0	0	0	0	0	0	0									219	0	0	0	0	0	0	0	0	0	0	0	0	0	0	0	0	0	0	0
	220	0	0	0	0	0	0	0	0	0	0	0	0	0	0	0	0	0	0	0	0									220	0	0	0	0	0	0	0	0	0	0	0	0	0	0	0	0	0	0	0
	221	0	0	0	0	0	0	0	0	0	0	0	0	0	0	0	0	0	0	0	0									221	0	0	0	0	0	0	0	0	0	0	0	0	0	0	0	0	0	0	0
	222	0	0	0	0	0	0	0	0	0	0	0	0	0	0	0	0	0	0	0	0									222	0	0	0	0	0	0	0	0	0	0	0	0	0	0	0	0	0	0	0
	223	0	0	0	0	0	0	0	0	0	0	0	0	0	0	0	0	0	0	0	0									223	0	0	0	0	0	0	0	0	0	0	0	0	0	0	0	0	0	0	0
	224	0	0	0	0	0	0	0	0	0	0	0	0	0	0	0	0	0	0	0	0									224	0	0	0	0	0	0	0	0	0	0	0	0	0	0	0	0	0	0	0
	225	0	0	0	0	0	0	0	0	0	0	0	0	0	0	0	0	0	0	0	0									225	0	0	0	0	0	0	0	0	0	0	0	0	0	0	0	0	0	0	0
	226	0	0	0	0	0	0	0	0	0	0	0	0	0	0	0	0	0	0	0	0									226	0	0	0	0	0	0	0	0	0	0	0	0	0	0	0	0	0	0	0
	227	0	0	0	0	0	0	0	0	0	0	0	0	0	0	0	0	0	0	0	0									227	0	0	0	0	0	0	0	0	0	0	0	0	0	0	0	0	0	0	0
	228	0	0	0	0	0	0	0	0	0	0	0	0	0	0	0	0	0	0	0	0									228	0	0	0	0	0	0	0	0	0	0	0	0	0	0	0	0	0	0	0
	229	0	0	0	0	0	0	0	0	0	0	0	0	0	0	0	0	0	0	0	0									229	0	0	0	0	0	0	0	0	0	0	0	0	0	0	0	0	0	0	0
	230	0	0	0	0	0	0	0	0	0	0	0	0	0	0	0	0	0	0	0	0									230	0	0	0	0	0	0	0	0	0	0	0	0	0	0	0	0	0	0	0
	231	0	0	0	0	0	0	0	0	0	0	0	0	0	0	0	0	0	0	0	0									231	0	0	0	0	0	0	0	0	0	0	0	0	0	0	0	0	0	0	0
	232	0	0	0	0	0	0	0	0	0	0	0	0	0	0	0	0	0	0	0	0									232	0	0	0	0	0	0	0	0	0	0	0	0	0	0	0	0	0	0	0
	233	0	0	0	0	0	0	0	0	0	0	0	0	0	0	0	0	0	0	0	0									233	0	0	0	0	0	0	0	0	0	0	0	0	0	0	0	0	0	0	0
	234	0	0	0	0	0	0	0	0	0	0	0	0	0	0	0	0	0	0	0	0									234	0	0	0	0	0	0	0	0	0	0	0	0	0	0	0	0	0	0	0
	235	0	0	0	0	0	0	0	0	0	0	0	0	0	0	0	0	0	0	0	0									235	0	0	0	0	0	0	0	0	0	0	0	0	0	0	0	0	0	0	0
	236	0	0	0	0	0	0	0	0	0	0	0	0	0	0	0	0	0	0	0	0									236	0	0	0	0	0	0	0	0	0	0	0	0	0	0	0	0	0	0	0
	237	0	0	0	0	0	0	0	0	0	0	0	0	0	0	0	0	0	0	0	0									237	0	0	0	0	0	0	0	0	0	0	0	0	0	0	0	0	0	0	0
	238	0	0	0	0	0	0	0	0	0	0	0	0	0	0	0	0	0	0	0	0									238	0	0	0	0	0	0	0	0	0	0	0	0	0	0	0	0	0	0	0
	239	0	0	0	0	0	0	0	0	0	0	0	0	0	0	0	0	0	0	0	0									239	0	0	0	0	0	0	0	0	0	0	0	0	0	0	0	0	0	0	0
	240	0	0	0	0	0	0	0	0	0	0	0	0	0	0	0	0	0	0	0	0									240	0	0	0	0	0	0	0	0	0	0	0	0	0	0	0	0	0	0	0
	241	0	0	0	0	0	0	0	0	0	0	0	0	0	0	0	0	0	0	0	0									241	0	0	0	0	0	0	0	0	0	0	0	0	0	0	0	0	0	0	0
	242	0	0	0	0	0	0	0	0	0	0	0	0	0	0	0	0	0	0	0	0									242	0	0	0	0	0	0	0	0	0	0	0	0	0	0	0	0	0	0	0
	243	0	0	0	0	0	0	0	0	0	0	0	0	0	0	0	0	0	0	0	0									243	0	0	0	0	0	0	0	0	0	0	0	0	0	0	0	0	0	0	0
	244	0	0	0	0	0	0	0	0	0	0	0	0	0	0	0	0	0	0	0	0									244	0	0	0	0	0	0	0	0	0	0	0	0	0	0	0	0	0	0	0
	245	0	0	0	0	0	0	0	0	0	0	0	0	0	0	0	0	0	0	0	0									245	0	0	0	0	0	0	0	0	0	0	0	0	0	0	0	0	0	0	0
	246	0	0	0	0	0	0	0	0	0	0	0	0	0	0	0	0	0	0	0	0									246	0	0	0	0	0	0	0	0	0	0	0	0	0	0	0	0	0	0	0
	247	0	0	0	0	0	0	0	0	0	0	0	0	0	0	0	0	0	0	0	0									247	0	0	0	0	0	0	0	0	0	0	0	0	0	0	0	0	0	0	0
	248	0	0	0	0	0	0	0	0	0	0	0	0	0	0	0	0	0	0	0	0									248	0	0	0	0	0	0	0	0	0	0	0	0	0	0	0	0	0	0	0
	249	0	0	0	0	0	0	0	0	0	0	0	0	0	0	0	0	0	0	0	0									249	0	0	0	0	0	0	0	0	0	0	0	0	0	0	0	0	0	0	0
	250	0	0	0	0	0	0	0	0	0	0	0	0	0	0	0	0	0	0	0	0									250	0	0	0	0	0	0	0	0	0	0	0	0	0	0	0	0	0	0	0
	251	0	0	0	0	0	0	0	0	0	0	0	0	0	0	0	0	0	0	0	0									251	0	0	0	0	0	0	0	0	0	0	0	0	0	0	0	0	0	0	0
	252	0	0	0	0	0	0	0	0	0	0	0	0	0	0	0	0	0	0	0	0									252	0	0	0	0	0	0	0	0	0	0	0	0	0	0	0	0	0	0	0
	253	0	0	0	0	0	0	0	0	0	0	0	0	0	0	0	0	0	0	0	0									253	0	0	0	0	0	0	0	0	0	0	0	0	0	0	0	0	0	0	0
	254	0	0	0	0	0	0	0	0	0	0	0	0	0	0	0	0	0	0	0	0									254	0	0	0	0	0	0	0	0	0	0	0	0	0	0	0	0	0	0	0
	255	0	0	0	0	0	0	0	0	0	0	0	0	0	0	0	0	0	0	0	0									255	0	0	0	0	0	0	0	0	0	0	0	0	0	0	0	0	0	0	0
	256	0	0	0	0	0	0	0	0	0	0	0	0	0	0	0	0	0	0	0	0									256	0	0	0	0	0	0	0	0	0	0	0	0	0	0	0	0	0	0	0
	257	0	0	0	0	0	0	0	0	0	0	0	0	0	0	0	0	0	0	0	0									257	0	0	0	0	0	0	0	0	0	0	0	0	0	0	0	0	0	0	0
	258	0	0	0	0	0	0	0	0	0	0	0	0	0	0	0	0	0	0	0	0									258	0	0	0	0	0	0	0	0	0	0	0	0	0	0	0	0	0	0	0
	259	0	0	0	0	0	0	0	0	0	0	0	0	0	0	0	0	0	0	0	0									259	0	0	0	0	0	0	0	0	0	0	0	0	0	0	0	0	0	0	0
	260	0	0	0	0	0	0	0	0	0	0	0	0	0	0	0	0	0	0	0	0									260	0	0	0	0	0	0	0	0	0	0	0	0	0	0	0	0	0	0	0
	261	0	0	0	0	0	0	0	0	0	0	0	0	0	0	0	0	0	0	0	0									261	0	0	0	0	0	0	0	0	0	0	0	0	0	0	0	0	0	0	0
	262	0	0	0	0	0	0	0	0	0	0	0	0	0	0	0	0	0	0	0	0									262	0	0	0	0	0	0	0	0	0	0	0	0	0	0	0	0	0	0	0
	263	0	0	0	0	0	0	0	0	0	0	0	0	0	0	0	0	0	0	0	0									263	0	0	0	0	0	0	0	0	0	0	0	0	0	0	0	0	0	0	0
	264	0	0	0	0	0	0	0	0	0	0	0	0	0	0	0	0	0	0	0	0									264	0	0	0	0	0	0	0	0	0	0	0	0	0	0	0	0	0	0	0
	265	0	0	0	0	0	0	0	0	0	0	0	0	0	0	0	0	0	0	0	0									265	0	0	0	0	0	0	0	0	0	0	0	0	0	0	0	0	0	0	0
	266	0	0	0	0	0	0	0	0	0	0	0	0	0	0	0	0	0	0	0	0									266	0	0	0	0	0	0	0	0	0	0	0	0	0	0	0	0	0	0	0
	267	0	0	0	0	0	0	0	0	0	0	0	0	0	0	0	0	0	0	0	0									267	0	0	0	0	0	0	0	0	0	0	0	0	0	0	0	0	0	0	0
	268	0	0	0	0	0	0	0	0	0	0	0	0	0	0	0	0	0	0	0	0									268	0	0	0	0	0	0	0	0	0	0	0	0	0	0	0	0	0	0	0
	269	0	0	0	0	0	0	0	0	0	0	0	0	0	0	0	0	0	0	0	0									269	0	0	0	0	0	0	0	0	0	0	0	0	0	0	0	0	0	0	0
	270	0	0	0	0	0	0	0	0	0	0	0	0	0	0	0	0	0	0	0	0									270	0	0	0	0	0	0	0	0	0	0	0	0	0	0	0	0	0	0	0
	271	0	0	0	0	0	0	0	0	0	0	0	0	0	0	0	0	0	0	0	0									271	0	0	0	0	0	0	0	0	0	0	0	0	0	0	0	0	0	0	0
	272	0	0	0	0	0	0	0	0	0	0	0	0	0	0	0	0	0	0	0	0									272	0	0	0	0	0	0	0	0	0	0	0	0	0	0	0	0	0	0	0
	273	0	0	0	0	0	0	0	0	0	0	0	0	0	0	0	0	0	0	0	0									273	0	0	0	0	0	0	0	0	0	0	0	0	0	0	0	0	0	0	0
	274	0	0	0	0	0	0	0	0	0	0	0	0	0	0	0	0	0	0	0	0									274	0	0	0	0	0	0	0	0	0	0	0	0	0	0	0	0	0	0	0
	275	0	0	0	0	0	0	0	0	0	0	0	0	0	0	0	0	0	0	0	0									275	0	0	0	0	0	0	0	0	0	0	0	0	0	0	0	0	0	0	0
	276	0	0	0	0	0	0	0	0	0	0	0	0	0	0	0	0	0	0	0	0									276	0	0	0	0	0	0	0	0	0	0	0	0	0	0	0	0	0	0	0
	277	0	0	0	0	0	0	0	0	0	0	0	0	0	0	0	0	0	0	0	0									277	0	0	0	0	0	0	0	0	0	0	0	0	0	0	0	0	0	0	0
	278	0	0	0	0	0	0	0	0	0	0	0	0	0	0	0	0	0	0	0	0									278	0	0	0	0	0	0	0	0	0	0	0	0	0	0	0	0	0	0	0
	279	0	0	0	0	0	0	0	0	0	0	0	0	0	0	0	0	0	0	0	0									279	0	0	0	0	0	0	0	0	0	0	0	0	0	0	0	0	0	0	0
	280	0	0	0	0	0	0	0	0	0	0	0	0	0	0	0	0	0	0	0	0									280	0	0	0	0	0	0	0	0	0	0	0	0	0	0	0	0	0	0	0
	281	0	0	0	0	0	0	0	0	0	0	0	0	0	0	0	0	0	0	0	0									281	0	0	0	0	0	0	0	0	0	0	0	0	0	0	0	0	0	0	0
	282	0	0	0	0	0	0	0	0	0	0	0	0	0	0	0	0	0	0	0	0									282	0	0	0	0	0	0	0	0	0	0	0	0	0	0	0	0	0	0	0
	283	0	0	0	0	0	0	0	0	0	0	0	0	0	0	0	0	0	0	0	0									283	0	0	0	0	0	0	0	0	0	0	0	0	0	0	0	0	0	0	0
	284	0	0	0	0	0	0	0	0	0	0	0	0	0	0	0	0	0	0	0	0									284	0	0	0	0	0	0	0	0	0	0	0	0	0	0	0	0	0	0	0
	285	0	0	0	0	0	0	0	0	0	0	0	0	0	0	0	0	0	0	0	0									285	0	0	0	0	0	0	0	0	0	0	0	0	0	0	0	0	0	0	0
	286	0	0	0	0	0	0	0	0	0	0	0	0	0	0	0	0	0	0	0	0									286	0	0	0	0	0	0	0	0	0	0	0	0	0	0	0	0	0	0	0
	287	0	0	0	0	0	0	0	0	0	0	0	0	0	0	0	0	0	0	0	0									287	0	0	0	0	0	0	0	0	0	0	0	0	0	0	0	0	0	0	0
	288	0	0	0	0	0	0	0	0	0	0	0	0	0	0	0	0	0	0	0	0									288	0	0	0	0	0	0	0	0	0	0	0	0	0	0	0	0	0	0	0
	289	0	0	0	0	0	0	0	0	0	0	0	0	0	0	0	0	0	0	0	0									289	0	0	0	0	0	0	0	0	0	0	0	0	0	0	0	0	0	0	0
	290	0	0	0	0	0	0	0	0	0	0	0	0	0	0	0	0	0	0	0	0									290	0	0	0	0	0	0	0	0	0	0	0	0	0	0	0	0	0	0	0
	291	0	0	0	0	0	0	0	0	0	0	0	0	0	0	0	0	0	0	0	0									291	0	0	0	0	0	0	0	0	0	0	0	0	0	0	0	0	0	0	0
	292	0	0	0	0	0	0	0	0	0	0	0	0	0	0	0	0	0	0	0	0									292	0	0	0	0	0	0	0	0	0	0	0	0	0	0	0	0	0	0	0
	293	0	0	0	0	0	0	0	0	0	0	0	0	0	0	0	0	0	0	0	0									293	0	0	0	0	0	0	0	0	0	0	0	0	0	0	0	0	0	0	0
	294	0	0	0	0	0	0	0	0	0	0	0	0	0	0	0	0	0	0	0	0									294	0	0	0	0	0	0	0	0	0	0	0	0	0	0	0	0	0	0	0
	295	0	0	0	0	0	0	0	0	0	0	0	0	0	0	0	0	0	0	0	0									295	0	0	0	0	0	0	0	0	0	0	0	0	0	0	0	0	0	0	0
	296	0	0	0	0	0	0	0	0	0	0	0	0	0	0	0	0	0	0	0	0									296	0	0	0	0	0	0	0	0	0	0	0	0	0	0	0	0	0	0	0
	297	0	0	0	0	0	0	0	0	0	0	0	0	0	0	0	0	0	0	0	0									297	0	0	0	0	0	0	0	0	0	0	0	0	0	0	0	0	0	0	0
	298	0	0	0	0	0	0	0	0	0	0	0	0	0	0	0	0	0	0	0	0									298	0	0	0	0	0	0	0	0	0	0	0	0	0	0	0	0	0	0	0
	299	0	0	0	0	0	0	0	0	0	0	0	0	0	0	0	0	0	0	0	0									299	0	0	0	0	0	0	0	0	0	0	0	0	0	0	0	0	0	0	0
	300	0	0	0	0	0	0	0	0	0	0	0	0	0	0	0	0	0	0	0	0									300	0	0	0	0	0	0	0	0	0	0	0	0	0	0	0	0	0	0	0
	301	0	0	0	0	0	0	0	0	0	0	0	0	0	0	0	0	0	0	0	0									301	0	0	0	0	0	0	0	0	0	0	0	0	0	0	0	0	0	0	0
	302	0	0	0	0	0	0	0	0	0	0	0	0	0	0	0	0	0	0	0	0									302	0	0	0	0	0	0	0	0	0	0	0	0	0	0	0	0	0	0	0
	303	0	0	0	0	0	0	0	0	0	0	0	0	0	0	0	0	0	0	0	0									303	0	0	0	0	0	0	0	0	0	0	0	0	0	0	0	0	0	0	0
	304	0	0	0	0	0	0	0	0	0	0	0	0	0	0	0	0	0	0	0	0									304	0	0	0	0	0	0	0	0	0	0	0	0	0	0	0	0	0	0	0
	305	0	0	0	0	0	0	0	0	0	0	0	0	0	0	0	0	0	0	0	0									305	0	0	0	0	0	0	0	0	0	0	0	0	0	0	0	0	0	0	0
	306	0	0	0	0	0	0	0	0	0	0	0	0	0	0	0	0	0	0	0	0									306	0	0	0	0	0	0	0	0	0	0	0	0	0	0	0	0	0	0	0
	307	0	0	0	0	0	0	0	0	0	0	0	0	0	0	0	0	0	0	0	0									307	0	0	0	0	0	0	0	0	0	0	0	0	0	0	0	0	0	0	0
	308	0	0	0	0	0	0	0	0	0	0	0	0	0	0	0	0	0	0	0	0									308	0	0	0	0	0	0	0	0	0	0	0	0	0	0	0	0	0	0	0
	309	0	0	0	0	0	0	0	0	0	0	0	0	0	0	0	0	0	0	0	0									309	0	0	0	0	0	0	0	0	0	0	0	0	0	0	0	0	0	0	0
	310	0	0	0	0	0	0	0	0	0	0	0	0	0	0	0	0	0	0	0	0									310	0	0	0	0	0	0	0	0	0	0	0	0	0	0	0	0	0	0	0
	311	0	0	0	0	0	0	0	0	0	0	0	0	0	0	0	0	0	0	0	0									311	0	0	0	0	0	0	0	0	0	0	0	0	0	0	0	0	0	0	0
	312	0	0	0	0	0	0	0	0	0	0	0	0	0	0	0	0	0	0	0	0									312	0	0	0	0	0	0	0	0	0	0	0	0	0	0	0	0	0	0	0
	313	0	0	0	0	0	0	0	0	0	0	0	0	0	0	0	0	0	0	0	0									313	0	0	0	0	0	0	0	0	0	0	0	0	0	0	0	0	0	0	0
	314	0	0	0	0	0	0	0	0	0	0	0	0	0	0	0	0	0	0	0	0									314	0	0	0	0	0	0	0	0	0	0	0	0	0	0	0	0	0	0	0
	315	0	0	0	0	0	0	0	0	0	0	0	0	0	0	0	0	0	0	0	0									315	0	0	0	0	0	0	0	0	0	0	0	0	0	0	0	0	0	0	0
	316	0	0	0	0	0	0	0	0	0	0	0	0	0	0	0	0	0	0	0	0									316	0	0	0	0	0	0	0	0	0	0	0	0	0	0	0	0	0	0	0
	317	0	0	0	0	0	0	0	0	0	0	0	0	0	0	0	0	0	0	0	0									317	0	0	0	0	0	0	0	0	0	0	0	0	0	0	0	0	0	0	0
	318	0	0	0	0	0	0	0	0	0	0	0	0	0	0	0	0	0	0	0	0									318	0	0	0	0	0	0	0	0	0	0	0	0	0	0	0	0	0	0	0
	319	0	0	0	0	0	0	0	0	0	0	0	0	0	0	0	0	0	0	0	0									319	0	0	0	0	0	0	0	0	0	0	0	0	0	0	0	0	0	0	0
	320	0	0	0	0	0	0	0	0	0	0	0	0	0	0	0	0	0	0	0	0									320	0	0	0	0	0	0	0	0	0	0	0	0	0	0	0	0	0	0	0
	321	0	0	0	0	0	0	0	0	0	0	0	0	0	0	0	0	0	0	0	0									321	0	0	0	0	0	0	0	0	0	0	0	0	0	0	0	0	0	0	0
	322	0	0	0	0	0	0	0	0	0	0	0	0	0	0	0	0	0	0	0	0									322	0	0	0	0	0	0	0	0	0	0	0	0	0	0	0	0	0	0	0
	323	0	0	0	0	0	0	0	0	0	0	0	0	0	0	0	0	0	0	0	0									323	0	0	0	0	0	0	0	0	0	0	0	0	0	0	0	0	0	0	0
	324	0	0	0	0	0	0	0	0	0	0	0	0	0	0	0	0	0	0	0	0									324	0	0	0	0	0	0	0	0	0	0	0	0	0	0	0	0	0	0	0
	325	0	0	0	0	0	0	0	0	0	0	0	0	0	0	0	0	0	0	0	0									325	0	0	0	0	0	0	0	0	0	0	0	0	0	0	0	0	0	0	0
	326	0	0	0	0	0	0	0	0	0	0	0	0	0	0	0	0	0	0	0	0									326	0	0	0	0	0	0	0	0	0	0	0	0	0	0	0	0	0	0	0
	327	0	0	0	0	0	0	0	0	0	0	0	0	0	0	0	0	0	0	0	0									327	0	0	0	0	0	0	0	0	0	0	0	0	0	0	0	0	0	0	0
	328	0	0	0	0	0	0	0	0	0	0	0	0	0	0	0	0	0	0	0	0									328	0	0	0	0	0	0	0	0	0	0	0	0	0	0	0	0	0	0	0
	329	0	0	0	0	0	0	0	0	0	0	0	0	0	0	0	0	0	0	0	0									329	0	0	0	0	0	0	0	0	0	0	0	0	0	0	0	0	0	0	0
	330	0	0	0	0	0	0	0	0	0	0	0	0	0	0	0	0	0	0	0	0									330	0	0	0	0	0	0	0	0	0	0	0	0	0	0	0	0	0	0	0
	331	0	0	0	0	0	0	0	0	0	0	0	0	0	0	0	0	0	0	0	0									331	0	0	0	0	0	0	0	0	0	0	0	0	0	0	0	0	0	0	0
	332	0	0	0	0	0	0	0	0	0	0	0	0	0	0	0	0	0	0	0	0									332	0	0	0	0	0	0	0	0	0	0	0	0	0	0	0	0	0	0	0
	333	0	0	0	0	0	0	0	0	0	0	0	0	0	0	0	0	0	0	0	0									333	0	0	0	0	0	0	0	0	0	0	0	0	0	0	0	0	0	0	0
	334	0	0	0	0	0	0	0	0	0	0	0	0	0	0	0	0	0	0	0	0									334	0	0	0	0	0	0	0	0	0	0	0	0	0	0	0	0	0	0	0
	335	0	0	0	0	0	0	0	0	0	0	0	0	0	0	0	0	0	0	0	0									335	0	0	0	0	0	0	0	0	0	0	0	0	0	0	0	0	0	0	0
	336	0	0	0	0	0	0	0	0	0	0	0	0	0	0	0	0	0	0	0	0									336	0	0	0	0	0	0	0	0	0	0	0	0	0	0	0	0	0	0	0
	337	0	0	0	0	0	0	0	0	0	0	0	0	0	0	0	0	0	0	0	0									337	0	0	0	0	0	0	0	0	0	0	0	0	0	0	0	0	0	0	0
	338	0	0	0	0	0	0	0	0	0	0	0	0	0	0	0	0	0	0	0	0									338	0	0	0	0	0	0	0	0	0	0	0	0	0	0	0	0	0	0	0
	339	0	0	0	0	0	0	0	0	0	0	0	0	0	0	0	0	0	0	0	0									339	0	0	0	0	0	0	0	0	0	0	0	0	0	0	0	0	0	0	0
	340	0	0	0	0	0	0	0	0	0	0	0	0	0	0	0	0	0	0	0	0									340	0	0	0	0	0	0	0	0	0	0	0	0	0	0	0	0	0	0	0
	341	0	0	0	0	0	0	0	0	0	0	0	0	0	0	0	0	0	0	0	0									341	0	0	0	0	0	0	0	0	0	0	0	0	0	0	0	0	0	0	0
	342	0	0	0	0	0	0	0	0	0	0	0	0	0	0	0	0	0	0	0	0									342	0	0	0	0	0	0	0	0	0	0	0	0	0	0	0	0	0	0	0
	343	0	0	0	0	0	0	0	0	0	0	0	0	0	0	0	0	0	0	0	0									343	0	0	0	0	0	0	0	0	0	0	0	0	0	0	0	0	0	0	0
	344	0	0	0	0	0	0	0	0	0	0	0	0	0	0	0	0	0	0	0	0									344	0	0	0	0	0	0	0	0	0	0	0	0	0	0	0	0	0	0	0
	345	0	0	0	0	0	0	0	0	0	0	0	0	0	0	0	0	0	0	0	0									345	0	0	0	0	0	0	0	0	0	0	0	0	0	0	0	0	0	0	0
	346	0	0	0	0	0	0	0	0	0	0	0	0	0	0	0	0	0	0	0	0									346	0	0	0	0	0	0	0	0	0	0	0	0	0	0	0	0	0	0	0
	347	0	0	0	0	0	0	0	0	0	0	0	0	0	0	0	0	0	0	0	0									347	0	0	0	0	0	0	0	0	0	0	0	0	0	0	0	0	0	0	0
	348	0	0	0	0	0	0	0	0	0	0	0	0	0	0	0	0	0	0	0	0									348	0	0	0	0	0	0	0	0	0	0	0	0	0	0	0	0	0	0	0
	349	0	0	0	0	0	0	0	0	0	0	0	0	0	0	0	0	0	0	0	0									349	0	0	0	0	0	0	0	0	0	0	0	0	0	0	0	0	0	0	0
	350	0	0	0	0	0	0	0	0	0	0	0	0	0	0	0	0	0	0	0	0									350	0	0	0	0	0	0	0	0	0	0	0	0	0	0	0	0	0	0	0
	351	0	0	0	0	0	0	0	0	0	0	0	0	0	0	0	0	0	0	0	0									351	0	0	0	0	0	0	0	0	0	0	0	0	0	0	0	0	0	0	0
	352	0	0	0	0	0	0	0	0	0	0	0	0	0	0	0	0	0	0	0	0									352	0	0	0	0	0	0	0	0	0	0	0	0	0	0	0	0	0	0	0
	353	0	0	0	0	0	0	0	0	0	0	0	0	0	0	0	0	0	0	0	0									353	0	0	0	0	0	0	0	0	0	0	0	0	0	0	0	0	0	0	0
	354	0	0	0	0	0	0	0	0	0	0	0	0	0	0	0	0	0	0	0	0									354	0	0	0	0	0	0	0	0	0	0	0	0	0	0	0	0	0	0	0
	355	0	0	0	0	0	0	0	0	0	0	0	0	0	0	0	0	0	0	0	0									355	0	0	0	0	0	0	0	0	0	0	0	0	0	0	0	0	0	0	0
	356	0	0	0	0	0	0	0	0	0	0	0	0	0	0	0	0	0	0	0	0									356	0	0	0	0	0	0	0	0	0	0	0	0	0	0	0	0	0	0	0
	357	0	0	0	0	0	0	0	0	0	0	0	0	0	0	0	0	0	0	0	0									357	0	0	0	0	0	0	0	0	0	0	0	0	0	0	0	0	0	0	0
	358	0	0	0	0	0	0	0	0	0	0	0	0	0	0	0	0	0	0	0	0									358	0	0	0	0	0	0	0	0	0	0	0	0	0	0	0	0	0	0	0
	359	0	0	0	0	0	0	0	0	0	0	0	0	0	0	0	0	0	0	0	0									359	0	0	0	0	0	0	0	0	0	0	0	0	0	0	0	0	0	0	0
	360	0	0	0	0	0	0	0	0	0	0	0	0	0	0	0	0	0	0	0	0									360	0	0	0	0	0	0	0	0	0	0	0	0	0	0	0	0	0	0	0
	361	0	0	0	0	0	0	0	0	0	0	0	0	0	0	0	0	0	0	0	0									361	0	0	0	0	0	0	0	0	0	0	0	0	0	0	0	0	0	0	0
	362	0	0	0	0	0	0	0	0	0	0	0	0	0	0	0	0	0	0	0	0									362	0	0	0	0	0	0	0	0	0	0	0	0	0	0	0	0	0	0	0
	363	0	0	0	0	0	0	0	0	0	0	0	0	0	0	0	0	0	0	0	0									363	0	0	0	0	0	0	0	0	0	0	0	0	0	0	0	0	0	0	0
	364	0	0	0	0	0	0	0	0	0	0	0	0	0	0	0	0	0	0	0	0									364	0	0	0	0	0	0	0	0	0	0	0	0	0	0	0	0	0	0	0
	365	0	0	0	0	0	0	0	0	0	0	0	0	0	0	0	0	0	0	0	0									365	0	0	0	0	0	0	0	0	0	0	0	0	0	0	0	0	0	0	0
	366	0	0	0	0	0	0	0	0	0	0	0	0	0	0	0	0	0	0	0	0									366	0	0	0	0	0	0	0	0	0	0	0	0	0	0	0	0	0	0	0
	367	0	0	0	0	0	0	0	0	0	0	0	0	0	0	0	0	0	0	0	0									367	0	0	0	0	0	0	0	0	0	0	0	0	0	0	0	0	0	0	0
	368	0	0	0	0	0	0	0	0	0	0	0	0	0	0	0	0	0	0	0	0									368	0	0	0	0	0	0	0	0	0	0	0	0	0	0	0	0	0	0	0
	369	0	0	0	0	0	0	0	0	0	0	0	0	0	0	0	0	0	0	0	0									369	0	0	0	0	0	0	0	0	0	0	0	0	0	0	0	0	0	0	0
	370	0	0	0	0	0	0	0	0	0	0	0	0	0	0	0	0	0	0	0	0									370	0	0	0	0	0	0	0	0	0	0	0	0	0	0	0	0	0	0	0
	371	0	0	0	0	0	0	0	0	0	0	0	0	0	0	0	0	0	0	0	0									371	0	0	0	0	0	0	0	0	0	0	0	0	0	0	0	0	0	0	0
	372	0	0	0	0	0	0	0	0	0	0	0	0	0	0	0	0	0	0	0	0									372	0	0	0	0	0	0	0	0	0	0	0	0	0	0	0	0	0	0	0
	373	0	0	0	0	0	0	0	0	0	0	0	0	0	0	0	0	0	0	0	0									373	0	0	0	0	0	0	0	0	0	0	0	0	0	0	0	0	0	0	0
	374	0	0	0	0	0	0	0	0	0	0	0	0	0	0	0	0	0	0	0	0									374	0	0	0	0	0	0	0	0	0	0	0	0	0	0	0	0	0	0	0
	375	0	0	0	0	0	0	0	0	0	0	0	0	0	0	0	0	0	0	0	0									375	0	0	0	0	0	0	0	0	0	0	0	0	0	0	0	0	0	0	0
	376	0	0	0	0	0	0	0	0	0	0	0	0	0	0	0	0	0	0	0	0									376	0	0	0	0	0	0	0	0	0	0	0	0	0	0	0	0	0	0	0
	377	0	0	0	0	0	0	0	0	0	0	0	0	0	0	0	0	0	0	0	0									377	0	0	0	0	0	0	0	0	0	0	0	0	0	0	0	0	0	0	0
	378	0	0	0	0	0	0	0	0	0	0	0	0	0	0	0	0	0	0	0	0									378	0	0	0	0	0	0	0	0	0	0	0	0	0	0	0	0	0	0	0
	379	0	0	0	0	0	0	0	0	0	0	0	0	0	0	0	0	0	0	0	0									379	0	0	0	0	0	0	0	0	0	0	0	0	0	0	0	0	0	0	0
	380	0	0	0	0	0	0	0	0	0	0	0	0	0	0	0	0	0	0	0	0									380	0	0	0	0	0	0	0	0	0	0	0	0	0	0	0	0	0	0	0
	381	0	0	0	0	0	0	0	0	0	0	0	0	0	0	0	0	0	0	0	0									381	0	0	0	0	0	0	0	0	0	0	0	0	0	0	0	0	0	0	0
	382	0	0	0	0	0	0	0	0	0	0	0	0	0	0	0	0	0	0	0	0									382	0	0	0	0	0	0	0	0	0	0	0	0	0	0	0	0	0	0	0
	383	0	0	0	0	0	0	0	0	0	0	0	0	0	0	0	0	0	0	0	0									383	0	0	0	0	0	0	0	0	0	0	0	0	0	0	0	0	0	0	0
	384	0	0	0	0	0	0	0	0	0	0	0	0	0	0	0	0	0	0	0	0									384	0	0	0	0	0	0	0	0	0	0	0	0	0	0	0	0	0	0	0
	385	0	0	0	0	0	0	0	0	0	0	0	0	0	0	0	0	0	0	0	0									385	0	0	0	0	0	0	0	0	0	0	0	0	0	0	0	0	0	0	0
	386	0	0	0	0	0	0	0	0	0	0	0	0	0	0	0	0	0	0	0	0									386	0	0	0	0	0	0	0	0	0	0	0	0	0	0	0	0	0	0	0
	387	0	0	0	0	0	0	0	0	0	0	0	0	0	0	0	0	0	0	0	0									387	0	0	0	0	0	0	0	0	0	0	0	0	0	0	0	0	0	0	0
	388	0	0	0	0	0	0	0	0	0	0	0	0	0	0	0	0	0	0	0	0									388	0	0	0	0	0	0	0	0	0	0	0	0	0	0	0	0	0	0	0
	389	0	0	0	0	0	0	0	0	0	0	0	0	0	0	0	0	0	0	0	0									389	0	0	0	0	0	0	0	0	0	0	0	0	0	0	0	0	0	0	0
	390	0	0	0	0	0	0	0	0	0	0	0	0	0	0	0	0	0	0	0	0									390	0	0	0	0	0	0	0	0	0	0	0	0	0	0	0	0	0	0	0
	391	0	0	0	0	0	0	0	0	0	0	0	0	0	0	0	0	0	0	0	0									391	0	0	0	0	0	0	0	0	0	0	0	0	0	0	0	0	0	0	0
	392	0	0	0	0	0	0	0	0	0	0	0	0	0	0	0	0	0	0	0	0									392	0	0	0	0	0	0	0	0	0	0	0	0	0	0	0	0	0	0	0
	393	0	0	0	0	0	0	0	0	0	0	0	0	0	0	0	0	0	0	0	0									393	0	0	0	0	0	0	0	0	0	0	0	0	0	0	0	0	0	0	0
	394	0	0	0	0	0	0	0	0	0	0	0	0	0	0	0	0	0	0	0	0									394	0	0	0	0	0	0	0	0	0	0	0	0	0	0	0	0	0	0	0
	395	0	0	0	0	0	0	0	0	0	0	0	0	0	0	0	0	0	0	0	0									395	0	0	0	0	0	0	0	0	0	0	0	0	0	0	0	0	0	0	0
	396	0	0	0	0	0	0	0	0	0	0	0	0	0	0	0	0	0	0	0	0									396	0	0	0	0	0	0	0	0	0	0	0	0	0	0	0	0	0	0	0
	397	0	0	0	0	0	0	0	0	0	0	0	0	0	0	0	0	0	0	0	0									397	0	0	0	0	0	0	0	0	0	0	0	0	0	0	0	0	0	0	0
	398	0	0	0	0	0	0	0	0	0	0	0	0	0	0	0	0	0	0	0	0									398	0	0	0	0	0	0	0	0	0	0	0	0	0	0	0	0	0	0	0
	399	0	0	0	0	0	0	0	0	0	0	0	0	0	0	0	0	0	0	0	0									399	0	0	0	0	0	0	0	0	0	0	0	0	0	0	0	0	0	0	0
	400	0	0	0	0	0	0	0	0	0	0	0	0	0	0	0	0	0	0	0	0									400	0	0	0	0	0	0	0	0	0	0	0	0	0	0	0	0	0	0	0
	401	0	0	0	0	0	0	0	0	0	0	0	0	0	0	0	0	0	0	0	0									401	0	0	0	0	0	0	0	0	0	0	0	0	0	0	0	0	0	0	0
	402	0	0	0	0	0	0	0	0	0	0	0	0	0	0	0	0	0	0	0	0									402	0	0	0	0	0	0	0	0	0	0	0	0	0	0	0	0	0	0	0
	403	0	0	0	0	0	0	0	0	0	0	0	0	0	0	0	0	0	0	0	0									403	0	0	0	0	0	0	0	0	0	0	0	0	0	0	0	0	0	0	0
	404	0	0	0	0	0	0	0	0	0	0	0	0	0	0	0	0	0	0	0	0									404	0	0	0	0	0	0	0	0	0	0	0	0	0	0	0	0	0	0	0
	405	0	0	0	0	0	0	0	0	0	0	0	0	0	0	0	0	0	0	0	0									405	0	0	0	0	0	0	0	0	0	0	0	0	0	0	0	0	0	0	0
	406	0	0	0	0	0	0	0	0	0	0	0	0	0	0	0	0	0	0	0	0									406	0	0	0	0	0	0	0	0	0	0	0	0	0	0	0	0	0	0	0
	407	0	0	0	0	0	0	0	0	0	0	0	0	0	0	0	0	0	0	0	0									407	0	0	0	0	0	0	0	0	0	0	0	0	0	0	0	0	0	0	0
	408	0	0	0	0	0	0	0	0	0	0	0	0	0	0	0	0	0	0	0	0									408	0	0	0	0	0	0	0	0	0	0	0	0	0	0	0	0	0	0	0
	409	0	0	0	0	0	0	0	0	0	0	0	0	0	0	0	0	0	0	0	0									409	0	0	0	0	0	0	0	0	0	0	0	0	0	0	0	0	0	0	0
	410	0	0	0	0	0	0	0	0	0	0	0	0	0	0	0	0	0	0	0	0									410	0	0	0	0	0	0	0	0	0	0	0	0	0	0	0	0	0	0	0
	411	0	0	0	0	0	0	0	0	0	0	0	0	0	0	0	0	0	0	0	0									411	0	0	0	0	0	0	0	0	0	0	0	0	0	0	0	0	0	0	0
	412	0	0	0	0	0	0	0	0	0	0	0	0	0	0	0	0	0	0	0	0									412	0	0	0	0	0	0	0	0	0	0	0	0	0	0	0	0	0	0	0
	413	0	0	0	0	0	0	0	0	0	0	0	0	0	0	0	0	0	0	0	0									413	0	0	0	0	0	0	0	0	0	0	0	0	0	0	0	0	0	0	0
	414	0	0	0	0	0	0	0	0	0	0	0	0	0	0	0	0	0	0	0	0									414	0	0	0	0	0	0	0	0	0	0	0	0	0	0	0	0	0	0	0
	415	0	0	0	0	0	0	0	0	0	0	0	0	0	0	0	0	0	0	0	0									415	0	0	0	0	0	0	0	0	0	0	0	0	0	0	0	0	0	0	0
	416	0	0	0	0	0	0	0	0	0	0	0	0	0	0	0	0	0	0	0	0									416	0	0	0	0	0	0	0	0	0	0	0	0	0	0	0	0	0	0	0
	417	0	0	0	0	0	0	0	0	0	0	0	0	0	0	0	0	0	0	0	0									417	0	0	0	0	0	0	0	0	0	0	0	0	0	0	0	0	0	0	0
	418	0	0	0	0	0	0	0	0	0	0	0	0	0	0	0	0	0	0	0	0									418	0	0	0	0	0	0	0	0	0	0	0	0	0	0	0	0	0	0	0
	419	0	0	0	0	0	0	0	0	0	0	0	0	0	0	0	0	0	0	0	0									419	0	0	0	0	0	0	0	0	0	0	0	0	0	0	0	0	0	0	0
	420	0	0	0	0	0	0	0	0	0	0	0	0	0	0	0	0	0	0	0	0									420	0	0	0	0	0	0	0	0	0	0	0	0	0	0	0	0	0	0	0
	421	0	0	0	0	0	0	0	0	0	0	0	0	0	0	0	0	0	0	0	0									421	0	0	0	0	0	0	0	0	0	0	0	0	0	0	0	0	0	0	0
	422	0	0	0	0	0	0	0	0	0	0	0	0	0	0	0	0	0	0	0	0									422	0	0	0	0	0	0	0	0	0	0	0	0	0	0	0	0	0	0	0
	423	0	0	0	0	0	0	0	0	0	0	0	0	0	0	0	0	0	0	0	0									423	0	0	0	0	0	0	0	0	0	0	0	0	0	0	0	0	0	0	0
	424	0	0	0	0	0	0	0	0	0	0	0	0	0	0	0	0	0	0	0	0									424	0	0	0	0	0	0	0	0	0	0	0	0	0	0	0	0	0	0	0
	425	0	0	0	0	0	0	0	0	0	0	0	0	0	0	0	0	0	0	0	0									425	0	0	0	0	0	0	0	0	0	0	0	0	0	0	0	0	0	0	0
	426	0	0	0	0	0	0	0	0	0	0	0	0	0	0	0	0	0	0	0	0									426	0	0	0	0	0	0	0	0	0	0	0	0	0	0	0	0	0	0	0
	427	0	0	0	0	0	0	0	0	0	0	0	0	0	0	0	0	0	0	0	0									427	0	0	0	0	0	0	0	0	0	0	0	0	0	0	0	0	0	0	0
	428	0	0	0	0	0	0	0	0	0	0	0	0	0	0	0	0	0	0	0	0									428	0	0	0	0	0	0	0	0	0	0	0	0	0	0	0	0	0	0	0
	429	0	0	0	0	0	0	0	0	0	0	0	0	0	0	0	0	0	0	0	0									429	0	0	0	0	0	0	0	0	0	0	0	0	0	0	0	0	0	0	0
	430	0	0	0	0	0	0	0	0	0	0	0	0	0	0	0	0	0	0	0	0									430	0	0	0	0	0	0	0	0	0	0	0	0	0	0	0	0	0	0	0
	431	0	0	0	0	0	0	0	0	0	0	0	0	0	0	0	0	0	0	0	0									431	0	0	0	0	0	0	0	0	0	0	0	0	0	0	0	0	0	0	0
	432	0	0	0	0	0	0	0	0	0	0	0	0	0	0	0	0	0	0	0	0									432	0	0	0	0	0	0	0	0	0	0	0	0	0	0	0	0	0	0	0
	433	0	0	0	0	0	0	0	0	0	0	0	0	0	0	0	0	0	0	0	0									433	0	0	0	0	0	0	0	0	0	0	0	0	0	0	0	0	0	0	0
	434	0	0	0	0	0	0	0	0	0	0	0	0	0	0	0	0	0	0	0	0									434	0	0	0	0	0	0	0	0	0	0	0	0	0	0	0	0	0	0	0
	435	0	0	0	0	0	0	0	0	0	0	0	0	0	0	0	0	0	0	0	0									435	0	0	0	0	0	0	0	0	0	0	0	0	0	0	0	0	0	0	0
	436	0	0	0	0	0	0	0	0	0	0	0	0	0	0	0	0	0	0	0	0									436	0	0	0	0	0	0	0	0	0	0	0	0	0	0	0	0	0	0	0
	437	0	0	0	0	0	0	0	0	0	0	0	0	0	0	0	0	0	0	0	0									437	0	0	0	0	0	0	0	0	0	0	0	0	0	0	0	0	0	0	0
	438	0	0	0	0	0	0	0	0	0	0	0	0	0	0	0	0	0	0	0	0									438	0	0	0	0	0	0	0	0	0	0	0	0	0	0	0	0	0	0	0
	439	0	0	0	0	0	0	0	0	0	0	0	0	0	0	0	0	0	0	0	0									439	0	0	0	0	0	0	0	0	0	0	0	0	0	0	0	0	0	0	0
	440	0	0	0	0	0	0	0	0	0	0	0	0	0	0	0	0	0	0	0	0									440	0	0	0	0	0	0	0	0	0	0	0	0	0	0	0	0	0	0	0
	441	0	0	0	0	0	0	0	0	0	0	0	0	0	0	0	0	0	0	0	0									441	0	0	0	0	0	0	0	0	0	0	0	0	0	0	0	0	0	0	0
	442	0	0	0	0	0	0	0	0	0	0	0	0	0	0	0	0	0	0	0	0									442	0	0	0	0	0	0	0	0	0	0	0	0	0	0	0	0	0	0	0
	443	0	0	0	0	0	0	0	0	0	0	0	0	0	0	0	0	0	0	0	0									443	0	0	0	0	0	0	0	0	0	0	0	0	0	0	0	0	0	0	0
	444	0	0	0	0	0	0	0	0	0	0	0	0	0	0	0	0	0	0	0	0									444	0	0	0	0	0	0	0	0	0	0	0	0	0	0	0	0	0	0	0
	445	0	0	0	0	0	0	0	0	0	0	0	0	0	0	0	0	0	0	0	0									445	0	0	0	0	0	0	0	0	0	0	0	0	0	0	0	0	0	0	0
	446	0	0	0	0	0	0	0	0	0	0	0	0	0	0	0	0	0	0	0	0									446	0	0	0	0	0	0	0	0	0	0	0	0	0	0	0	0	0	0	0
	447	0	0	0	0	0	0	0	0	0	0	0	0	0	0	0	0	0	0	0	0									447	0	0	0	0	0	0	0	0	0	0	0	0	0	0	0	0	0	0	0
	448	0	0	0	0	0	0	0	0	0	0	0	0	0	0	0	0	0	0	0	0									448	0	0	0	0	0	0	0	0	0	0	0	0	0	0	0	0	0	0	0
	449	0	0	0	0	0	0	0	0	0	0	0	0	0	0	0	0	0	0	0	0									449	0	0	0	0	0	0	0	0	0	0	0	0	0	0	0	0	0	0	0
	450	0	0	0	0	0	0	0	0	0	0	0	0	0	0	0	0	0	0	0	0									450	0	0	0	0	0	0	0	0	0	0	0	0	0	0	0	0	0	0	0
	451	0	0	0	0	0	0	0	0	0	0	0	0	0	0	0	0	0	0	0	0									451	0	0	0	0	0	0	0	0	0	0	0	0	0	0	0	0	0	0	0
	452	0	0	0	0	0	0	0	0	0	0	0	0	0	0	0	0	0	0	0	0									452	0	0	0	0	0	0	0	0	0	0	0	0	0	0	0	0	0	0	0
	453	0	0	0	0	0	0	0	0	0	0	0	0	0	0	0	0	0	0	0	0									453	0	0	0	0	0	0	0	0	0	0	0	0	0	0	0	0	0	0	0
	454	0	0	0	0	0	0	0	0	0	0	0	0	0	0	0	0	0	0	0	0									454	0	0	0	0	0	0	0	0	0	0	0	0	0	0	0	0	0	0	0
	455	0	0	0	0	0	0	0	0	0	0	0	0	0	0	0	0	0	0	0	0									455	0	0	0	0	0	0	0	0	0	0	0	0	0	0	0	0	0	0	0
	456	0	0	0	0	0	0	0	0	0	0	0	0	0	0	0	0	0	0	0	0									456	0	0	0	0	0	0	0	0	0	0	0	0	0	0	0	0	0	0	0
	457	0	0	0	0	0	0	0	0	0	0	0	0	0	0	0	0	0	0	0	0									457	0	0	0	0	0	0	0	0	0	0	0	0	0	0	0	0	0	0	0
	458	0	0	0	0	0	0	0	0	0	0	0	0	0	0	0	0	0	0	0	0									458	0	0	0	0	0	0	0	0	0	0	0	0	0	0	0	0	0	0	0
	459	0	0	0	0	0	0	0	0	0	0	0	0	0	0	0	0	0	0	0	0									459	0	0	0	0	0	0	0	0	0	0	0	0	0	0	0	0	0	0	0
	460	0	0	0	0	0	0	0	0	0	0	0	0	0	0	0	0	0	0	0	0									460	0	0	0	0	0	0	0	0	0	0	0	0	0	0	0	0	0	0	0
	461	0	0	0	0	0	0	0	0	0	0	0	0	0	0	0	0	0	0	0	0									461	0	0	0	0	0	0	0	0	0	0	0	0	0	0	0	0	0	0	0
	462	0	0	0	0	0	0	0	0	0	0	0	0	0	0	0	0	0	0	0	0									462	0	0	0	0	0	0	0	0	0	0	0	0	0	0	0	0	0	0	0
	463	0	0	0	0	0	0	0	0	0	0	0	0	0	0	0	0	0	0	0	0									463	0	0	0	0	0	0	0	0	0	0	0	0	0	0	0	0	0	0	0
	464	0	0	0	0	0	0	0	0	0	0	0	0	0	0	0	0	0	0	0	0									464	0	0	0	0	0	0	0	0	0	0	0	0	0	0	0	0	0	0	0
	465	0	0	0	0	0	0	0	0	0	0	0	0	0	0	0	0	0	0	0	0									465	0	0	0	0	0	0	0	0	0	0	0	0	0	0	0	0	0	0	0
	466	0	0	0	0	0	0	0	0	0	0	0	0	0	0	0	0	0	0	0	0									466	0	0	0	0	0	0	0	0	0	0	0	0	0	0	0	0	0	0	0
	467	0	0	0	0	0	0	0	0	0	0	0	0	0	0	0	0	0	0	0	0									467	0	0	0	0	0	0	0	0	0	0	0	0	0	0	0	0	0	0	0
	468	0	0	0	0	0	0	0	0	0	0	0	0	0	0	0	0	0	0	0	0									468	0	0	0	0	0	0	0	0	0	0	0	0	0	0	0	0	0	0	0
	469	0	0	0	0	0	0	0	0	0	0	0	0	0	0	0	0	0	0	0	0									469	0	0	0	0	0	0	0	0	0	0	0	0	0	0	0	0	0	0	0
	470	0	0	0	0	0	0	0	0	0	0	0	0	0	0	0	0	0	0	0	0									470	0	0	0	0	0	0	0	0	0	0	0	0	0	0	0	0	0	0	0
	471	0	0	0	0	0	0	0	0	0	0	0	0	0	0	0	0	0	0	0	0									471	0	0	0	0	0	0	0	0	0	0	0	0	0	0	0	0	0	0	0
	472	0	0	0	0	0	0	0	0	0	0	0	0	0	0	0	0	0	0	0	0									472	0	0	0	0	0	0	0	0	0	0	0	0	0	0	0	0	0	0	0
	473	0	0	0	0	0	0	0	0	0	0	0	0	0	0	0	0	0	0	0	0									473	0	0	0	0	0	0	0	0	0	0	0	0	0	0	0	0	0	0	0
	474	0	0	0	0	0	0	0	0	0	0	0	0	0	0	0	0	0	0	0	0									474	0	0	0	0	0	0	0	0	0	0	0	0	0	0	0	0	0	0	0
	475	0	0	0	0	0	0	0	0	0	0	0	0	0	0	0	0	0	0	0	0									475	0	0	0	0	0	0	0	0	0	0	0	0	0	0	0	0	0	0	0
	476	0	0	0	0	0	0	0	0	0	0	0	0	0	0	0	0	0	0	0	0									476	0	0	0	0	0	0	0	0	0	0	0	0	0	0	0	0	0	0	0
	477	0	0	0	0	0	0	0	0	0	0	0	0	0	0	0	0	0	0	0	0									477	0	0	0	0	0	0	0	0	0	0	0	0	0	0	0	0	0	0	0
	478	0	0	0	0	0	0	0	0	0	0	0	0	0	0	0	0	0	0	0	0									478	0	0	0	0	0	0	0	0	0	0	0	0	0	0	0	0	0	0	0
	479	0	0	0	0	0	0	0	0	0	0	0	0	0	0	0	0	0	0	0	0									479	0	0	0	0	0	0	0	0	0	0	0	0	0	0	0	0	0	0	0
	480	0	0	0	0	0	0	0	0	0	0	0	0	0	0	0	0	0	0	0	0									480	0	0	0	0	0	0	0	0	0	0	0	0	0	0	0	0	0	0	0
	481	0	0	0	0	0	0	0	0	0	0	0	0	0	0	0	0	0	0	0	0									481	0	0	0	0	0	0	0	0	0	0	0	0	0	0	0	0	0	0	0
	482	0	0	0	0	0	0	0	0	0	0	0	0	0	0	0	0	0	0	0	0									482	0	0	0	0	0	0	0	0	0	0	0	0	0	0	0	0	0	0	0
	483	0	0	0	0	0	0	0	0	0	0	0	0	0	0	0	0	0	0	0	0									483	0	0	0	0	0	0	0	0	0	0	0	0	0	0	0	0	0	0	0
	484	0	0	0	0	0	0	0	0	0	0	0	0	0	0	0	0	0	0	0	0									484	0	0	0	0	0	0	0	0	0	0	0	0	0	0	0	0	0	0	0
	485	0	0	0	0	0	0	0	0	0	0	0	0	0	0	0	0	0	0	0	0									485	0	0	0	0	0	0	0	0	0	0	0	0	0	0	0	0	0	0	0
	486	0	0	0	0	0	0	0	0	0	0	0	0	0	0	0	0	0	0	0	0									486	0	0	0	0	0	0	0	0	0	0	0	0	0	0	0	0	0	0	0
	487	0	0	0	0	0	0	0	0	0	0	0	0	0	0	0	0	0	0	0	0									487	0	0	0	0	0	0	0	0	0	0	0	0	0	0	0	0	0	0	0
	488	0	0	0	0	0	0	0	0	0	0	0	0	0	0	0	0	0	0	0	0									488	0	0	0	0	0	0	0	0	0	0	0	0	0	0	0	0	0	0	0
	489	0	0	0	0	0	0	0	0	0	0	0	0	0	0	0	0	0	0	0	0									489	0	0	0	0	0	0	0	0	0	0	0	0	0	0	0	0	0	0	0
	490	0	0	0	0	0	0	0	0	0	0	0	0	0	0	0	0	0	0	0	0									490	0	0	0	0	0	0	0	0	0	0	0	0	0	0	0	0	0	0	0
	491	0	0	0	0	0	0	0	0	0	0	0	0	0	0	0	0	0	0	0	0									491	0	0	0	0	0	0	0	0	0	0	0	0	0	0	0	0	0	0	0
	492	0	0	0	0	0	0	0	0	0	0	0	0	0	0	0	0	0	0	0	0									492	0	0	0	0	0	0	0	0	0	0	0	0	0	0	0	0	0	0	0
	493	0	0	0	0	0	0	0	0	0	0	0	0	0	0	0	0	0	0	0	0									493	0	0	0	0	0	0	0	0	0	0	0	0	0	0	0	0	0	0	0
	494	0	0	0	0	0	0	0	0	0	0	0	0	0	0	0	0	0	0	0	0									494	0	0	0	0	0	0	0	0	0	0	0	0	0	0	0	0	0	0	0
	495	0	0	0	0	0	0	0	0	0	0	0	0	0	0	0	0	0	0	0	0									495	0	0	0	0	0	0	0	0	0	0	0	0	0	0	0	0	0	0	0
	496	0	0	0	0	0	0	0	0	0	0	0	0	0	0	0	0	0	0	0	0									496	0	0	0	0	0	0	0	0	0	0	0	0	0	0	0	0	0	0	0
	497	0	0	0	0	0	0	0	0	0	0	0	0	0	0	0	0	0	0	0	0									497	0	0	0	0	0	0	0	0	0	0	0	0	0	0	0	0	0	0	0
	498	0	0	0	0	0	0	0	0	0	0	0	0	0	0	0	0	0	0	0	0									498	0	0	0	0	0	0	0	0	0	0	0	0	0	0	0	0	0	0	0
	499	0	0	0	0	0	0	0	0	0	0	0	0	0	0	0	0	0	0	0	0									499	0	0	0	0	0	0	0	0	0	0	0	0	0	0	0	0	0	0	0
	500	0	0	0	0	0	0	0	0	0	0	0	0	0	0	0	0	0	0	0	0									500	0	0	0	0	0	0	0	0	0	0	0	0	0	0	0	0	0	0	0
	501	0	0	0	0	0	0	0	0	0	0	0	0	0	0	0	0	0	0	0	0									501	0	0	0	0	0	0	0	0	0	0	0	0	0	0	0	0	0	0	0
	502	0	0	0	0	0	0	0	0	0	0	0	0	0	0	0	0	0	0	0	0									502	0	0	0	0	0	0	0	0	0	0	0	0	0	0	0	0	0	0	0
	503	0	0	0	0	0	0	0	0	0	0	0	0	0	0	0	0	0	0	0	0									503	0	0	0	0	0	0	0	0	0	0	0	0	0	0	0	0	0	0	0
	504	0	0	0	0	0	0	0	0	0	0	0	0	0	0	0	0	0	0	0	0									504	0	0	0	0	0	0	0	0	0	0	0	0	0	0	0	0	0	0	0
	505	0	0	0	0	0	0	0	0	0	0	0	0	0	0	0	0	0	0	0	0									505	0	0	0	0	0	0	0	0	0	0	0	0	0	0	0	0	0	0	0
	506	0	0	0	0	0	0	0	0	0	0	0	0	0	0	0	0	0	0	0	0									506	0	0	0	0	0	0	0	0	0	0	0	0	0	0	0	0	0	0	0
	507	0	0	0	0	0	0	0	0	0	0	0	0	0	0	0	0	0	0	0	0									507	0	0	0	0	0	0	0	0	0	0	0	0	0	0	0	0	0	0	0
	508	0	0	0	0	0	0	0	0	0	0	0	0	0	0	0	0	0	0	0	0									508	0	0	0	0	0	0	0	0	0	0	0	0	0	0	0	0	0	0	0
	509	0	0	0	0	0	0	0	0	0	0	0	0	0	0	0	0	0	0	0	0									509	0	0	0	0	0	0	0	0	0	0	0	0	0	0	0	0	0	0	0
	510	0	0	0	0	0	0	0	0	0	0	0	0	0	0	0	0	0	0	0	0									510	0	0	0	0	0	0	0	0	0	0	0	0	0	0	0	0	0	0	0
	511	0	0	0	0	0	0	0	0	0	0	0	0	0	0	0	0	0	0	0	0									511	0	0	0	0	0	0	0	0	0	0	0	0	0	0	0	0	0	0	0
	512	0	0	0	0	0	0	0	0	0	0	0	0	0	0	0	0	0	0	0	0									512	0	0	0	0	0	0	0	0	0	0	0	0	0	0	0	0	0	0	0
	513	0	0	0	0	0	0	0	0	0	0	0	0	0	0	0	0	0	0	0	0									513	0	0	0	0	0	0	0	0	0	0	0	0	0	0	0	0	0	0	0
	514	0	0	0	0	0	0	0	0	0	0	0	0	0	0	0	0	0	0	0	0									514	0	0	0	0	0	0	0	0	0	0	0	0	0	0	0	0	0	0	0
	515	0	0	0	0	0	0	0	0	0	0	0	0	0	0	0	0	0	0	0	0									515	0	0	0	0	0	0	0	0	0	0	0	0	0	0	0	0	0	0	0
	516	0	0	0	0	0	0	0	0	0	0	0	0	0	0	0	0	0	0	0	0									516	0	0	0	0	0	0	0	0	0	0	0	0	0	0	0	0	0	0	0
	517	0	0	0	0	0	0	0	0	0	0	0	0	0	0	0	0	0	0	0	0									517	0	0	0	0	0	0	0	0	0	0	0	0	0	0	0	0	0	0	0
	518	0	0	0	0	0	0	0	0	0	0	0	0	0	0	0	0	0	0	0	0									518	0	0	0	0	0	0	0	0	0	0	0	0	0	0	0	0	0	0	0
	519	0	0	0	0	0	0	0	0	0	0	0	0	0	0	0	0	0	0	0	0									519	0	0	0	0	0	0	0	0	0	0	0	0	0	0	0	0	0	0	0
	520	0	0	0	0	0	0	0	0	0	0	0	0	0	0	0	0	0	0	0	0									520	0	0	0	0	0	0	0	0	0	0	0	0	0	0	0	0	0	0	0
	521	0	0	0	0	0	0	0	0	0	0	0	0	0	0	0	0	0	0	0	0									521	0	0	0	0	0	0	0	0	0	0	0	0	0	0	0	0	0	0	0
	522	0	0	0	0	0	0	0	0	0	0	0	0	0	0	0	0	0	0	0	0									522	0	0	0	0	0	0	0	0	0	0	0	0	0	0	0	0	0	0	0
	523	0	0	0	0	0	0	0	0	0	0	0	0	0	0	0	0	0	0	0	0									523	0	0	0	0	0	0	0	0	0	0	0	0	0	0	0	0	0	0	0
	524	0	0	0	0	0	0	0	0	0	0	0	0	0	0	0	0	0	0	0	0									524	0	0	0	0	0	0	0	0	0	0	0	0	0	0	0	0	0	0	0
	525	0	0	0	0	0	0	0	0	0	0	0	0	0	0	0	0	0	0	0	0									525	0	0	0	0	0	0	0	0	0	0	0	0	0	0	0	0	0	0	0
	526	0	0	0	0	0	0	0	0	0	0	0	0	0	0	0	0	0	0	0	0									526	0	0	0	0	0	0	0	0	0	0	0	0	0	0	0	0	0	0	0
	527	0	0	0	0	0	0	0	0	0	0	0	0	0	0	0	0	0	0	0	0									527	0	0	0	0	0	0	0	0	0	0	0	0	0	0	0	0	0	0	0
	528	0	0	0	0	0	0	0	0	0	0	0	0	0	0	0	0	0	0	0	0									528	0	0	0	0	0	0	0	0	0	0	0	0	0	0	0	0	0	0	0
	529	0	0	0	0	0	0	0	0	0	0	0	0	0	0	0	0	0	0	0	0									529	0	0	0	0	0	0	0	0	0	0	0	0	0	0	0	0	0	0	0
	530	0	0	0	0	0	0	0	0	0	0	0	0	0	0	0	0	0	0	0	0									530	0	0	0	0	0	0	0	0	0	0	0	0	0	0	0	0	0	0	0
	531	0	0	0	0	0	0	0	0	0	0	0	0	0	0	0	0	0	0	0	0									531	0	0	0	0	0	0	0	0	0	0	0	0	0	0	0	0	0	0	0
	532	0	0	0	0	0	0	0	0	0	0	0	0	0	0	0	0	0	0	0	0									532	0	0	0	0	0	0	0	0	0	0	0	0	0	0	0	0	0	0	0
	533	0	0	0	0	0	0	0	0	0	0	0	0	0	0	0	0	0	0	0	0									533	0	0	0	0	0	0	0	0	0	0	0	0	0	0	0	0	0	0	0
	534	0	0	0	0	0	0	0	0	0	0	0	0	0	0	0	0	0	0	0	0									534	0	0	0	0	0	0	0	0	0	0	0	0	0	0	0	0	0	0	0
	535	0	0	0	0	0	0	0	0	0	0	0	0	0	0	0	0	0	0	0	0									535	0	0	0	0	0	0	0	0	0	0	0	0	0	0	0	0	0	0	0
	536	0	0	0	0	0	0	0	0	0	0	0	0	0	0	0	0	0	0	0	0									536	0	0	0	0	0	0	0	0	0	0	0	0	0	0	0	0	0	0	0
	537	0	0	0	0	0	0	0	0	0	0	0	0	0	0	0	0	0	0	0	0									537	0	0	0	0	0	0	0	0	0	0	0	0	0	0	0	0	0	0	0
	538	0	0	0	0	0	0	0	0	0	0	0	0	0	0	0	0	0	0	0	0									538	0	0	0	0	0	0	0	0	0	0	0	0	0	0	0	0	0	0	0
	539	0	0	0	0	0	0	0	0	0	0	0	0	0	0	0	0	0	0	0	0									539	0	0	0	0	0	0	0	0	0	0	0	0	0	0	0	0	0	0	0
	540	0	0	0	0	0	0	0	0	0	0	0	0	0	0	0	0	0	0	0	0									540	0	0	0	0	0	0	0	0	0	0	0	0	0	0	0	0	0	0	0
	541	0	0	0	0	0	0	0	0	0	0	0	0	0	0	0	0	0	0	0	0									541	0	0	0	0	0	0	0	0	0	0	0	0	0	0	0	0	0	0	0
	542	0	0	0	0	0	0	0	0	0	0	0	0	0	0	0	0	0	0	0	0									542	0	0	0	0	0	0	0	0	0	0	0	0	0	0	0	0	0	0	0
	543	0	0	0	0	0	0	0	0	0	0	0	0	0	0	0	0	0	0	0	0									543	0	0	0	0	0	0	0	0	0	0	0	0	0	0	0	0	0	0	0
	544	0	0	0	0	0	0	0	0	0	0	0	0	0	0	0	0	0	0	0	0									544	0	0	0	0	0	0	0	0	0	0	0	0	0	0	0	0	0	0	0
	545	0	0	0	0	0	0	0	0	0	0	0	0	0	0	0	0	0	0	0	0									545	0	0	0	0	0	0	0	0	0	0	0	0	0	0	0	0	0	0	0
	546	0	0	0	0	0	0	0	0	0	0	0	0	0	0	0	0	0	0	0	0									546	0	0	0	0	0	0	0	0	0	0	0	0	0	0	0	0	0	0	0
	547	0	0	0	0	0	0	0	0	0	0	0	0	0	0	0	0	0	0	0	0									547	0	0	0	0	0	0	0	0	0	0	0	0	0	0	0	0	0	0	0
	548	0	0	0	0	0	0	0	0	0	0	0	0	0	0	0	0	0	0	0	0									548	0	0	0	0	0	0	0	0	0	0	0	0	0	0	0	0	0	0	0
	549	0	0	0	0	0	0	0	0	0	0	0	0	0	0	0	0	0	0	0	0									549	0	0	0	0	0	0	0	0	0	0	0	0	0	0	0	0	0	0	0
	550	0	0	0	0	0	0	0	0	0	0	0	0	0	0	0	0	0	0	0	0									550	0	0	0	0	0	0	0	0	0	0	0	0	0	0	0	0	0	0	0
	551	0	0	0	0	0	0	0	0	0	0	0	0	0	0	0	0	0	0	0	0									551	0	0	0	0	0	0	0	0	0	0	0	0	0	0	0	0	0	0	0
[truncated: 671 more rows]
[truncated: 3 more columns]

## Sheet: ANODSIM
	OPTINALYSIS: SEQUENCE ANALYSIS THROUGH A LOOKING-GLASS
[truncated: 1,247 more rows]
[truncated: 3 more columns]

[truncated: 7 more sheets: ANOVA-II, ANOSEM, ANODSE, ANOGEM, ANOHAM, ANOQUM, OTHER FILES]
